# Supplementary material for: An integrated signature of extracellular matrix proteins and a diastolic function imaging parameter predicts post-MI long-term outcomes
Source: Front Cardiovasc Med. 2023 Apr 12;10:1123682. doi: 10.3389/fcvm.2023.1123682 (PMC10132266; doi:10.3389/fcvm.2023.1123682)
Supplement: Supplementary file 2 [file Datasheet2.xlsx]

## Sheet: TOC
Supplementary Tables
Supplementary Table 1	Echocardiographic imaging variables of post-myocardial infarction patients in CDCS study
Supplementary Table 2	Hypothesis testing (two-sample t-test) of data features between MACE and event-free patients and between the HF subgroup and event-free patients in the CDCS cohort.
Supplementary Table 3	Partial correlations (penalized estimates) associated with the edges connecting at least one of the echocardiographic imaging variables and clinical biomarkers in the CDCS cohort.
Supplementary Table 4	MACE signature derived by the supervised analysis module of iOmicsPASS+ using the CDCS data, with edge-specific d-scores of the two groups (MACE and event-free).
Supplementary Table 5	Biological function enrichment analysis of the proteins in the MACE signature, accounting for tissue-specific mRNA expression.
Supplementary Table 6	HF signature derived by the supervised analysis module of iOmicsPASS+ using the CDCS data, with edge-specific d-scores of the two groups (HF and event-free).
Supplementary Table 7	Biological function enrichment analysis of the proteins in the HF signature, accounting for tissue-specific mRNA expression.
Supplementary Table 8	Summary table of tissue-specific over-expression of individual genes encoding the plasma proteins at their respective, potential sites of origin.
Supplementary Table 9	Echocardiographic imaging variables of post-myocardial infarction patients in IMMACULATE study
Supplementary Table 10	Statistical summary of the risk of MACE and HF adjusted for medication use after hospital discharge in CDCS and IMMACULATE cohort using Cox proportional hazards model.

## Sheet: SuppTable1
CDCS study
	Event-free	MACE	P-value for event-free vs MACE	HF	P-value for event-free vs HF
	(n = 185)	(n = 279)		(n = 117)
Heart dimensions
Interventricular septum, IVS (mm)	11.4 (2.2)	12.1 (2.9)	0.008	12.4 (2.8)	0.001
Posterior wall thickness, PWT (mm)	11 (1.9)	11.5 (2.9)	0.105	11.5 (2.3)	0.106
Left ventricle (LV) mass, LVMi (g/m2)	124 (31.1)	141 (46.6)	<0.001	148 (39.0)	<0.001
Left ventricle internal dimension diastole, LVIDDi (mm/m2)	28.1 (3.8)	29.2 (4.3)	0.008	30.2 (5.0)	<0.001
Left ventricle internal dimension systole, LVIDSi (mm/m2)	18.8 (3.9)	19.9 (4.6)	0.01	21.4 (5.0)	<0.001
Left ventricle end diastolic volume, LVEDVi (mL/m2)	64.4 (15.3)	66.9 (20.9)	0.211	69.0 (22.4)	0.06
Left ventricle end systolic volume, LVESVi (mL/m2)	27.7 (12.1)	31.6 (17.6)	0.021	35.7 (20.3)	<0.001
Left ventricle ejection fraction, LVEF (%)	58.4 (10.8)	56 (12.4)	0.032	51.7 (13.6)	<0.001
Left Atrial (LA) width (mm)	40.3 (5.9)	41.8 (7)	0.018	44.3 (6.9)	<0.001
Left Atrial (LA) area (cm2)	20.7 (5.7)	23 (5.6)	<0.001	24.6 (6.2)	<0.001
Transmitral flow
Deceleration Time, DT (msec)	238 (67.3)	237 (73.8)	0.865	229 (77.5)	0.288
Peak E/A ratio	1.11 (0.6)	1.04 (0.4)	0.195	1.05 (0.5)	0.421
Pulmonary vein flow
Peak S/D ratio	1.39 (0.5)	1.32 (0.4)	0.145	1.23 (0.5)	0.017
Peak AR (cm/s)	28.7 (7.8)	28.1 (7.7)	0.415	28.8 (8.4)	0.942
Tissue Doppler imaging
e' (cm/s), average of lateral and septal annuli	8.1 (2.2)	7.6 (2.2)	0.027	7.2 (2.3)	0.001
a' (cm/s), average of lateral and septal annuli	9.3 (2.1)	9.1 (2.4)	0.368	8.6 (2.3)	0.005
s' (cm/s), average of lateral and septal annuli	7.6 (1.4)	7.4 (1.7)	0.288	6.9 (1.6)	<0.001
e'/a' ratio	0.91 (0.3)	0.89 (0.4)	0.519	0.88 (0.4)	0.485
E/e' ratio	9.2 (3.1)	10.7 (4.2)	<0.001	12.2 (5.0)	<0.001

## Sheet: SuppTable2
Data Feature	Data type	Label	Mean in eventFree	Mean in MACE	Mean in HF	Event-free compared to MACE					Event-free compared to HF					Significant (EFvsMACE)	Significant (EFvsHF)	iOmicsPASS markers (MACE)	iOmicsPASS markers (HF)
						AUC	95% CI	Difference (MACE - EF)	t-test p-value	adjusted p-value	AUC	95% CI	Difference (HF - EF)	t-test p-value	adjusted p-value
NTproBNP	Clinical Biomarker	NT-proBNP	4.27651	4.78557	5.29752	0.65	(0.59 - 0.7)	0.509061	5.4964e-08	1.16112e-05	0.79	(0.74 - 0.84)	1.02101	7.04323e-20	1.19031e-16	*	*	*	*
BNP	Clinical Biomarker	BNP	2.75718	3.2187	3.61307	0.65	(0.6 - 0.7)	0.461523	1.1076e-08	3.63545e-06	0.78	(0.73 - 0.83)	0.855888	1.27414e-17	1.07665e-14	*	*	*	*
SL008099	Protein	CAPG	10.5608	10.9958	11.2308	0.68	(0.63 - 0.73)	0.435028	2.70468e-12	4.5709e-09	0.77	(0.72 - 0.83)	0.669984	1.93231e-14	1.08853e-11	*	*	*	*
SL009324	Protein	FSTL3	12.89	13.1008	13.2582	0.64	(0.59 - 0.69)	0.210887	1.29069e-08	3.63545e-06	0.75	(0.7 - 0.81)	0.368292	4.53181e-13	1.27646e-10	*	*	*	*
SL001777	Protein	CST3	11.3836	11.5941	11.7548	0.64	(0.59 - 0.69)	0.210526	6.54726e-09	3.63545e-06	0.74	(0.68 - 0.79)	0.371215	3.14121e-11	6.6358e-09	*	*	*	*
SL006527	Protein	EFEMP1	10.6514	10.8098	10.9463	0.63	(0.58 - 0.68)	0.158398	5.71187e-07	6.03316e-05	0.74	(0.68 - 0.8)	0.294909	8.5523e-12	2.06477e-09	*	*	*	*
NTproANP	Clinical Biomarker	NT-proANP	-0.0151422	0.264746	0.551611	0.62	(0.57 - 0.67)	0.279888	2.60209e-06	0.000199888	0.74	(0.69 - 0.8)	0.566753	1.66956e-13	7.05391e-11	*	*	*	*
SL000591	Protein	TIMP1	6.27288	6.43405	6.55013	0.64	(0.59 - 0.69)	0.161166	3.93337e-08	9.49627e-06	0.73	(0.67 - 0.79)	0.277251	3.17418e-10	4.87669e-08	*	*	*	*
SL002644	Protein	EGFR	14.6383	14.4966	14.4094	0.64	(0.59 - 0.7)	-0.141686	1.20731e-08	3.63545e-06	0.73	(0.68 - 0.79)	-0.228872	3.73554e-13	1.26261e-10	*	*	*	*
SL006119	Protein	TFF3	13.502	13.76	13.9493	0.63	(0.58 - 0.68)	0.257948	1.84653e-07	2.60053e-05	0.73	(0.67 - 0.79)	0.447298	5.96032e-10	7.74841e-08	*	*	*	*
SL003201	Protein	KDR	12.9207	12.7897	12.6994	0.63	(0.58 - 0.68)	-0.130971	5.01057e-07	5.64524e-05	0.72	(0.66 - 0.78)	-0.221361	1.75724e-10	2.96973e-08	*	*	*	*
SL000283	Protein	B2M	11.1069	11.3602	11.5615	0.62	(0.57 - 0.67)	0.253319	1.84434e-07	2.60053e-05	0.72	(0.66 - 0.78)	0.454599	7.15068e-10	8.63189e-08	*	*	*	*
SL003869	Protein	GDF15	10.4982	10.7776	11.0323	0.62	(0.57 - 0.67)	0.279388	8.5346e-06	0.000554749	0.72	(0.67 - 0.78)	0.534115	1.23389e-10	2.31697e-08	*	*	*	*
SL000268	Protein	PLG	14.271	14.1608	14.0831	0.62	(0.57 - 0.68)	-0.110231	6.87733e-06	0.000464907	0.71	(0.65 - 0.77)	-0.187936	1.29102e-09	1.45455e-07	*	*	*	*
SL006610	Protein	ADAMTS13	11.7366	11.5969	11.4392	0.61	(0.56 - 0.66)	-0.139703	0.000229061	0.00542121	0.71	(0.66 - 0.77)	-0.29743	4.24204e-10	5.97421e-08	*	*	*	*
SL007206	Protein	THBS2	14.0267	14.2575	14.5021	0.6	(0.55 - 0.66)	0.230761	6.02283e-05	0.00221746	0.71	(0.65 - 0.77)	0.475361	4.28207e-09	4.25689e-07	*	*	*	*
SL007056	Protein	BMP10	10.3898	10.5859	10.6901	0.64	(0.59 - 0.69)	0.196024	7.83007e-08	1.47031e-05	0.7	(0.64 - 0.77)	0.300286	6.92429e-09	6.50114e-07	*	*	*	*
LAarea	Echo Imaging	LA area	20.7319	22.9075	24.4813	0.63	(0.58 - 0.68)	2.1756	4.40019e-05	0.00190675	0.7	(0.64 - 0.76)	3.74939	1.84533e-07	8.66282e-06	*	*	*	*
SL005156	Protein	NBL1	9.70308	10.0929	10.3457	0.63	(0.58 - 0.68)	0.389829	9.71968e-08	1.64263e-05	0.7	(0.64 - 0.76)	0.642661	2.91057e-08	2.13863e-06	*	*	*	*
SL010495	Protein	CDK2 CCNA2	8.29808	8.19767	8.1291	0.63	(0.58 - 0.68)	-0.100416	0.00410913	0.0403746	0.7	(0.64 - 0.76)	-0.168977	1.55106e-06	5.46104e-05	*	*
SL001992	Protein	TNFRSF1A	10.4787	10.6977	10.8661	0.62	(0.57 - 0.67)	0.219012	6.36021e-07	6.3228e-05	0.7	(0.63 - 0.76)	0.387346	1.73361e-08	1.33173e-06	*	*	*	*
SL000382	Protein	CKB CKM	10.1708	9.76525	9.48075	0.62	(0.57 - 0.67)	-0.40553	1.31988e-05	0.000766903	0.7	(0.64 - 0.77)	-0.690029	3.85873e-08	2.71719e-06	*	*	*	*
SL018509	Protein	RSPO3	10.5293	10.6594	10.7745	0.61	(0.56 - 0.66)	0.130111	5.05761e-05	0.00208472	0.7	(0.64 - 0.76)	0.24517	4.51827e-08	2.83787e-06	*	*	*	*
ANP	Clinical Biomarker	ANP	3.54092	3.7355	3.98976	0.58	(0.53 - 0.63)	0.194574	0.00108421	0.0156607	0.7	(0.64 - 0.77)	0.448839	1.45413e-09	1.53592e-07	*	*	*	*
SL005357	Protein	REG1A	8.88988	9.20311	9.38656	0.62	(0.57 - 0.67)	0.313226	1.0239e-06	9.10729e-05	0.69	(0.62 - 0.75)	0.496685	4.80731e-08	2.90156e-06	*	*	*	*
SL003320	Protein	FIGF	9.09876	9.29427	9.38841	0.62	(0.57 - 0.68)	0.195513	2.58423e-06	0.000199888	0.69	(0.63 - 0.75)	0.289654	6.88279e-08	3.75223e-06	*	*	*	*
SL002654	Protein	EPHA2	11.3725	11.613	11.7493	0.62	(0.57 - 0.67)	0.240538	2.84366e-07	3.50939e-05	0.69	(0.63 - 0.76)	0.376815	1.0209e-08	8.62659e-07	*	*	*	*
SL005213	Protein	RELT	11.2152	11.4117	11.5496	0.62	(0.57 - 0.67)	0.196494	2.44068e-06	0.000199888	0.69	(0.62 - 0.75)	0.334407	4.31404e-08	2.83787e-06	*	*	*	*
SL004140	Protein	EFNA4	10.8874	11.0479	11.18	0.61	(0.56 - 0.66)	0.160526	1.089e-05	0.000657289	0.69	(0.63 - 0.75)	0.292554	3.14654e-07	1.29699e-05	*	*	*	*
SL005158	Protein	CLEC4M	15.5667	15.4897	15.4261	0.61	(0.55 - 0.66)	-0.0770038	3.47629e-05	0.00158782	0.69	(0.62 - 0.75)	-0.140603	1.30707e-08	1.05188e-06	*	*		*
SL003994	Protein	BMP1	11.6397	11.496	11.3834	0.61	(0.56 - 0.66)	-0.143641	5.90586e-05	0.00221746	0.69	(0.63 - 0.76)	-0.256324	5.39916e-08	3.14641e-06	*	*	*	*
SL012517	Protein	RSPO4	8.49863	8.71308	8.84316	0.61	(0.56 - 0.66)	0.214441	2.69851e-05	0.00134132	0.69	(0.63 - 0.75)	0.344529	1.54708e-07	7.47017e-06	*	*	*	*
SL000466	Protein	IGFBP2	9.52643	9.81908	10.0405	0.6	(0.55 - 0.65)	0.292652	5.5029e-05	0.00216277	0.69	(0.62 - 0.75)	0.514047	5.84538e-08	3.2929e-06	*	*	*	*
E.averageE	Echo Imaging	E/E'	9.22306	10.7523	12.3551	0.59	(0.54 - 0.65)	1.52929	1.06903e-05	0.000657289	0.69	(0.63 - 0.75)	3.13208	8.02403e-09	7.13716e-07	*	*
SL004759	Protein	EIF5	10.8357	11.095	11.2041	0.62	(0.57 - 0.67)	0.259328	2.90719e-07	3.50939e-05	0.68	(0.62 - 0.74)	0.368356	4.53388e-08	2.83787e-06	*	*	*	*
SL004151	Protein	IL15RA	9.82524	9.97758	10.0698	0.62	(0.57 - 0.67)	0.152339	0.000689403	0.0116509	0.68	(0.62 - 0.74)	0.244527	2.92071e-05	0.000530752	*	*	*	*
SL005168	Protein	GHR	10.1752	9.96605	9.84299	0.61	(0.56 - 0.67)	-0.209157	1.36137e-05	0.000766903	0.68	(0.61 - 0.74)	-0.332213	1.46973e-07	7.30542e-06	*	*	*	*
SL007237	Protein	MAP2K4	15.5462	15.3573	15.2539	0.61	(0.56 - 0.67)	-0.188837	4.25445e-06	0.00031261	0.68	(0.61 - 0.74)	-0.29228	9.94498e-08	5.09304e-06	*	*	*	*
LVMi	Echo Imaging	LVMi	124.006	140.332	148.113	0.6	(0.55 - 0.65)	16.3263	5.84695e-06	0.000411722	0.68	(0.62 - 0.75)	24.1069	8.5385e-08	4.50939e-06	*	*	*	*
TNI	Clinical Biomarker	TNI	2.20613	2.6208	2.92964	0.6	(0.54 - 0.65)	0.414679	8.84039e-05	0.00292946	0.68	(0.62 - 0.74)	0.723515	3.04762e-07	1.28762e-05	*	*		*
SL005233	Protein	EDA2R	9.88019	9.96427	10.0891	0.6	(0.55 - 0.65)	0.0840769	0.0779962	0.271221	0.68	(0.62 - 0.74)	0.208873	0.00212528	0.0150913		*	*	*
LVIDSi	Echo Imaging	LVIDSi	18.8205	20.1176	21.7402	0.59	(0.54 - 0.65)	1.29702	0.00145422	0.0195051	0.68	(0.62 - 0.74)	2.91963	3.74523e-07	1.50701e-05	*	*	*	*
SL004646	Protein	LAYN	10.5397	10.6509	10.7835	0.59	(0.54 - 0.64)	0.111187	0.00701576	0.0583284	0.68	(0.62 - 0.75)	0.243817	4.21477e-05	0.00071949		*	*	*
SL012783	Protein	WFIKKN1	9.78085	9.62523	9.48503	0.59	(0.54 - 0.64)	-0.15562	0.00140262	0.0189634	0.68	(0.61 - 0.74)	-0.295818	2.84435e-07	1.26499e-05	*	*
SL000280	Protein	GOT1	12.1314	12.341	12.3688	0.65	(0.6 - 0.7)	0.209642	3.55152e-09	3.00103e-06	0.67	(0.61 - 0.74)	0.237402	4.85808e-07	1.90934e-05	*	*	*
SL008614	Protein	EFNB1	10.8774	11.0252	11.0931	0.62	(0.57 - 0.68)	0.147794	2.11453e-05	0.00111674	0.67	(0.61 - 0.74)	0.215718	1.33635e-05	0.000298974	*	*	*	*
SL005193	Protein	JAM2	13.1038	13.2101	13.2878	0.61	(0.55 - 0.66)	0.106298	0.000101838	0.00324728	0.67	(0.6 - 0.73)	0.184001	6.78325e-06	0.000177111	*	*	*	*
SL002684	Protein	CSF1	10.489	10.5868	10.6341	0.61	(0.56 - 0.66)	0.097823	0.000193353	0.00494851	0.67	(0.6 - 0.73)	0.145094	1.17436e-05	0.000268198	*	*	*	*
SL000541	Protein	PLG	11.9362	11.8568	11.8132	0.61	(0.56 - 0.66)	-0.0794346	2.96141e-05	0.00142994	0.67	(0.61 - 0.74)	-0.123065	2.68852e-07	1.228e-05	*	*	*	*
SL014092	Protein	CDON	12.6527	12.5234	12.4479	0.61	(0.56 - 0.66)	-0.129347	0.000157294	0.00435783	0.67	(0.61 - 0.73)	-0.204824	6.20843e-07	2.33161e-05	*	*	*	*
SL000024	Protein	F3	11.1236	11.3309	11.4253	0.61	(0.55 - 0.66)	0.20724	0.000354146	0.0071933	0.67	(0.61 - 0.74)	0.301605	2.59985e-05	0.000488194	*	*	*	*
SL014209	Protein	KLRF1	8.6144	8.56284	8.4948	0.61	(0.56 - 0.66)	-0.0515596	0.236032	0.48312	0.67	(0.6 - 0.73)	-0.119598	0.0098109	0.0487387		*
SL005430	Protein	SECTM1	10.3913	10.5204	10.6058	0.6	(0.54 - 0.65)	0.129161	8.80009e-05	0.00292946	0.67	(0.6 - 0.73)	0.214555	6.542e-06	0.000175492	*	*	*	*
SL001996	Protein	ANGPT2	7.57371	7.74088	7.84377	0.6	(0.55 - 0.65)	0.167172	6.03569e-05	0.00221746	0.67	(0.61 - 0.73)	0.270064	1.60926e-06	5.5503e-05	*	*	*	*
SL011888	Protein	SMOC1	11.7953	11.9312	12.0606	0.59	(0.54 - 0.64)	0.135839	7.03677e-05	0.00251046	0.67	(0.6 - 0.73)	0.265276	1.3445e-05	0.000298974	*	*	*	*
SL003326	Protein	CXCL11	11.8693	12.116	12.3236	0.59	(0.54 - 0.64)	0.246663	0.000357537	0.0071933	0.67	(0.61 - 0.73)	0.454247	1.12947e-06	4.14958e-05	*	*
SL014009	Protein	HDGFRP2	9.60567	9.68283	9.73679	0.59	(0.54 - 0.64)	0.077163	0.00875341	0.0654569	0.67	(0.61 - 0.74)	0.131122	0.000283372	0.00313006		*	*	*
SL005115	Protein	SPON1	11.0656	11.188	11.2924	0.58	(0.53 - 0.63)	0.122401	0.000199111	0.00494851	0.67	(0.61 - 0.73)	0.226879	5.72437e-07	2.19868e-05	*	*	*	*
SL000052	Protein	TNNT2	11.8693	12.0725	12.2801	0.58	(0.53 - 0.63)	0.20314	0.000543236	0.00976669	0.67	(0.61 - 0.73)	0.410813	5.85038e-06	0.000164691	*	*	*	*
SL002704	Protein	PTN	10.7566	10.9159	11.176	0.57	(0.51 - 0.62)	0.159342	0.00431026	0.041864	0.67	(0.61 - 0.74)	0.419466	1.09382e-05	0.000256744	*	*
SL001774	Protein	FABP3	14.4254	14.5866	14.7977	0.57	(0.52 - 0.63)	0.161207	0.00677945	0.0581587	0.67	(0.6 - 0.73)	0.372261	3.27216e-06	0.000106345		*	*	*
SL004141	Protein	EFNA5	11.3952	11.5748	11.659	0.61	(0.55 - 0.66)	0.179565	1.84633e-05	0.00100655	0.66	(0.59 - 0.72)	0.26379	1.84745e-05	0.000367317	*	*	*	*
SL011448	Protein	TNFRSF4	9.366	9.52901	9.60989	0.61	(0.56 - 0.66)	0.163015	0.000181098	0.00478211	0.66	(0.6 - 0.72)	0.243886	0.000115026	0.00153067	*	*	*	*
SL006542	Protein	FCN2	10.5847	10.3364	10.2194	0.6	(0.55 - 0.66)	-0.24835	0.000138615	0.00390433	0.66	(0.6 - 0.73)	-0.365291	5.09865e-06	0.000156668	*	*	*
SL004208	Protein	ANXA1	12.3211	12.503	12.5907	0.6	(0.55 - 0.66)	0.181984	0.00200919	0.0242538	0.66	(0.6 - 0.72)	0.269633	0.000217012	0.0024949	*	*	*	*
SL005221	Protein	SCARF1	12.7654	12.8736	12.9568	0.6	(0.55 - 0.65)	0.108223	0.000302272	0.00654381	0.66	(0.6 - 0.72)	0.191429	1.0908e-05	0.000256744	*	*	*	*
SL008631	Protein	DSC2	11.5695	11.7217	11.8446	0.59	(0.54 - 0.64)	0.152172	0.000125305	0.00378151	0.66	(0.59 - 0.72)	0.275065	1.55187e-05	0.000327832	*	*	*	*
SL003803	Protein	ERBB4	7.51629	7.41799	7.33347	0.59	(0.53 - 0.64)	-0.0983014	0.0202855	0.112034	0.66	(0.6 - 0.72)	-0.182821	9.78512e-06	0.000243189		*
SL004357	Protein	MSTN	12.083	11.9259	11.7834	0.58	(0.53 - 0.63)	-0.157031	0.00182442	0.0224889	0.66	(0.59 - 0.72)	-0.299606	5.69108e-06	0.000164309	*	*
SL000592	Protein	TIMP2	8.6597	8.75034	8.85537	0.58	(0.53 - 0.63)	0.0906428	0.00262201	0.0295413	0.66	(0.59 - 0.72)	0.195673	5.73624e-06	0.000164309	*	*	*	*
SL000002	Protein	VEGFA	13.4707	13.5329	13.6066	0.58	(0.53 - 0.63)	0.0621769	0.00465453	0.0443043	0.66	(0.6 - 0.73)	0.135832	3.58038e-06	0.000112053	*	*	*	*
SL021043	Protein	GDF11 MSTN	9.5994	9.50883	9.40975	0.58	(0.52 - 0.63)	-0.0905729	0.0054054	0.0496474	0.66	(0.6 - 0.73)	-0.189654	9.7504e-06	0.000243189	*	*
SL011809	Protein	DCTPP1	12.9646	13.0791	13.1596	0.58	(0.52 - 0.63)	0.114502	0.0162723	0.0992789	0.66	(0.59 - 0.72)	0.195038	0.00239121	0.0167683		*	*
SL000247	Protein	PGD	12.2496	11.9025	11.452	0.57	(0.51 - 0.62)	-0.34708	0.00357852	0.0371024	0.66	(0.6 - 0.72)	-0.797533	2.94495e-07	1.27615e-05	*	*
SL007306	Protein	FAM3B	10.103	10.2079	10.3357	0.57	(0.52 - 0.62)	0.104911	0.00610223	0.0537124	0.66	(0.59 - 0.72)	0.232667	5.22467e-06	0.00015733		*		*
LVEF	Echo Imaging	LVEF	58.3876	56.0428	51.805	0.56	(0.51 - 0.62)	-2.34474	0.0311204	0.148569	0.66	(0.59 - 0.72)	-6.58252	1.44457e-05	0.000309028		*	*	*
LAwidth	Echo Imaging	LA width	40.3811	41.8718	44.1256	0.56	(0.51 - 0.61)	1.49075	0.0144839	0.0930918	0.66	(0.59 - 0.72)	3.74456	2.82106e-06	9.34823e-05		*		*
SL009400	Protein	CHRDL1	11.4443	11.5518	11.7173	0.56	(0.51 - 0.61)	0.107452	0.00808424	0.0638886	0.66	(0.59 - 0.72)	0.272974	3.43405e-06	0.000109501		*	*	*
SL011509	Protein	PYY	11.0098	11.1814	11.2638	0.61	(0.56 - 0.66)	0.171656	0.000987947	0.0146459	0.65	(0.59 - 0.72)	0.254048	0.000186343	0.00221774	*	*	*	*
SL009431	Protein	HINT1	11.1095	11.2676	11.3259	0.61	(0.56 - 0.67)	0.158098	7.66827e-05	0.00264477	0.65	(0.59 - 0.71)	0.216487	1.37203e-05	0.000301135	*	*	*
SL002519	Protein	ERBB3	8.24038	8.13614	8.07823	0.6	(0.55 - 0.65)	-0.104233	0.000613065	0.0107925	0.65	(0.59 - 0.72)	-0.162146	5.97049e-06	0.000164691	*	*
SL005172	Protein	IGFBP6	9.48663	9.62297	9.71176	0.6	(0.54 - 0.65)	0.136339	0.000123875	0.00378151	0.65	(0.58 - 0.71)	0.225129	1.79308e-05	0.000360751	*	*	*	*
SL005703	Protein	NOTCH1	14.4669	14.4005	14.3668	0.6	(0.54 - 0.65)	-0.0664238	0.000254362	0.00588867	0.65	(0.59 - 0.71)	-0.100054	5.3064e-06	0.00015733	*	*	*	*
SL012561	Protein	REG4	10.9025	11.0876	11.2035	0.59	(0.54 - 0.64)	0.185054	0.000163439	0.00445503	0.65	(0.58 - 0.71)	0.301012	1.40699e-05	0.000304847	*	*	*	*
SL008158	Protein	HIST1H3A	11.1925	11.3787	11.4886	0.59	(0.54 - 0.65)	0.186276	0.000171538	0.00460157	0.65	(0.59 - 0.72)	0.296136	7.63582e-06	0.000195523	*	*	*	*
SL005152	Protein	RARRES2	11.6252	11.7085	11.7914	0.59	(0.53 - 0.64)	0.0833877	0.00311805	0.0336196	0.65	(0.59 - 0.72)	0.166194	1.96396e-05	0.000377169	*	*
SL004865	Protein	CDH6	8.92103	8.83614	8.74006	0.59	(0.54 - 0.64)	-0.0848961	0.015768	0.0972551	0.65	(0.59 - 0.72)	-0.180975	2.73563e-05	0.000502523		*
SL012248	Protein	PTK2	8.58183	8.4963	8.43314	0.59	(0.54 - 0.64)	-0.085536	0.109424	0.317198	0.65	(0.58 - 0.71)	-0.148691	0.00649021	0.0359621		*
SL016969	Protein	CSRP3	11.1498	11.2774	11.3725	0.59	(0.54 - 0.65)	0.127603	0.0107502	0.0750737	0.65	(0.59 - 0.71)	0.222771	0.000346439	0.00363653		*	*	*
SL001800	Protein	TNFRSF1B	13.7234	13.8763	14.0052	0.58	(0.53 - 0.63)	0.1529	0.000230963	0.00542121	0.65	(0.59 - 0.71)	0.281843	1.30203e-06	4.68178e-05	*	*	*	*
SL000550	Protein	SERPINA5	16.5069	16.2399	16.1033	0.58	(0.53 - 0.64)	-0.267017	0.000135634	0.00390433	0.65	(0.58 - 0.71)	-0.403565	0.00131109	0.0100716	*	*
SL004876	Protein	SERPINA4	15.0745	15.001	14.9417	0.58	(0.52 - 0.63)	-0.0734292	0.00347695	0.0362719	0.65	(0.59 - 0.72)	-0.132795	3.26238e-05	0.000576663	*	*
SL000299	Protein	FGF1	7.54178	7.4837	7.42664	0.58	(0.53 - 0.64)	-0.0580818	0.015046	0.094177	0.65	(0.59 - 0.71)	-0.115139	6.81195e-06	0.000177111		*		*
SL000522	Protein	MMP12	11.0752	11.3162	11.51	0.58	(0.53 - 0.63)	0.241006	0.00390002	0.0390002	0.65	(0.59 - 0.71)	0.434815	4.35031e-05	0.000727924	*	*	*	*
SL008059	Protein	RPS3	8.76292	8.65697	8.5423	0.58	(0.53 - 0.63)	-0.105958	0.0604941	0.231301	0.65	(0.59 - 0.71)	-0.220626	0.00265765	0.0181106		*
SL005230	Protein	UNC5C	11.9529	12.0539	12.1512	0.58	(0.52 - 0.63)	0.101	0.00222095	0.0260653	0.65	(0.59 - 0.72)	0.198382	1.63506e-05	0.000336982	*	*	*	*
SL017289	Protein	UBB	11.0228	10.9251	10.8522	0.58	(0.53 - 0.64)	-0.0977112	0.0147813	0.0935597	0.65	(0.58 - 0.71)	-0.170591	0.00139994	0.0106572		*
SL007547	Protein	HAVCR2	13.4113	13.5331	13.669	0.57	(0.51 - 0.62)	0.121812	0.00300472	0.0331894	0.65	(0.58 - 0.71)	0.257717	1.07903e-05	0.000256744	*	*	*	*
SL003970	Protein	PTH	11.5597	11.7377	11.9155	0.57	(0.51 - 0.62)	0.177942	0.0011342	0.0161075	0.65	(0.58 - 0.72)	0.35575	1.05623e-05	0.000256744	*	*	*	*
SL002506	Protein	PLAUR	13.4332	13.5253	13.6469	0.56	(0.51 - 0.62)	0.0920689	0.00954862	0.0695256	0.65	(0.59 - 0.71)	0.213725	2.46401e-06	8.32837e-05		*	*	*
SL003327	Protein	CFD	10.1371	10.2204	10.3202	0.56	(0.51 - 0.61)	0.0833482	0.0164299	0.0998799	0.65	(0.58 - 0.71)	0.183179	0.000194995	0.00230449		*		*
SL008835	Protein	ASGR1	9.92255	10.2013	10.3156	0.62	(0.57 - 0.67)	0.278762	7.09004e-07	6.65676e-05	0.64	(0.58 - 0.71)	0.393052	2.11916e-05	0.000402403	*	*	*	*
SL007274	Protein	EFNB2	13.4315	13.6434	13.6978	0.61	(0.56 - 0.66)	0.21198	0.000470323	0.00893086	0.64	(0.57 - 0.7)	0.266329	0.00082995	0.00704832	*	*
SL004686	Protein	TNFSF15	9.56163	9.7587	9.83114	0.61	(0.56 - 0.66)	0.197074	2.58761e-05	0.00132517	0.64	(0.57 - 0.71)	0.269513	4.56335e-05	0.000748744	*	*	*
SL000582	Protein	BIRC5	9.15162	9.05388	9.04094	0.61	(0.56 - 0.66)	-0.0977387	0.000881268	0.0134151	0.64	(0.58 - 0.71)	-0.110682	0.00167682	0.0125948	*	*
SL002093	Protein	H2AFZ	10.2779	10.0677	10.0322	0.61	(0.56 - 0.66)	-0.210209	0.00287482	0.0319634	0.64	(0.57 - 0.7)	-0.245634	0.0121367	0.0569704	*
SL006448	Protein	HRG	12.0184	11.8923	11.8728	0.61	(0.55 - 0.66)	-0.126033	0.000225574	0.00542121	0.64	(0.58 - 0.7)	-0.145532	0.000144694	0.00182487	*	*	*	*
SL014469	Protein	SHC1	12.8832	13.0899	13.1524	0.61	(0.56 - 0.67)	0.206677	0.000133854	0.00390433	0.64	(0.57 - 0.7)	0.269206	0.000135941	0.00174046	*	*	*
SL004160	Protein	NTRK2	9.94331	9.84679	9.81295	0.6	(0.55 - 0.65)	-0.096522	0.000400472	0.00777927	0.64	(0.57 - 0.7)	-0.130356	0.000595495	0.00538175	*	*	*
SL000521	Protein	MMP1	10.0479	10.3229	10.4562	0.6	(0.55 - 0.65)	0.274972	0.000290986	0.00644254	0.64	(0.58 - 0.71)	0.408338	4.27061e-05	0.000721734	*	*	*
LPC 20:4	Lipid	LPC 20:4	-1.77458	-1.91599	-2.01038	0.59	(0.54 - 0.64)	-0.141416	0.00149665	0.0196072	0.64	(0.57 - 0.7)	-0.235798	7.02252e-05	0.00101173	*	*
SL004183	Protein	CDH3	14.689	14.6047	14.5426	0.59	(0.53 - 0.64)	-0.084287	0.000802158	0.0125183	0.64	(0.58 - 0.71)	-0.146371	1.93275e-05	0.000376379	*	*
SL003183	Protein	CXCL10	11.2449	11.4493	11.5657	0.59	(0.54 - 0.64)	0.204388	0.000889048	0.0134151	0.64	(0.57 - 0.7)	0.320798	7.12399e-05	0.00101173	*	*	*	*
SL004299	Protein	BIRC7	6.87908	6.80523	6.75783	0.59	(0.53 - 0.64)	-0.0738538	0.00968962	0.0699806	0.64	(0.57 - 0.7)	-0.121252	0.000117244	0.00154799		*
SL005201	Protein	AMH	13.2976	13.233	13.1844	0.59	(0.53 - 0.64)	-0.0646401	0.0011253	0.0161075	0.64	(0.57 - 0.7)	-0.113226	1.73985e-05	0.000354258	*	*	*	*
PE 34:2	Lipid	PE 34:2	-0.877667	-0.654951	-0.482681	0.58	(0.53 - 0.63)	0.222716	0.0015767	0.0201865	0.64	(0.58 - 0.71)	0.394986	1.12432e-05	0.000260288	*	*	*	*
SL004557	Protein	CD59	10.8531	10.9711	11.0724	0.58	(0.53 - 0.64)	0.117974	0.000364479	0.0072467	0.64	(0.58 - 0.71)	0.219224	9.16463e-05	0.00125921	*	*	*	*
SL006910	Protein	CTSV	10.1004	9.9425	9.82748	0.58	(0.52 - 0.63)	-0.157865	0.00228088	0.026584	0.64	(0.57 - 0.7)	-0.272886	1.59947e-05	0.000333717	*	*
SL004458	Protein	PI3	13.5662	13.7563	13.8797	0.58	(0.53 - 0.63)	0.190136	0.000663634	0.0113287	0.64	(0.57 - 0.7)	0.313524	3.4796e-05	0.00060624	*	*	*	*
SL011068	Protein	IL17RC	10.1482	10.2691	10.3421	0.58	(0.53 - 0.64)	0.120932	0.00149266	0.0196072	0.64	(0.57 - 0.7)	0.193894	0.000205594	0.00239623	*	*	*	*
SL010328	Protein	MED1	16.2302	16.1424	16.0741	0.58	(0.53 - 0.64)	-0.0877796	0.00211189	0.0250183	0.64	(0.58 - 0.71)	-0.156167	2.62874e-05	0.000488195	*	*	*	*
SL008486	Protein	LGALS9	10.716	10.8495	10.9464	0.58	(0.53 - 0.63)	0.133489	0.000198919	0.00494851	0.64	(0.58 - 0.7)	0.230412	6.04193e-06	0.000164691	*	*	*	*
PE 35:2	Lipid	PE 35:2	-5.07554	-4.91555	-4.75227	0.57	(0.52 - 0.62)	0.159986	0.0145057	0.0930918	0.64	(0.57 - 0.7)	0.323267	0.000149652	0.00187343		*	*	*
SL003650	Protein	ENO1	15.5409	15.2966	15.146	0.57	(0.52 - 0.62)	-0.244252	0.00183637	0.0224889	0.64	(0.57 - 0.7)	-0.394872	5.6794e-05	0.000871074	*	*	*	*
SL000558	Protein	F2	17.3211	17.2737	17.2148	0.57	(0.52 - 0.63)	-0.0473658	0.0199941	0.111456	0.64	(0.58 - 0.71)	-0.10625	5.622e-05	0.000871074		*
averageS	Echo Imaging	S'	7.56795	7.34812	6.8497	0.56	(0.5 - 0.61)	-0.219828	0.13262	0.356891	0.64	(0.57 - 0.7)	-0.718245	7.08723e-05	0.00101173		*
SL003755	Protein	MCL1	10.1259	10.2674	10.3596	0.56	(0.51 - 0.61)	0.141556	0.00840854	0.0645306	0.64	(0.58 - 0.71)	0.233723	0.000179093	0.00217747		*	*	*
SL010390	Protein	CCDC80	11.3333	11.4197	11.5382	0.56	(0.51 - 0.61)	0.0864098	0.018116	0.104517	0.64	(0.57 - 0.7)	0.204893	5.10684e-05	0.000814204		*	*	*
SL005084	Protein	POSTN	12.4194	12.5003	12.6151	0.56	(0.5 - 0.61)	0.0808871	0.0255806	0.131402	0.64	(0.57 - 0.71)	0.195709	3.27572e-05	0.000576663		*		*
SL001888	Protein	SLPI	15.1379	15.1985	15.2669	0.56	(0.51 - 0.61)	0.0605383	0.0134811	0.08865	0.64	(0.57 - 0.71)	0.128944	0.000163133	0.00199778		*		*
SL005789	Protein	STC1	11.1667	11.2624	11.372	0.56	(0.51 - 0.62)	0.0956591	0.0109237	0.0759428	0.64	(0.57 - 0.7)	0.205285	5.50667e-05	0.000861692		*	*	*
SL004060	Protein	ECE1	14.3059	14.1941	14.1557	0.61	(0.56 - 0.66)	-0.111768	4.71818e-05	0.00199343	0.63	(0.57 - 0.7)	-0.150237	4.40845e-05	0.00073042	*	*	*
SL006528	Protein	FAP	9.66414	9.53735	9.50494	0.61	(0.56 - 0.66)	-0.126784	0.000494129	0.00926422	0.63	(0.57 - 0.7)	-0.159197	0.000385659	0.00392629	*	*	*	*
SL007151	Protein	GPD1	10.5409	10.7126	10.7863	0.6	(0.55 - 0.66)	0.17164	0.0033988	0.0360518	0.63	(0.57 - 0.7)	0.24533	0.00165057	0.012453	*	*	*
SL002688	Protein	SPP1	11.9753	12.2484	12.3296	0.6	(0.54 - 0.65)	0.273087	0.000305894	0.00654381	0.63	(0.57 - 0.69)	0.35432	0.000305146	0.00330575	*	*	*	*
SL000049	Protein	PROS1	12.1722	12.0723	12.0147	0.6	(0.55 - 0.66)	-0.0999331	7.13029e-05	0.00251046	0.63	(0.57 - 0.7)	-0.157501	4.87515e-05	0.000784667	*	*
SL004860	Protein	HTRA2	11.8359	11.9545	11.977	0.6	(0.55 - 0.66)	0.118536	0.00106242	0.0154784	0.63	(0.57 - 0.7)	0.141062	0.00284145	0.0189804	*	*
SL000314	Protein	C3	16.1628	15.8414	15.7425	0.6	(0.55 - 0.65)	-0.321357	0.000537245	0.00976283	0.63	(0.56 - 0.69)	-0.420236	0.000611903	0.00547152	*	*
Creatinine	Clinical Biomarker	Creatinine	4.48625	4.58193	4.64335	0.59	(0.54 - 0.65)	0.0956734	5.38239e-05	0.00216277	0.63	(0.56 - 0.69)	0.157101	7.52391e-05	0.00104225	*	*
PC 38:4	Lipid	PC 38:4	-0.378767	-0.504029	-0.576054	0.59	(0.54 - 0.65)	-0.125262	0.00211693	0.0250183	0.63	(0.56 - 0.69)	-0.197287	0.000429214	0.0041929	*	*
SL015510	Protein	ISG15	11.248	11.4967	11.6078	0.59	(0.54 - 0.64)	0.248734	0.000193826	0.00494851	0.63	(0.56 - 0.69)	0.359847	6.69454e-05	0.000983806	*	*	*	*
SL002763	Protein	KLK11	9.80755	9.97	10.0431	0.59	(0.54 - 0.64)	0.162455	0.000293536	0.00644254	0.63	(0.57 - 0.7)	0.235559	0.000108034	0.00146061	*	*	*	*
SL004067	Protein	PLA2G10	9.23092	9.17915	9.13918	0.59	(0.54 - 0.64)	-0.0517714	0.0388629	0.169801	0.63	(0.57 - 0.7)	-0.0917393	0.00089096	0.00741735		*
SL003324	Protein	F10	12.212	12.1043	12.0277	0.59	(0.54 - 0.64)	-0.107752	0.000321558	0.00670905	0.63	(0.57 - 0.7)	-0.184288	4.82846e-05	0.000784625	*	*
SL010288	Protein	CA6	12.2001	11.934	11.8198	0.59	(0.54 - 0.65)	-0.266066	0.000656465	0.0113207	0.63	(0.57 - 0.69)	-0.380297	0.000134508	0.00173526	*	*	*
SL003177	Protein	ICAM2	10.807	10.7176	10.685	0.59	(0.54 - 0.65)	-0.0894175	0.00365423	0.0372027	0.63	(0.57 - 0.7)	-0.122012	0.00173321	0.0129036	*	*
LVIDDi	Echo Imaging	LVIDDi	28.0373	29.2355	30.3043	0.58	(0.53 - 0.63)	1.19819	0.00161708	0.0202434	0.63	(0.56 - 0.69)	2.26698	2.98147e-05	0.000536029	*	*		*
PE 34:1	Lipid	PE 34:1	-2.12674	-1.9485	-1.80577	0.58	(0.53 - 0.63)	0.178244	0.00520121	0.0485638	0.63	(0.57 - 0.69)	0.320974	6.38768e-05	0.000955326	*	*	*	*
PE 36:3	Lipid	PE 36:3	-1.43366	-1.22803	-1.06611	0.58	(0.52 - 0.63)	0.205627	0.00851678	0.0645442	0.63	(0.57 - 0.7)	0.367551	0.000246384	0.00277592		*
SL000383	Protein	CKM	9.41593	9.23837	9.12455	0.58	(0.52 - 0.63)	-0.177558	0.0078041	0.0631049	0.63	(0.57 - 0.7)	-0.291384	0.000611058	0.00547152		*
SL000019	Protein	APOA1	14.1677	14.0907	14.054	0.58	(0.53 - 0.64)	-0.0770494	0.00115937	0.0161928	0.63	(0.57 - 0.7)	-0.11376	0.000331945	0.00350937	*	*
SL010368	Protein	IDUA	10.5886	10.4558	10.3785	0.58	(0.53 - 0.64)	-0.132796	0.00237938	0.0274677	0.63	(0.57 - 0.69)	-0.210086	0.000125687	0.00163393	*	*
SL007651	Protein	FGF23	9.17651	9.36354	9.51303	0.58	(0.53 - 0.63)	0.187028	0.00427098	0.0417223	0.63	(0.56 - 0.69)	0.336517	0.000804999	0.00687095	*	*	*	*
SL003060	Protein	FGFR1	9.53269	9.62733	9.69633	0.58	(0.53 - 0.63)	0.0946386	0.00139817	0.0189634	0.63	(0.56 - 0.69)	0.16364	7.42501e-05	0.00103705	*	*	*	*
SL002602	Protein	TFF2	13.3037	13.4793	13.5704	0.58	(0.52 - 0.63)	0.175593	0.00251476	0.0285231	0.63	(0.57 - 0.69)	0.266714	0.000401376	0.00402021	*	*	*	*
SL004347	Protein	IL22	10.0146	10.2026	10.2972	0.57	(0.52 - 0.63)	0.187958	0.00207861	0.0249139	0.63	(0.57 - 0.69)	0.282546	0.000371699	0.00383031	*	*	*	*
SL003190	Protein	CCL15	12.1988	12.3059	12.4151	0.57	(0.52 - 0.62)	0.107115	0.0112205	0.0770837	0.63	(0.57 - 0.7)	0.216253	0.00014288	0.00181554		*	*	*
SL000251	Protein	AHSG	10.8148	10.7557	10.7075	0.57	(0.51 - 0.62)	-0.0591509	0.0155918	0.0967669	0.63	(0.57 - 0.7)	-0.107306	0.000332248	0.00350937		*	*
SL010489	Protein	CAMK1	12.4595	12.3989	12.3243	0.57	(0.52 - 0.63)	-0.0606212	0.0783905	0.271801	0.63	(0.57 - 0.7)	-0.135232	0.00117967	0.00918729		*	*	*
SL000622	Protein	F5	15.892	15.8126	15.7531	0.57	(0.52 - 0.63)	-0.0793866	0.00564444	0.0512855	0.63	(0.57 - 0.7)	-0.138883	0.000158391	0.00195388		*
SL004863	Protein	TNFRSF19	9.93761	10.0449	10.1991	0.57	(0.51 - 0.62)	0.107287	0.062683	0.235409	0.63	(0.57 - 0.7)	0.261463	0.00207993	0.0148944		*	*	*
averageA	Echo Imaging	A'	9.34535	8.86462	8.19137	0.56	(0.5 - 0.61)	-0.480728	0.0294595	0.144309	0.63	(0.57 - 0.7)	-1.15398	4.19291e-05	0.00071949		*		*
SL005699	Protein	APOL1	15.0849	15.029	14.9703	0.56	(0.51 - 0.61)	-0.05589	0.0292832	0.143862	0.63	(0.56 - 0.7)	-0.114633	0.000368801	0.00382376		*
SL019019	Protein	PIANP	12.2322	12.3315	12.4622	0.56	(0.51 - 0.61)	0.0992857	0.0385817	0.1698	0.63	(0.56 - 0.69)	0.230043	0.000555521	0.00513694		*	*	*
SL000403	Protein	COL18A1	16.1689	16.2232	16.2908	0.56	(0.51 - 0.61)	0.0543178	0.0401344	0.173029	0.63	(0.56 - 0.7)	0.121931	0.000378389	0.00387563		*		*
SL000048	Protein	PROC	10.4836	10.4179	10.3413	0.56	(0.51 - 0.62)	-0.0657038	0.0112714	0.0771021	0.63	(0.56 - 0.69)	-0.142326	0.000122018	0.00159852		*
SL004477	Protein	S100A9	12.2309	12.3676	12.4945	0.56	(0.51 - 0.62)	0.136698	0.020049	0.111456	0.63	(0.56 - 0.69)	0.26359	0.000310993	0.00334763		*	*
SL000590	Protein	SERPINA7	15.3885	15.3417	15.2882	0.55	(0.5 - 0.61)	-0.0467722	0.0181524	0.104517	0.63	(0.56 - 0.69)	-0.100253	6.15941e-05	0.000929411		*
SL000323	Protein	C7	10.4248	10.4864	10.5798	0.55	(0.5 - 0.6)	0.0615439	0.0556733	0.221252	0.63	(0.56 - 0.69)	0.154972	5.48745e-05	0.000861692		*		*
SL000525	Protein	MMP7	11.1593	11.2435	11.4074	0.54	(0.49 - 0.59)	0.0841346	0.0968087	0.304102	0.63	(0.56 - 0.69)	0.248038	0.000152829	0.00189913		*	*	*
SL008382	Protein	CST5	12.9505	13.1007	13.3821	0.54	(0.49 - 0.59)	0.150275	0.0757224	0.267484	0.63	(0.57 - 0.7)	0.431655	7.3025e-05	0.00102844		*	*	*
SL005361	Protein	APOD	12.2461	12.1296	12.1184	0.62	(0.57 - 0.67)	-0.116534	0.00341319	0.0360518	0.62	(0.56 - 0.69)	-0.12767	0.0112914	0.0543659	*
SL006397	Protein	NRP1	11.2046	11.3106	11.3163	0.62	(0.56 - 0.67)	0.106016	4.23176e-05	0.00188202	0.62	(0.56 - 0.69)	0.11169	0.00078302	0.00675155	*	*	*	*
SL005173	Protein	IL10RA	10.4748	10.3966	10.3672	0.61	(0.55 - 0.66)	-0.0781502	0.00249937	0.0285231	0.62	(0.56 - 0.69)	-0.10755	0.000276869	0.00307834	*	*
SL010451	Protein	CFC1	10.8894	10.9741	11.0047	0.6	(0.55 - 0.65)	0.0846295	0.0041078	0.0403746	0.62	(0.56 - 0.69)	0.115287	0.00246903	0.0171714	*	*	*	*
SL010457	Protein	DLL4	8.60583	8.72631	8.74354	0.6	(0.55 - 0.65)	0.120486	0.00690077	0.0583284	0.62	(0.55 - 0.68)	0.137712	0.0117078	0.0555844			*
SL003919	Protein	KLK14	13.1269	13.0638	13.0612	0.6	(0.54 - 0.65)	-0.0630196	0.0146523	0.0930918	0.62	(0.56 - 0.69)	-0.0656164	0.0706921	0.200453
SL011528	Protein	RPS7	10.0595	10.1977	10.2401	0.6	(0.54 - 0.65)	0.138122	0.00443566	0.0427551	0.62	(0.56 - 0.68)	0.180583	0.00338118	0.0219777	*	*
SL007266	Protein	PSMD7	8.17598	8.24448	8.26117	0.6	(0.55 - 0.65)	0.0685018	0.05572	0.221252	0.62	(0.56 - 0.69)	0.0851964	0.0437827	0.145435
SL004209	Protein	ANXA2	12.6155	12.7843	12.7936	0.6	(0.55 - 0.66)	0.168837	0.000312477	0.00660108	0.62	(0.56 - 0.68)	0.178148	0.00121697	0.00939125	*	*
SL009207	Protein	DCTN2	10.5108	10.5971	10.6389	0.6	(0.55 - 0.65)	0.0862919	0.000261992	0.00598333	0.62	(0.55 - 0.69)	0.128169	0.000183963	0.00221774	*	*	*	*
SL004338	Protein	FGF20	8.474	8.38158	8.37621	0.59	(0.54 - 0.64)	-0.0924186	0.0167233	0.0998942	0.62	(0.56 - 0.69)	-0.0977938	0.0914476	0.235231
SL011768	Protein	NUDCD3	8.32945	8.47586	8.52951	0.59	(0.54 - 0.65)	0.14641	0.000392013	0.0077035	0.62	(0.56 - 0.69)	0.200058	0.000868901	0.00730568	*	*	*
SL011535	Protein	RBM39	8.50789	8.59434	8.63865	0.59	(0.53 - 0.64)	0.0864494	0.078577	0.271801	0.62	(0.56 - 0.69)	0.130759	0.0261501	0.102538			*	*
SL008516	Protein	CST2	14.2465	14.4496	14.558	0.59	(0.53 - 0.64)	0.203035	0.00158982	0.0202014	0.62	(0.55 - 0.69)	0.311474	0.000508558	0.00480147	*	*	*	*
SL009768	Protein	CBX5	8.72534	8.63778	8.61518	0.59	(0.54 - 0.64)	-0.0875603	0.00161505	0.0202434	0.62	(0.56 - 0.69)	-0.110162	0.000536974	0.00504159	*	*	*
SL003710	Protein	CASP2	8.52023	8.43596	8.38934	0.59	(0.54 - 0.64)	-0.0842695	0.0824197	0.282534	0.62	(0.56 - 0.69)	-0.130892	0.0113873	0.0546328
SL006694	Protein	CNDP1	12.0971	11.8175	11.7614	0.59	(0.54 - 0.65)	-0.27962	3.07141e-05	0.00144185	0.62	(0.56 - 0.69)	-0.335696	0.000226369	0.00256754	*	*	*
SL003993	Protein	BMP6	14.2771	14.4098	14.4443	0.59	(0.54 - 0.64)	0.132697	0.000498842	0.00926422	0.62	(0.55 - 0.68)	0.167174	0.000226237	0.00256754	*	*	*
SL004066	Protein	PLA2G2E	8.04903	8.01308	7.97755	0.58	(0.52 - 0.63)	-0.0359486	0.217886	0.463763	0.62	(0.56 - 0.69)	-0.0714846	0.0340105	0.122816
SL004010	Protein	KIT	13.6942	13.5912	13.5108	0.58	(0.53 - 0.63)	-0.102978	0.00771114	0.0627854	0.62	(0.56 - 0.69)	-0.18333	0.0004044	0.00402021		*
SL000134	Protein	MET	13.1433	13.0678	13.023	0.58	(0.53 - 0.64)	-0.075471	0.00405151	0.0402768	0.62	(0.56 - 0.69)	-0.120274	0.000444538	0.00429325	*	*
SL005160	Protein	ESAM	12.1212	12.2239	12.2787	0.58	(0.53 - 0.64)	0.102731	0.00140081	0.0189634	0.62	(0.56 - 0.68)	0.157585	0.000296963	0.00323786	*	*
SL000250	Protein	SERPINF2	10.7869	10.7306	10.7071	0.58	(0.53 - 0.63)	-0.0562243	0.00857263	0.0646775	0.62	(0.56 - 0.69)	-0.0797637	0.00422897	0.0263725		*
SL010499	Protein	HCK	7.69233	7.6468	7.55921	0.58	(0.52 - 0.63)	-0.0455376	0.312463	0.558205	0.62	(0.56 - 0.68)	-0.133126	0.00112863	0.008913		*
SL000070	Protein	GPC3	9.617	9.51952	9.46032	0.58	(0.52 - 0.63)	-0.0974797	0.0216199	0.117228	0.62	(0.55 - 0.68)	-0.15668	0.00264262	0.0180811		*
SL000360	Protein	F10	12.4872	12.392	12.3191	0.58	(0.53 - 0.64)	-0.0952416	0.00080739	0.0125183	0.62	(0.56 - 0.69)	-0.168089	9.85369e-05	0.00134296	*	*
SL007336	Protein	SET	9.17876	9.12544	9.10169	0.58	(0.53 - 0.63)	-0.0533211	0.00275227	0.0308036	0.62	(0.55 - 0.68)	-0.0770704	0.00059113	0.00538175	*	*
SL010456	Protein	CST1	10.3339	10.5502	10.6712	0.58	(0.53 - 0.63)	0.216321	0.000801267	0.0125183	0.62	(0.55 - 0.69)	0.337277	0.000463579	0.00442627	*	*	*	*
averageE	Echo Imaging	E'	8.05481	7.52367	7.09833	0.57	(0.51 - 0.62)	-0.531137	0.0107373	0.0750737	0.62	(0.55 - 0.68)	-0.956477	0.000362397	0.00378056		*	*	*
PE 36:2	Lipid	PE 36:2	0.264864	0.434222	0.57104	0.57	(0.52 - 0.62)	0.169358	0.0199493	0.111456	0.62	(0.56 - 0.69)	0.306177	0.000857817	0.00724855		*
PI 35:2	Lipid	PI 35:2	-5.96779	-5.84373	-5.75779	0.57	(0.52 - 0.63)	0.124058	0.0245406	0.12722	0.62	(0.55 - 0.68)	0.209996	0.00185672	0.0135838		*
SM 38:2	Lipid	SM 38:2	-2.16467	-2.25563	-2.31483	0.57	(0.52 - 0.63)	-0.0909559	0.0140329	0.0919208	0.62	(0.56 - 0.69)	-0.150159	0.000643848	0.00569688		*
SL001938	Protein	INHBA	11.7538	11.881	11.9383	0.57	(0.51 - 0.62)	0.127142	0.00845069	0.0645306	0.62	(0.55 - 0.68)	0.184521	0.00378404	0.0242236		*	*
SL005171	Protein	IGFBP4	12.5868	12.6679	12.7203	0.57	(0.52 - 0.63)	0.0810933	0.000801261	0.0125183	0.62	(0.55 - 0.68)	0.133532	5.72126e-05	0.000871074	*	*	*
SL000272	Protein	SERPINC1	16.9124	16.8775	16.8464	0.57	(0.52 - 0.62)	-0.0349058	0.0261022	0.132471	0.62	(0.56 - 0.69)	-0.0659684	0.000593794	0.00538175		*
SL010498	Protein	EPHA3	7.33889	7.27597	7.24367	0.57	(0.52 - 0.63)	-0.0629153	0.119178	0.330723	0.62	(0.55 - 0.68)	-0.0952194	0.0623664	0.183303
SL000587	Protein	TG	8.45556	8.42202	8.39446	0.57	(0.52 - 0.62)	-0.0335321	0.271566	0.520043	0.62	(0.55 - 0.69)	-0.0610929	0.11888	0.278264
SL006378	Protein	ESD	11.9013	12.0275	12.0916	0.57	(0.52 - 0.63)	0.126153	0.0212096	0.115626	0.62	(0.55 - 0.68)	0.190238	0.0047549	0.028829		*
SL007025	Protein	JAK2	16.9868	16.9068	16.8519	0.57	(0.51 - 0.62)	-0.0799954	0.00814894	0.0638886	0.62	(0.56 - 0.69)	-0.134914	0.00110653	0.00883814		*	*
SL001990	Protein	IL1RN	12.2365	12.3581	12.4716	0.57	(0.51 - 0.62)	0.121584	0.0242169	0.126708	0.62	(0.56 - 0.69)	0.235064	0.000782772	0.00675155		*	*	*
SL017290	Protein	UBC	12.255	12.2063	12.1695	0.57	(0.52 - 0.63)	-0.0486792	0.158423	0.400103	0.62	(0.55 - 0.69)	-0.0854818	0.0855191	0.226177
SL003672	Protein	SOD3	9.24276	9.45794	9.55307	0.57	(0.52 - 0.63)	0.215178	0.0036206	0.0372027	0.62	(0.55 - 0.68)	0.310311	0.00183708	0.0135534	*	*
SL003188	Protein	CXCL9	9.52673	9.73646	9.90023	0.57	(0.51 - 0.62)	0.209728	0.00339659	0.0360518	0.62	(0.55 - 0.68)	0.373492	0.000208003	0.0024077	*	*	*	*
PE 34:3	Lipid	PE 34:3	-4.52737	-4.32874	-4.11955	0.56	(0.51 - 0.61)	0.198632	0.0148472	0.0936258	0.62	(0.56 - 0.69)	0.407825	6.45499e-05	0.000956923		*
PI 34:1	Lipid	PI 34:1	-1.8571	-1.69693	-1.56588	0.56	(0.51 - 0.62)	0.160167	0.0151334	0.0943741	0.62	(0.56 - 0.69)	0.291219	0.000418315	0.00413422		*
SL003303	Protein	CCL28	12.7673	12.8667	12.994	0.56	(0.51 - 0.61)	0.0994621	0.0621321	0.235409	0.62	(0.56 - 0.69)	0.226689	0.000752967	0.00655936		*
SL005224	Protein	MPL	7.36644	7.32546	7.27091	0.56	(0.51 - 0.61)	-0.0409876	0.25421	0.503652	0.62	(0.56 - 0.69)	-0.0955367	0.015259	0.0685845
SL004742	Protein	AFM	14.7682	14.7038	14.6496	0.56	(0.51 - 0.61)	-0.0644746	0.0174002	0.10318	0.62	(0.55 - 0.68)	-0.11864	0.000654236	0.00575864		*
SL005209	Protein	NOTCH3	9.27968	9.38214	9.49799	0.56	(0.5 - 0.61)	0.102455	0.0216421	0.117228	0.62	(0.55 - 0.68)	0.218308	0.000324411	0.00346997		*
SL018900	Protein	FTCD	11.3115	10.9981	10.755	0.56	(0.5 - 0.61)	-0.313433	0.0182882	0.10477	0.62	(0.55 - 0.68)	-0.556527	0.000556249	0.00513694		*
PC(P-30:0)	Lipid	PC(P-30:0)	-9.67632	-9.56196	-9.42453	0.55	(0.5 - 0.61)	0.11436	0.043625	0.184689	0.62	(0.55 - 0.68)	0.251799	0.000444567	0.00429325		*		*
SL006915	Protein	IL27 EBI3	9.57071	9.62931	9.70332	0.55	(0.5 - 0.6)	0.0586016	0.10468	0.313632	0.62	(0.56 - 0.69)	0.13261	0.00716144	0.0388733		*	*	*
SL011629	Protein	AIP	12.4531	12.3572	12.2181	0.55	(0.49 - 0.6)	-0.0959362	0.0624365	0.235409	0.62	(0.56 - 0.69)	-0.23504	0.000186313	0.00221774		*
LVESVi	Echo Imaging	LVESVi	27.0692	30.1004	34.9684	0.54	(0.49 - 0.59)	3.03117	0.0222152	0.11969	0.62	(0.56 - 0.69)	7.89919	0.000113295	0.00151959		*	*	*
SL003340	Protein	CHI3L1	13.9421	14.1462	14.542	0.54	(0.49 - 0.59)	0.204112	0.101747	0.310582	0.62	(0.55 - 0.69)	0.59987	0.000202254	0.00237368		*	*	*
SL007033	Protein	LTBP4	10.403	10.468	10.5394	0.54	(0.49 - 0.59)	0.0650022	0.0335594	0.155385	0.62	(0.55 - 0.68)	0.136413	0.000421581	0.00414228		*		*
SL004258	Protein	ADIPOQ	11.4137	11.5474	11.7463	0.54	(0.49 - 0.6)	0.133729	0.0323635	0.151508	0.62	(0.55 - 0.69)	0.332666	6.91121e-05	0.00100689		*
SL007674	Protein	LY9	10.6824	10.9295	10.8889	0.62	(0.57 - 0.67)	0.247057	9.74843e-05	0.00316824	0.61	(0.54 - 0.68)	0.206464	0.0099418	0.0490599	*	*	*
SL013240	Protein	CRK	12.7702	13.007	13.0268	0.6	(0.55 - 0.65)	0.23687	0.000338274	0.00697174	0.61	(0.55 - 0.68)	0.256612	0.0025471	0.0175698	*	*	*
SL006629	Protein	SIRT2	12.8162	12.9302	12.9623	0.6	(0.54 - 0.65)	0.113967	0.055351	0.221252	0.61	(0.55 - 0.68)	0.146048	0.0404379	0.137505
PC 40:8	Lipid	PC 40:8	-7.94081	-8.09087	-8.15002	0.59	(0.53 - 0.64)	-0.150056	0.00199835	0.0242538	0.61	(0.55 - 0.68)	-0.209208	0.000793263	0.00680515	*	*
SL003849	Protein	FGF9	9.01041	8.98548	8.97607	0.59	(0.54 - 0.64)	-0.0249331	0.493084	0.705599	0.61	(0.55 - 0.68)	-0.0343427	0.564308	0.731174
SL004078	Protein	BMP7	9.10459	9.24882	9.31873	0.59	(0.54 - 0.64)	0.144224	0.000804834	0.0125183	0.61	(0.54 - 0.67)	0.214139	0.00230874	0.0162573	*	*	*
SL001815	Protein	SOD2	15.4194	15.3164	15.28	0.59	(0.54 - 0.64)	-0.102965	0.00114653	0.016147	0.61	(0.55 - 0.68)	-0.139344	0.00104941	0.00848564	*	*	*	*
SL000420	Protein	FTH1 FTL	14.24	13.8892	13.7618	0.59	(0.53 - 0.64)	-0.350724	0.00156008	0.0201865	0.61	(0.55 - 0.68)	-0.478123	0.00113881	0.0089516	*	*
SM 43:1	Lipid	SM 43:1	-4.13134	-4.28052	-4.34007	0.58	(0.52 - 0.63)	-0.149177	0.00105475	0.0154784	0.61	(0.55 - 0.68)	-0.20873	0.000269419	0.00301535	*	*
SL004467	Protein	SERPINA10	12.6203	12.5212	12.4431	0.58	(0.52 - 0.63)	-0.0991072	0.0167279	0.0998942	0.61	(0.55 - 0.68)	-0.177137	0.000942289	0.00779676		*
SL004486	Protein	VEGFC	10.4385	10.5332	10.5726	0.58	(0.52 - 0.63)	0.094713	0.0120831	0.0810336	0.61	(0.55 - 0.68)	0.134101	0.00275983	0.0186564		*
SL005258	Protein	PLK1	7.66759	7.64905	7.63977	0.58	(0.53 - 0.63)	-0.0185408	0.65561	0.826483	0.61	(0.55 - 0.68)	-0.027825	0.652545	0.795099
SL003761	Protein	PTEN	9.53244	9.58889	9.62205	0.58	(0.52 - 0.63)	0.056451	0.441569	0.67109	0.61	(0.54 - 0.67)	0.0896111	0.259552	0.467139
SL001729	Protein	CSF3	10.3705	10.5062	10.5456	0.58	(0.53 - 0.63)	0.135678	0.0224547	0.120471	0.61	(0.54 - 0.67)	0.175114	0.028596	0.110085			*	*
SL004716	Protein	MAPK9	10.0344	9.96429	9.90372	0.58	(0.53 - 0.63)	-0.0701098	0.0446414	0.186281	0.61	(0.55 - 0.68)	-0.130676	0.00376194	0.0241737		*
SL000130	Protein	CCNB1	9.02176	8.90118	8.86009	0.58	(0.53 - 0.63)	-0.120579	0.0244248	0.127009	0.61	(0.55 - 0.68)	-0.16167	0.00571156	0.0324372		*
SL002762	Protein	CHGA	13.3417	13.5274	13.5938	0.58	(0.53 - 0.63)	0.185766	0.0683155	0.252081	0.61	(0.54 - 0.67)	0.252124	0.0554198	0.169366			*	*
SL003322	Protein	FLT4	13.0243	12.928	12.8818	0.57	(0.52 - 0.63)	-0.0962287	0.00698943	0.0583284	0.61	(0.55 - 0.67)	-0.142515	0.00111392	0.00883814		*	*
SL000573	Protein	APCS	15.2841	15.1985	15.1607	0.57	(0.51 - 0.62)	-0.085645	0.0044526	0.0427551	0.61	(0.55 - 0.68)	-0.123372	0.00179993	0.0133416	*	*
SL002621	Protein	MDK	14.6601	14.7547	14.8282	0.57	(0.52 - 0.62)	0.0945461	0.0282485	0.140826	0.61	(0.54 - 0.67)	0.168092	0.0071766	0.0388733		*
SL008904	Protein	LYVE1	8.32706	8.41371	8.44006	0.57	(0.52 - 0.62)	0.0866465	0.0113144	0.0771021	0.61	(0.54 - 0.67)	0.112995	0.00639649	0.0355594		*	*	*
SL004118	Protein	ACP5	12.8511	12.7651	12.7063	0.57	(0.52 - 0.62)	-0.0860436	0.00666215	0.057444	0.61	(0.54 - 0.68)	-0.144895	0.0010898	0.00877029		*	*
SL010455	Protein	CNTN5	9.07139	8.99535	8.95728	0.57	(0.52 - 0.62)	-0.0760324	0.0089323	0.0661549	0.61	(0.55 - 0.68)	-0.11411	0.000569264	0.00522856		*
SL011049	Protein	MASP1	12.1924	12.1308	12.0898	0.57	(0.52 - 0.62)	-0.0615972	0.0476335	0.19539	0.61	(0.54 - 0.67)	-0.102576	0.00658247	0.0363542		*
SL004346	Protein	IL20	8.38452	8.37171	8.32755	0.57	(0.51 - 0.62)	-0.0128082	0.670063	0.832652	0.61	(0.54 - 0.68)	-0.0569729	0.110148	0.265549
SL003643	Protein	GSTP1	12.8748	13.0061	13.0858	0.57	(0.52 - 0.62)	0.131272	0.0313062	0.149035	0.61	(0.55 - 0.68)	0.210912	0.00610321	0.0343814		*	*	*
SL014248	Protein	SEMA6B	11.4813	11.5879	11.6194	0.57	(0.52 - 0.63)	0.106639	0.0107019	0.0750737	0.61	(0.54 - 0.67)	0.138134	0.00976761	0.048694		*	*
AcylCarnitine 12:0	Lipid	AcylCarnitine 12:0	-5.62177	-5.44624	-5.32239	0.56	(0.51 - 0.61)	0.175526	0.0321338	0.15085	0.61	(0.54 - 0.67)	0.299377	0.00546663	0.0313173		*	*	*
GM3(d18:1/16:0)	Lipid	GM3(d18:1/16:0)	-6.43321	-6.344	-6.2718	0.56	(0.5 - 0.61)	0.0892097	0.0131612	0.0872252	0.61	(0.54 - 0.68)	0.16141	0.000397034	0.00401788		*
LPC 22:6	Lipid	LPC 22:6	-3.7538	-3.84766	-3.95602	0.56	(0.5 - 0.61)	-0.0938601	0.0544656	0.218639	0.61	(0.54 - 0.67)	-0.202215	0.00094576	0.00779676		*
SL000145	Protein	IL1R2	13.4022	13.3382	13.2669	0.56	(0.5 - 0.61)	-0.0640525	0.0329371	0.152922	0.61	(0.55 - 0.68)	-0.135383	0.000643411	0.00569688		*
SL004148	Protein	IL12RB1	9.10431	9.0474	8.97906	0.56	(0.5 - 0.61)	-0.0569105	0.1724	0.416818	0.61	(0.54 - 0.67)	-0.125252	0.00195072	0.01421		*
SL007100	Protein	LTA4H	12.2803	12.1364	12.0267	0.56	(0.51 - 0.61)	-0.143914	0.0441265	0.184753	0.61	(0.54 - 0.67)	-0.253586	0.00714168	0.0388733		*
SL000039	Protein	CXCL8	10.157	10.2536	10.3474	0.56	(0.5 - 0.61)	0.0966549	0.038308	0.169285	0.61	(0.55 - 0.68)	0.190419	0.00770295	0.0411962		*	*	*
SL000545	Protein	KLKB1	14.2987	14.2475	14.2028	0.56	(0.51 - 0.62)	-0.0511205	0.0553858	0.221252	0.61	(0.54 - 0.67)	-0.0958331	0.00673636	0.0370829		*
SL012108	Protein	PLCG1	9.08797	9.03801	9.00936	0.56	(0.5 - 0.61)	-0.0499555	0.0251017	0.129335	0.61	(0.54 - 0.67)	-0.0786111	0.00456358	0.0282507		*
SL003182	Protein	ITGAV ITGB5	9.76874	9.82639	9.89115	0.56	(0.5 - 0.61)	0.057653	0.380879	0.616102	0.61	(0.55 - 0.68)	0.122413	0.102835	0.25371
SL005207	Protein	NCR1	11.2812	11.3746	11.459	0.56	(0.51 - 0.62)	0.0933461	0.0769787	0.269346	0.61	(0.54 - 0.68)	0.177752	0.0117089	0.0555844			*	*
PI 36:1	Lipid	PI 36:1	-1.94425	-1.83634	-1.73108	0.55	(0.5 - 0.61)	0.107908	0.0701638	0.256487	0.61	(0.54 - 0.67)	0.21317	0.00393968	0.0250303		*
SL012769	Protein	FAM3D	13.2032	13.3851	13.5645	0.55	(0.5 - 0.61)	0.181811	0.0375978	0.167211	0.61	(0.55 - 0.68)	0.361219	0.000883145	0.00738868		*	*	*
SL000695	Protein	LCN2	14.2645	14.4068	14.5475	0.55	(0.5 - 0.6)	0.14227	0.0179367	0.104517	0.61	(0.54 - 0.67)	0.283007	0.000453448	0.00435413		*	*	*
SL004335	Protein	FGF17	7.72802	7.71712	7.6891	0.55	(0.5 - 0.61)	-0.0109003	0.595785	0.787635	0.61	(0.54 - 0.68)	-0.0389199	0.141337	0.310208
SL009216	Protein	DDC	7.80694	7.72928	7.67183	0.55	(0.49 - 0.6)	-0.0776604	0.010203	0.0721471	0.61	(0.55 - 0.68)	-0.135109	1.93757e-05	0.000376379		*
SL005167	Protein	LGALS8	9.10553	9.08884	9.08439	0.55	(0.49 - 0.6)	-0.0166893	0.634333	0.814607	0.61	(0.54 - 0.67)	-0.0211343	0.684293	0.817952
SL012469	Protein	GPC5	9.61111	9.51694	9.42399	0.55	(0.5 - 0.61)	-0.0941683	0.043425	0.184393	0.61	(0.54 - 0.67)	-0.18712	0.000474601	0.00450604		*	*	*
PeakS.D	Echo Imaging	Peak S/D	1.37486	1.2974	1.19421	0.54	(0.49 - 0.6)	-0.0774589	0.0864762	0.289396	0.61	(0.54 - 0.67)	-0.180645	0.00115652	0.00904868		*
PE 32:1	Lipid	PE 32:1	-5.92121	-5.74858	-5.51517	0.54	(0.49 - 0.6)	0.172628	0.0712868	0.259085	0.61	(0.54 - 0.67)	0.406043	0.000554475	0.00513694		*
SL004159	Protein	TNFRSF10D	9.96476	10.015	10.0934	0.54	(0.49 - 0.6)	0.0502812	0.181272	0.429239	0.61	(0.55 - 0.68)	0.128659	0.0221688	0.0916022
SL002508	Protein	IL18BP	13.4431	13.5124	13.6019	0.54	(0.49 - 0.59)	0.0692424	0.0708748	0.258143	0.61	(0.54 - 0.67)	0.158803	0.00111037	0.00883814		*
SL000415	Protein	CFH	15.9343	15.9124	15.872	0.54	(0.49 - 0.6)	-0.0219316	0.148062	0.381083	0.61	(0.55 - 0.68)	-0.0623076	0.00099782	0.00814645		*
SL003323	Protein	CCL18	13.1294	13.2237	13.3832	0.53	(0.48 - 0.59)	0.0943143	0.111657	0.319831	0.61	(0.54 - 0.67)	0.253798	0.000732827	0.00641698		*	*	*
SL007207	Protein	THBS4	8.84034	8.88574	8.99973	0.53	(0.48 - 0.58)	0.0454	0.223654	0.470953	0.61	(0.55 - 0.68)	0.159392	0.00102895	0.00836023		*
SL011770	Protein	LCMT1	10.9022	10.9827	10.9929	0.61	(0.56 - 0.66)	0.0804427	0.000124301	0.00378151	0.6	(0.54 - 0.67)	0.0907301	0.00172918	0.0129036	*	*	*
SL007804	Protein	BGN	10.4381	10.6256	10.6411	0.6	(0.55 - 0.65)	0.187485	0.000270973	0.00610592	0.6	(0.53 - 0.67)	0.203004	0.00360077	0.0233154	*	*	*
SL020172	Protein	RXFP1	8.78605	8.72411	8.73013	0.59	(0.54 - 0.64)	-0.0619352	0.117249	0.32706	0.6	(0.54 - 0.67)	-0.0559202	0.234694	0.437145
SL004329	Protein	GDF5	10.5486	10.6592	10.6672	0.59	(0.54 - 0.64)	0.11057	0.000469852	0.00893086	0.6	(0.53 - 0.67)	0.11858	0.00473114	0.028829	*	*
SL004752	Protein	FAM107A	8.16333	8.12853	8.14756	0.59	(0.54 - 0.64)	-0.0347974	0.141888	0.369625	0.6	(0.53 - 0.67)	-0.0157722	0.729378	0.854227
SL004875	Protein	IL1RL2	9.54532	9.49205	9.49085	0.59	(0.53 - 0.64)	-0.0532778	0.00929762	0.0680215	0.6	(0.54 - 0.67)	-0.0544784	0.0481535	0.154714
SL000310	Protein	C1R	10.712	10.835	10.8615	0.59	(0.53 - 0.64)	0.123083	0.00900333	0.0661549	0.6	(0.54 - 0.67)	0.149538	0.00983426	0.0487387		*
SL004331	Protein	CNTF	7.74596	7.68916	7.69567	0.59	(0.54 - 0.65)	-0.0567927	0.0109645	0.0759428	0.6	(0.54 - 0.67)	-0.0502873	0.159126	0.336995
SL007059	Protein	LY86	12.3264	12.3588	12.3518	0.59	(0.53 - 0.64)	0.032493	0.177033	0.423024	0.6	(0.53 - 0.66)	0.0254563	0.332272	0.538671
SL004492	Protein	TLR2	9.17503	9.25886	9.26119	0.59	(0.53 - 0.64)	0.0838295	0.0259312	0.132471	0.6	(0.54 - 0.67)	0.086159	0.053198	0.16557
SL003704	Protein	BID	11.0146	11.2442	11.2337	0.59	(0.54 - 0.65)	0.229653	0.000215771	0.00528482	0.6	(0.54 - 0.67)	0.219103	0.00223378	0.0157953	*	*
SL004637	Protein	MST1R	8.97868	8.92104	8.92219	0.58	(0.52 - 0.63)	-0.05764	0.10541	0.313632	0.6	(0.54 - 0.67)	-0.0564957	0.359432	0.563487
SL004650	Protein	FRZB	11.7295	11.6858	11.6726	0.58	(0.53 - 0.63)	-0.0436957	0.167628	0.41236	0.6	(0.53 - 0.67)	-0.0569051	0.212538	0.411914
SL010490	Protein	CAMK1D	11.1348	11.0862	11.0662	0.58	(0.52 - 0.63)	-0.0485761	0.136139	0.361754	0.6	(0.53 - 0.67)	-0.068609	0.141239	0.310208
SL000249	Protein	SERPINA1	10.2111	10.2998	10.344	0.58	(0.52 - 0.63)	0.088679	0.0302306	0.145971	0.6	(0.53 - 0.66)	0.132907	0.0114844	0.0548269
SL004720	Protein	PPP3R1	13.1048	13.0523	13.0393	0.58	(0.53 - 0.63)	-0.052502	0.0165525	0.0998942	0.6	(0.54 - 0.67)	-0.0654874	0.0292982	0.111947
SL006698	Protein	LCORL	7.96375	7.86912	7.86655	0.58	(0.53 - 0.63)	-0.0946252	0.0456936	0.189735	0.6	(0.53 - 0.67)	-0.0971925	0.0577984	0.173428
SL004349	Protein	IFNL2	7.40306	7.38359	7.34767	0.58	(0.52 - 0.63)	-0.019471	0.616656	0.798582	0.6	(0.54 - 0.67)	-0.05539	0.247585	0.452834
SL000316	Protein	C4A C4B	16.9225	16.8321	16.8232	0.58	(0.53 - 0.64)	-0.0903765	0.000633087	0.0110301	0.6	(0.53 - 0.67)	-0.099341	0.00254108	0.0175698	*	*	*	*
SL014094	Protein	ADGRG5	9.31752	9.26506	9.22426	0.58	(0.53 - 0.63)	-0.0524542	0.168129	0.412992	0.6	(0.54 - 0.67)	-0.0932597	0.00818555	0.0433654		*
SL000087	Protein	IL6	8.55083	8.70072	8.75129	0.58	(0.53 - 0.63)	0.149885	0.00179445	0.0222987	0.6	(0.53 - 0.67)	0.200458	0.0053835	0.0310516	*	*
SL002823	Protein	SELL	12.0713	11.989	11.9695	0.58	(0.53 - 0.63)	-0.0822527	0.00147221	0.0195909	0.6	(0.53 - 0.67)	-0.101791	0.00335143	0.0218684	*	*
SL008190	Protein	SPTAN1	7.89252	7.84228	7.87234	0.58	(0.53 - 0.64)	-0.0502374	0.219847	0.46676	0.6	(0.53 - 0.67)	-0.0201792	0.749506	0.869417
SL003066	Protein	SERPINF1	15.6673	15.7185	15.7426	0.58	(0.52 - 0.63)	0.0512385	0.00550118	0.050254	0.6	(0.53 - 0.66)	0.0753302	0.00302198	0.0198722		*	*	*
PI 32:0	Lipid	PI 32:0	-6.49277	-6.26337	-6.17498	0.57	(0.52 - 0.62)	0.229406	0.0084768	0.0645306	0.6	(0.54 - 0.67)	0.317794	0.00384908	0.0245469		*
SM 38:1	Lipid	SM 38:1	-1.87005	-1.96708	-2.01124	0.57	(0.51 - 0.62)	-0.0970309	0.00655828	0.0568385	0.6	(0.54 - 0.67)	-0.14119	0.00184455	0.0135534		*
SL019100	Protein	STUB1	10.3181	10.4448	10.5147	0.57	(0.51 - 0.62)	0.126675	0.101555	0.310582	0.6	(0.53 - 0.66)	0.196616	0.0312168	0.116204
SL001728	Protein	PDGFRA	10.3582	10.4498	10.4872	0.57	(0.52 - 0.63)	0.0915969	0.0587608	0.228289	0.6	(0.53 - 0.66)	0.129019	0.032299	0.118908
SL004153	Protein	CSF1R	7.62614	7.70181	7.73092	0.57	(0.52 - 0.62)	0.0756745	0.032782	0.152688	0.6	(0.53 - 0.67)	0.104777	0.0214327	0.0887778
SL004330	Protein	CD22	9.63204	9.6104	9.61151	0.57	(0.51 - 0.62)	-0.0216396	0.264903	0.512226	0.6	(0.53 - 0.67)	-0.0205269	0.556628	0.727464
SL005194	Protein	JAM3	12.2481	12.3649	12.4275	0.57	(0.51 - 0.62)	0.116824	0.0118377	0.0800227	0.6	(0.54 - 0.67)	0.179419	0.00197241	0.0143063		*
SL000017	Protein	VWF	12.9899	13.1787	13.247	0.57	(0.52 - 0.62)	0.188796	0.0101636	0.0721471	0.6	(0.53 - 0.66)	0.257072	0.00365284	0.0235622		*	*	*
SL004015	Protein	CPB2	13.676	13.627	13.6051	0.57	(0.52 - 0.62)	-0.0490018	0.00630224	0.0549009	0.6	(0.54 - 0.67)	-0.0709461	0.00118557	0.00919089		*	*	*
SL004154	Protein	L1CAM	8.69869	8.6134	8.56655	0.57	(0.52 - 0.62)	-0.0852894	0.00810343	0.0638886	0.6	(0.53 - 0.67)	-0.132139	0.00280173	0.0187894		*
SL000645	Protein	MMP10	9.30865	9.41317	9.46719	0.57	(0.51 - 0.62)	0.104516	0.0570129	0.223554	0.6	(0.53 - 0.67)	0.158533	0.016691	0.0728881			*
SL008381	Protein	CTSF	11.4462	11.3646	11.3206	0.57	(0.52 - 0.62)	-0.0815946	0.0168536	0.100291	0.6	(0.53 - 0.66)	-0.125593	0.00531091	0.0309354		*
LPC 20:5	Lipid	LPC 20:5	-4.32204	-4.47943	-4.55927	0.56	(0.51 - 0.62)	-0.15739	0.0181318	0.104517	0.6	(0.53 - 0.67)	-0.237223	0.00258359	0.0177491		*
SL004126	Protein	TNFRSF9	8.50365	8.55728	8.62742	0.56	(0.51 - 0.61)	0.0536267	0.191241	0.43853	0.6	(0.53 - 0.67)	0.123764	0.0325619	0.119112
SL004676	Protein	IGFBP5	10.914	10.9658	11.004	0.56	(0.5 - 0.61)	0.0517336	0.0112082	0.0770837	0.6	(0.54 - 0.67)	0.0899533	0.000995396	0.00814645		*
SL004352	Protein	IL17F	9.41296	9.51673	9.59438	0.56	(0.51 - 0.61)	0.103769	0.0633942	0.237027	0.6	(0.54 - 0.67)	0.18142	0.0136538	0.0621966			*	*
SL000524	Protein	MMP3	9.13096	9.02051	8.94795	0.56	(0.51 - 0.61)	-0.110453	0.0237762	0.125568	0.6	(0.53 - 0.66)	-0.183006	0.00277928	0.0187131		*
SL003169	Protein	CXCL5	8.98668	8.96613	8.91208	0.56	(0.51 - 0.62)	-0.0205502	0.588591	0.784564	0.6	(0.53 - 0.67)	-0.0745987	0.0502605	0.158485
SL004536	Protein	HAMP	13.7911	13.4953	13.306	0.56	(0.51 - 0.61)	-0.295747	0.0448084	0.186518	0.6	(0.53 - 0.66)	-0.485035	0.0126971	0.0587893
SL013489	Protein	AMN	7.27796	7.23889	7.21995	0.56	(0.51 - 0.61)	-0.0390701	0.37669	0.610946	0.6	(0.53 - 0.66)	-0.0580048	0.324598	0.530613
SL004925	Protein	AGR2	9.71789	9.70662	9.63736	0.56	(0.51 - 0.61)	-0.0112688	0.757405	0.884599	0.6	(0.53 - 0.66)	-0.0805321	0.0195317	0.081907
SL002522	Protein	RB1	10.7601	10.7175	10.7068	0.56	(0.51 - 0.61)	-0.0426226	0.303002	0.552398	0.6	(0.53 - 0.67)	-0.0532866	0.338799	0.544269
SL016828	Protein	EGFR	7.99357	7.89594	7.88628	0.56	(0.51 - 0.62)	-0.0976249	0.119838	0.332009	0.6	(0.53 - 0.66)	-0.107284	0.210821	0.41047
IVS	Echo Imaging	IVS	11.3802	11.9309	12.2282	0.55	(0.5 - 0.6)	0.550698	0.0201887	0.111865	0.6	(0.53 - 0.67)	0.848043	0.00545581	0.0313173		*	*	*
AcylCarnitine 14:0	Lipid	AcylCarnitine 14:0	-6.60102	-6.455	-6.35296	0.55	(0.5 - 0.61)	0.146012	0.0181823	0.104517	0.6	(0.54 - 0.67)	0.248056	0.00299426	0.0197987		*		*
PI 36:2	Lipid	PI 36:2	1.27404	1.37295	1.45877	0.55	(0.5 - 0.6)	0.0989115	0.0437135	0.184689	0.6	(0.54 - 0.67)	0.184733	0.00242749	0.0169523		*
SL010378	Protein	RET	10.3212	10.2266	10.1507	0.55	(0.5 - 0.6)	-0.0945883	0.0438473	0.184753	0.6	(0.53 - 0.67)	-0.170501	0.00492586	0.0295202		*
SL006544	Protein	TGFBI	15.0803	15.033	14.9878	0.55	(0.5 - 0.6)	-0.0473241	0.0749825	0.267343	0.6	(0.53 - 0.67)	-0.0925249	0.00333631	0.0218541		*
SL007327	Protein	OLR1	11.2659	11.3334	11.4194	0.55	(0.49 - 0.6)	0.0674435	0.220237	0.467001	0.6	(0.53 - 0.66)	0.153519	0.0233944	0.0952688
SL000516	Protein	CCL7	9.48825	9.56615	9.64761	0.55	(0.5 - 0.6)	0.0779009	0.13909	0.366711	0.6	(0.53 - 0.67)	0.159358	0.0280889	0.108877			*	*
SL014270	Protein	CD300C	12.1223	12.1861	12.2687	0.55	(0.49 - 0.6)	0.0638445	0.109337	0.317198	0.6	(0.53 - 0.66)	0.146462	0.00534505	0.0309354		*	*	*
SL010516	Protein	SRC	14.7816	14.6689	14.4798	0.55	(0.49 - 0.6)	-0.112704	0.178575	0.423864	0.6	(0.54 - 0.67)	-0.301773	0.00496195	0.0295981		*
PE 37:4	Lipid	PE 37:4	-4.71551	-4.61538	-4.50695	0.54	(0.49 - 0.6)	0.100138	0.0739181	0.264105	0.6	(0.53 - 0.66)	0.208569	0.00274041	0.0185995		*	*	*
SL000459	Protein	IGHA1 IGHA2	12.0767	12.1755	12.312	0.54	(0.48 - 0.59)	0.0987984	0.110323	0.317867	0.6	(0.54 - 0.67)	0.235288	0.00206528	0.0148944		*	*	*
SL004843	Protein	EFNA2	10.0977	10.1517	10.2285	0.54	(0.49 - 0.59)	0.0540416	0.0870837	0.290279	0.6	(0.53 - 0.67)	0.130876	0.00478207	0.0288632		*
SL010610	Protein	CD207	7.58786	7.5794	7.50477	0.54	(0.49 - 0.59)	-0.00845791	0.823672	0.91459	0.6	(0.53 - 0.66)	-0.083082	0.0186241	0.0795386
SL000451	Protein	HSPA1A	13.1191	13.1736	13.2469	0.54	(0.48 - 0.59)	0.0544603	0.105311	0.313632	0.6	(0.53 - 0.66)	0.127726	0.00207733	0.0148944		*	*	*
SL001999	Protein	MDM2	7.57834	7.55355	7.54222	0.54	(0.49 - 0.6)	-0.0247893	0.405412	0.638534	0.6	(0.54 - 0.67)	-0.036124	0.442782	0.63864
SL014069	Protein	PCSK7	10.2407	10.1849	10.0899	0.54	(0.48 - 0.59)	-0.0558121	0.17349	0.418256	0.6	(0.53 - 0.66)	-0.150814	0.00570963	0.0324372		*
SL012395	Protein	NTN1	9.1052	9.21239	9.32794	0.54	(0.49 - 0.6)	0.107183	0.0278197	0.139098	0.6	(0.54 - 0.67)	0.222737	0.00163245	0.0123715		*
Cer(d18:1/16:0)	Lipid	Cer(d18:1/16:0)	-5.36935	-5.30727	-5.21805	0.53	(0.48 - 0.59)	0.0620796	0.123069	0.337641	0.6	(0.53 - 0.66)	0.151298	0.00397593	0.025166		*
SL005256	Protein	HIST1H1C	10.1929	10.3187	10.4508	0.53	(0.48 - 0.59)	0.125756	0.122999	0.337641	0.6	(0.54 - 0.67)	0.257832	0.0178543	0.0773685			*	*
SL002528	Protein	PLA2G2A	11.8055	11.8294	11.9971	0.52	(0.46 - 0.57)	0.0238886	0.723961	0.862831	0.6	(0.54 - 0.67)	0.191559	0.0256969	0.100995
SL006268	Protein	NSFL1C	8.45054	8.70069	8.66805	0.61	(0.55 - 0.66)	0.250153	0.000136893	0.00390433	0.59	(0.53 - 0.66)	0.21751	0.0118648	0.0560098	*		*
SL004804	Protein	CADM3	10.3563	10.4501	10.4914	0.59	(0.53 - 0.64)	0.0937804	0.00870119	0.0653556	0.59	(0.53 - 0.66)	0.135082	0.00862168	0.0451103		*	*
SL004814	Protein	COTL1	11.0573	11.1507	11.1279	0.59	(0.54 - 0.65)	0.0934201	0.00466637	0.0443043	0.59	(0.52 - 0.66)	0.0705511	0.0629025	0.184238	*		*
SL000339	Protein	CA2	8.12793	8.03482	8.07522	0.59	(0.53 - 0.64)	-0.0931046	0.166261	0.410792	0.59	(0.53 - 0.66)	-0.0527094	0.563059	0.730852
SL001721	Protein	PECAM1	9.94414	9.92594	9.90313	0.58	(0.53 - 0.63)	-0.0181991	0.272788	0.520043	0.59	(0.53 - 0.66)	-0.0410108	0.00849198	0.0448483		*
SL000496	Protein	LTF	15.5265	15.3565	15.3485	0.58	(0.53 - 0.63)	-0.169984	0.00308645	0.0336196	0.59	(0.52 - 0.65)	-0.177953	0.012124	0.0569704	*		*
SL002541	Protein	TNFSF11	9.08078	9.00804	9.01112	0.58	(0.53 - 0.63)	-0.0727418	0.091005	0.294633	0.59	(0.53 - 0.66)	-0.0696636	0.240439	0.444089
SL010454	Protein	CNTN4	11.9124	11.8266	11.8136	0.58	(0.53 - 0.64)	-0.0858027	0.00156919	0.0201865	0.59	(0.53 - 0.66)	-0.0987613	0.00418172	0.0261857	*	*	*
SL008590	Protein	OLFM4	7.40781	7.35483	7.37464	0.58	(0.53 - 0.63)	-0.0529782	0.250622	0.499471	0.59	(0.52 - 0.66)	-0.0331716	0.701615	0.83209
SL001737	Protein	SFN	9.61492	9.6882	9.67969	0.58	(0.53 - 0.63)	0.0732757	0.00345707	0.0362719	0.59	(0.52 - 0.65)	0.0647662	0.0235219	0.0955576	*
SL005200	Protein	MICB	9.91893	10.0226	10.0396	0.58	(0.53 - 0.64)	0.103639	0.136674	0.362329	0.59	(0.53 - 0.66)	0.120705	0.145242	0.31728			*
SL005223	Protein	IL27RA	10.395	10.3126	10.32	0.58	(0.53 - 0.64)	-0.0823693	0.0186996	0.106048	0.59	(0.52 - 0.65)	-0.0750346	0.109875	0.265436
SL004733	Protein	LRP1	10.4614	10.5718	10.6012	0.58	(0.52 - 0.63)	0.110361	0.0290486	0.143544	0.59	(0.52 - 0.66)	0.13977	0.033366	0.121789
LPE(P-16:0)	Lipid	LPE(P-16:0)	-5.99374	-5.87304	-5.86913	0.57	(0.52 - 0.62)	0.120699	0.0188141	0.106341	0.59	(0.52 - 0.65)	0.124607	0.0588392	0.175067
S1P (d18:0)	Lipid	S1P (d18:0)	-7.77824	-7.62941	-7.60348	0.57	(0.52 - 0.63)	0.148834	0.00364311	0.0372027	0.59	(0.52 - 0.65)	0.174758	0.0047527	0.028829	*	*
SM 44:2	Lipid	SM 44:2	-5.96043	-6.07191	-6.1018	0.57	(0.51 - 0.62)	-0.111482	0.0146013	0.0930918	0.59	(0.52 - 0.65)	-0.141366	0.0147404	0.0665248
SL003774	Protein	BCL2L2	9.36294	9.44811	9.44698	0.57	(0.52 - 0.63)	0.0851699	0.0120103	0.080866	0.59	(0.53 - 0.66)	0.0840407	0.0338991	0.122676
SL000276	Protein	APOE	15.2727	15.1095	15.0471	0.57	(0.51 - 0.62)	-0.163251	0.00568535	0.0513809	0.59	(0.52 - 0.65)	-0.225665	0.00497389	0.0295981		*
SL000133	Protein	CCL20	7.52195	7.40377	7.40511	0.57	(0.52 - 0.63)	-0.118174	0.0314256	0.149183	0.59	(0.52 - 0.66)	-0.116834	0.0714394	0.200886
SL004588	Protein	IL1RAP	14.7961	14.6822	14.6429	0.57	(0.52 - 0.62)	-0.113915	0.0101755	0.0721471	0.59	(0.52 - 0.66)	-0.153246	0.00499307	0.029608		*	*
SL007673	Protein	NTN4	9.69314	9.61984	9.59815	0.57	(0.52 - 0.63)	-0.0732963	0.00973209	0.0699882	0.59	(0.53 - 0.66)	-0.0949861	0.00293361	0.0195189		*
SL006892	Protein	ABL1	7.30066	7.22834	7.20487	0.57	(0.52 - 0.63)	-0.0723191	0.0846649	0.287317	0.59	(0.53 - 0.66)	-0.095794	0.040002	0.136491
SL004137	Protein	EPHA1	12.4998	12.6441	12.6657	0.57	(0.52 - 0.63)	0.144276	0.0236872	0.12549	0.59	(0.53 - 0.66)	0.165848	0.0501549	0.158485
SL002075	Protein	IFNA2	7.236	7.20711	7.20511	0.57	(0.51 - 0.62)	-0.0288838	0.224667	0.472249	0.59	(0.52 - 0.65)	-0.030888	0.401229	0.604347
SL000508	Protein	LTA LTB	11.1946	11.113	11.0831	0.57	(0.52 - 0.63)	-0.0815293	0.0185761	0.105702	0.59	(0.52 - 0.66)	-0.111417	0.00869994	0.0453244		*
SL004120	Protein	DDR2	10.8653	10.9405	10.9262	0.57	(0.52 - 0.62)	0.0752163	0.0841564	0.286165	0.59	(0.53 - 0.66)	0.0609591	0.170084	0.353122			*	*
SL003990	Protein	FGFR2	8.25201	8.15821	8.12923	0.57	(0.52 - 0.63)	-0.0938013	0.11598	0.325705	0.59	(0.53 - 0.66)	-0.122783	0.0894689	0.232467
SL014028	Protein	ENTPD5	12.006	11.9069	11.8821	0.57	(0.52 - 0.63)	-0.0991004	0.000747128	0.0123789	0.59	(0.52 - 0.65)	-0.123881	0.00209972	0.0149727	*	*	*
SL008085	Protein	HIBADH	9.50584	9.37558	9.33747	0.57	(0.51 - 0.62)	-0.130263	0.0557712	0.221252	0.59	(0.53 - 0.66)	-0.168373	0.0264171	0.103106
SL016128	Protein	TXNDC12	11.452	11.3577	11.3404	0.57	(0.52 - 0.63)	-0.0942278	0.00626196	0.0548327	0.59	(0.52 - 0.65)	-0.111577	0.00948479	0.0477679		*	*	*
SL003685	Protein	NAMPT	10.4444	10.3027	10.249	0.57	(0.52 - 0.62)	-0.141781	0.0355052	0.160868	0.59	(0.52 - 0.65)	-0.195438	0.0179271	0.0774855
SL014228	Protein	SLAMF6	8.75913	8.8533	8.87177	0.57	(0.52 - 0.62)	0.0941733	0.0283596	0.140964	0.59	(0.53 - 0.66)	0.112646	0.0244346	0.0973926
PI 38:6	Lipid	PI 38:6	-3.67235	-3.53683	-3.47446	0.56	(0.51 - 0.62)	0.135521	0.0291794	0.14377	0.59	(0.52 - 0.65)	0.197894	0.0107904	0.0524019
TG 58:10	Lipid	TG 58:10	-4.45534	-4.75858	-4.90333	0.56	(0.51 - 0.62)	-0.303233	0.0175368	0.103626	0.59	(0.52 - 0.65)	-0.447985	0.00853645	0.0449427		*
SL000324	Protein	C8A C8B C8G	11.8249	11.7605	11.7295	0.56	(0.51 - 0.61)	-0.0643677	0.0509256	0.205895	0.59	(0.53 - 0.66)	-0.0953545	0.0252174	0.0993413
SL004305	Protein	TOP1	9.15753	9.13747	9.10139	0.56	(0.51 - 0.62)	-0.0200581	0.664029	0.830473	0.59	(0.52 - 0.65)	-0.0561396	0.306044	0.514129
SL004668	Protein	APOE	17.7957	17.708	17.6688	0.56	(0.51 - 0.61)	-0.0877007	0.00591019	0.0522943	0.59	(0.52 - 0.65)	-0.12687	0.00492208	0.0295202		*
SL004669	Protein	APOE	17.9232	17.8506	17.8165	0.56	(0.51 - 0.61)	-0.0726002	0.00704082	0.0583284	0.59	(0.52 - 0.66)	-0.106711	0.00532792	0.0309354		*
SL004063	Protein	FGFR3	9.84963	9.79706	9.79868	0.56	(0.51 - 0.62)	-0.0525667	0.242808	0.492168	0.59	(0.52 - 0.65)	-0.0509512	0.467553	0.658573
SL000493	Protein	LDHB	10.2245	10.3187	10.3889	0.56	(0.51 - 0.61)	0.0941324	0.034434	0.157587	0.59	(0.53 - 0.66)	0.164384	0.00505068	0.0298449		*
SL003104	Protein	CCL24	8.34237	8.33089	8.3415	0.56	(0.5 - 0.61)	-0.0114798	0.784411	0.897414	0.59	(0.52 - 0.66)	-0.000872506	0.989787	0.994145
SL004146	Protein	IL1RL1	12.0036	12.1304	12.2143	0.56	(0.51 - 0.62)	0.126807	0.0301944	0.145971	0.59	(0.52 - 0.66)	0.210732	0.00528951	0.0309354		*		*
SL001691	Protein	FGF7	10.7599	10.8374	10.8726	0.56	(0.51 - 0.62)	0.0774983	0.0181468	0.104517	0.59	(0.52 - 0.65)	0.112672	0.00759667	0.0408866		*
SL000003	Protein	ANG	11.7399	11.8078	11.8607	0.56	(0.5 - 0.61)	0.0679126	0.0327962	0.152688	0.59	(0.53 - 0.66)	0.120804	0.00299909	0.0197987		*
SL000433	Protein	GCG	11.6801	11.828	11.8884	0.56	(0.51 - 0.62)	0.14795	0.059736	0.229963	0.59	(0.52 - 0.65)	0.208303	0.0446803	0.146163
SL010388	Protein	PRSS2	11.7633	11.9532	12.0454	0.56	(0.5 - 0.61)	0.189921	0.00692867	0.0583284	0.59	(0.52 - 0.66)	0.282129	0.00425045	0.0264091		*	*	*
SL007774	Protein	JAG2	8.67225	8.52894	8.46579	0.56	(0.51 - 0.61)	-0.143309	0.0407612	0.174396	0.59	(0.53 - 0.66)	-0.206457	0.00874305	0.0453244		*
SL014288	Protein	CD200R1	9.96285	9.92668	9.88289	0.56	(0.51 - 0.61)	-0.0361703	0.309585	0.557187	0.59	(0.52 - 0.66)	-0.0799576	0.071108	0.200886
SL000084	Protein	EGF	9.16137	9.02401	8.97312	0.56	(0.5 - 0.61)	-0.137351	0.0013398	0.0185595	0.59	(0.53 - 0.66)	-0.188243	0.000402672	0.00402021	*	*
SL004230	Protein	MAPT	7.71488	7.58404	7.58787	0.56	(0.51 - 0.62)	-0.130841	0.0298996	0.145621	0.59	(0.52 - 0.66)	-0.127011	0.085904	0.226398
PE 36:4	Lipid	PE 36:4	-0.509259	-0.373398	-0.283694	0.55	(0.5 - 0.61)	0.13586	0.0347405	0.158252	0.59	(0.52 - 0.66)	0.225565	0.00580706	0.0328225		*
PE 36:5	Lipid	PE 36:5	-3.71857	-3.57513	-3.40824	0.55	(0.49 - 0.6)	0.14344	0.104495	0.313632	0.59	(0.52 - 0.66)	0.310336	0.00475934	0.028829		*
SL004396	Protein	STAT1	13.1046	13.2772	13.3628	0.55	(0.5 - 0.61)	0.172587	0.0205674	0.113221	0.59	(0.53 - 0.66)	0.258219	0.00632639	0.0352858		*
SL017128	Protein	LRRK2	11.2868	11.2622	11.2389	0.55	(0.5 - 0.61)	-0.0246619	0.329727	0.571527	0.59	(0.53 - 0.66)	-0.0479092	0.172064	0.356358
SL000456	Protein	C3	14.5661	14.4977	14.4341	0.55	(0.5 - 0.6)	-0.0683379	0.243515	0.492168	0.59	(0.52 - 0.66)	-0.131958	0.0783952	0.214382
SL005206	Protein	NCR2	8.24792	8.2315	8.22095	0.55	(0.5 - 0.61)	-0.0164183	0.467691	0.689793	0.59	(0.53 - 0.66)	-0.0269612	0.423903	0.625685
SL010464	Protein	LRIG3	12.5506	12.5006	12.4567	0.55	(0.5 - 0.61)	-0.0500081	0.0720618	0.259668	0.59	(0.52 - 0.65)	-0.0938985	0.00729553	0.0393912		*
SL002755	Protein	PAPPA	14.1585	14.2771	14.3546	0.55	(0.5 - 0.61)	0.118583	0.0574187	0.224591	0.59	(0.52 - 0.65)	0.196054	0.0126463	0.0587148
SL018548	Protein	SERPINA3	12.9595	13.0377	13.0894	0.55	(0.49 - 0.6)	0.0781239	0.064326	0.23998	0.59	(0.53 - 0.66)	0.129898	0.0222521	0.0917219
SL012168	Protein	LIN7B	8.70812	8.65862	8.64447	0.55	(0.5 - 0.61)	-0.049503	0.0161896	0.0991323	0.59	(0.52 - 0.66)	-0.0636556	0.0147614	0.0665248
SL008380	Protein	CTSZ	12.3131	12.3786	12.4294	0.55	(0.49 - 0.6)	0.0654676	0.0596081	0.229963	0.59	(0.52 - 0.66)	0.116234	0.00995713	0.0490599		*		*
SL008414	Protein	EPHB6	10.6589	10.7322	10.7931	0.55	(0.5 - 0.6)	0.0733343	0.00772744	0.0627854	0.59	(0.52 - 0.66)	0.13417	0.0013692	0.0104703		*	*	*
SL005725	Protein	GRAP2	9.07572	8.98953	8.94746	0.55	(0.5 - 0.61)	-0.0861963	0.0513752	0.207217	0.59	(0.52 - 0.66)	-0.128262	0.0122646	0.0572576
SL004871	Protein	TNFRSF21	13.0027	13.062	13.113	0.55	(0.5 - 0.6)	0.0593312	0.0320294	0.15085	0.59	(0.52 - 0.66)	0.110343	0.00515947	0.0303815		*	*
SL000408	Protein	EPO	10.1121	10.2389	10.3184	0.55	(0.5 - 0.6)	0.126811	0.0600426	0.230618	0.59	(0.52 - 0.66)	0.206267	0.0237696	0.0961622			*
PC 40:6	Lipid	PC 40:6	-2.23277	-2.29694	-2.40077	0.54	(0.48 - 0.59)	-0.0641674	0.216429	0.462993	0.59	(0.52 - 0.66)	-0.168	0.0128973	0.0593605
PC(P-32:0)	Lipid	PC(P-32:0)	-6.50605	-6.44153	-6.37435	0.54	(0.48 - 0.59)	0.0645189	0.0895182	0.292281	0.59	(0.52 - 0.65)	0.131701	0.00617501	0.0346703		*
PC(P-32:1)	Lipid	PC(P-32:1)	-9.31803	-9.21511	-9.08192	0.54	(0.48 - 0.59)	0.102913	0.105098	0.313632	0.59	(0.52 - 0.66)	0.236109	0.00458979	0.0283093		*
SL000427	Protein	CX3CL1	11.6109	11.6759	11.7478	0.54	(0.48 - 0.59)	0.0649631	0.150229	0.385261	0.59	(0.52 - 0.66)	0.136881	0.015833	0.0698635
SL008609	Protein	FCGR3B	10.6412	10.7068	10.7744	0.54	(0.49 - 0.59)	0.0656612	0.104864	0.313632	0.59	(0.52 - 0.66)	0.133205	0.0123	0.0572643
SL010381	Protein	DKKL1	11.9167	11.8825	11.8305	0.54	(0.48 - 0.59)	-0.0341318	0.181966	0.429239	0.59	(0.52 - 0.65)	-0.086198	0.0105176	0.051372
SL005161	Protein	FGF12	7.75566	7.70391	7.66602	0.54	(0.48 - 0.59)	-0.0517544	0.0758136	0.267484	0.59	(0.52 - 0.65)	-0.0896421	0.00571969	0.0324372		*
SL014096	Protein	LRRTM1	6.89762	6.93355	6.82549	0.54	(0.48 - 0.59)	0.0359238	0.47356	0.693572	0.59	(0.52 - 0.65)	-0.0721375	0.0993362	0.248708
SL011499	Protein	PPY	12.1809	12.3745	12.4937	0.54	(0.49 - 0.6)	0.193663	0.0339802	0.156476	0.59	(0.52 - 0.65)	0.312863	0.00461911	0.0283865		*	*	*
SL003728	Protein	BIRC3	8.01253	7.91612	7.86422	0.54	(0.49 - 0.6)	-0.0964132	0.0942465	0.300522	0.59	(0.52 - 0.66)	-0.148312	0.0200641	0.0833127
SL006970	Protein	DLL1	11.118	11.1804	11.2474	0.54	(0.48 - 0.59)	0.0623809	0.0597122	0.229963	0.59	(0.53 - 0.66)	0.129384	0.00680754	0.0372322		*	*	*
SL006230	Protein	LUM	10.5187	10.5477	10.6175	0.53	(0.48 - 0.59)	0.0289161	0.296453	0.546103	0.59	(0.52 - 0.66)	0.0987483	0.00949706	0.0477679		*
SL004626	Protein	ADAMTS5	8.69919	8.72961	8.82272	0.53	(0.47 - 0.58)	0.0304211	0.402923	0.635798	0.59	(0.53 - 0.66)	0.123533	0.016368	0.0718494			*	*
SL005183	Protein	IL22RA2	10.9745	10.8994	10.798	0.53	(0.48 - 0.58)	-0.0751081	0.113958	0.322595	0.59	(0.52 - 0.66)	-0.176537	0.0041652	0.0261857		*
SL003690	Protein	TNFRSF11A	10.5262	10.5823	10.6469	0.53	(0.48 - 0.58)	0.0561146	0.13554	0.360728	0.59	(0.52 - 0.65)	0.120747	0.0252135	0.0993413
SL000658	Protein	GAS1	9.53454	9.56807	9.647	0.53	(0.47 - 0.58)	0.0335281	0.252047	0.500416	0.59	(0.52 - 0.66)	0.112451	0.00861494	0.0451103		*		*
SL000011	Protein	AFP	9.54721	9.61317	9.68422	0.53	(0.48 - 0.58)	0.0659563	0.0702685	0.256487	0.59	(0.52 - 0.65)	0.137004	0.0114115	0.0546328
SL008094	Protein	PGM1	9.81694	9.8847	9.93573	0.53	(0.47 - 0.58)	0.0677581	0.22339	0.470953	0.59	(0.52 - 0.65)	0.118789	0.0988848	0.248314
SL000616	Protein	VTN	15.9024	15.8658	15.7596	0.52	(0.46 - 0.57)	-0.0366362	0.428509	0.660748	0.59	(0.52 - 0.65)	-0.142769	0.0168141	0.0732369
SL004783	Protein	S100A12	9.72294	9.78604	9.88712	0.52	(0.47 - 0.57)	0.0630991	0.325283	0.567316	0.59	(0.52 - 0.65)	0.164179	0.041358	0.139511
SL000478	Protein	IL2	10.4049	10.5804	10.5269	0.6	(0.55 - 0.65)	0.175568	0.000802554	0.0125183	0.58	(0.5 - 0.65)	0.12209	0.0769063	0.21168	*		*
SL010449	Protein	CA10	9.40343	9.33718	9.34517	0.6	(0.54 - 0.65)	-0.0662474	0.00539797	0.0496474	0.58	(0.52 - 0.65)	-0.058262	0.0601266	0.177958	*
SL004726	Protein	CD97	10.7325	10.659	10.6785	0.59	(0.53 - 0.64)	-0.0735064	0.00897802	0.0661549	0.58	(0.51 - 0.65)	-0.054005	0.129973	0.295631
SL010369	Protein	CA4	10.9044	10.8005	10.8085	0.59	(0.53 - 0.64)	-0.103901	0.014305	0.0926261	0.58	(0.51 - 0.64)	-0.0958569	0.0649129	0.188169
SL010496	Protein	CDK5 CDK5R1	10.2337	10.1752	10.1818	0.59	(0.53 - 0.64)	-0.0585215	0.029574	0.144451	0.58	(0.52 - 0.65)	-0.0519093	0.125975	0.288871
SL010513	Protein	PRKACA	10.234	10.5537	10.515	0.59	(0.54 - 0.64)	0.319714	0.000603688	0.0107393	0.58	(0.51 - 0.65)	0.281017	0.0194199	0.0818445	*		*
SL004064	Protein	PLA2G1B	9.56264	9.68607	9.68639	0.59	(0.54 - 0.64)	0.123433	0.00588125	0.0522943	0.58	(0.51 - 0.65)	0.12375	0.0323655	0.118908			*
SL004924	Protein	EIF4H	11.7872	12.1487	12.1154	0.59	(0.54 - 0.64)	0.361519	0.000731754	0.0122442	0.58	(0.51 - 0.64)	0.328277	0.0155423	0.0693046	*
SL001731	Protein	ENO2	14.8742	15.0354	15.0095	0.58	(0.52 - 0.63)	0.161197	0.00302829	0.0332325	0.58	(0.51 - 0.64)	0.135312	0.0456428	0.148625	*
SL009328	Protein	CSH1 CSH2	11.0835	11.1272	11.1209	0.58	(0.52 - 0.63)	0.0437011	0.356148	0.592412	0.58	(0.51 - 0.64)	0.0373906	0.482811	0.670542
SL004128	Protein	ACVR1B	8.01201	7.93275	7.93322	0.58	(0.52 - 0.63)	-0.0792668	0.0646318	0.24059	0.58	(0.51 - 0.64)	-0.0787915	0.10017	0.250055
SL004861	Protein	IL18RAP	8.23686	8.11527	8.10527	0.58	(0.53 - 0.63)	-0.121597	0.000516855	0.0094944	0.58	(0.51 - 0.64)	-0.131594	0.000289922	0.00318161	*	*	*	*
SL010520	Protein	AURKB	9.57046	9.51372	9.50684	0.58	(0.52 - 0.63)	-0.0567424	0.0260255	0.132471	0.58	(0.52 - 0.65)	-0.0636234	0.0386931	0.134123
SL004908	Protein	TPM2	10.9309	10.8581	10.856	0.58	(0.52 - 0.63)	-0.0728213	0.0321299	0.15085	0.58	(0.51 - 0.64)	-0.0748741	0.0804351	0.217172
SL004605	Protein	RPSA	10.8866	10.9695	10.9217	0.58	(0.53 - 0.64)	0.0828956	0.11216	0.319997	0.58	(0.51 - 0.64)	0.0350686	0.536907	0.707779
SL006993	Protein	MAPK13	9.44103	9.36325	9.36357	0.58	(0.52 - 0.63)	-0.0777892	0.0827172	0.28298	0.58	(0.51 - 0.64)	-0.0774672	0.167479	0.350296
SL008703	Protein	CPE	10.9168	10.8216	10.8444	0.58	(0.53 - 0.64)	-0.0952098	0.0149942	0.094177	0.58	(0.51 - 0.64)	-0.0723823	0.140864	0.310208
SL014684	Protein	OAS1	8.54639	8.46336	8.48361	0.57	(0.52 - 0.62)	-0.0830248	0.189176	0.435568	0.58	(0.51 - 0.65)	-0.0627755	0.464114	0.655814
SL003178	Protein	ICAM3	9.34245	9.3191	9.27985	0.57	(0.52 - 0.62)	-0.0233425	0.465083	0.688861	0.58	(0.51 - 0.64)	-0.0625931	0.04739	0.153074
SL000530	Protein	OSM	10.855	10.8027	10.7916	0.57	(0.52 - 0.62)	-0.0522992	0.1088	0.317198	0.58	(0.51 - 0.65)	-0.0633933	0.103388	0.254703
SL005178	Protein	IL37	11.0429	10.992	10.9879	0.57	(0.52 - 0.63)	-0.0508996	0.0562582	0.222141	0.58	(0.51 - 0.65)	-0.0549454	0.102329	0.2532
SL011232	Protein	CDC37	9.11717	9.20979	9.22279	0.57	(0.52 - 0.62)	0.0926255	0.0374559	0.16702	0.58	(0.52 - 0.65)	0.105624	0.0512881	0.160811
SL013548	Protein	IL34	9.40241	9.3575	9.3552	0.57	(0.52 - 0.63)	-0.0449094	0.0936726	0.299823	0.58	(0.51 - 0.65)	-0.0472102	0.22158	0.422346
SL007281	Protein	MAPK12	9.92287	10.062	10.0562	0.57	(0.52 - 0.63)	0.139104	0.00312324	0.0336196	0.58	(0.51 - 0.64)	0.13335	0.0385318	0.133989	*
SL014294	Protein	EPHA10	8.68797	8.64248	8.64663	0.57	(0.52 - 0.62)	-0.0454883	0.297457	0.546416	0.58	(0.51 - 0.64)	-0.041339	0.535378	0.706314
SL010471	Protein	SPOCK2	9.74314	9.65387	9.62163	0.57	(0.52 - 0.63)	-0.089274	0.00576018	0.0515064	0.58	(0.52 - 0.65)	-0.12151	0.00532613	0.0309354		*
SL004297	Protein	NRG1	7.7939	7.6348	7.61712	0.57	(0.52 - 0.62)	-0.159103	0.00836413	0.0645306	0.58	(0.52 - 0.65)	-0.176787	0.0117784	0.0557576
PE(O-36:4)	Lipid	PE(O-36:4)	-3.44851	-3.63046	-3.69617	0.56	(0.51 - 0.62)	-0.181946	0.0156316	0.0967669	0.58	(0.52 - 0.65)	-0.247658	0.00624786	0.0349632		*		*
PE(O-38:6)	Lipid	PE(O-38:6)	-3.69795	-3.8399	-3.88814	0.56	(0.51 - 0.61)	-0.141944	0.0121934	0.08145	0.58	(0.52 - 0.65)	-0.19019	0.00418352	0.0261857		*
PE(O-40:7)	Lipid	PE(O-40:7)	-5.45656	-5.59264	-5.64338	0.56	(0.51 - 0.61)	-0.136081	0.0349259	0.158669	0.58	(0.52 - 0.65)	-0.186824	0.0143536	0.0650337
SM 44:1	Lipid	SM 44:1	-7.99695	-8.08966	-8.12863	0.56	(0.5 - 0.61)	-0.092705	0.0232807	0.124115	0.58	(0.51 - 0.65)	-0.131673	0.0100988	0.0496135		*
TG 56:7	Lipid	TG 56:7	-5.30226	-5.4902	-5.58483	0.56	(0.51 - 0.61)	-0.187935	0.0310184	0.148502	0.58	(0.52 - 0.65)	-0.282569	0.00936197	0.0474134		*
SL003334	Protein	AIMP1	11.7609	11.7164	11.7084	0.56	(0.51 - 0.62)	-0.0445225	0.094677	0.30076	0.58	(0.51 - 0.64)	-0.0524583	0.141157	0.310208
SL003200	Protein	TEK	10.8153	10.7541	10.7142	0.56	(0.51 - 0.62)	-0.0611868	0.107142	0.315649	0.58	(0.51 - 0.65)	-0.101063	0.0087242	0.0453244		*
SL000540	Protein	PLG	9.40929	9.38024	9.36855	0.56	(0.51 - 0.62)	-0.029051	0.336912	0.575132	0.58	(0.51 - 0.65)	-0.0407397	0.277713	0.485821
SL000613	Protein	PLAU	10.9622	10.9072	10.8893	0.56	(0.5 - 0.61)	-0.0549933	0.116165	0.325705	0.58	(0.51 - 0.64)	-0.0729291	0.0956284	0.242661
SL014093	Protein	ENTPD3	10.1252	10.0853	10.0738	0.56	(0.51 - 0.61)	-0.0399891	0.110595	0.317867	0.58	(0.52 - 0.65)	-0.0514129	0.0566352	0.171827
SL014029	Protein	SPHK2	9.04966	9.03414	9.01344	0.56	(0.5 - 0.61)	-0.0155149	0.6148	0.797475	0.58	(0.51 - 0.65)	-0.036216	0.350831	0.55673
SL000308	Protein	SERPING1	12.9846	12.9277	12.8819	0.56	(0.5 - 0.61)	-0.056907	0.110573	0.317867	0.58	(0.51 - 0.64)	-0.102753	0.0191303	0.081028
SL004253	Protein	HSD17B1	11.0088	10.9193	10.8826	0.56	(0.5 - 0.61)	-0.0894773	0.121187	0.335197	0.58	(0.52 - 0.65)	-0.12625	0.0443079	0.146012
SL004782	Protein	TNFAIP6	10.2876	10.3727	10.3925	0.56	(0.51 - 0.62)	0.08507	0.0288887	0.143173	0.58	(0.51 - 0.64)	0.104926	0.0383171	0.133517
SL004852	Protein	CD274	10.0534	10.1345	10.1711	0.56	(0.5 - 0.61)	0.0810969	0.312271	0.558205	0.58	(0.51 - 0.65)	0.117776	0.20844	0.408185
SL000344	Protein	CTSD	9.67957	9.74045	9.78645	0.56	(0.51 - 0.61)	0.0608713	0.254985	0.504595	0.58	(0.51 - 0.64)	0.106877	0.118005	0.276983
SL000458	Protein	IFNGR1	8.68644	8.7527	8.77067	0.56	(0.51 - 0.61)	0.0662548	0.133352	0.357006	0.58	(0.51 - 0.64)	0.0842239	0.108207	0.262367
SL000598	Protein	THPO	7.93281	8.04721	8.10759	0.56	(0.51 - 0.61)	0.114404	0.0211548	0.115626	0.58	(0.51 - 0.65)	0.174786	0.0224376	0.0922619			*
SL013165	Protein	HMGN1	9.57906	9.53298	9.49893	0.56	(0.51 - 0.62)	-0.0460775	0.293889	0.543601	0.58	(0.51 - 0.65)	-0.0801333	0.171575	0.355782
SL018887	Protein	CRYZL1	10.8907	10.7687	10.7405	0.56	(0.5 - 0.61)	-0.121986	0.0404995	0.173716	0.58	(0.51 - 0.64)	-0.150231	0.0542028	0.166854
CE 20:4	Lipid	CE 20:4	0.244709	0.122296	0.0723488	0.55	(0.5 - 0.61)	-0.122413	0.0239526	0.126105	0.58	(0.51 - 0.64)	-0.17236	0.015687	0.0697527
Hex1Cer(d18:1/16:0)	Lipid	Hex1Cer(d18:1/16:0)	-5.63392	-5.53449	-5.47393	0.55	(0.49 - 0.6)	0.0994261	0.0320411	0.15085	0.58	(0.51 - 0.64)	0.15999	0.00805152	0.0427895		*
PC 40:7	Lipid	PC 40:7	-3.71838	-3.77304	-3.83552	0.55	(0.5 - 0.61)	-0.0546634	0.257721	0.505384	0.58	(0.52 - 0.65)	-0.117144	0.0536349	0.166013
PC(O-38:5)	Lipid	PC(O-38:5)	-3.44477	-3.50139	-3.5249	0.55	(0.5 - 0.61)	-0.0566162	0.107507	0.315978	0.58	(0.51 - 0.65)	-0.0801349	0.0918641	0.235585
PE(P-20:0/18:2)	Lipid	PE(P-20:0/18:2)	-4.85233	-4.74263	-4.66102	0.55	(0.49 - 0.6)	0.109702	0.0951071	0.300994	0.58	(0.51 - 0.65)	0.191311	0.0180917	0.0779973
SL004342	Protein	FGF8	9.62249	9.62685	9.64143	0.55	(0.5 - 0.6)	0.00436523	0.892085	0.951182	0.58	(0.51 - 0.65)	0.0189448	0.732364	0.85612
SL010372	Protein	TMPRSS15	8.25545	8.17005	8.16631	0.55	(0.5 - 0.61)	-0.085409	0.0167096	0.0998942	0.58	(0.52 - 0.65)	-0.0891424	0.0519952	0.162425
SL004868	Protein	CA7	8.46927	8.41604	8.39933	0.55	(0.5 - 0.61)	-0.0532267	0.167181	0.411861	0.58	(0.51 - 0.64)	-0.0699389	0.132422	0.298789
SL005263	Protein	LRPAP1	9.81551	9.73943	9.73847	0.55	(0.5 - 0.6)	-0.0760763	0.0985349	0.30611	0.58	(0.51 - 0.64)	-0.0770342	0.193457	0.383735
SL000588	Protein	TPO	10.8089	10.785	10.7626	0.55	(0.5 - 0.6)	-0.0239214	0.424818	0.657457	0.58	(0.51 - 0.64)	-0.0463608	0.191718	0.38118
SL003171	Protein	FGF4	7.77589	7.71611	7.68021	0.55	(0.49 - 0.6)	-0.0597738	0.109876	0.31742	0.58	(0.51 - 0.64)	-0.0956791	0.0359369	0.12786
SL001766	Protein	CGA CGB	10.8478	11.0875	11.2521	0.55	(0.5 - 0.6)	0.23976	0.133508	0.357006	0.58	(0.52 - 0.65)	0.404331	0.0392278	0.134955
SL008008	Protein	ARG1	9.69455	9.62773	9.5244	0.55	(0.5 - 0.61)	-0.0668201	0.329149	0.571527	0.58	(0.52 - 0.65)	-0.170148	0.0242214	0.096827
Cer(m18:2/16:0)	Lipid	Cer(m18:2/16:0)	-5.6416	-5.58164	-5.5231	0.54	(0.48 - 0.59)	0.0599668	0.133777	0.357162	0.58	(0.52 - 0.65)	0.118499	0.0196033	0.0819437
PC 30:0	Lipid	PC 30:0	-4.54011	-4.41806	-4.30039	0.54	(0.49 - 0.59)	0.122041	0.0880541	0.291114	0.58	(0.51 - 0.64)	0.239719	0.00937045	0.0474134		*
PE 36:1	Lipid	PE 36:1	-2.01187	-1.92191	-1.8243	0.54	(0.48 - 0.59)	0.0899626	0.235078	0.482366	0.58	(0.51 - 0.64)	0.187568	0.0425705	0.14303
PE 38:5	Lipid	PE 38:5	-0.9429	-0.851696	-0.746921	0.54	(0.49 - 0.59)	0.0912035	0.151746	0.38735	0.58	(0.51 - 0.64)	0.195979	0.0157666	0.0697527
PE(P-18:0/18:2)	Lipid	PE(P-18:0/18:2)	-2.34741	-2.27344	-2.1553	0.54	(0.48 - 0.59)	0.0739699	0.307809	0.556361	0.58	(0.52 - 0.65)	0.192103	0.0283107	0.109235
PE(P-18:1/22:6)	Lipid	PE(P-18:1/22:6)	-2.94206	-3.03302	-3.11594	0.54	(0.48 - 0.59)	-0.0909589	0.0920321	0.296821	0.58	(0.51 - 0.64)	-0.173878	0.00958032	0.0480438		*
PI 36:3	Lipid	PI 36:3	-2.33516	-2.26094	-2.18263	0.54	(0.48 - 0.59)	0.0742144	0.190838	0.43853	0.58	(0.51 - 0.64)	0.152523	0.0310772	0.115939
SM 37:1	Lipid	SM 37:1	-4.5567	-4.6121	-4.66322	0.54	(0.49 - 0.59)	-0.0553982	0.128759	0.349844	0.58	(0.52 - 0.65)	-0.106519	0.015417	0.0691105
SM 38:0	Lipid	SM 38:0	-6.84725	-6.91448	-6.98678	0.54	(0.48 - 0.59)	-0.0672347	0.197872	0.442315	0.58	(0.51 - 0.65)	-0.139533	0.0336296	0.122487
SM 40:0	Lipid	SM 40:0	-5.37667	-5.46019	-5.56393	0.54	(0.48 - 0.59)	-0.0835271	0.183203	0.429652	0.58	(0.52 - 0.65)	-0.187266	0.0160495	0.0706343
SL000441	Protein	HGF	10.5469	10.5995	10.6527	0.54	(0.48 - 0.59)	0.0526275	0.339338	0.575277	0.58	(0.51 - 0.64)	0.105806	0.120339	0.280018
SL004689	Protein	WISP1	12.4834	12.4452	12.4006	0.54	(0.49 - 0.59)	-0.0382069	0.193319	0.439247	0.58	(0.51 - 0.65)	-0.0828528	0.0305747	0.115338
SL003196	Protein	CCL17	10.8845	11.0111	11.1286	0.54	(0.48 - 0.59)	0.126585	0.116213	0.325705	0.58	(0.51 - 0.64)	0.244128	0.0196374	0.0819437
SL005491	Protein	OPCML	11.8672	11.8353	11.8142	0.54	(0.49 - 0.6)	-0.0318717	0.141443	0.369456	0.58	(0.51 - 0.65)	-0.0530618	0.0728301	0.203443
SL000483	Protein	IL7	7.36202	7.30864	7.29186	0.54	(0.48 - 0.59)	-0.0533741	0.117251	0.32706	0.58	(0.51 - 0.65)	-0.0701608	0.105401	0.258531
SL006523	Protein	MFGE8	10.4136	10.5076	10.5951	0.54	(0.49 - 0.59)	0.0939809	0.144167	0.373683	0.58	(0.51 - 0.65)	0.181545	0.0353539	0.126317
SL007179	Protein	EPHB2	14.1936	14.2478	14.3009	0.54	(0.49 - 0.6)	0.0542664	0.102062	0.310582	0.58	(0.51 - 0.64)	0.107316	0.0186868	0.0795483			*	*
SL005189	Protein	IL7R	8.2297	8.17531	8.19403	0.54	(0.49 - 0.59)	-0.0543829	0.262607	0.510122	0.58	(0.51 - 0.65)	-0.0356707	0.626576	0.773476
SL016563	Protein	SLC25A18	9.88311	9.86676	9.81583	0.54	(0.49 - 0.6)	-0.0163469	0.657187	0.826483	0.58	(0.51 - 0.65)	-0.0672737	0.0885584	0.230962
SL004891	Protein	HNRNPA2B1	11.8507	11.9413	11.987	0.54	(0.49 - 0.6)	0.0906046	0.0769738	0.269346	0.58	(0.51 - 0.64)	0.1363	0.0407983	0.138174
SL000485	Protein	IL9	8.05594	8.17156	8.22744	0.54	(0.49 - 0.59)	0.11562	0.0832074	0.283509	0.58	(0.51 - 0.64)	0.171498	0.0368452	0.129456
SL004683	Protein	NOG	11.3824	11.3494	11.3063	0.54	(0.49 - 0.59)	-0.03298	0.41376	0.644474	0.58	(0.51 - 0.65)	-0.0761581	0.146233	0.318881
PI 32:1	Lipid	PI 32:1	-4.63151	-4.49661	-4.30201	0.53	(0.47 - 0.58)	0.134898	0.205215	0.45335	0.58	(0.51 - 0.65)	0.329503	0.0134465	0.0614179
SL004827	Protein	S100A6	11.0806	11.0266	10.9258	0.53	(0.47 - 0.58)	-0.0540113	0.273332	0.520043	0.58	(0.51 - 0.64)	-0.154822	0.00935305	0.0474134		*
SL001897	Protein	SPINT2	9.88225	9.94242	10.0177	0.53	(0.48 - 0.58)	0.0601658	0.112283	0.319997	0.58	(0.51 - 0.64)	0.135451	0.00933312	0.0474134		*
SL003192	Protein	CFP	16.8456	16.8602	16.8173	0.53	(0.48 - 0.59)	0.01454	0.6573	0.826483	0.58	(0.51 - 0.64)	-0.028297	0.515255	0.691644
SL008909	Protein	LGMN	11.565	11.5448	11.504	0.53	(0.48 - 0.59)	-0.0201907	0.319571	0.563012	0.58	(0.51 - 0.65)	-0.0610388	0.0242354	0.096827
SL004867	Protein	CA3	11.3267	11.3992	11.535	0.53	(0.48 - 0.58)	0.0725301	0.279711	0.525819	0.58	(0.52 - 0.65)	0.208364	0.0129258	0.0593605			*	*
SL008360	Protein	FLRT2	14.2304	14.2639	14.3446	0.52	(0.47 - 0.58)	0.0335143	0.331168	0.571679	0.58	(0.52 - 0.65)	0.114217	0.00678103	0.0372076		*
SL007696	Protein	CD93	13.4817	13.5069	13.5704	0.52	(0.47 - 0.58)	0.0252565	0.381961	0.617127	0.58	(0.52 - 0.65)	0.0887379	0.0121694	0.0569704				*
SL008916	Protein	DPP7	10.6832	10.6836	10.6302	0.52	(0.47 - 0.58)	0.000439836	0.992931	0.995676	0.58	(0.51 - 0.64)	-0.0530121	0.333217	0.538973
SL000414	Protein	CFB	14.7526	14.7295	14.6829	0.52	(0.47 - 0.57)	-0.0230912	0.272601	0.520043	0.58	(0.51 - 0.65)	-0.0696716	0.00909169	0.046702		*
SL012822	Protein	PRSS22	10.7515	10.7728	10.8386	0.52	(0.47 - 0.58)	0.0212675	0.544918	0.747746	0.58	(0.51 - 0.65)	0.0871118	0.0460399	0.14963
SL014735	Protein	IMPDH1	10.9265	11.0299	11.1791	0.52	(0.47 - 0.57)	0.103408	0.148126	0.381083	0.58	(0.52 - 0.65)	0.252524	0.00767205	0.0411611		*
SL001902	Protein	BCAM	10.608	10.6022	10.6673	0.51	(0.46 - 0.57)	-0.00581772	0.873335	0.944902	0.58	(0.51 - 0.64)	0.0593795	0.147605	0.321046
SL003329	Protein	CCL14	13.1497	13.176	13.3065	0.5	(0.45 - 0.55)	0.0263455	0.577395	0.77629	0.58	(0.51 - 0.64)	0.156813	0.00923586	0.0472988		*
SL004149	Protein	IL13RA1	11.3175	11.3359	11.401	0.48	(0.43 - 0.54)	0.0183973	0.571808	0.77185	0.58	(0.51 - 0.64)	0.0835147	0.0365737	0.1294
SL005220	Protein	SHH	9.35236	9.27855	9.18178	0.48	(0.43 - 0.54)	-0.0738112	0.152138	0.38735	0.58	(0.51 - 0.64)	-0.17058	0.0105896	0.0515746
SL003220	Protein	C3	17.5746	17.5645	17.5203	0.48	(0.42 - 0.53)	-0.0101101	0.69405	0.84628	0.58	(0.51 - 0.64)	-0.054297	0.0903516	0.233509
SL004853	Protein	ICOSLG	11.0051	11.1897	11.1721	0.58	(0.52 - 0.63)	0.184589	0.00896828	0.0661549	0.57	(0.5 - 0.63)	0.166961	0.0703779	0.200233
SL004475	Protein	IFNAR1	10.2622	10.4084	10.4083	0.58	(0.53 - 0.63)	0.146254	0.00378077	0.0380327	0.57	(0.51 - 0.64)	0.146144	0.0309898	0.115869	*
PC 37:4	Lipid	PC 37:4	-4.64567	-4.75376	-4.77658	0.57	(0.52 - 0.62)	-0.108094	0.00825008	0.0642517	0.57	(0.51 - 0.64)	-0.130916	0.0137223	0.0623403
SL008372	Protein	FLRT3	11.7572	11.9007	11.9083	0.57	(0.52 - 0.62)	0.14348	0.007979	0.0637676	0.57	(0.51 - 0.64)	0.151089	0.0289716	0.111025
SL018629	Protein	RNF43	10.4279	10.3194	10.3035	0.57	(0.52 - 0.62)	-0.108463	0.0426604	0.181602	0.57	(0.51 - 0.64)	-0.124446	0.038822	0.134123
SL020171	Protein	HHLA2	9.97694	10.1573	10.1456	0.57	(0.52 - 0.62)	0.18032	0.000980162	0.0146459	0.57	(0.5 - 0.63)	0.168666	0.0392887	0.134955	*
SL003915	Protein	KLK8	11.2083	11.3408	11.3689	0.57	(0.52 - 0.62)	0.132473	0.00375508	0.0380005	0.57	(0.5 - 0.64)	0.160617	0.0103175	0.0505409	*
SL003793	Protein	MAP2K1	8.75719	8.77982	8.79615	0.57	(0.51 - 0.62)	0.0226345	0.375737	0.610573	0.57	(0.51 - 0.64)	0.0389592	0.235999	0.438283
SL002655	Protein	CTGF	10.4114	10.5395	10.5167	0.57	(0.52 - 0.62)	0.128178	0.00238921	0.0274677	0.57	(0.5 - 0.63)	0.105325	0.0348918	0.125196	*
SL002524	Protein	CD4	8.37136	8.46143	8.43663	0.57	(0.52 - 0.62)	0.09007	0.00792045	0.0637407	0.57	(0.51 - 0.64)	0.0652758	0.0276639	0.107476			*	*
SL010492	Protein	CAMK2B	9.59965	9.72705	9.72462	0.57	(0.52 - 0.63)	0.127404	0.0141547	0.0920055	0.57	(0.5 - 0.63)	0.12497	0.0636575	0.185165
SL011073	Protein	XPNPEP1	13.1956	13.4015	13.4057	0.57	(0.51 - 0.62)	0.20587	0.00759582	0.0623152	0.57	(0.51 - 0.64)	0.210045	0.0294635	0.112147
SL008588	Protein	CD84	12.6186	12.7116	12.7212	0.57	(0.52 - 0.62)	0.0929488	0.00816564	0.0638886	0.57	(0.5 - 0.64)	0.102553	0.0342088	0.123163			*
SL010528	Protein	UFM1	11.6471	11.8314	11.8166	0.57	(0.52 - 0.62)	0.184282	0.0101892	0.0721471	0.57	(0.5 - 0.63)	0.169476	0.0521239	0.162527
SL012188	Protein	EPS15L1	8.65533	8.72376	8.73783	0.57	(0.52 - 0.63)	0.0684327	0.11529	0.325705	0.57	(0.51 - 0.64)	0.0825002	0.134502	0.301471
SL006705	Protein	PFDN5	8.68842	8.73144	8.72807	0.57	(0.52 - 0.62)	0.0430239	0.0788296	0.271882	0.57	(0.5 - 0.63)	0.039649	0.231043	0.433847
SL000539	Protein	GPI	14.2877	14.4283	14.4296	0.57	(0.51 - 0.62)	0.140668	0.00689321	0.0583284	0.57	(0.51 - 0.64)	0.141945	0.0240663	0.096827
SL010519	Protein	ZAP70	13.485	13.3996	13.4066	0.57	(0.51 - 0.62)	-0.0853452	0.0345013	0.157587	0.57	(0.5 - 0.63)	-0.078436	0.114351	0.270074
SL003362	Protein	C3	13.6914	13.6372	13.6319	0.57	(0.52 - 0.62)	-0.0541703	0.191031	0.43853	0.57	(0.5 - 0.63)	-0.0595024	0.243179	0.447682
SL005184	Protein	IL12B IL23A	10.4878	10.6459	10.7005	0.56	(0.5 - 0.61)	0.158151	0.0134193	0.0885886	0.57	(0.51 - 0.64)	0.212774	0.0109993	0.0532632			*	*
SL006131	Protein	FABP1	11.6205	11.718	11.7398	0.56	(0.51 - 0.61)	0.0974155	0.128442	0.349543	0.57	(0.5 - 0.63)	0.119239	0.141995	0.311247			*
SL011180	Protein	HK1	10.4697	10.4238	10.4026	0.56	(0.51 - 0.61)	-0.0459427	0.227412	0.475382	0.57	(0.5 - 0.64)	-0.0670899	0.158949	0.336995
SL004747	Protein	APOM	13.2502	13.1349	13.1152	0.56	(0.51 - 0.61)	-0.115247	0.0116537	0.0790954	0.57	(0.51 - 0.64)	-0.134988	0.0228009	0.0935279
SL003328	Protein	CFI	15.4637	15.4372	15.4272	0.56	(0.51 - 0.61)	-0.0265395	0.0956564	0.301603	0.57	(0.5 - 0.64)	-0.0365882	0.0609389	0.179732
SL005153	Protein	CNTFR	12.6732	12.7514	12.7718	0.56	(0.51 - 0.62)	0.0782243	0.0268472	0.135844	0.57	(0.5 - 0.64)	0.0986308	0.0323633	0.118908
SL010616	Protein	PTPN11	12.7854	12.8958	12.9271	0.56	(0.5 - 0.61)	0.11037	0.0563946	0.22216	0.57	(0.5 - 0.63)	0.141717	0.0395239	0.135488
SL007752	Protein	DAPK2	11.1032	11.1481	11.1551	0.56	(0.5 - 0.61)	0.0448598	0.263637	0.510947	0.57	(0.5 - 0.63)	0.0519261	0.284851	0.493743
SL007871	Protein	CMPK1	12.5252	12.4807	12.4953	0.56	(0.5 - 0.61)	-0.0445494	0.16999	0.414091	0.57	(0.5 - 0.64)	-0.0299343	0.573314	0.737929
SL014292	Protein	SIGLEC14	14.0021	14.0788	14.144	0.56	(0.51 - 0.61)	0.0766589	0.478084	0.695919	0.57	(0.5 - 0.63)	0.141833	0.272696	0.481563
SL008466	Protein	HAAO	12.3175	12.2273	12.1995	0.56	(0.5 - 0.61)	-0.0902277	0.0471693	0.193957	0.57	(0.51 - 0.64)	-0.118019	0.040059	0.136491
SL000542	Protein	ITGA2B ITGB3	10.8511	10.9573	11.0064	0.56	(0.5 - 0.61)	0.106258	0.0793988	0.273287	0.57	(0.5 - 0.64)	0.155277	0.0494206	0.157816
SL018938	Protein	SUMO3	11.8075	11.9378	11.9645	0.56	(0.51 - 0.61)	0.130273	0.040398	0.173716	0.57	(0.5 - 0.64)	0.15697	0.0498099	0.158231
LPC 20:3	Lipid	LPC 20:3	-3.41813	-3.52322	-3.56163	0.55	(0.5 - 0.61)	-0.105089	0.0274709	0.138585	0.57	(0.5 - 0.63)	-0.143499	0.0165441	0.0724339
LPE(P-18:0)	Lipid	LPE(P-18:0)	-5.87509	-5.78336	-5.74172	0.55	(0.5 - 0.6)	0.0917306	0.0717739	0.259253	0.57	(0.51 - 0.64)	0.133365	0.0435262	0.145087
PC 28:0	Lipid	PC 28:0	-8.60074	-8.38519	-8.25829	0.55	(0.49 - 0.6)	0.21555	0.0336583	0.155417	0.57	(0.51 - 0.64)	0.342446	0.00902327	0.0464919		*
SM 42:1	Lipid	SM 42:1	0.0404497	-0.0474834	-0.0860403	0.55	(0.5 - 0.6)	-0.0879331	0.113842	0.322595	0.57	(0.51 - 0.64)	-0.12649	0.070546	0.200374
SL002662	Protein	F11	10.731	10.6797	10.6594	0.55	(0.5 - 0.61)	-0.0512723	0.0226923	0.12136	0.57	(0.5 - 0.64)	-0.0716175	0.0188926	0.0802221
SL004327	Protein	TNFSF13B	10.4031	10.4515	10.4679	0.55	(0.5 - 0.6)	0.0484156	0.18903	0.435568	0.57	(0.5 - 0.64)	0.0647364	0.153549	0.328894
SL004661	Protein	ACAN	8.71421	8.66568	8.67412	0.55	(0.5 - 0.6)	-0.0485308	0.186487	0.434708	0.57	(0.5 - 0.63)	-0.0400854	0.483267	0.670542
SL010460	Protein	FCGR2B	10.9948	11.16	11.2353	0.55	(0.49 - 0.6)	0.165217	0.0734917	0.263696	0.57	(0.51 - 0.64)	0.240571	0.0367528	0.1294			*	*
SL004466	Protein	SERPIND1	11.8298	11.7839	11.7583	0.55	(0.49 - 0.6)	-0.0458169	0.0716456	0.259253	0.57	(0.5 - 0.64)	-0.0714555	0.043989	0.145767
SL010462	Protein	FCN1	10.6577	10.7691	10.7725	0.55	(0.5 - 0.6)	0.111382	0.0243087	0.126796	0.57	(0.5 - 0.63)	0.114799	0.0733419	0.204534			*
SL008504	Protein	GNS	10.9095	10.9723	10.9913	0.55	(0.5 - 0.61)	0.0627243	0.0736871	0.263837	0.57	(0.5 - 0.64)	0.0817675	0.0783921	0.214382
SL009951	Protein	WNT7A	8.10341	8.06565	8.08324	0.55	(0.49 - 0.6)	-0.0377563	0.504917	0.714664	0.57	(0.5 - 0.64)	-0.0201694	0.807886	0.902994
SL002078	Protein	TGFBR2	10.1695	10.1279	10.0535	0.55	(0.49 - 0.6)	-0.0416151	0.54214	0.746713	0.57	(0.5 - 0.64)	-0.115966	0.129142	0.294346
SL005308	Protein	PSME3	8.2039	8.09764	8.04661	0.55	(0.5 - 0.61)	-0.106254	0.107982	0.316823	0.57	(0.5 - 0.63)	-0.157292	0.0233524	0.0952688
SL016566	Protein	STK17B	12.0569	12.0351	12.0188	0.55	(0.5 - 0.6)	-0.0217491	0.475598	0.694693	0.57	(0.5 - 0.64)	-0.0380357	0.31643	0.521214
SL002702	Protein	PIM1	9.88102	9.77113	9.74612	0.55	(0.5 - 0.61)	-0.109888	0.0764428	0.268629	0.57	(0.5 - 0.64)	-0.134893	0.058083	0.173428
SL008113	Protein	ATP5O	11.5315	11.7209	11.7732	0.55	(0.5 - 0.61)	0.18943	0.0191087	0.107288	0.57	(0.5 - 0.63)	0.241691	0.0241135	0.096827
AcylCarnitine 14:1	Lipid	AcylCarnitine 14:1	-5.79984	-5.66649	-5.6023	0.54	(0.49 - 0.6)	0.133349	0.131935	0.355613	0.57	(0.5 - 0.64)	0.197535	0.092795	0.236536
AcylCarnitine 14:2	Lipid	AcylCarnitine 14:2	-7.51479	-7.40015	-7.32031	0.54	(0.49 - 0.59)	0.114639	0.182109	0.429239	0.57	(0.5 - 0.63)	0.194482	0.0802765	0.217172
LPC(P-16:0)	Lipid	LPC(P-16:0)	-5.94718	-6.00509	-6.06354	0.54	(0.48 - 0.59)	-0.0579112	0.129202	0.349922	0.57	(0.51 - 0.64)	-0.116365	0.0231161	0.0945911
PC 39:6	Lipid	PC 39:6	-6.13514	-6.20433	-6.26126	0.54	(0.49 - 0.6)	-0.0691881	0.200983	0.446336	0.57	(0.5 - 0.63)	-0.126117	0.0693586	0.198671
PC(O-32:0)	Lipid	PC(O-32:0)	-6.26945	-6.20904	-6.16707	0.54	(0.49 - 0.59)	0.0604088	0.10218	0.310582	0.57	(0.5 - 0.63)	0.10238	0.0429525	0.144027
PC(P-36:2)	Lipid	PC(P-36:2)	-9.53136	-9.43513	-9.3481	0.54	(0.48 - 0.59)	0.0962293	0.154321	0.391594	0.57	(0.5 - 0.64)	0.183253	0.0366702	0.1294
PE(P-16:0/18:2)	Lipid	PE(P-16:0/18:2)	-2.99232	-2.94066	-2.84513	0.54	(0.48 - 0.59)	0.0516572	0.456757	0.681908	0.57	(0.5 - 0.63)	0.147188	0.0741317	0.206057
PE(P-18:0/18:1)	Lipid	PE(P-18:0/18:1)	-3.85035	-3.78875	-3.69944	0.54	(0.48 - 0.59)	0.0615946	0.347927	0.58333	0.57	(0.5 - 0.63)	0.150908	0.0490578	0.157022
PI 38:4	Lipid	PI 38:4	1.94229	1.89554	1.85909	0.54	(0.49 - 0.59)	-0.0467495	0.182415	0.42936	0.57	(0.5 - 0.64)	-0.0831989	0.053502	0.165905
S1P (d18:1)	Lipid	S1P (d18:1)	-4.94201	-4.87427	-4.82486	0.54	(0.49 - 0.59)	0.0677388	0.103299	0.312859	0.57	(0.5 - 0.64)	0.117149	0.026274	0.102785
SM 36:2	Lipid	SM 36:2	-0.713093	-0.792511	-0.831223	0.54	(0.49 - 0.59)	-0.0794179	0.0778982	0.271221	0.57	(0.5 - 0.63)	-0.11813	0.0282051	0.109077
TG 56:9	Lipid	TG 56:9	-4.07441	-4.26882	-4.39565	0.54	(0.49 - 0.59)	-0.194407	0.0963752	0.303304	0.57	(0.5 - 0.64)	-0.32124	0.0273563	0.106526
SL019096	Protein	PIAS4	9.55689	9.60526	9.62827	0.54	(0.49 - 0.59)	0.0483755	0.146794	0.379329	0.57	(0.5 - 0.64)	0.071389	0.0764747	0.210836
SL017424	Protein	C10orf54	9.06314	9.08597	9.10175	0.54	(0.49 - 0.6)	0.0228243	0.423852	0.656562	0.57	(0.51 - 0.64)	0.0386068	0.241833	0.446177
SL004332	Protein	PROK1	7.38692	7.41602	7.40375	0.54	(0.49 - 0.59)	0.0291036	0.400263	0.633968	0.57	(0.5 - 0.63)	0.016834	0.74132	0.863481
SL004645	Protein	SPINT1	12.2701	12.2244	12.1681	0.54	(0.49 - 0.59)	-0.0457087	0.273283	0.520043	0.57	(0.5 - 0.63)	-0.102035	0.0533667	0.16579
SL000325	Protein	C9	16.2843	16.3199	16.3573	0.54	(0.48 - 0.59)	0.0355567	0.209067	0.456797	0.57	(0.51 - 0.64)	0.0729248	0.0318498	0.118158
SL002695	Protein	CNDP2	10.2684	10.2519	10.2388	0.54	(0.49 - 0.59)	-0.0164632	0.669318	0.832652	0.57	(0.5 - 0.64)	-0.0295744	0.600267	0.757494
SL003863	Protein	KLK5	7.57138	7.52631	7.50711	0.54	(0.49 - 0.6)	-0.0450694	0.311115	0.558157	0.57	(0.5 - 0.64)	-0.0642718	0.299177	0.504599
SL004515	Protein	PGLYRP1	9.25687	9.36773	9.42307	0.54	(0.49 - 0.6)	0.110851	0.21019	0.457245	0.57	(0.51 - 0.64)	0.166197	0.111498	0.266895
SL002705	Protein	THBS1	10.8362	10.9845	11.0619	0.54	(0.49 - 0.6)	0.148314	0.0913009	0.295026	0.57	(0.5 - 0.63)	0.225715	0.0342525	0.123163
SL007640	Protein	CLEC7A	9.68886	9.74942	9.78041	0.54	(0.49 - 0.6)	0.0605643	0.0994753	0.307337	0.57	(0.5 - 0.64)	0.0915501	0.0842685	0.223219
SL000252	Protein	A2M	14.2691	14.3403	14.3781	0.54	(0.49 - 0.6)	0.0712311	0.0999966	0.308384	0.57	(0.5 - 0.63)	0.109011	0.0478533	0.154042
SL000088	Protein	TGFB2	7.93062	7.90642	7.8574	0.54	(0.49 - 0.6)	-0.0242013	0.614858	0.797475	0.57	(0.5 - 0.64)	-0.0732203	0.158409	0.336321
SL000572	Protein	SAA1	9.91693	10.1804	10.4304	0.54	(0.48 - 0.59)	0.263456	0.115691	0.325705	0.57	(0.51 - 0.64)	0.513509	0.0197889	0.0823726
SL003764	Protein	NCAM1	13.4153	13.3583	13.3277	0.54	(0.49 - 0.59)	-0.0569645	0.0489307	0.199615	0.57	(0.51 - 0.64)	-0.087545	0.0241734	0.096827
SL005572	Protein	GSN	9.71978	9.75798	9.78264	0.54	(0.49 - 0.59)	0.0382033	0.125886	0.343696	0.57	(0.5 - 0.64)	0.0628627	0.0563133	0.171477
SL007153	Protein	LPO	9.52393	9.60257	9.64002	0.54	(0.49 - 0.59)	0.0786373	0.157593	0.399299	0.57	(0.51 - 0.64)	0.116087	0.092112	0.235863
SL008177	Protein	C1QBP	12.329	12.3143	12.296	0.54	(0.49 - 0.6)	-0.0147571	0.338943	0.575277	0.57	(0.5 - 0.64)	-0.0330427	0.106703	0.260287
SL003522	Protein	ERP29	12.7434	12.804	12.8644	0.54	(0.48 - 0.59)	0.060519	0.0906888	0.294633	0.57	(0.5 - 0.64)	0.121	0.0193573	0.0817844
SL007356	Protein	NOTCH2	9.54169	9.49733	9.44609	0.54	(0.49 - 0.59)	-0.0443588	0.340112	0.5756	0.57	(0.5 - 0.64)	-0.0956075	0.114441	0.270074
SL005231	Protein	UNC5D	12.2525	12.3645	12.4143	0.54	(0.49 - 0.59)	0.111973	0.0383645	0.169285	0.57	(0.5 - 0.64)	0.161736	0.0195121	0.081907			*
SL000158	Protein	FOLH1	9.44234	9.38344	9.33786	0.54	(0.49 - 0.6)	-0.0589044	0.45627	0.681783	0.57	(0.51 - 0.64)	-0.104479	0.327436	0.533393
Hex3Cer(d18:1/16:0)	Lipid	Hex3Cer(d18:1/16:0)	-7.10591	-7.05814	-7.00556	0.53	(0.47 - 0.58)	0.047774	0.277095	0.523816	0.57	(0.5 - 0.63)	0.10035	0.0569915	0.171992
Hex3Cer(d18:1/24:1) [SL]	Lipid	Hex3Cer(d18:1/24:1) [SL]	-7.06885	-6.99833	-6.90867	0.53	(0.47 - 0.58)	0.0705167	0.174862	0.420365	0.57	(0.5 - 0.64)	0.16018	0.0110313	0.0532656
LPC 18:0	Lipid	LPC 18:0	0.387362	0.318635	0.239934	0.53	(0.48 - 0.59)	-0.0687263	0.146684	0.379329	0.57	(0.5 - 0.64)	-0.147428	0.0155385	0.0693046
PC 31:0	Lipid	PC 31:0	-5.9681	-5.87641	-5.75048	0.53	(0.47 - 0.58)	0.0916878	0.187373	0.434905	0.57	(0.51 - 0.64)	0.217614	0.0127967	0.0590884
PC 32:0	Lipid	PC 32:0	-2.89813	-2.84168	-2.77731	0.53	(0.48 - 0.58)	0.0564476	0.187176	0.434905	0.57	(0.5 - 0.64)	0.120825	0.0299446	0.113722
PC(O-36:2)	Lipid	PC(O-36:2)	-6.74399	-6.68657	-6.62996	0.53	(0.48 - 0.59)	0.0574207	0.210224	0.457245	0.57	(0.5 - 0.63)	0.114031	0.0442186	0.146012
PE 38:4	Lipid	PE 38:4	0.773306	0.841527	0.921285	0.53	(0.47 - 0.58)	0.0682212	0.248954	0.497909	0.57	(0.5 - 0.63)	0.147979	0.0444947	0.146012
SM 42:0	Lipid	SM 42:0	-3.22	-3.2768	-3.35062	0.53	(0.48 - 0.59)	-0.0568015	0.258724	0.505384	0.57	(0.51 - 0.64)	-0.130625	0.0325174	0.119112
SL003349	Protein	HIF1A	9.02752	9.0826	9.14794	0.53	(0.48 - 0.59)	0.0550733	0.200204	0.445191	0.57	(0.5 - 0.64)	0.120419	0.039941	0.136491
SL014983	Protein	HIST2H2BE	13.8506	13.9465	14.07	0.53	(0.48 - 0.58)	0.0958547	0.122819	0.337641	0.57	(0.5 - 0.64)	0.219322	0.00784744	0.0418365		*
SL004147	Protein	IL10RB	10.05	10.0658	10.1024	0.53	(0.47 - 0.58)	0.0158222	0.525488	0.732345	0.57	(0.5 - 0.63)	0.0523963	0.0903639	0.233509
SL006914	Protein	NR3C1	6.91113	6.88468	6.7982	0.53	(0.47 - 0.58)	-0.0264541	0.590829	0.784564	0.57	(0.51 - 0.64)	-0.112928	0.0337365	0.122612
SL004260	Protein	RETN	10.1438	10.209	10.2925	0.53	(0.48 - 0.59)	0.0651262	0.18282	0.429652	0.57	(0.5 - 0.64)	0.148627	0.0247316	0.0981136
SL000064	Protein	KLK7	10.5547	10.4809	10.4026	0.53	(0.48 - 0.59)	-0.0737754	0.165438	0.409956	0.57	(0.5 - 0.63)	-0.152018	0.0172596	0.0749837
SL005261	Protein	PTPN2	8.35083	8.33177	8.2773	0.53	(0.48 - 0.58)	-0.0190556	0.562201	0.763762	0.57	(0.51 - 0.64)	-0.0735278	0.0306585	0.115396
SL004660	Protein	IBSP	12.1957	12.2812	12.368	0.53	(0.47 - 0.58)	0.085454	0.260912	0.507997	0.57	(0.5 - 0.63)	0.172312	0.0796595	0.216438
SL000507	Protein	LTA LTB	6.65347	6.63348	6.57986	0.53	(0.48 - 0.58)	-0.0199919	0.550033	0.752067	0.57	(0.5 - 0.64)	-0.0736132	0.0896857	0.232467
SL006029	Protein	CHIT1	11.4299	11.5441	11.6423	0.53	(0.48 - 0.58)	0.114211	0.196181	0.440886	0.57	(0.5 - 0.63)	0.21237	0.063071	0.184412			*	*
SL008709	Protein	DSC3	8.39377	8.40253	8.35119	0.53	(0.48 - 0.59)	0.00876647	0.846574	0.927227	0.57	(0.51 - 0.64)	-0.042574	0.446664	0.639993
SL011588	Protein	RPS3A	9.67117	9.59767	9.52518	0.53	(0.48 - 0.59)	-0.0735004	0.309581	0.557187	0.57	(0.5 - 0.63)	-0.145986	0.0635626	0.185165
SL004269	Protein	GHRL	10.0089	9.93282	9.85858	0.53	(0.48 - 0.59)	-0.0760963	0.163092	0.406726	0.57	(0.5 - 0.63)	-0.150335	0.0157449	0.0697527
Hex3Cer(d18:1/16:0) [SL]	Lipid	Hex3Cer(d18:1/16:0) [SL]	-5.339	-5.30628	-5.22962	0.52	(0.47 - 0.57)	0.0327229	0.395203	0.629495	0.57	(0.5 - 0.63)	0.109387	0.0304788	0.115233
PC 44:12	Lipid	PC 44:12	-13.3395	-13.4148	-13.5611	0.52	(0.47 - 0.58)	-0.0753261	0.418075	0.648804	0.57	(0.51 - 0.64)	-0.22156	0.0500158	0.158485
PC(O-34:1)	Lipid	PC(O-34:1)	-5.64677	-5.60799	-5.541	0.52	(0.47 - 0.58)	0.0387789	0.286394	0.535997	0.57	(0.5 - 0.63)	0.105767	0.0245559	0.0976459
TG(O-50:2)	Lipid	TG(O-50:2)	-2.00383	-1.97882	-1.91575	0.52	(0.46 - 0.57)	0.0250169	0.541017	0.745774	0.57	(0.5 - 0.64)	0.0880818	0.0964876	0.243692
SL005235	Protein	NANOG	7.46301	7.47109	7.37945	0.52	(0.46 - 0.57)	0.00807951	0.884579	0.949167	0.57	(0.51 - 0.64)	-0.0835614	0.152982	0.328512
SL005034	Protein	RAN	11.7593	11.6779	11.531	0.52	(0.47 - 0.57)	-0.0813832	0.402162	0.635293	0.57	(0.5 - 0.64)	-0.228369	0.0813069	0.218456
SL012538	Protein	CDNF	11.8863	11.9069	11.9815	0.52	(0.46 - 0.57)	0.0205421	0.607011	0.793497	0.57	(0.5 - 0.64)	0.0951521	0.0939855	0.239182
SL005212	Protein	PRLR	10.3116	10.3393	10.3899	0.52	(0.47 - 0.57)	0.0276517	0.576025	0.775782	0.57	(0.5 - 0.63)	0.0782924	0.230235	0.433847			*	*
SL004365	Protein	TNFSF12	9.39529	9.39746	9.35653	0.52	(0.47 - 0.58)	0.00217438	0.957151	0.987028	0.57	(0.51 - 0.64)	-0.0387635	0.454865	0.648199
SL006114	Protein	ROR1	9.18201	9.22238	9.29965	0.52	(0.47 - 0.58)	0.0403731	0.240219	0.488533	0.57	(0.5 - 0.64)	0.117647	0.0184101	0.0789672			*	*
SL000462	Protein	IGFBP1	9.48859	9.52065	9.72666	0.51	(0.46 - 0.57)	0.0320653	0.757202	0.884599	0.57	(0.5 - 0.63)	0.238073	0.0564902	0.171706
SL000519	Protein	CCL3	10.0845	10.1187	10.1784	0.51	(0.46 - 0.57)	0.0342067	0.495123	0.706508	0.57	(0.5 - 0.63)	0.0939156	0.107082	0.260387
SL003167	Protein	CXCL13	11.9499	12.002	12.1041	0.49	(0.44 - 0.54)	0.0520619	0.470641	0.692061	0.57	(0.5 - 0.63)	0.154138	0.0830295	0.220976
SL010465	Protein	MATN2	13.1802	13.2057	13.2553	0.48	(0.43 - 0.54)	0.0254509	0.339379	0.575277	0.57	(0.5 - 0.63)	0.0750854	0.0444394	0.146012
SL004579	Protein	MRC1	13.4674	13.527	13.5677	0.47	(0.42 - 0.52)	0.0595323	0.0876866	0.290772	0.57	(0.5 - 0.64)	0.100275	0.0249268	0.0986565
SL000300	Protein	POMC	9.65881	9.53165	9.56048	0.59	(0.54 - 0.64)	-0.127155	0.00526246	0.0488657	0.56	(0.5 - 0.63)	-0.0983242	0.0795284	0.21643	*
Cer(d19:1/24:0)	Lipid	Cer(d19:1/24:0)	-4.73488	-4.90212	-4.87055	0.57	(0.52 - 0.63)	-0.167244	0.00697599	0.0583284	0.56	(0.49 - 0.63)	-0.135678	0.0818132	0.218711
SL002539	Protein	TNFRSF11B	13.6944	13.6189	13.6226	0.57	(0.52 - 0.62)	-0.075465	0.0387025	0.169801	0.56	(0.5 - 0.63)	-0.071794	0.11303	0.268665
SL005157	Protein	CD209	10.5791	10.466	10.4778	0.57	(0.51 - 0.62)	-0.113135	0.00799925	0.0637676	0.56	(0.49 - 0.63)	-0.101334	0.0548724	0.168308
SL010517	Protein	STK16	10.8871	10.8502	10.8781	0.57	(0.51 - 0.62)	-0.0369187	0.269155	0.517488	0.56	(0.49 - 0.63)	-0.00901375	0.856967	0.928381
SL011532	Protein	ETHE1	12.0073	11.9725	11.9624	0.57	(0.51 - 0.62)	-0.034789	0.223772	0.470953	0.56	(0.49 - 0.62)	-0.0448766	0.225084	0.426449
SL010927	Protein	KPNB1	12.0046	12.2095	12.1794	0.57	(0.52 - 0.62)	0.204867	0.00504592	0.0473756	0.56	(0.5 - 0.63)	0.174809	0.060105	0.177958	*
SL000322	Protein	C6	16.452	16.4042	16.4064	0.57	(0.52 - 0.62)	-0.0477882	0.160428	0.40406	0.56	(0.49 - 0.62)	-0.0456305	0.296602	0.502262
SL011628	Protein	DBNL	11.6122	11.7068	11.6805	0.57	(0.52 - 0.63)	0.0946177	0.0441659	0.184753	0.56	(0.5 - 0.63)	0.0683057	0.219424	0.420915
SL008933	Protein	PARK7	8.86765	8.97633	8.94212	0.57	(0.52 - 0.62)	0.108672	0.0277254	0.139038	0.56	(0.5 - 0.63)	0.0744692	0.188142	0.378074			*	*
SL006921	Protein	PDK1	10.592	10.5477	10.5965	0.57	(0.51 - 0.62)	-0.0443242	0.462959	0.686316	0.56	(0.49 - 0.63)	0.00451657	0.959008	0.983034
DG 38:6 [NL-20:5]	Lipid	DG 38:6 [NL-20:5]	-3.9508	-4.14187	-4.15088	0.56	(0.5 - 0.61)	-0.191066	0.023499	0.124885	0.56	(0.49 - 0.62)	-0.200084	0.0576843	0.173428
SL007361	Protein	CLC	9.26946	9.18644	9.18306	0.56	(0.51 - 0.61)	-0.0830131	0.0977433	0.305828	0.56	(0.49 - 0.63)	-0.0863986	0.136452	0.303427
SL000509	Protein	LTBR	12.4668	12.4045	12.4019	0.56	(0.51 - 0.62)	-0.0622448	0.0560377	0.221788	0.56	(0.5 - 0.63)	-0.064873	0.12017	0.280018
SL000007	Protein	ESR1	9.7377	9.66312	9.66754	0.56	(0.51 - 0.61)	-0.0745813	0.0222382	0.11969	0.56	(0.49 - 0.63)	-0.0701617	0.0701238	0.200185
SL001997	Protein	IL1R1	12.7243	12.8582	12.8401	0.56	(0.51 - 0.62)	0.133905	0.00573408	0.0515064	0.56	(0.49 - 0.63)	0.115871	0.067766	0.194439
SL004771	Protein	AURKA	10.2777	10.2861	10.2615	0.56	(0.51 - 0.61)	0.00839508	0.889152	0.950454	0.56	(0.49 - 0.63)	-0.0161748	0.814998	0.904809
SL007280	Protein	CTSC	9.24263	9.20875	9.20132	0.56	(0.51 - 0.61)	-0.0338788	0.252123	0.500416	0.56	(0.49 - 0.63)	-0.0413056	0.223124	0.423686
SL010529	Protein	UFC1	13.8709	14.0073	14.01	0.56	(0.51 - 0.61)	0.136488	0.00837172	0.0645306	0.56	(0.5 - 0.63)	0.139163	0.0288798	0.110925
SL010493	Protein	CAMK2D	11.0686	11.1474	11.1505	0.56	(0.51 - 0.61)	0.0788485	0.211626	0.458294	0.56	(0.49 - 0.63)	0.081894	0.29307	0.499786
SL008122	Protein	DUSP3	10.667	10.8388	10.8143	0.56	(0.51 - 0.62)	0.171738	0.0165919	0.0998942	0.56	(0.49 - 0.62)	0.147284	0.10688	0.260287
SL006912	Protein	FGR	8.46422	8.36801	8.32475	0.56	(0.5 - 0.61)	-0.0962059	0.24324	0.492168	0.56	(0.49 - 0.63)	-0.139467	0.137945	0.30594
SL010973	Protein	PSMA1	9.46233	9.50313	9.4921	0.56	(0.51 - 0.61)	0.0407967	0.228351	0.476436	0.56	(0.49 - 0.62)	0.0297695	0.429344	0.630401
SL011211	Protein	EIF4G2	11.1595	11.4163	11.3919	0.56	(0.51 - 0.62)	0.256758	0.00958549	0.0695256	0.56	(0.49 - 0.63)	0.232344	0.057977	0.173428
SL008865	Protein	PSMA2	9.43737	9.50103	9.49607	0.56	(0.51 - 0.61)	0.0636589	0.0276071	0.138857	0.56	(0.49 - 0.62)	0.0587003	0.0965067	0.243692
SL004070	Protein	RPS27A	10.4921	10.5524	10.5688	0.56	(0.5 - 0.61)	0.0602719	0.19245	0.439247	0.56	(0.49 - 0.62)	0.0767691	0.177135	0.364627
SL006406	Protein	PLXNC1	9.56374	9.50286	9.51244	0.56	(0.5 - 0.61)	-0.0608776	0.0441654	0.184753	0.56	(0.5 - 0.63)	-0.0513026	0.216551	0.417127
SL005352	Protein	FABP5	9.8402	9.90908	9.91272	0.56	(0.5 - 0.61)	0.0688849	0.171015	0.414655	0.56	(0.5 - 0.63)	0.0725183	0.25685	0.463757
SL002803	Protein	UCHL1	11.2412	11.3792	11.333	0.56	(0.5 - 0.61)	0.137961	0.0074799	0.0616636	0.56	(0.49 - 0.62)	0.0918004	0.104645	0.25705
SL003653	Protein	PGK1	11.2024	11.2615	11.2569	0.56	(0.5 - 0.61)	0.0590468	0.32625	0.568415	0.56	(0.5 - 0.63)	0.0545157	0.432428	0.630623
SL002071	Protein	GRP	8.66671	8.62588	8.64038	0.56	(0.5 - 0.61)	-0.0408309	0.411234	0.642316	0.56	(0.49 - 0.63)	-0.0263359	0.665334	0.804877
SL001713	Protein	IL17A	8.63662	8.62138	8.61141	0.56	(0.5 - 0.61)	-0.015235	0.760458	0.886939	0.56	(0.5 - 0.63)	-0.0252137	0.675256	0.810499
DG 38:6 [NL-20:4]	Lipid	DG 38:6 [NL-20:4]	-2.62893	-2.80478	-2.8695	0.55	(0.5 - 0.6)	-0.175849	0.0308556	0.148142	0.56	(0.49 - 0.63)	-0.240573	0.0301773	0.114349
DG 40:6 [NL-22:6]	Lipid	DG 40:6 [NL-22:6]	-1.8103	-1.7647	-1.74991	0.55	(0.49 - 0.6)	0.0456039	0.142033	0.369625	0.56	(0.49 - 0.63)	0.060388	0.136121	0.303088
PC 35:4	Lipid	PC 35:4	-6.28459	-6.39528	-6.4199	0.55	(0.5 - 0.6)	-0.110686	0.0362208	0.162801	0.56	(0.49 - 0.62)	-0.135308	0.0510586	0.160389
PC(P-40:6)	Lipid	PC(P-40:6)	-10.1668	-10.133	-10.1226	0.55	(0.5 - 0.6)	0.0338672	0.33114	0.571679	0.56	(0.5 - 0.63)	0.0441973	0.34524	0.55095
TG 56:6	Lipid	TG 56:6	-1.18937	-1.31675	-1.35365	0.55	(0.49 - 0.6)	-0.127388	0.0613053	0.233874	0.56	(0.49 - 0.62)	-0.164285	0.0505599	0.159118
TG 58:8	Lipid	TG 58:8	-2.02249	-2.18407	-2.23352	0.55	(0.49 - 0.6)	-0.161579	0.0892662	0.292281	0.56	(0.49 - 0.62)	-0.21103	0.0781127	0.214342
SL000038	Protein	CCL2	10.2599	10.1907	10.1683	0.55	(0.5 - 0.61)	-0.0691604	0.0895869	0.292281	0.56	(0.5 - 0.63)	-0.0915158	0.054139	0.166854
SL004760	Protein	PAFAH1B2	12.5915	12.6757	12.6942	0.55	(0.49 - 0.6)	0.0842475	0.0656677	0.243374	0.56	(0.49 - 0.62)	0.10273	0.0709999	0.200886
SL002081	Protein	CDH5	13.6336	13.5915	13.587	0.55	(0.49 - 0.6)	-0.042083	0.0929883	0.298445	0.56	(0.49 - 0.62)	-0.0466012	0.116675	0.274243
SL000480	Protein	IL4	9.03144	9.01167	8.98512	0.55	(0.5 - 0.6)	-0.0197781	0.583169	0.78033	0.56	(0.49 - 0.63)	-0.0463229	0.209801	0.409899
SL001718	Protein	IL13	9.61408	9.57205	9.59444	0.55	(0.5 - 0.6)	-0.042035	0.388222	0.622067	0.56	(0.49 - 0.63)	-0.0196408	0.755052	0.872082
SL006992	Protein	MATN3	9.03524	9.00289	8.98522	0.55	(0.49 - 0.6)	-0.0323477	0.219547	0.466709	0.56	(0.49 - 0.63)	-0.0500183	0.0671594	0.193355
SL000565	Protein	REN	10.1158	10.2896	10.3255	0.55	(0.5 - 0.6)	0.173741	0.0458846	0.190061	0.56	(0.5 - 0.63)	0.209725	0.0618398	0.182072				*
SL000057	Protein	TK1	8.91924	8.90769	8.88509	0.55	(0.5 - 0.6)	-0.0115538	0.676737	0.837215	0.56	(0.49 - 0.63)	-0.0341536	0.274376	0.482513
SL013988	Protein	CHST2	8.24091	8.19819	8.19872	0.55	(0.5 - 0.6)	-0.0427164	0.239668	0.487998	0.56	(0.49 - 0.63)	-0.0421885	0.378241	0.581116
SL006197	Protein	DNAJC19	9.197	9.18739	9.15293	0.55	(0.49 - 0.6)	-0.00960901	0.688838	0.842377	0.56	(0.49 - 0.63)	-0.0440699	0.0308481	0.115852
SL014289	Protein	KIR3DS1	8.87621	8.80128	8.79114	0.55	(0.49 - 0.6)	-0.0749277	0.199462	0.444124	0.56	(0.49 - 0.62)	-0.0850697	0.231043	0.433847
SL005730	Protein	PDE2A	12.6848	12.6424	12.6351	0.55	(0.5 - 0.6)	-0.04241	0.0893372	0.292281	0.56	(0.49 - 0.63)	-0.0497281	0.104284	0.256536
SL004750	Protein	DDX19B	12.1557	12.3151	12.3309	0.55	(0.5 - 0.61)	0.159408	0.0190451	0.107287	0.56	(0.49 - 0.63)	0.175242	0.0377412	0.132055
SL014129	Protein	HS6ST1	11.3318	11.292	11.287	0.55	(0.5 - 0.6)	-0.0397797	0.059621	0.229963	0.56	(0.49 - 0.63)	-0.0447822	0.112151	0.267483
SL000442	Protein	GH1	8.45094	8.38496	8.40796	0.55	(0.5 - 0.61)	-0.0659796	0.267357	0.515433	0.56	(0.49 - 0.63)	-0.0429843	0.596771	0.756029
SL004811	Protein	TAGLN2	13.1935	13.316	13.3311	0.55	(0.5 - 0.61)	0.122436	0.0422335	0.180239	0.56	(0.5 - 0.63)	0.1376	0.0723894	0.202882
LPC 22:5	Lipid	LPC 22:5	-5.59646	-5.66658	-5.70855	0.54	(0.49 - 0.59)	-0.0701208	0.169766	0.414091	0.56	(0.49 - 0.63)	-0.112084	0.0862093	0.226398
LPE 18:2	Lipid	LPE 18:2	-1.29503	-1.21395	-1.18854	0.54	(0.49 - 0.6)	0.0810882	0.245722	0.494227	0.56	(0.49 - 0.63)	0.106494	0.261725	0.46937
LPE(P-18:1)	Lipid	LPE(P-18:1)	-7.48585	-7.36239	-7.33445	0.54	(0.49 - 0.6)	0.12346	0.0391796	0.169801	0.56	(0.49 - 0.62)	0.151402	0.0448103	0.146196
PC 38:7	Lipid	PC 38:7	-6.48284	-6.58606	-6.62371	0.54	(0.49 - 0.6)	-0.103222	0.0755399	0.267484	0.56	(0.49 - 0.63)	-0.140867	0.059216	0.175879
SM 39:1	Lipid	SM 39:1	-3.21373	-3.30283	-3.3291	0.54	(0.49 - 0.6)	-0.0890961	0.0391848	0.169801	0.56	(0.49 - 0.63)	-0.115367	0.0374563	0.13133
SM 43:2	Lipid	SM 43:2	-2.95044	-3.03255	-3.05615	0.54	(0.49 - 0.6)	-0.0821135	0.129763	0.35088	0.56	(0.49 - 0.63)	-0.105713	0.100681	0.25059
TG 56:8	Lipid	TG 56:8	-1.63681	-1.79125	-1.91899	0.54	(0.48 - 0.59)	-0.154444	0.204873	0.453188	0.56	(0.5 - 0.63)	-0.282181	0.0639297	0.185638
SL004489	Protein	TLR4	8.67949	8.63137	8.63564	0.54	(0.48 - 0.59)	-0.0481201	0.418015	0.648804	0.56	(0.49 - 0.63)	-0.0438488	0.591596	0.752408
SL015046	Protein	AMIGO2	11.0525	11.1299	11.1647	0.54	(0.49 - 0.6)	0.0773824	0.0465548	0.192366	0.56	(0.49 - 0.63)	0.112214	0.0318816	0.118158
SL019979	Protein	HIST3H2A	9.6845	9.82346	9.93044	0.54	(0.49 - 0.59)	0.138958	0.0358545	0.161763	0.56	(0.49 - 0.63)	0.245943	0.0183444	0.0788855
SL004457	Protein	SERPINE2	10.825	10.8923	10.9182	0.54	(0.49 - 0.6)	0.0672832	0.0851104	0.287673	0.56	(0.49 - 0.63)	0.0932009	0.066565	0.191971
SL007250	Protein	PIK3CG	10.7277	10.6636	10.6498	0.54	(0.49 - 0.6)	-0.0641413	0.0616267	0.234539	0.56	(0.5 - 0.63)	-0.0778791	0.0798974	0.216736
SL007806	Protein	IL22RA1	9.69939	9.66633	9.63091	0.54	(0.49 - 0.6)	-0.033066	0.369428	0.606221	0.56	(0.49 - 0.62)	-0.0684857	0.107612	0.261299
SL003679	Protein	IGF2R	15.1148	15.0884	15.0676	0.54	(0.48 - 0.59)	-0.0263733	0.297222	0.546416	0.56	(0.49 - 0.62)	-0.0471486	0.151545	0.326673
SL001896	Protein	CLU	10.2119	10.1763	10.1591	0.54	(0.49 - 0.6)	-0.0356369	0.105123	0.313632	0.56	(0.49 - 0.63)	-0.0528505	0.0663238	0.191602
SL005102	Protein	SHBG	11.5511	11.6479	11.6871	0.54	(0.49 - 0.59)	0.0968324	0.0755993	0.267484	0.56	(0.49 - 0.63)	0.136002	0.0502649	0.158485
SL010373	Protein	FCAR	7.9164	7.94758	7.94976	0.54	(0.48 - 0.59)	0.0311855	0.492135	0.705461	0.56	(0.49 - 0.63)	0.0333597	0.597978	0.756875
SL007173	Protein	GRN	14.7455	14.7867	14.8039	0.54	(0.48 - 0.59)	0.0411876	0.0882977	0.291114	0.56	(0.49 - 0.63)	0.0584502	0.0577688	0.173428
SL014208	Protein	CRTAM	9.88577	9.75325	9.70406	0.54	(0.49 - 0.59)	-0.132524	0.07014	0.256487	0.56	(0.5 - 0.63)	-0.181715	0.0186375	0.0795386
SL004556	Protein	CD55	14.0451	14.0911	14.1298	0.54	(0.48 - 0.59)	0.0460437	0.105023	0.313632	0.56	(0.49 - 0.63)	0.0847129	0.0338567	0.122676				*
SL014148	Protein	ROBO3	8.70081	8.72138	8.69262	0.54	(0.49 - 0.6)	0.020567	0.580471	0.778569	0.56	(0.5 - 0.63)	-0.00818776	0.858664	0.92936
AcylCarnitine 16:1	Lipid	AcylCarnitine 16:1	-7.26546	-7.16987	-7.12166	0.53	(0.48 - 0.58)	0.0955962	0.161214	0.405434	0.56	(0.49 - 0.63)	0.143798	0.123283	0.285019
AcylCarnitine 17:0	Lipid	AcylCarnitine 17:0	-9.13319	-9.06713	-9.02528	0.53	(0.48 - 0.59)	0.0660605	0.198289	0.442315	0.56	(0.49 - 0.63)	0.107913	0.127275	0.291062
LPC 22:0	Lipid	LPC 22:0	-10.3129	-10.3588	-10.4087	0.53	(0.48 - 0.58)	-0.0458568	0.273516	0.520043	0.56	(0.5 - 0.63)	-0.0958065	0.0673864	0.193679
PC 33:0	Lipid	PC 33:0	-6.96969	-6.90561	-6.83519	0.53	(0.47 - 0.58)	0.0640741	0.222579	0.470199	0.56	(0.5 - 0.63)	0.134498	0.043396	0.144939
PC 33:1	Lipid	PC 33:1	-4.74333	-4.65886	-4.59502	0.53	(0.48 - 0.59)	0.0844721	0.153302	0.389594	0.56	(0.49 - 0.62)	0.148314	0.0497226	0.158231
PC 34:3	Lipid	PC 34:3	-2.82741	-2.75317	-2.66391	0.53	(0.47 - 0.58)	0.0742468	0.196914	0.441358	0.56	(0.5 - 0.63)	0.163501	0.0293447	0.111947
PC 35:1	Lipid	PC 35:1	-5.73444	-5.68999	-5.64722	0.53	(0.48 - 0.58)	0.0444572	0.332713	0.573065	0.56	(0.49 - 0.63)	0.0872268	0.135029	0.302054
PC 35:2	Lipid	PC 35:2	-3.59397	-3.54748	-3.50436	0.53	(0.48 - 0.58)	0.0464864	0.319704	0.563012	0.56	(0.49 - 0.62)	0.0896127	0.13989	0.30931
PI 38:5	Lipid	PI 38:5	-2.25444	-2.18455	-2.13726	0.53	(0.48 - 0.59)	0.069887	0.185381	0.432726	0.56	(0.49 - 0.62)	0.117176	0.0804434	0.217172
PI 40:5	Lipid	PI 40:5	-0.658407	-0.609402	-0.55121	0.53	(0.48 - 0.58)	0.0490057	0.355651	0.592168	0.56	(0.49 - 0.63)	0.107197	0.113908	0.269992
SM 40:1	Lipid	SM 40:1	-0.133599	-0.187329	-0.226468	0.53	(0.48 - 0.59)	-0.0537298	0.265779	0.513333	0.56	(0.49 - 0.63)	-0.0928692	0.132138	0.298548
SL004142	Protein	EFNB3	9.84129	9.89781	9.93675	0.53	(0.47 - 0.58)	0.0565256	0.125103	0.342111	0.56	(0.49 - 0.63)	0.0954618	0.0406341	0.137895
SL004143	Protein	GFRA2	12.4493	12.4237	12.3918	0.53	(0.47 - 0.58)	-0.0256272	0.338604	0.575277	0.56	(0.5 - 0.63)	-0.0574788	0.120458	0.280018
SL004652	Protein	WIF1	11.6472	11.6926	11.7152	0.53	(0.48 - 0.58)	0.0454768	0.108663	0.317198	0.56	(0.49 - 0.62)	0.0680393	0.0635911	0.185165
SL005164	Protein	LGALS2	9.39811	9.48375	9.51605	0.53	(0.47 - 0.58)	0.0856453	0.0802711	0.275728	0.56	(0.5 - 0.63)	0.11794	0.0548744	0.168308
SL010450	Protein	CD48	9.44614	9.48725	9.51689	0.53	(0.48 - 0.59)	0.0411046	0.165003	0.409478	0.56	(0.49 - 0.62)	0.070744	0.0911289	0.234768				*
SL010468	Protein	RGMB	11.0514	11.0904	11.1287	0.53	(0.48 - 0.59)	0.039049	0.178194	0.423555	0.56	(0.49 - 0.63)	0.0773012	0.0471794	0.153039
SL010617	Protein	TPSB2	11.578	11.6882	11.7529	0.53	(0.48 - 0.59)	0.110207	0.208364	0.456725	0.56	(0.49 - 0.62)	0.174876	0.114371	0.270074			*	*
SL010494	Protein	CDC2 CCNB1	9.41456	9.38404	9.35781	0.53	(0.47 - 0.58)	-0.0305122	0.258957	0.505384	0.56	(0.5 - 0.63)	-0.0567435	0.0757887	0.209286
SL002650	Protein	PKM2	14.826	14.7258	14.6262	0.53	(0.48 - 0.58)	-0.100191	0.226407	0.474723	0.56	(0.5 - 0.63)	-0.199788	0.054028	0.166854
SL004484	Protein	SFTPD	12.6394	12.7321	12.8073	0.53	(0.47 - 0.58)	0.0926884	0.243754	0.492168	0.56	(0.49 - 0.62)	0.167905	0.0997502	0.249375
SL009054	Protein	NRXN1	9.44909	9.50397	9.5445	0.53	(0.47 - 0.58)	0.0548746	0.158597	0.400103	0.56	(0.49 - 0.63)	0.0954106	0.0719077	0.201867			*	*
AcylCarnitine 15:0	Lipid	AcylCarnitine 15:0	-9.08905	-9.00607	-8.96326	0.52	(0.47 - 0.58)	0.0829854	0.163997	0.40758	0.56	(0.49 - 0.63)	0.125788	0.0978803	0.246157
CE 22:6	Lipid	CE 22:6	0.478009	0.421285	0.335888	0.52	(0.47 - 0.58)	-0.0567238	0.36557	0.60286	0.56	(0.49 - 0.63)	-0.142121	0.0861796	0.226398
Cer(d18:2/16:0)	Lipid	Cer(d18:2/16:0)	-8.29604	-8.2815	-8.20931	0.52	(0.46 - 0.57)	0.0145378	0.799566	0.903982	0.56	(0.5 - 0.63)	0.0867308	0.252437	0.459224
LPC 22:1	Lipid	LPC 22:1	-10.8811	-10.911	-10.9701	0.52	(0.47 - 0.57)	-0.029918	0.565103	0.765403	0.56	(0.49 - 0.63)	-0.0889833	0.173348	0.358578
LPC(O-24:0)	Lipid	LPC(O-24:0)	-8.13569	-8.10589	-8.0479	0.52	(0.46 - 0.57)	0.029799	0.449241	0.676061	0.56	(0.49 - 0.63)	0.0877972	0.0962254	0.243692
PC(O-32:1)	Lipid	PC(O-32:1)	-9.13529	-9.08641	-8.99242	0.52	(0.46 - 0.57)	0.048884	0.366486	0.603078	0.56	(0.49 - 0.63)	0.142868	0.0488244	0.156572
PE 40:5	Lipid	PE 40:5	-2.81686	-2.74182	-2.63499	0.52	(0.47 - 0.57)	0.0750326	0.304194	0.553095	0.56	(0.5 - 0.63)	0.181863	0.0388878	0.134123
PE(P-18:1/18:2)	Lipid	PE(P-18:1/18:2)	-3.99951	-3.98185	-3.89612	0.52	(0.46 - 0.57)	0.0176693	0.764055	0.889072	0.56	(0.49 - 0.62)	0.103395	0.135544	0.302602
PG 34:1	Lipid	PG 34:1	-7.52883	-7.48569	-7.38357	0.52	(0.47 - 0.58)	0.0431403	0.462158	0.685733	0.56	(0.5 - 0.63)	0.145256	0.0494926	0.157816
SL002782	Protein	ADM	11.0555	11.0487	11.0184	0.52	(0.47 - 0.58)	-0.00681103	0.774943	0.894572	0.56	(0.49 - 0.63)	-0.03708	0.214591	0.414941
SL004182	Protein	PLA2G5	8.28561	8.25544	8.23395	0.52	(0.47 - 0.58)	-0.0301703	0.293269	0.543601	0.56	(0.49 - 0.62)	-0.0516564	0.137484	0.305319
SL004643	Protein	ANGPT4	9.19405	9.2034	9.16498	0.52	(0.47 - 0.58)	0.00934957	0.733526	0.868108	0.56	(0.49 - 0.62)	-0.0290687	0.400488	0.604307
SL000528	Protein	POR	12.0845	12.0683	11.9856	0.52	(0.46 - 0.57)	-0.0162061	0.783395	0.897414	0.56	(0.49 - 0.63)	-0.0988734	0.174583	0.36025
SL004939	Protein	PTPN1	11.0735	11.0944	11.039	0.52	(0.47 - 0.58)	0.0209754	0.526601	0.732971	0.56	(0.49 - 0.63)	-0.0344872	0.237761	0.439733
SL004354	Protein	IL19	12.6011	12.5784	12.5337	0.52	(0.47 - 0.57)	-0.0226325	0.442965	0.672002	0.56	(0.49 - 0.63)	-0.0673732	0.062561	0.183556
SL007284	Protein	CRISP3	8.0929	8.04494	7.97178	0.52	(0.47 - 0.58)	-0.0479617	0.298288	0.546754	0.56	(0.5 - 0.63)	-0.121121	0.00899348	0.0464801		*
SL002706	Protein	FCER2	12.2872	12.3435	12.4404	0.52	(0.46 - 0.57)	0.0563409	0.316722	0.561657	0.56	(0.49 - 0.63)	0.153163	0.0438027	0.145435
SL009089	Protein	BCAN	10.3781	10.3516	10.3036	0.52	(0.47 - 0.58)	-0.0265258	0.47501	0.694435	0.56	(0.49 - 0.62)	-0.0744877	0.102568	0.253422
SL008936	Protein	CHL1	13.4164	13.3907	13.3474	0.52	(0.47 - 0.58)	-0.0257069	0.410766	0.642177	0.56	(0.49 - 0.63)	-0.0689679	0.0787903	0.215114
SL003753	Protein	DYNLL1	8.48967	8.45251	8.41878	0.52	(0.47 - 0.57)	-0.0371523	0.579372	0.777773	0.56	(0.49 - 0.62)	-0.0708825	0.455457	0.648199
SL007328	Protein	JAG1	9.1164	9.13247	9.16426	0.52	(0.46 - 0.57)	0.0160674	0.470578	0.692061	0.56	(0.49 - 0.62)	0.0478589	0.0873866	0.228612
SL000277	Protein	APOE	18.1339	18.1124	18.0786	0.52	(0.47 - 0.57)	-0.0215693	0.211666	0.458294	0.56	(0.5 - 0.63)	-0.0553683	0.0237845	0.0961622
SL002731	Protein	FAS	10.8411	10.8822	10.9214	0.52	(0.47 - 0.57)	0.0410962	0.208322	0.456725	0.56	(0.49 - 0.63)	0.0802151	0.0558559	0.170391				*
SL000346	Protein	CTSH	9.69372	9.69291	9.6159	0.52	(0.46 - 0.57)	-0.000810732	0.989715	0.995676	0.56	(0.49 - 0.63)	-0.0778197	0.311459	0.51778
LPC(P-18:1)	Lipid	LPC(P-18:1)	-10.2317	-10.244	-10.2963	0.51	(0.46 - 0.57)	-0.0122614	0.767663	0.890425	0.56	(0.49 - 0.63)	-0.0646086	0.261075	0.469337
SM 35:0	Lipid	SM 35:0	-6.58809	-6.5481	-6.4721	0.51	(0.46 - 0.56)	0.0399881	0.355069	0.591781	0.56	(0.49 - 0.62)	0.115987	0.0517751	0.162037
SL018256	Protein	CHKB	12.1458	12.1299	12.0243	0.51	(0.46 - 0.57)	-0.0159229	0.737074	0.8712	0.56	(0.49 - 0.62)	-0.121541	0.0361704	0.12842
SL006374	Protein	BMX	8.52583	8.55404	8.48064	0.51	(0.46 - 0.57)	0.0282059	0.581689	0.778966	0.56	(0.49 - 0.63)	-0.0451926	0.457716	0.650034
SL000051	Protein	CRP	15.9201	15.9169	16.074	0.51	(0.46 - 0.57)	-0.00322027	0.968998	0.989581	0.56	(0.49 - 0.63)	0.153911	0.111366	0.266895
SL014048	Protein	COL23A1	8.17791	8.21301	8.14602	0.51	(0.46 - 0.57)	0.0351003	0.300067	0.548824	0.56	(0.49 - 0.62)	-0.0318816	0.336906	0.542259
SL004932	Protein	PRDX5	9.14925	9.12005	9.10795	0.51	(0.46 - 0.57)	-0.029191	0.427858	0.660748	0.56	(0.49 - 0.63)	-0.0412946	0.353212	0.558921
SL004671	Protein	TNFRSF13C	11.7347	11.6655	11.6062	0.51	(0.46 - 0.57)	-0.0691348	0.245079	0.493662	0.56	(0.49 - 0.63)	-0.128407	0.0474571	0.153074				*
SL004355	Protein	CCL3L1	10.8765	10.8973	10.9981	0.5	(0.45 - 0.55)	0.0208381	0.598999	0.789632	0.56	(0.49 - 0.63)	0.121647	0.0322787	0.118908
SL014008	Protein	FUT5	12.8639	12.8766	12.9621	0.49	(0.44 - 0.54)	0.0126608	0.823663	0.91459	0.56	(0.49 - 0.63)	0.0981383	0.185539	0.374179
PE 38:6	Lipid	PE 38:6	0.390244	0.464455	0.529872	0.48	(0.42 - 0.53)	0.0742115	0.261457	0.508473	0.56	(0.49 - 0.62)	0.139628	0.0910984	0.234768
PE(P-18:1/20:4)	Lipid	PE(P-18:1/20:4)	-1.81565	-1.90853	-1.96703	0.48	(0.42 - 0.53)	-0.0928794	0.113508	0.322402	0.56	(0.49 - 0.62)	-0.151381	0.0388682	0.134123
SL009210	Protein	POMC	9.66753	9.72744	9.82939	0.48	(0.43 - 0.53)	0.059906	0.332531	0.573065	0.56	(0.49 - 0.62)	0.161855	0.0552729	0.169223
SL007221	Protein	STAT3	9.90224	9.98565	10.0246	0.46	(0.41 - 0.52)	0.0834088	0.227565	0.475382	0.56	(0.49 - 0.62)	0.122364	0.152469	0.328246
SL002722	Protein	CD38	9.43217	9.36523	9.39688	0.58	(0.53 - 0.63)	-0.0669424	0.090139	0.293516	0.55	(0.48 - 0.62)	-0.0352926	0.487867	0.67471
SL013754	Protein	RASA1	10.2229	10.2974	10.2483	0.58	(0.52 - 0.63)	0.0744354	0.194547	0.44014	0.55	(0.49 - 0.62)	0.0253855	0.682396	0.816749
SL004984	Protein	YWHAE	9.61797	9.71236	9.6971	0.57	(0.51 - 0.62)	0.0943944	0.00474522	0.0448012	0.55	(0.48 - 0.62)	0.0791361	0.0746692	0.20687	*
SL004301	Protein	XRCC6	7.96721	8.09819	8.06636	0.56	(0.51 - 0.61)	0.130975	0.000755154	0.0123904	0.55	(0.48 - 0.62)	0.0991498	0.0367019	0.1294	*
SL010510	Protein	PAK7	9.13878	9.12091	9.12729	0.56	(0.51 - 0.62)	-0.0178712	0.37253	0.609214	0.55	(0.48 - 0.62)	-0.0114849	0.630802	0.777576
SL007560	Protein	STAB2	9.47643	9.4198	9.44199	0.56	(0.51 - 0.61)	-0.0566306	0.0300185	0.145779	0.55	(0.48 - 0.62)	-0.0344418	0.308555	0.516807
SL004635	Protein	TNFSF8	11.0964	11.1654	11.1584	0.56	(0.5 - 0.61)	0.0690645	0.0567451	0.223021	0.55	(0.48 - 0.62)	0.0619984	0.205357	0.402614
SL003711	Protein	CASP3	12.5492	12.766	12.7264	0.56	(0.5 - 0.61)	0.216796	0.018126	0.104517	0.55	(0.48 - 0.62)	0.1772	0.119443	0.278811
SL018625	Protein	TLR4 LY96	12.1844	12.1265	12.1571	0.56	(0.51 - 0.62)	-0.0578432	0.0470002	0.193732	0.55	(0.48 - 0.61)	-0.0272728	0.455657	0.648199
SL011631	Protein	NACA	12.5754	12.7212	12.7025	0.56	(0.51 - 0.61)	0.145829	0.0158664	0.0975065	0.55	(0.48 - 0.62)	0.127104	0.0927856	0.236536
SL000670	Protein	GSTA3	8.25487	8.07329	8.06515	0.56	(0.51 - 0.61)	-0.181581	0.0307309	0.147964	0.55	(0.48 - 0.62)	-0.189717	0.0431775	0.144495
Cer(d18:2/24:0)	Lipid	Cer(d18:2/24:0)	-3.82891	-3.92819	-3.91919	0.55	(0.49 - 0.6)	-0.0992749	0.107209	0.315649	0.55	(0.48 - 0.62)	-0.0902711	0.255699	0.463162
LPC(O-24:2)	Lipid	LPC(O-24:2)	-10.2287	-10.3283	-10.3525	0.55	(0.5 - 0.6)	-0.0996419	0.0648825	0.240992	0.55	(0.49 - 0.62)	-0.123768	0.0823533	0.219522
PC 38:3	Lipid	PC 38:3	-2.41264	-2.51205	-2.52819	0.55	(0.5 - 0.6)	-0.0994111	0.0970703	0.304358	0.55	(0.49 - 0.62)	-0.115548	0.125366	0.288649
PC(O-36:0)	Lipid	PC(O-36:0)	-13.1221	-13.225	-13.2235	0.55	(0.49 - 0.6)	-0.102878	0.0764559	0.268629	0.55	(0.48 - 0.62)	-0.101363	0.173759	0.358988
PC(O-36:4)	Lipid	PC(O-36:4)	-3.9739	-4.02916	-4.02102	0.55	(0.5 - 0.6)	-0.0552585	0.192855	0.439247	0.55	(0.48 - 0.61)	-0.0471211	0.373949	0.578201
PC(O-38:6)	Lipid	PC(O-38:6)	-6.47353	-6.54993	-6.5457	0.55	(0.49 - 0.6)	-0.0764049	0.148149	0.381083	0.55	(0.48 - 0.61)	-0.0721739	0.26953	0.478975
SM 40:2	Lipid	SM 40:2	-0.924178	-1.00954	-1.01682	0.55	(0.5 - 0.6)	-0.0853626	0.0582382	0.22678	0.55	(0.49 - 0.62)	-0.0926463	0.106887	0.260287
SL004345	Protein	GDF11	9.81726	9.81943	9.76056	0.55	(0.49 - 0.6)	0.00216632	0.960487	0.988709	0.55	(0.48 - 0.61)	-0.0567012	0.167283	0.350296
SL001995	Protein	ANGPT1	9.18968	9.24084	9.22754	0.55	(0.49 - 0.6)	0.0511635	0.17338	0.418256	0.55	(0.48 - 0.61)	0.0378644	0.394333	0.598074
SL008416	Protein	MRC2	11.7987	11.7335	11.727	0.55	(0.5 - 0.6)	-0.0651781	0.0690962	0.254406	0.55	(0.48 - 0.61)	-0.0716723	0.0922984	0.235982
SL006916	Protein	LCK	8.40769	8.43466	8.45895	0.55	(0.5 - 0.6)	0.0269678	0.635859	0.815947	0.55	(0.48 - 0.62)	0.0512596	0.502108	0.684877
SL006480	Protein	PRSS3	8.76095	8.7191	8.73009	0.55	(0.49 - 0.6)	-0.0418459	0.298156	0.546754	0.55	(0.48 - 0.61)	-0.0308603	0.55733	0.727464
SL004350	Protein	IL17B	7.3391	7.26056	7.27809	0.55	(0.49 - 0.6)	-0.0785389	0.109277	0.317198	0.55	(0.48 - 0.62)	-0.061016	0.348939	0.554757
SL000589	Protein	CGA TSHB	9.02339	9.14946	9.15208	0.55	(0.5 - 0.61)	0.12607	0.057543	0.224591	0.55	(0.48 - 0.62)	0.128687	0.145311	0.31728
SL004068	Protein	GZMB	7.81092	7.77822	7.82019	0.55	(0.5 - 0.61)	-0.0326982	0.375416	0.610573	0.55	(0.48 - 0.62)	0.00927084	0.865839	0.933802
SL004708	Protein	PPBP	14.3206	14.4921	14.4642	0.55	(0.49 - 0.6)	0.171516	0.0698958	0.256487	0.55	(0.48 - 0.61)	0.143616	0.220651	0.42227
SL005764	Protein	CD163	11.8223	11.8789	11.8874	0.55	(0.49 - 0.6)	0.0566416	0.17772	0.423024	0.55	(0.48 - 0.62)	0.065191	0.231367	0.433973
SL005190	Protein	LILRB1	12.061	12.003	11.9661	0.55	(0.5 - 0.6)	-0.0579941	0.173907	0.418665	0.55	(0.49 - 0.62)	-0.0948895	0.187479	0.37719
SL003184	Protein	LEPR	10.8206	10.7377	10.7335	0.55	(0.5 - 0.6)	-0.0829465	0.236415	0.48312	0.55	(0.48 - 0.62)	-0.0871844	0.318977	0.524899
SL004248	Protein	GDNF	8.60811	8.57858	8.58976	0.55	(0.5 - 0.6)	-0.0295286	0.397483	0.630967	0.55	(0.48 - 0.62)	-0.0183477	0.703552	0.833803
SL005687	Protein	EIF5A	15.4613	15.5458	15.5486	0.55	(0.5 - 0.61)	0.0845195	0.0370434	0.165642	0.55	(0.49 - 0.62)	0.087365	0.0835855	0.222106
Cer(m18:1/20:0)	Lipid	Cer(m18:1/20:0)	-7.00222	-6.85836	-6.82426	0.54	(0.49 - 0.6)	0.14386	0.108701	0.317198	0.55	(0.48 - 0.61)	0.17796	0.105974	0.259183
DG 38:5 [NL-20:4]	Lipid	DG 38:5 [NL-20:4]	-1.32567	-1.45273	-1.51195	0.54	(0.48 - 0.59)	-0.127063	0.0939838	0.300251	0.55	(0.48 - 0.62)	-0.186284	0.0584708	0.174278
LPC(O-22:1)	Lipid	LPC(O-22:1)	-9.16228	-9.23673	-9.28192	0.54	(0.48 - 0.59)	-0.0744464	0.113479	0.322402	0.55	(0.49 - 0.62)	-0.119635	0.056835	0.171827
PC 38:6	Lipid	PC 38:6	-0.199617	-0.250255	-0.290648	0.54	(0.48 - 0.59)	-0.0506386	0.229934	0.477719	0.55	(0.48 - 0.62)	-0.0910307	0.101939	0.25297
PC(O-36:1)	Lipid	PC(O-36:1)	-7.34278	-7.4191	-7.44449	0.54	(0.48 - 0.59)	-0.0763208	0.0991398	0.307337	0.55	(0.49 - 0.62)	-0.101711	0.0896208	0.232467
PI 40:6	Lipid	PI 40:6	-2.13579	-2.05488	-2.02864	0.54	(0.48 - 0.59)	0.0809042	0.165708	0.410023	0.55	(0.48 - 0.62)	0.107149	0.141119	0.310208
S1P (d16:1)	Lipid	S1P (d16:1)	-7.50262	-7.56133	-7.57967	0.54	(0.49 - 0.6)	-0.0587095	0.118973	0.330697	0.55	(0.48 - 0.62)	-0.0770481	0.12351	0.285153
SM 34:0	Lipid	SM 34:0	-0.385352	-0.309901	-0.298208	0.54	(0.49 - 0.6)	0.0754514	0.0867562	0.289759	0.55	(0.48 - 0.62)	0.0871446	0.121044	0.280609
SM 36:1	Lipid	SM 36:1	-0.175044	-0.233145	-0.248968	0.54	(0.49 - 0.59)	-0.0581005	0.158621	0.400103	0.55	(0.49 - 0.62)	-0.0739241	0.134105	0.30098
SL017612	Protein	HSP90AA1 HSP90AB1	13.149	13.243	13.2604	0.54	(0.48 - 0.59)	0.0940041	0.135234	0.360481	0.55	(0.48 - 0.62)	0.111424	0.150817	0.326627
SL004591	Protein	CSF3R	9.87787	9.8116	9.81228	0.54	(0.49 - 0.59)	-0.0662715	0.128231	0.349532	0.55	(0.48 - 0.62)	-0.0655864	0.233408	0.43685
SL003199	Protein	TIE1	12.9674	12.914	12.9108	0.54	(0.49 - 0.59)	-0.0534201	0.0858543	0.288457	0.55	(0.48 - 0.62)	-0.0566457	0.128105	0.292564
SL000633	Protein	FASLG	9.0078	8.9987	8.96768	0.54	(0.49 - 0.59)	-0.00910221	0.887357	0.950335	0.55	(0.48 - 0.62)	-0.0401267	0.60474	0.76099
SL005215	Protein	CD33	11.7942	11.8576	11.908	0.54	(0.48 - 0.59)	0.063378	0.33449	0.575064	0.55	(0.49 - 0.62)	0.113872	0.151297	0.326627
SL005437	Protein	MEPE	8.07527	8.0528	8.06511	0.54	(0.48 - 0.59)	-0.0224684	0.37651	0.610946	0.55	(0.48 - 0.61)	-0.0101587	0.779282	0.885072
SL004636	Protein	FLT3	12.1757	12.0917	12.0668	0.54	(0.48 - 0.59)	-0.0840212	0.191865	0.439247	0.55	(0.48 - 0.61)	-0.108901	0.153209	0.328583
SL011071	Protein	PDGFC	8.85782	8.85988	8.86045	0.54	(0.48 - 0.59)	0.00206663	0.973211	0.991995	0.55	(0.48 - 0.61)	0.00262976	0.974203	0.987052
SL010514	Protein	PTK6	8.34668	8.2721	8.22349	0.54	(0.49 - 0.59)	-0.0745812	0.249896	0.498613	0.55	(0.48 - 0.61)	-0.123193	0.0791223	0.215672
SL005679	Protein	TPT1	13.936	14.0423	14.0527	0.54	(0.49 - 0.6)	0.106286	0.129099	0.349922	0.55	(0.48 - 0.61)	0.116692	0.181779	0.368434
SL000836	Protein	HBA1 HBB	11.0018	10.9022	10.8421	0.54	(0.49 - 0.59)	-0.0996175	0.251066	0.499765	0.55	(0.48 - 0.62)	-0.159711	0.109379	0.264829
SL007453	Protein	MAPK11	9.40079	9.51011	9.51693	0.54	(0.49 - 0.59)	0.109319	0.0141026	0.0920055	0.55	(0.48 - 0.62)	0.116141	0.058014	0.173428
SL005694	Protein	PRDX6	9.52697	9.61267	9.63994	0.54	(0.49 - 0.59)	0.0856989	0.1936	0.439247	0.55	(0.48 - 0.61)	0.112972	0.181819	0.368434
SL006476	Protein	NMT1	11.7947	11.8952	11.923	0.54	(0.48 - 0.59)	0.100439	0.140613	0.368656	0.55	(0.48 - 0.62)	0.128287	0.138406	0.306561
SL004134	Protein	CD27	12.5129	12.4631	12.4582	0.54	(0.49 - 0.6)	-0.0498723	0.112228	0.319997	0.55	(0.49 - 0.62)	-0.0547953	0.131271	0.296985			*
SL017528	Protein	RNASEH1	7.91802	7.75162	7.74993	0.54	(0.49 - 0.6)	-0.166399	0.0630043	0.236091	0.55	(0.48 - 0.61)	-0.168085	0.102086	0.25297
SL008837	Protein	CD63	8.91625	8.91288	8.93309	0.54	(0.49 - 0.59)	-0.00337429	0.926218	0.968442	0.55	(0.48 - 0.62)	0.0168361	0.787708	0.892098
AcylCarnitine 18:0	Lipid	AcylCarnitine 18:0	-6.07368	-6.0395	-5.99022	0.53	(0.47 - 0.58)	0.0341761	0.480266	0.697187	0.55	(0.48 - 0.62)	0.0834595	0.203179	0.39927
CE 20:3	Lipid	CE 20:3	-0.984019	-1.04334	-1.0792	0.53	(0.48 - 0.59)	-0.0593242	0.255742	0.505384	0.55	(0.48 - 0.62)	-0.0951828	0.168174	0.350882
Cer(m18:1/22:0)	Lipid	Cer(m18:1/22:0)	-5.90321	-5.80376	-5.73021	0.53	(0.48 - 0.58)	0.0994503	0.234919	0.482366	0.55	(0.48 - 0.62)	0.172997	0.113853	0.269992
LPC 15:0	Lipid	LPC 15:0	-4.11821	-4.17757	-4.18618	0.53	(0.48 - 0.59)	-0.0593593	0.131678	0.355487	0.55	(0.48 - 0.61)	-0.0679676	0.178285	0.366102
LPC 18:2	Lipid	LPC 18:2	0.551134	0.490999	0.4307	0.53	(0.47 - 0.58)	-0.0601358	0.28346	0.532275	0.55	(0.48 - 0.62)	-0.120434	0.111654	0.266895
LPC(O-16:0)	Lipid	LPC(O-16:0)	-4.76773	-4.81793	-4.84584	0.53	(0.48 - 0.58)	-0.0502038	0.188649	0.435542	0.55	(0.48 - 0.61)	-0.078108	0.135937	0.303079
LPS 18:1	Lipid	LPS 18:1	-7.97137	-8.04479	-8.07399	0.53	(0.48 - 0.59)	-0.0734194	0.212098	0.458294	0.55	(0.48 - 0.61)	-0.102625	0.167881	0.350703
PC 36:0	Lipid	PC 36:0	-8.60872	-8.66043	-8.68315	0.53	(0.48 - 0.59)	-0.0517067	0.257464	0.505384	0.55	(0.48 - 0.61)	-0.0744236	0.195663	0.386297
PC 36:1	Lipid	PC 36:1	-2.0426	-1.98019	-1.92829	0.53	(0.47 - 0.58)	0.0624082	0.340311	0.5756	0.55	(0.48 - 0.62)	0.114301	0.161392	0.340516
PC 37:6	Lipid	PC 37:6	-7.67921	-7.75208	-7.79627	0.53	(0.48 - 0.59)	-0.0728759	0.215694	0.462593	0.55	(0.48 - 0.62)	-0.117057	0.12556	0.288702
PC 38:5	Lipid	PC 38:5	-1.4262	-1.48431	-1.52917	0.53	(0.47 - 0.58)	-0.0581138	0.209579	0.457018	0.55	(0.49 - 0.62)	-0.102973	0.078127	0.214342
PE(P-16:0/18:1)	Lipid	PE(P-16:0/18:1)	-4.39524	-4.33784	-4.27785	0.53	(0.47 - 0.58)	0.0573992	0.315076	0.560503	0.55	(0.48 - 0.61)	0.117387	0.0819196	0.218711
PS 40:6	Lipid	PS 40:6	-6.01449	-5.93429	-5.88312	0.53	(0.48 - 0.59)	0.0802064	0.19216	0.439247	0.55	(0.48 - 0.61)	0.131371	0.0895711	0.232467
SM 40:3	Lipid	SM 40:3	-4.96796	-5.00703	-5.02856	0.53	(0.47 - 0.58)	-0.0390748	0.335926	0.575132	0.55	(0.48 - 0.62)	-0.0605983	0.271704	0.480817
SM 42:3	Lipid	SM 42:3	-0.186946	-0.247807	-0.269252	0.53	(0.48 - 0.59)	-0.0608615	0.142163	0.369625	0.55	(0.49 - 0.62)	-0.0823059	0.140013	0.30931
TG 50:1	Lipid	TG 50:1	0.204801	0.300698	0.381619	0.53	(0.48 - 0.58)	0.0958967	0.31826	0.563012	0.55	(0.49 - 0.62)	0.176818	0.130454	0.29615
TG 54:7	Lipid	TG 54:7	-2.17976	-2.33316	-2.41902	0.53	(0.48 - 0.59)	-0.153396	0.193632	0.439247	0.55	(0.48 - 0.61)	-0.239262	0.110638	0.26582
SL007311	Protein	SNAP25	10.9826	11.065	11.0005	0.53	(0.48 - 0.59)	0.082464	0.246236	0.494227	0.55	(0.49 - 0.62)	0.0179073	0.83401	0.914651
SL018971	Protein	ZNRF3	9.15801	9.12628	9.18464	0.53	(0.47 - 0.58)	-0.0317346	0.666801	0.8313	0.55	(0.49 - 0.62)	0.0266236	0.758025	0.873849
SL004692	Protein	CRLF1 CLCF1	8.81585	8.80725	8.82043	0.53	(0.48 - 0.59)	-0.00860387	0.797466	0.903982	0.55	(0.48 - 0.62)	0.00457541	0.925304	0.965882
SL000424	Protein	FGA FGB FGG	17.3658	17.3483	17.337	0.53	(0.48 - 0.59)	-0.0174871	0.310332	0.557936	0.55	(0.49 - 0.62)	-0.0288095	0.194512	0.384473
SL003309	Protein	LBP	16.561	16.5987	16.614	0.53	(0.48 - 0.58)	0.0377394	0.162641	0.406603	0.55	(0.48 - 0.62)	0.0530189	0.13512	0.302054
SL010619	Protein	TPSG1	7.5295	7.53657	7.47581	0.53	(0.47 - 0.58)	0.00707134	0.892007	0.951182	0.55	(0.49 - 0.62)	-0.0536871	0.235688	0.438187
SL003179	Protein	ITGA1 ITGB1	9.38163	9.43107	9.45028	0.53	(0.47 - 0.58)	0.049438	0.293335	0.543601	0.55	(0.48 - 0.62)	0.0686457	0.225609	0.426965
SL009412	Protein	DKK3	12.5435	12.575	12.6158	0.53	(0.47 - 0.58)	0.031557	0.341872	0.576599	0.55	(0.48 - 0.62)	0.0723748	0.0870936	0.228199
SL006805	Protein	CDC42BPB	10.2638	10.2468	10.2145	0.53	(0.48 - 0.59)	-0.016995	0.564963	0.765403	0.55	(0.48 - 0.61)	-0.0492445	0.105925	0.259183
SL006132	Protein	LMNB1	9.54265	9.59283	9.6505	0.53	(0.48 - 0.59)	0.0501751	0.150871	0.386107	0.55	(0.48 - 0.62)	0.107845	0.0916267	0.235333
SL009791	Protein	HNRNPAB	10.6424	10.6064	10.5872	0.53	(0.47 - 0.58)	-0.0359609	0.3365	0.575132	0.55	(0.48 - 0.61)	-0.0551654	0.250784	0.457201
SL000321	Protein	C5 C6	9.09431	9.07345	9.06638	0.53	(0.48 - 0.59)	-0.0208612	0.258086	0.505384	0.55	(0.48 - 0.61)	-0.0279309	0.244954	0.448507
SL014468	Protein	SH2D1A	12.5292	12.5482	12.5941	0.53	(0.47 - 0.58)	0.0190134	0.750679	0.881005	0.55	(0.48 - 0.61)	0.0649103	0.41272	0.61562
SL005185	Protein	IL23R	11.7038	11.6513	11.6378	0.53	(0.48 - 0.59)	-0.0524748	0.170292	0.414091	0.55	(0.48 - 0.61)	-0.0659553	0.179099	0.367021
SL016557	Protein	HMGCR	8.61371	8.60226	8.56812	0.53	(0.47 - 0.58)	-0.0114539	0.794634	0.903114	0.55	(0.48 - 0.62)	-0.0455977	0.38063	0.583496
SL016555	Protein	PDE11A	10.8823	10.856	10.8445	0.53	(0.48 - 0.58)	-0.0263249	0.342206	0.576599	0.55	(0.49 - 0.62)	-0.0377991	0.287041	0.495504
Cer(m18:1/24:1)	Lipid	Cer(m18:1/24:1)	-6.00455	-5.90772	-5.83547	0.52	(0.47 - 0.58)	0.0968375	0.201515	0.44693	0.55	(0.48 - 0.61)	0.169085	0.0862725	0.226398
LPC 19:0	Lipid	LPC 19:0	-7.81126	-7.8553	-7.91594	0.52	(0.46 - 0.57)	-0.0440332	0.321685	0.56415	0.55	(0.48 - 0.62)	-0.104674	0.0755956	0.209094
LPS 18:0	Lipid	LPS 18:0	-7.62876	-7.68663	-7.77476	0.52	(0.47 - 0.58)	-0.0578654	0.27685	0.523816	0.55	(0.49 - 0.62)	-0.145998	0.0415345	0.139827
PC 32:1	Lipid	PC 32:1	-2.20675	-2.14923	-2.03221	0.52	(0.46 - 0.57)	0.0575177	0.500542	0.710257	0.55	(0.49 - 0.62)	0.174541	0.114582	0.270074
PC 32:2	Lipid	PC 32:2	-5.36429	-5.29135	-5.2367	0.52	(0.47 - 0.58)	0.0729318	0.249273	0.497956	0.55	(0.48 - 0.62)	0.127582	0.124052	0.286014
PC 33:2	Lipid	PC 33:2	-4.8665	-4.81752	-4.75148	0.52	(0.47 - 0.58)	0.0489842	0.396872	0.630962	0.55	(0.48 - 0.62)	0.115022	0.12642	0.289498
PE(P-16:0/20:4)	Lipid	PE(P-16:0/20:4)	-1.13342	-1.19501	-1.25869	0.52	(0.47 - 0.57)	-0.061597	0.292784	0.543601	0.55	(0.48 - 0.62)	-0.125273	0.0736074	0.204936
PE(P-17:0/20:4)	Lipid	PE(P-17:0/20:4)	-4.32108	-4.35991	-4.40103	0.52	(0.46 - 0.57)	-0.0388315	0.534214	0.737599	0.55	(0.48 - 0.61)	-0.0799547	0.277257	0.485559
PE(P-18:0/20:3)	Lipid	PE(P-18:0/20:3)	-4.31959	-4.28193	-4.22339	0.52	(0.47 - 0.58)	0.0376579	0.576728	0.776011	0.55	(0.49 - 0.62)	0.0961971	0.234589	0.437145
PE(P-20:1/20:4)	Lipid	PE(P-20:1/20:4)	-6.22777	-6.30594	-6.38224	0.52	(0.47 - 0.58)	-0.07817	0.324812	0.567078	0.55	(0.48 - 0.61)	-0.15447	0.118422	0.277578
SL018587	Protein	ISLR2	12.5799	12.5453	12.5119	0.52	(0.47 - 0.58)	-0.0346564	0.318692	0.563012	0.55	(0.48 - 0.61)	-0.068017	0.110382	0.265735
SL004333	Protein	FGF10	8.11406	8.08825	8.07219	0.52	(0.47 - 0.58)	-0.0258158	0.525642	0.732345	0.55	(0.48 - 0.62)	-0.0418745	0.455627	0.648199
SL006372	Protein	YES1	10.313	10.3359	10.37	0.52	(0.47 - 0.58)	0.0229026	0.607095	0.793497	0.55	(0.49 - 0.62)	0.0570205	0.258916	0.466648
SL007261	Protein	METAP2	14.0461	13.9359	13.8095	0.52	(0.46 - 0.57)	-0.110204	0.163413	0.406726	0.55	(0.49 - 0.62)	-0.236594	0.0352228	0.126116
SL003918	Protein	KLK13	9.99127	9.96329	9.93114	0.52	(0.47 - 0.57)	-0.0279865	0.264208	0.511468	0.55	(0.48 - 0.62)	-0.0601345	0.044438	0.146012
SL010379	Protein	SEMA3A	10.8649	10.8309	10.7925	0.52	(0.47 - 0.58)	-0.0340098	0.293995	0.543601	0.55	(0.49 - 0.62)	-0.0723992	0.0447139	0.146163
SL009341	Protein	BSG	8.71775	8.68479	8.66683	0.52	(0.47 - 0.57)	-0.0329585	0.338383	0.575277	0.55	(0.48 - 0.61)	-0.0509162	0.201156	0.395756
SL004304	Protein	STX1A	8.50647	8.47426	8.45706	0.52	(0.46 - 0.57)	-0.0322119	0.217321	0.463763	0.55	(0.49 - 0.62)	-0.0494119	0.112216	0.267483
SL004360	Protein	NTF4	7.79578	7.7999	7.75037	0.52	(0.47 - 0.58)	0.00412323	0.927574	0.968851	0.55	(0.49 - 0.62)	-0.0454064	0.364684	0.566988
SL000347	Protein	SERPINA6	9.62873	9.58534	9.56193	0.52	(0.47 - 0.57)	-0.043388	0.206088	0.454092	0.55	(0.48 - 0.62)	-0.0667999	0.109944	0.265436
SL004156	Protein	TNFRSF10A	10.5678	10.5845	10.5291	0.52	(0.47 - 0.58)	0.0167597	0.784839	0.897414	0.55	(0.48 - 0.62)	-0.0386615	0.644494	0.788129
SL007429	Protein	GPNMB	12.3067	12.3559	12.3755	0.52	(0.47 - 0.58)	0.0491866	0.138005	0.364989	0.55	(0.48 - 0.61)	0.0687477	0.0862496	0.226398
SL003520	Protein	CALR	11.3796	11.4255	11.4226	0.52	(0.47 - 0.57)	0.0458758	0.278455	0.524816	0.55	(0.48 - 0.62)	0.0430521	0.323322	0.529471			*
SL004145	Protein	TNFRSF14	9.27678	9.32078	9.3513	0.52	(0.46 - 0.57)	0.044005	0.22713	0.475382	0.55	(0.48 - 0.61)	0.0745221	0.168861	0.351448
SL004594	Protein	TNNI2	12.5043	12.5579	12.6774	0.52	(0.46 - 0.57)	0.0535759	0.519616	0.728152	0.55	(0.48 - 0.62)	0.173074	0.121018	0.280609
DT	Echo Imaging	DT	237.97	237.801	229.967	0.51	(0.45 - 0.56)	-0.16966	0.979536	0.993609	0.55	(0.48 - 0.62)	-8.0035	0.355844	0.559012
Cer(d18:1/24:1)	Lipid	Cer(d18:1/24:1)	-2.41178	-2.3946	-2.34074	0.51	(0.46 - 0.57)	0.017183	0.696636	0.848821	0.55	(0.48 - 0.61)	0.0710426	0.193723	0.383812
LPC 20:0	Lipid	LPC 20:0	-8.10659	-8.12211	-8.19187	0.51	(0.46 - 0.57)	-0.0155256	0.725719	0.863099	0.55	(0.48 - 0.62)	-0.0852806	0.129233	0.294346
PE 38:3	Lipid	PE 38:3	-2.58093	-2.5435	-2.43935	0.51	(0.45 - 0.56)	0.0374302	0.590321	0.784564	0.55	(0.48 - 0.62)	0.141581	0.0990966	0.248477
PE 40:4	Lipid	PE 40:4	-5.55144	-5.51088	-5.39866	0.51	(0.46 - 0.57)	0.0405641	0.631906	0.812107	0.55	(0.48 - 0.62)	0.152782	0.133594	0.300231
PE(P-18:0/22:5)	Lipid	PE(P-18:0/22:5)	-4.22657	-4.20232	-4.09527	0.51	(0.45 - 0.56)	0.0242546	0.701546	0.852345	0.55	(0.48 - 0.61)	0.131302	0.0744459	0.206591
SL000055	Protein	CDH1	16.1419	16.1289	16.0976	0.51	(0.46 - 0.57)	-0.013001	0.581488	0.778966	0.55	(0.48 - 0.61)	-0.0442545	0.125791	0.288842
SL006777	Protein	FETUB	12.5192	12.5057	12.4786	0.51	(0.46 - 0.57)	-0.0135712	0.674078	0.835798	0.55	(0.48 - 0.61)	-0.0405854	0.313564	0.519231
SL007642	Protein	ANGPTL4	12.1521	12.135	12.1868	0.51	(0.46 - 0.57)	-0.0170551	0.702147	0.852463	0.55	(0.48 - 0.61)	0.0347215	0.50448	0.685529
SL000601	Protein	TF	17.8139	17.8175	17.7892	0.51	(0.46 - 0.56)	0.00362574	0.84536	0.926497	0.55	(0.48 - 0.61)	-0.0247596	0.269131	0.478769
SL012698	Protein	KIR2DL4	10.5832	10.5989	10.6773	0.51	(0.45 - 0.56)	0.0157214	0.778961	0.897414	0.55	(0.48 - 0.61)	0.0941111	0.161616	0.340563
SL005197	Protein	SCARB2	8.8597	8.82358	8.80273	0.51	(0.46 - 0.57)	-0.0361232	0.488404	0.704268	0.55	(0.48 - 0.62)	-0.0569696	0.354905	0.559012
SL002517	Protein	TNF	9.21747	9.21675	9.23262	0.51	(0.46 - 0.57)	-0.000723254	0.981084	0.993609	0.55	(0.48 - 0.61)	0.0151493	0.652206	0.795099
SL003735	Protein	TNFSF9	8.53218	8.6064	8.49865	0.5	(0.44 - 0.55)	0.0742222	0.0883676	0.291114	0.55	(0.48 - 0.62)	-0.033525	0.418475	0.620603
SL010459	Protein	FCGR2A	10.3424	10.2644	10.6347	0.5	(0.44 - 0.55)	-0.0780035	0.737187	0.8712	0.55	(0.48 - 0.62)	0.292328	0.297399	0.502604
SL005574	Protein	ACY1	11.7789	11.7394	11.6141	0.5	(0.44 - 0.55)	-0.0395345	0.585557	0.782285	0.55	(0.48 - 0.62)	-0.16486	0.0809099	0.217735
SL000426	Protein	FN1	13.6951	13.6845	13.591	0.5	(0.45 - 0.56)	-0.0106517	0.831591	0.916757	0.55	(0.49 - 0.62)	-0.104071	0.100999	0.251012
SL003198	Protein	TNC	14.3601	14.3415	14.4106	0.5	(0.45 - 0.56)	-0.0185815	0.666415	0.8313	0.55	(0.49 - 0.62)	0.0505248	0.324647	0.530613
SL014470	Protein	BCAR3	10.6841	10.6863	10.642	0.5	(0.44 - 0.55)	0.00219771	0.939896	0.97629	0.55	(0.48 - 0.62)	-0.0421084	0.189992	0.380302
LVEDVi	Echo Imaging	LVEDVi	63.9643	65.7362	68.735	0.49	(0.44 - 0.54)	1.77188	0.278758	0.524816	0.55	(0.48 - 0.62)	4.77072	0.0379424	0.132485				*
Hex1Cer(d18:1/18:0)	Lipid	Hex1Cer(d18:1/18:0)	-8.53505	-8.52979	-8.45179	0.49	(0.44 - 0.55)	0.00525901	0.922081	0.96649	0.55	(0.48 - 0.61)	0.0832655	0.190692	0.380483
SL004016	Protein	CXCL16	13.565	13.5732	13.6111	0.49	(0.44 - 0.55)	0.00813755	0.755911	0.884599	0.55	(0.48 - 0.62)	0.0460455	0.18133	0.368434
SL014108	Protein	LRRTM3	7.79974	7.80041	7.73382	0.49	(0.44 - 0.55)	0.000673632	0.989379	0.995676	0.55	(0.49 - 0.62)	-0.0659219	0.273488	0.481955
PC 31:1	Lipid	PC 31:1	-9.32082	-9.25269	-9.14787	0.48	(0.43 - 0.54)	0.0681232	0.407712	0.639871	0.55	(0.48 - 0.61)	0.172941	0.100438	0.250354
SL009349	Protein	FSTL1	14.9595	14.9866	15.0161	0.48	(0.43 - 0.54)	0.0271298	0.17008	0.414091	0.55	(0.49 - 0.62)	0.0566204	0.0309662	0.115869
SL006924	Protein	AGRP	10.6989	10.7297	10.7713	0.48	(0.43 - 0.54)	0.0308446	0.471716	0.692615	0.55	(0.48 - 0.62)	0.0724345	0.191166	0.38098
SL013490	Protein	BOC	10.313	10.3799	10.3859	0.48	(0.42 - 0.53)	0.0668484	0.133377	0.357006	0.55	(0.48 - 0.61)	0.0728414	0.180671	0.367872
SL007122	Protein	IDE	11.192	11.158	11.1283	0.47	(0.42 - 0.53)	-0.0339887	0.446617	0.674771	0.55	(0.48 - 0.62)	-0.0637116	0.272543	0.481563
SL010491	Protein	CAMK2A	8.57164	8.6626	8.60279	0.58	(0.52 - 0.63)	0.090956	0.0259468	0.132471	0.54	(0.48 - 0.61)	0.031147	0.50368	0.685361
SL004724	Protein	KAT6A	10.3928	10.3495	10.3679	0.57	(0.52 - 0.62)	-0.0433343	0.18442	0.431078	0.54	(0.47 - 0.61)	-0.0249781	0.506316	0.686737
SL010523	Protein	HIPK3	9.2214	9.06099	9.10872	0.57	(0.52 - 0.62)	-0.160413	0.0930653	0.298445	0.54	(0.47 - 0.61)	-0.112679	0.299691	0.504964
SL003176	Protein	CCL1	11.5353	11.5096	11.5369	0.56	(0.51 - 0.61)	-0.0256105	0.382378	0.61721	0.54	(0.47 - 0.61)	0.00167989	0.968403	0.985774
SL000320	Protein	C5	13.2941	13.2164	13.2509	0.56	(0.5 - 0.61)	-0.0776903	0.0993057	0.307337	0.54	(0.47 - 0.61)	-0.043193	0.489605	0.674905
SL006922	Protein	RAD51	11.1406	11.1121	11.1124	0.56	(0.51 - 0.61)	-0.0285469	0.458119	0.682735	0.54	(0.48 - 0.61)	-0.0281662	0.497891	0.680466
SL003341	Protein	FGG	16.0145	15.9711	15.9943	0.56	(0.51 - 0.62)	-0.0433769	0.0240335	0.126138	0.54	(0.47 - 0.61)	-0.0202317	0.442672	0.63864
Cer(d17:1/24:0)	Lipid	Cer(d17:1/24:0)	-5.71467	-5.81695	-5.81532	0.55	(0.5 - 0.6)	-0.102281	0.100578	0.308488	0.54	(0.48 - 0.61)	-0.100652	0.230633	0.433847
PE(O-38:5)	Lipid	PE(O-38:5)	-3.29962	-3.40332	-3.38784	0.55	(0.49 - 0.6)	-0.103703	0.0625946	0.235409	0.54	(0.47 - 0.6)	-0.0882207	0.184264	0.372195
SL000455	Protein	JUN	12.6219	12.5353	12.5632	0.55	(0.5 - 0.61)	-0.0866498	0.0370489	0.165642	0.54	(0.47 - 0.6)	-0.0587709	0.236481	0.438697
SL007953	Protein	PDXK	8.28045	8.36166	8.37484	0.55	(0.49 - 0.6)	0.0812165	0.0926995	0.298404	0.54	(0.47 - 0.6)	0.0943944	0.204712	0.401817
SL003191	Protein	PPBP	12.8131	12.9711	12.9531	0.55	(0.49 - 0.6)	0.157995	0.0949037	0.300914	0.54	(0.48 - 0.61)	0.13999	0.233417	0.43685
SL000338	Protein	CAST	12.7641	12.6862	12.675	0.55	(0.5 - 0.6)	-0.0779431	0.065971	0.243963	0.54	(0.48 - 0.61)	-0.0890823	0.0816473	0.218711
SL003166	Protein	ALCAM	14.0881	14.0506	14.0613	0.55	(0.49 - 0.6)	-0.0375316	0.0894265	0.292281	0.54	(0.47 - 0.6)	-0.0268248	0.337492	0.542685
SL003792	Protein	GRB2	14.4368	14.6284	14.5892	0.55	(0.5 - 0.61)	0.191628	0.0185005	0.105628	0.54	(0.47 - 0.61)	0.152394	0.119413	0.278811
SL014896	Protein	ANK2	9.15419	9.10439	9.04517	0.55	(0.49 - 0.6)	-0.0498064	0.490143	0.704419	0.54	(0.48 - 0.61)	-0.109027	0.151331	0.326627
Cer(d17:1/24:1)	Lipid	Cer(d17:1/24:1)	-6.57947	-6.6849	-6.68772	0.54	(0.49 - 0.59)	-0.105427	0.08547	0.287738	0.54	(0.47 - 0.61)	-0.10824	0.181617	0.368434
Cer(d18:1/24:0)	Lipid	Cer(d18:1/24:0)	-1.50066	-1.56334	-1.55283	0.54	(0.49 - 0.6)	-0.0626781	0.196893	0.441358	0.54	(0.47 - 0.61)	-0.0521715	0.386946	0.589749
Cer(m18:1/23:0)	Lipid	Cer(m18:1/23:0)	-6.88845	-6.75639	-6.70094	0.54	(0.48 - 0.59)	0.132063	0.102095	0.310582	0.54	(0.47 - 0.61)	0.187513	0.0702938	0.200233
Sph (d18:1)	Lipid	Sph (d18:1)	-7.48036	-7.51722	-7.50771	0.54	(0.49 - 0.6)	-0.0368657	0.187518	0.434905	0.54	(0.47 - 0.6)	-0.0273477	0.449478	0.642655
SL001880	Protein	IFNB1	9.12922	9.22748	9.22726	0.54	(0.48 - 0.59)	0.0982561	0.0860946	0.28869	0.54	(0.47 - 0.61)	0.0980331	0.16458	0.346376
SL000045	Protein	IGFBP3	10.5268	10.4613	10.4615	0.54	(0.49 - 0.59)	-0.0654673	0.105643	0.313774	0.54	(0.47 - 0.61)	-0.0653299	0.221685	0.422346
SL004639	Protein	NTRK3	11.8989	11.961	11.951	0.54	(0.49 - 0.6)	0.0620369	0.117277	0.32706	0.54	(0.47 - 0.61)	0.0520549	0.315799	0.521214
SL005236	Protein	NOV	9.35651	9.33899	9.33945	0.54	(0.48 - 0.59)	-0.0175238	0.447185	0.674771	0.54	(0.48 - 0.61)	-0.0170619	0.591686	0.752408
SL004336	Protein	FGF18	8.44855	8.46283	8.508	0.54	(0.49 - 0.59)	0.0142736	0.774062	0.894166	0.54	(0.47 - 0.61)	0.0594492	0.446859	0.639993
SL004704	Protein	COMMD7	10.5537	10.5895	10.594	0.54	(0.48 - 0.59)	0.0358	0.278223	0.524816	0.54	(0.48 - 0.61)	0.0402098	0.309332	0.517049
SL006911	Protein	CHEK1	9.21316	9.17118	9.13451	0.54	(0.48 - 0.59)	-0.0419755	0.338203	0.575277	0.54	(0.47 - 0.61)	-0.078648	0.071257	0.200886
SL000554	Protein	PRKCD	12.0211	12.0913	12.0723	0.54	(0.49 - 0.59)	0.0702381	0.0979509	0.305828	0.54	(0.47 - 0.61)	0.0512698	0.313689	0.519231
SL005205	Protein	NCR3	9.01215	9.07776	9.08812	0.54	(0.49 - 0.59)	0.0656017	0.0210245	0.115362	0.54	(0.48 - 0.61)	0.0759702	0.0661865	0.191533
SL004469	Protein	APP	14.3656	14.4369	14.4216	0.54	(0.48 - 0.59)	0.0712991	0.23201	0.480296	0.54	(0.47 - 0.6)	0.0560306	0.446112	0.639993
SL008759	Protein	GP6	13.3895	13.5054	13.4924	0.54	(0.49 - 0.6)	0.115963	0.0877477	0.290772	0.54	(0.47 - 0.6)	0.102893	0.226422	0.428024
SL000640	Protein	NID1	12.2298	12.2624	12.2736	0.54	(0.48 - 0.59)	0.0325722	0.212178	0.458294	0.54	(0.47 - 0.61)	0.0437785	0.21698	0.417174
SL004438	Protein	CST6	12.9586	13.0619	13.0905	0.54	(0.49 - 0.59)	0.103286	0.039784	0.171956	0.54	(0.47 - 0.61)	0.13195	0.0714078	0.200886
SL004298	Protein	GZMA	11.6896	11.6376	11.643	0.54	(0.49 - 0.6)	-0.0520348	0.175612	0.421163	0.54	(0.47 - 0.61)	-0.0466435	0.355906	0.559012
SL008193	Protein	NID2	11.1311	11.1645	11.171	0.54	(0.48 - 0.59)	0.0333889	0.19517	0.44037	0.54	(0.47 - 0.6)	0.0398941	0.233918	0.437145
SL000076	Protein	CDKN1B	9.97035	10.0064	10.0647	0.54	(0.48 - 0.59)	0.0360637	0.677417	0.837215	0.54	(0.48 - 0.61)	0.0943508	0.41097	0.614093
SL004844	Protein	EPHA5	9.50359	9.56017	9.59298	0.54	(0.48 - 0.59)	0.056587	0.234921	0.482366	0.54	(0.48 - 0.61)	0.0893895	0.147103	0.320367
SL000517	Protein	CCL13	8.8594	8.81488	8.79955	0.54	(0.48 - 0.59)	-0.0445214	0.351279	0.587202	0.54	(0.48 - 0.61)	-0.0598495	0.276596	0.484904
SL008039	Protein	AKR1A1	12.2634	12.3108	12.3092	0.54	(0.49 - 0.6)	0.0473355	0.332988	0.573065	0.54	(0.48 - 0.61)	0.0458079	0.439501	0.637012
SL013488	Protein	CLEC1B	13.0293	13.1038	13.1192	0.54	(0.49 - 0.59)	0.0745243	0.106675	0.315303	0.54	(0.48 - 0.61)	0.089895	0.122942	0.284618
SL014269	Protein	KIR3DL2	8.92442	8.84614	8.84449	0.54	(0.49 - 0.6)	-0.0782748	0.263158	0.510606	0.54	(0.48 - 0.61)	-0.0799287	0.377496	0.58055
SL013928	Protein	PPIE	10.8092	10.9255	10.9249	0.54	(0.48 - 0.59)	0.116317	0.103855	0.313632	0.54	(0.47 - 0.6)	0.115623	0.193143	0.383562
SL004157	Protein	TNFRSF10B	8.59218	8.66378	8.66979	0.54	(0.48 - 0.59)	0.0716021	0.0503844	0.204196	0.54	(0.48 - 0.61)	0.077612	0.0941159	0.239182
SL007195	Protein	CD70	8.24458	8.20209	8.16751	0.54	(0.49 - 0.6)	-0.0424893	0.363507	0.600515	0.54	(0.48 - 0.61)	-0.0770693	0.110732	0.26582
CE 18:2	Lipid	CE 18:2	3.11348	3.15584	3.18292	0.53	(0.48 - 0.58)	0.042366	0.289874	0.540715	0.54	(0.48 - 0.61)	0.0694459	0.177608	0.365155
CE 20:5	Lipid	CE 20:5	-1.75977	-1.84673	-1.83418	0.53	(0.48 - 0.58)	-0.0869569	0.310774	0.558139	0.54	(0.47 - 0.61)	-0.0744103	0.476241	0.666816
Cer(d18:2/22:0)	Lipid	Cer(d18:2/22:0)	-5.70354	-5.75247	-5.76774	0.53	(0.48 - 0.59)	-0.0489347	0.429297	0.660758	0.54	(0.48 - 0.61)	-0.0642045	0.401633	0.604416
LPE 18:1	Lipid	LPE 18:1	-1.90562	-1.84715	-1.8368	0.53	(0.48 - 0.59)	0.058468	0.361222	0.597324	0.54	(0.47 - 0.6)	0.0688131	0.408793	0.612464
LPE 22:6	Lipid	LPE 22:6	-2.20422	-2.2552	-2.29407	0.53	(0.48 - 0.58)	-0.050985	0.296613	0.546103	0.54	(0.48 - 0.61)	-0.0898488	0.159384	0.337121
PC 40:5	Lipid	PC 40:5	-3.99013	-4.0417	-4.0676	0.53	(0.47 - 0.58)	-0.0515727	0.275459	0.522475	0.54	(0.47 - 0.6)	-0.0774742	0.180378	0.367872
SM 41:1	Lipid	SM 41:1	-0.198813	-0.270085	-0.286658	0.53	(0.48 - 0.59)	-0.071272	0.138507	0.365744	0.54	(0.47 - 0.61)	-0.0878442	0.15632	0.333142
SL008522	Protein	SEMA5A	12.7044	12.6513	12.6464	0.53	(0.48 - 0.59)	-0.0530354	0.177468	0.423024	0.54	(0.47 - 0.61)	-0.0579431	0.218059	0.418772
SL000053	Protein	PLAT	9.26264	9.20237	9.19054	0.53	(0.48 - 0.58)	-0.0602702	0.211866	0.458294	0.54	(0.47 - 0.61)	-0.0721049	0.261903	0.46937
SL003307	Protein	IL2RG	11.6769	11.7367	11.7765	0.53	(0.47 - 0.58)	0.0598028	0.322467	0.56415	0.54	(0.47 - 0.61)	0.0995865	0.184336	0.372195
SL004356	Protein	CCL4L1	9.04753	9.16408	9.15491	0.53	(0.48 - 0.59)	0.116558	0.0872591	0.290291	0.54	(0.47 - 0.6)	0.107384	0.255226	0.463162
SL004343	Protein	FLT3LG	8.93976	8.86896	8.85782	0.53	(0.48 - 0.59)	-0.0707949	0.171481	0.415191	0.54	(0.48 - 0.61)	-0.0819418	0.154882	0.331055
SL006803	Protein	ANGPTL3	8.70716	8.69477	8.67683	0.53	(0.48 - 0.58)	-0.0123879	0.66414	0.830473	0.54	(0.47 - 0.61)	-0.0303255	0.344804	0.550773
SL004858	Protein	GFRA1	10.2662	10.2585	10.2914	0.53	(0.48 - 0.58)	-0.00769379	0.843163	0.92529	0.54	(0.47 - 0.6)	0.0252206	0.700006	0.831349
SL003187	Protein	CCL22	10.5225	10.4764	10.4771	0.53	(0.47 - 0.58)	-0.0460147	0.312965	0.558512	0.54	(0.47 - 0.61)	-0.0453581	0.489601	0.674905
SL004820	Protein	PGAM1	10.3229	10.3025	10.2763	0.53	(0.48 - 0.59)	-0.0204223	0.818685	0.914261	0.54	(0.48 - 0.61)	-0.0466051	0.693966	0.825917
SL005181	Protein	IL20RA	8.13911	8.13696	8.12885	0.53	(0.47 - 0.58)	-0.00214649	0.944543	0.978711	0.54	(0.47 - 0.61)	-0.0102658	0.823025	0.906132
SL005169	Protein	ICAM5	9.92563	9.96485	9.96522	0.53	(0.47 - 0.58)	0.0392171	0.336908	0.575132	0.54	(0.47 - 0.61)	0.0395847	0.441142	0.638137
SL003331	Protein	MMP16	9.48807	9.46769	9.46287	0.53	(0.48 - 0.59)	-0.0203829	0.605763	0.793497	0.54	(0.47 - 0.6)	-0.0252037	0.592897	0.752815
SL000406	Protein	CCL11	13.3553	13.4125	13.4153	0.53	(0.48 - 0.58)	0.0572097	0.151016	0.386107	0.54	(0.47 - 0.61)	0.059933	0.210246	0.410295
SL007295	Protein	CDH15	12.1111	12.0686	12.069	0.53	(0.48 - 0.59)	-0.0424498	0.0953585	0.301226	0.54	(0.47 - 0.6)	-0.0420254	0.166602	0.349327
SL000305	Protein	NGF	9.52679	9.59413	9.6009	0.53	(0.47 - 0.58)	0.0673365	0.39135	0.625125	0.54	(0.47 - 0.61)	0.0741029	0.432334	0.630623
SL003700	Protein	BAD	13.1376	13.211	13.2183	0.53	(0.48 - 0.59)	0.0733806	0.243477	0.492168	0.54	(0.47 - 0.6)	0.080676	0.296144	0.501989
SL017529	Protein	KEAP1	8.88324	8.9182	8.9453	0.53	(0.47 - 0.58)	0.0349526	0.543238	0.747161	0.54	(0.48 - 0.61)	0.0620587	0.431988	0.630623
AcylCarnitine 16:0	Lipid	AcylCarnitine 16:0	-4.62503	-4.58755	-4.54178	0.52	(0.47 - 0.57)	0.0374878	0.400094	0.633968	0.54	(0.47 - 0.61)	0.0832512	0.180162	0.367872
Hex1Cer(d18:1/24:1)	Lipid	Hex1Cer(d18:1/24:1)	-3.36515	-3.30609	-3.2672	0.52	(0.47 - 0.58)	0.0590602	0.268873	0.517488	0.54	(0.48 - 0.61)	0.0979425	0.154949	0.331055
LPC 16:0	Lipid	LPC 16:0	2.5889	2.54409	2.49739	0.52	(0.47 - 0.58)	-0.0448151	0.212726	0.458294	0.54	(0.47 - 0.61)	-0.0915083	0.0699492	0.200024
LPS 16:0	Lipid	LPS 16:0	-5.55816	-5.59013	-5.64484	0.52	(0.46 - 0.57)	-0.0319667	0.492032	0.705461	0.54	(0.47 - 0.6)	-0.0866781	0.169941	0.353122
PE(P-18:0/22:6)	Lipid	PE(P-18:0/22:6)	-1.89347	-1.93892	-1.96532	0.52	(0.47 - 0.57)	-0.0454502	0.437404	0.667159	0.54	(0.47 - 0.6)	-0.0718491	0.321196	0.527522
PE(P-18:1/20:3)	Lipid	PE(P-18:1/20:3)	-6.1651	-6.12552	-6.07721	0.52	(0.47 - 0.58)	0.0395807	0.544777	0.747746	0.54	(0.48 - 0.61)	0.087896	0.271615	0.480817
PI 40:4	Lipid	PI 40:4	-4.49445	-4.46902	-4.43122	0.52	(0.47 - 0.57)	0.0254347	0.640321	0.819184	0.54	(0.47 - 0.6)	0.0632313	0.333914	0.538973
SM 42:2	Lipid	SM 42:2	1.32495	1.28898	1.27001	0.52	(0.47 - 0.58)	-0.0359709	0.388332	0.622067	0.54	(0.47 - 0.61)	-0.0549465	0.307757	0.515981
TG 54:3	Lipid	TG 54:3	0.772385	0.719004	0.664069	0.52	(0.47 - 0.58)	-0.0533811	0.331023	0.571679	0.54	(0.47 - 0.61)	-0.108316	0.112786	0.268463
SL007272	Protein	HK2	9.3167	9.35426	9.42097	0.52	(0.47 - 0.58)	0.0375621	0.543349	0.747161	0.54	(0.47 - 0.6)	0.104267	0.187399	0.37719
SL004685	Protein	PSPN	7.8628	7.86695	7.86097	0.52	(0.46 - 0.57)	0.00415774	0.917871	0.964678	0.54	(0.47 - 0.61)	-0.00182514	0.974117	0.987052
SL005229	Protein	ULBP3	9.7435	9.76357	9.79069	0.52	(0.47 - 0.58)	0.0200737	0.643928	0.822553	0.54	(0.47 - 0.6)	0.0471932	0.380826	0.583496
SL006923	Protein	TBP	8.99138	9.01822	9.01646	0.52	(0.46 - 0.57)	0.0268389	0.392742	0.626755	0.54	(0.47 - 0.61)	0.0250862	0.602191	0.758914
SL000396	Protein	CYCS	10.8414	10.8569	10.7602	0.52	(0.46 - 0.57)	0.0155193	0.761343	0.887359	0.54	(0.47 - 0.61)	-0.0811651	0.152813	0.328512
SL000668	Protein	CD36	13.3211	13.3513	13.3733	0.52	(0.47 - 0.58)	0.030223	0.433557	0.664892	0.54	(0.47 - 0.61)	0.0521634	0.291553	0.499214
SL005059	Protein	TGFBR3	14.8731	14.9026	14.9251	0.52	(0.47 - 0.57)	0.0294544	0.272462	0.520043	0.54	(0.47 - 0.61)	0.0520364	0.133011	0.299322
SL004271	Protein	GFAP	9.1392	9.14205	9.08435	0.52	(0.47 - 0.57)	0.00285105	0.96307	0.989416	0.54	(0.48 - 0.61)	-0.0548455	0.41439	0.617021
SL010371	Protein	ENTPD1	10.4572	10.457	10.4242	0.52	(0.46 - 0.57)	-0.00024711	0.993129	0.995676	0.54	(0.47 - 0.61)	-0.0329897	0.242718	0.447321
SL001998	Protein	TFPI	16.047	16.0272	16.0105	0.52	(0.47 - 0.57)	-0.0198232	0.453296	0.680156	0.54	(0.47 - 0.61)	-0.0364812	0.310052	0.517049
SL010612	Protein	DKK4	12.7934	12.822	12.8543	0.52	(0.46 - 0.57)	0.0285897	0.460431	0.684677	0.54	(0.47 - 0.6)	0.0609203	0.25023	0.456972
SL008760	Protein	SLITRK1	10.5808	10.5616	10.535	0.52	(0.46 - 0.57)	-0.0191635	0.455922	0.681783	0.54	(0.47 - 0.61)	-0.0457473	0.130551	0.29615
SL000254	Protein	ALB	13.127	13.0953	13.0669	0.52	(0.47 - 0.57)	-0.0316488	0.221435	0.468604	0.54	(0.48 - 0.61)	-0.0600451	0.0608103	0.179667
SL003974	Protein	PROC	9.73063	9.71522	9.66054	0.52	(0.46 - 0.57)	-0.0154089	0.670697	0.832825	0.54	(0.48 - 0.61)	-0.0700969	0.056746	0.171827
SL004642	Protein	ADAM9	9.51914	9.64225	9.63118	0.52	(0.47 - 0.57)	0.123112	0.0499171	0.202788	0.54	(0.47 - 0.61)	0.112042	0.216378	0.417127
SL001943	Protein	IL6R	13.7857	13.7604	13.7385	0.52	(0.47 - 0.58)	-0.025308	0.489319	0.704419	0.54	(0.47 - 0.6)	-0.0472033	0.341984	0.548342
SL005493	Protein	PON1	7.47828	7.44995	7.45271	0.52	(0.47 - 0.57)	-0.0283369	0.465704	0.689089	0.54	(0.47 - 0.6)	-0.0255747	0.571108	0.736211
SL004866	Protein	CA1	14.6653	14.621	14.5881	0.52	(0.47 - 0.57)	-0.0443223	0.407932	0.639871	0.54	(0.47 - 0.61)	-0.0772351	0.259003	0.466648
SL004899	Protein	HSPA8	10.9522	10.9867	10.9982	0.52	(0.47 - 0.58)	0.0345288	0.192887	0.439247	0.54	(0.48 - 0.61)	0.046014	0.168708	0.351448
SL004829	Protein	S100A7	8.43621	8.44006	8.49102	0.52	(0.46 - 0.57)	0.0038538	0.960628	0.988709	0.54	(0.47 - 0.61)	0.0548154	0.579543	0.744813
SL000526	Protein	MMP8	10.3544	10.3333	10.2946	0.52	(0.47 - 0.57)	-0.0211289	0.619322	0.801419	0.54	(0.47 - 0.6)	-0.0598819	0.261329	0.469337
CE 20:2	Lipid	CE 20:2	-5.87529	-5.85355	-5.82229	0.51	(0.46 - 0.56)	0.0217406	0.62886	0.808816	0.54	(0.47 - 0.6)	0.0530021	0.346095	0.551793
Cer(m18:0/24:1)	Lipid	Cer(m18:0/24:1)	-6.75608	-6.72612	-6.6551	0.51	(0.45 - 0.56)	0.0299589	0.590976	0.784564	0.54	(0.48 - 0.61)	0.10098	0.166207	0.348932
TG 49:1	Lipid	TG 49:1	-2.31433	-2.26081	-2.15284	0.51	(0.46 - 0.56)	0.0535242	0.590461	0.784564	0.54	(0.47 - 0.6)	0.161493	0.190233	0.380302
SL003308	Protein	IL4R	7.97178	7.99155	7.95922	0.51	(0.46 - 0.56)	0.0197618	0.750329	0.881005	0.54	(0.47 - 0.61)	-0.0125609	0.872994	0.936737
SL004008	Protein	PRTN3	12.1808	12.2062	12.2532	0.51	(0.46 - 0.57)	0.0254311	0.609828	0.794726	0.54	(0.47 - 0.6)	0.0724244	0.26909	0.478769
SL000089	Protein	TGFB3	8.88537	8.88869	8.91257	0.51	(0.46 - 0.56)	0.00332036	0.898534	0.955046	0.54	(0.48 - 0.61)	0.027206	0.322517	0.528666
SL005508	Protein	CA9	10.712	10.7409	10.8183	0.51	(0.45 - 0.56)	0.028939	0.60628	0.793497	0.54	(0.48 - 0.61)	0.106331	0.155983	0.332843
SL000377	Protein	CKB	9.61164	9.52426	9.56269	0.51	(0.45 - 0.56)	-0.0873859	0.284936	0.53386	0.54	(0.47 - 0.61)	-0.0489468	0.600616	0.757494
SL000479	Protein	IL3	10.4975	10.4727	10.4609	0.51	(0.46 - 0.57)	-0.024849	0.385311	0.620167	0.54	(0.47 - 0.61)	-0.0366318	0.282526	0.490214
SL016129	Protein	FAM107B	10.7859	10.808	10.7498	0.51	(0.46 - 0.57)	0.0221017	0.530472	0.733189	0.54	(0.47 - 0.6)	-0.0360427	0.377173	0.58055
Cer(m18:2/18:0)	Lipid	Cer(m18:2/18:0)	-7.02935	-7.00289	-6.94338	0.5	(0.44 - 0.55)	0.026459	0.611591	0.795457	0.54	(0.47 - 0.61)	0.0859692	0.149888	0.325174
Cer(m18:2/24:1)	Lipid	Cer(m18:2/24:1)	-2.50116	-2.49543	-2.43494	0.5	(0.45 - 0.56)	0.00573554	0.902281	0.955423	0.54	(0.47 - 0.61)	0.066223	0.23782	0.439733
Hex1Cer(d18:1/23:0)	Lipid	Hex1Cer(d18:1/23:0)	-4.42034	-4.41339	-4.34811	0.5	(0.45 - 0.56)	0.00694046	0.894131	0.952762	0.54	(0.47 - 0.61)	0.0722263	0.301431	0.507388
LPC 20:1	Lipid	LPC 20:1	-7.07313	-7.06167	-7.1269	0.5	(0.44 - 0.55)	0.0114598	0.772935	0.894086	0.54	(0.47 - 0.6)	-0.0537656	0.290645	0.49867
SL011069	Protein	PRSS27	12.8525	12.8448	12.808	0.5	(0.45 - 0.55)	-0.00766828	0.766468	0.889903	0.54	(0.47 - 0.61)	-0.044478	0.165716	0.348333
SL010505	Protein	MATK	8.65965	8.68132	8.70477	0.5	(0.45 - 0.56)	0.0216743	0.594205	0.787393	0.54	(0.47 - 0.61)	0.0451245	0.380587	0.583496
SL011533	Protein	SGTA	11.3141	11.3222	11.1951	0.5	(0.44 - 0.55)	0.00817542	0.905785	0.956726	0.54	(0.48 - 0.61)	-0.118989	0.176457	0.363674
SL012754	Protein	SMPDL3A	11.9277	11.8999	11.8478	0.5	(0.45 - 0.55)	-0.0278376	0.494759	0.706508	0.54	(0.47 - 0.61)	-0.0799767	0.0966117	0.243692
SL003300	Protein	CCL16	15.0218	15.0168	15.0625	0.5	(0.44 - 0.55)	-0.00506315	0.899388	0.95508	0.54	(0.47 - 0.61)	0.0406956	0.44141	0.638137
SL008178	Protein	DPT	12.259	12.2612	12.3065	0.5	(0.44 - 0.55)	0.00212972	0.946827	0.979876	0.54	(0.47 - 0.6)	0.0474239	0.230942	0.433847
SL000142	Protein	TYMS	8.82391	8.87435	8.79312	0.5	(0.45 - 0.56)	0.0504349	0.316584	0.561657	0.54	(0.48 - 0.61)	-0.0307877	0.608983	0.761792
SL002542	Protein	KRAS	10.1904	10.1911	10.1497	0.5	(0.44 - 0.55)	0.000738645	0.981139	0.993609	0.54	(0.47 - 0.6)	-0.0406253	0.288897	0.496791
SL005403	Protein	LMAN2	13.9999	13.971	13.922	0.5	(0.45 - 0.55)	-0.0289105	0.321942	0.56415	0.54	(0.47 - 0.61)	-0.0779643	0.047462	0.153074
Cer(d18:1/20:0)	Lipid	Cer(d18:1/20:0)	-5.3653	-5.34415	-5.29939	0.49	(0.44 - 0.54)	0.0211552	0.688855	0.842377	0.54	(0.47 - 0.6)	0.0659117	0.31023	0.517049
SL000312	Protein	C3	16.4045	16.4086	16.3731	0.49	(0.44 - 0.54)	0.00410662	0.936883	0.974958	0.54	(0.47 - 0.61)	-0.0314473	0.640769	0.785848
SL003733	Protein	DIABLO	12.0226	12.0539	12.1183	0.49	(0.44 - 0.55)	0.0313358	0.308232	0.55653	0.54	(0.47 - 0.61)	0.0957197	0.0805913	0.217224
SL007324	Protein	CSNK2A1	9.15086	9.13472	9.10089	0.49	(0.44 - 0.55)	-0.0161381	0.689861	0.842876	0.54	(0.48 - 0.61)	-0.049965	0.355466	0.559012
SL016928	Protein	SLAMF7	15.4907	15.576	15.6441	0.49	(0.43 - 0.54)	0.085249	0.293877	0.543601	0.54	(0.48 - 0.61)	0.153353	0.0976856	0.246034
SL005688	Protein	YWHAZ	17.1895	17.2019	17.1606	0.49	(0.44 - 0.55)	0.0123308	0.782152	0.897414	0.54	(0.47 - 0.6)	-0.0289566	0.588979	0.751794
SM 44:3	Lipid	SM 44:3	-6.94	-7.00258	-7.01302	0.48	(0.42 - 0.53)	-0.0625853	0.183301	0.429652	0.54	(0.48 - 0.61)	-0.0730182	0.212194	0.41172
SL003770	Protein	SFRP1	12.1844	12.2671	12.3513	0.48	(0.43 - 0.54)	0.0827009	0.125024	0.342111	0.54	(0.47 - 0.61)	0.166804	0.0727335	0.203443
SL004363	Protein	CLEC11A	11.3083	11.3385	11.3697	0.48	(0.42 - 0.53)	0.030223	0.436686	0.667105	0.54	(0.47 - 0.61)	0.0614237	0.199057	0.392081
SL014070	Protein	SLITRK5	10.7372	10.8033	10.8283	0.48	(0.43 - 0.54)	0.0661099	0.208917	0.456797	0.54	(0.47 - 0.61)	0.0910662	0.183537	0.37147
SL013872	Protein	LRP1B	15.0898	15.0563	15.0438	0.48	(0.43 - 0.54)	-0.0335447	0.23219	0.480296	0.54	(0.48 - 0.61)	-0.0460838	0.180543	0.367872
SL010508	Protein	PAK3	10.0341	10.0207	10.0584	0.56	(0.5 - 0.61)	-0.0134268	0.680015	0.837628	0.53	(0.46 - 0.6)	0.0242709	0.661916	0.802583
SL004921	Protein	NME2	14.4558	14.6414	14.5697	0.56	(0.5 - 0.61)	0.185645	0.0145805	0.0930918	0.53	(0.47 - 0.6)	0.113951	0.216709	0.417127
PS 38:4	Lipid	PS 38:4	-3.32998	-3.18223	-3.20953	0.55	(0.5 - 0.6)	0.14775	0.0717931	0.259253	0.53	(0.47 - 0.6)	0.120446	0.270959	0.480817
SL000450	Protein	HSPD1	12.6078	12.7069	12.6506	0.55	(0.5 - 0.61)	0.0991036	0.212406	0.458294	0.53	(0.47 - 0.6)	0.0427674	0.662962	0.802583
SL005199	Protein	MICA	8.51629	8.64976	8.60708	0.55	(0.49 - 0.6)	0.133476	0.098082	0.305828	0.53	(0.47 - 0.6)	0.0907949	0.354261	0.559012
SL004625	Protein	ADAMTS4	7.49755	7.41623	7.43157	0.55	(0.5 - 0.61)	-0.0813205	0.0848831	0.28748	0.53	(0.47 - 0.6)	-0.0659821	0.209223	0.409245
SL005629	Protein	NAGK	9.9119	9.86313	9.88797	0.55	(0.49 - 0.6)	-0.0487656	0.235189	0.482366	0.53	(0.46 - 0.6)	-0.0239243	0.639447	0.784819
SL000586	Protein	F2	9.73851	9.99597	9.97167	0.55	(0.5 - 0.6)	0.257466	0.00085519	0.0131388	0.53	(0.46 - 0.6)	0.233165	0.0413233	0.139511	*
SL008822	Protein	ADGRE2	9.80492	9.74531	9.76732	0.55	(0.5 - 0.6)	-0.0596162	0.121587	0.335756	0.53	(0.46 - 0.6)	-0.0375993	0.467887	0.658573
SL004859	Protein	TNFRSF18	9.28432	9.34736	9.29396	0.55	(0.5 - 0.61)	0.0630411	0.342877	0.577154	0.53	(0.47 - 0.6)	0.00964369	0.899921	0.951136			*
AcylCarnitine 13:0	Lipid	AcylCarnitine 13:0	-6.57115	-6.4401	-6.46395	0.54	(0.48 - 0.59)	0.131044	0.188114	0.434905	0.53	(0.47 - 0.6)	0.107198	0.37753	0.58055
Cer(d16:1/20:0)	Lipid	Cer(d16:1/20:0)	-8.91911	-8.99641	-8.97114	0.54	(0.49 - 0.59)	-0.0772931	0.169599	0.414091	0.53	(0.47 - 0.6)	-0.0520278	0.430356	0.630623
Cer(d19:1/22:0)	Lipid	Cer(d19:1/22:0)	-6.30362	-6.39039	-6.32767	0.54	(0.49 - 0.59)	-0.0867729	0.214093	0.460327	0.53	(0.46 - 0.59)	-0.0240505	0.771155	0.878716
SL001802	Protein	IFNG	9.56084	9.64869	9.62969	0.54	(0.48 - 0.59)	0.0878481	0.0123239	0.0819977	0.53	(0.46 - 0.59)	0.0688505	0.130871	0.296476
SL003041	Protein	PF4	15.0288	15.157	15.1292	0.54	(0.48 - 0.59)	0.128207	0.197417	0.441901	0.53	(0.47 - 0.6)	0.100358	0.417645	0.620603
SL004306	Protein	UBE2I	11.2819	11.3628	11.343	0.54	(0.48 - 0.59)	0.0808783	0.176995	0.423024	0.53	(0.46 - 0.6)	0.0611108	0.418658	0.620603
SL010391	Protein	WFIKKN2	12.5795	12.6252	12.6089	0.54	(0.48 - 0.59)	0.0456641	0.248025	0.496638	0.53	(0.46 - 0.59)	0.0294062	0.564605	0.731174
SL008773	Protein	CD109	11.5515	11.607	11.5773	0.54	(0.49 - 0.59)	0.0555061	0.17086	0.414655	0.53	(0.46 - 0.6)	0.0257737	0.618787	0.768369
SL002792	Protein	ADRBK1	12.3144	12.4533	12.4184	0.54	(0.49 - 0.6)	0.138973	0.0786455	0.271801	0.53	(0.46 - 0.6)	0.104061	0.278072	0.485821
SL009628	Protein	ING1	14.0886	14.187	14.1702	0.54	(0.48 - 0.59)	0.098382	0.162138	0.406547	0.53	(0.47 - 0.6)	0.0815931	0.363679	0.566468
SL008808	Protein	SKP1	12.1614	12.1964	12.1913	0.54	(0.48 - 0.59)	0.0350544	0.380962	0.616102	0.53	(0.47 - 0.6)	0.0299543	0.535184	0.706314
SL005372	Protein	SNX4	13.277	13.4074	13.3846	0.54	(0.48 - 0.59)	0.130447	0.100526	0.308488	0.53	(0.47 - 0.6)	0.107644	0.272988	0.481576
SL005588	Protein	FER	9.37937	9.52886	9.49491	0.54	(0.48 - 0.59)	0.149491	0.1407	0.368656	0.53	(0.46 - 0.6)	0.115539	0.347465	0.553455
SL005358	Protein	PEBP1	12.9736	13.0167	13.0002	0.54	(0.48 - 0.59)	0.0430871	0.388017	0.622067	0.53	(0.47 - 0.6)	0.0265872	0.666061	0.805181
SL006998	Protein	PDPK1	8.84384	8.98005	8.91969	0.54	(0.49 - 0.6)	0.136207	0.133432	0.357006	0.53	(0.46 - 0.59)	0.0758493	0.488509	0.674905
SL004739	Protein	ITIH4	15.3231	15.2666	15.2676	0.54	(0.48 - 0.59)	-0.0565706	0.0358941	0.161763	0.53	(0.46 - 0.6)	-0.0555549	0.156796	0.333316
SL004482	Protein	ENG	10.2448	10.3214	10.3099	0.54	(0.48 - 0.59)	0.0766029	0.0617572	0.234539	0.53	(0.46 - 0.6)	0.0651196	0.221919	0.422346
SL002756	Protein	HNRNPK	8.34766	8.27391	8.28875	0.54	(0.49 - 0.6)	-0.073744	0.169442	0.414091	0.53	(0.47 - 0.6)	-0.0589079	0.372865	0.577582
SL005793	Protein	PPIF	11.8218	12.0134	11.952	0.54	(0.49 - 0.6)	0.191603	0.0535437	0.21545	0.53	(0.46 - 0.6)	0.130238	0.274184	0.482513
SL003542	Protein	EHMT2	8.7253	8.69978	8.70091	0.54	(0.49 - 0.59)	-0.025524	0.505915	0.715478	0.53	(0.47 - 0.6)	-0.0243875	0.620092	0.768859
SL005266	Protein	SNCA	13.9471	14.0348	14.0125	0.54	(0.49 - 0.6)	0.0876225	0.0490178	0.199615	0.53	(0.46 - 0.59)	0.065313	0.244178	0.447722
Cer(d16:1/22:0)	Lipid	Cer(d16:1/22:0)	-6.16825	-6.23597	-6.22021	0.53	(0.48 - 0.58)	-0.0677183	0.311922	0.558205	0.53	(0.46 - 0.6)	-0.0519582	0.540499	0.711405
Cer(d16:1/24:0)	Lipid	Cer(d16:1/24:0)	-5.28754	-5.34915	-5.34033	0.53	(0.48 - 0.59)	-0.061612	0.36564	0.60286	0.53	(0.46 - 0.6)	-0.0527926	0.537343	0.707802
Hex2Cer(d18:1/24:1)	Lipid	Hex2Cer(d18:1/24:1)	-7.03324	-7.10172	-7.09558	0.53	(0.48 - 0.58)	-0.0684839	0.205806	0.454063	0.53	(0.46 - 0.59)	-0.0623461	0.394941	0.598074
PC 35:5	Lipid	PC 35:5	-9.39669	-9.50004	-9.5007	0.53	(0.48 - 0.58)	-0.103352	0.195152	0.44037	0.53	(0.47 - 0.6)	-0.104018	0.29895	0.504599
PE(O-40:6)	Lipid	PE(O-40:6)	-4.28889	-4.34566	-4.34687	0.53	(0.47 - 0.58)	-0.0567749	0.350216	0.586295	0.53	(0.46 - 0.59)	-0.0579839	0.425287	0.626076
SM 35:2	Lipid	SM 35:2	-5.88027	-5.9123	-5.91514	0.53	(0.47 - 0.58)	-0.0320351	0.414385	0.644853	0.53	(0.46 - 0.59)	-0.0348725	0.493121	0.676441
SM 41:2	Lipid	SM 41:2	-1.57933	-1.62983	-1.6296	0.53	(0.48 - 0.59)	-0.0505051	0.140134	0.368656	0.53	(0.46 - 0.6)	-0.0502737	0.250388	0.456972
TG 53:2	Lipid	TG 53:2	-1.14038	-1.21546	-1.20967	0.53	(0.48 - 0.58)	-0.0750764	0.408154	0.639871	0.53	(0.46 - 0.6)	-0.0692892	0.512582	0.690066
TG 54:4	Lipid	TG 54:4	0.686111	0.627598	0.605388	0.53	(0.48 - 0.58)	-0.0585133	0.340591	0.5756	0.53	(0.46 - 0.6)	-0.0807225	0.282027	0.489852
SL002565	Protein	MYC	8.92091	8.89161	8.9193	0.53	(0.47 - 0.58)	-0.0293045	0.602877	0.791657	0.53	(0.46 - 0.6)	-0.00161604	0.982832	0.993264
SL004815	Protein	YWHAB	14.4878	14.5771	14.557	0.53	(0.48 - 0.59)	0.0892851	0.216173	0.462993	0.53	(0.46 - 0.59)	0.0692219	0.431049	0.630623
SL000319	Protein	C5	12.8924	12.8677	12.8638	0.53	(0.47 - 0.58)	-0.0247685	0.187619	0.434905	0.53	(0.46 - 0.6)	-0.0286279	0.24426	0.447722
SL000605	Protein	RPS27A	11.7791	11.8323	11.8559	0.53	(0.48 - 0.58)	0.0532678	0.33535	0.575132	0.53	(0.47 - 0.6)	0.0767959	0.289426	0.497084
SL004768	Protein	AIF1	11.5608	11.5437	11.5234	0.53	(0.48 - 0.58)	-0.0171422	0.547066	0.749223	0.53	(0.47 - 0.6)	-0.037436	0.271191	0.480817
SL000136	Protein	AREG	11.5966	11.6545	11.6672	0.53	(0.48 - 0.58)	0.0579677	0.346474	0.582049	0.53	(0.47 - 0.6)	0.0706205	0.352997	0.558921
SL010469	Protein	HFE2	9.92673	9.95326	9.94558	0.53	(0.48 - 0.58)	0.0265315	0.314998	0.560503	0.53	(0.46 - 0.59)	0.0188445	0.568571	0.734157
SL004781	Protein	CSK	13.0296	13.1326	13.1126	0.53	(0.47 - 0.58)	0.103067	0.276328	0.523537	0.53	(0.46 - 0.59)	0.0830325	0.474836	0.665953
SL003703	Protein	BCL2A1	9.93593	9.97491	9.94855	0.53	(0.48 - 0.59)	0.0389795	0.117623	0.327484	0.53	(0.46 - 0.59)	0.0126186	0.551824	0.722932
SL003785	Protein	GAPDH	15.8642	15.9043	15.9542	0.53	(0.47 - 0.58)	0.0401007	0.7125	0.857639	0.53	(0.46 - 0.59)	0.0900644	0.482992	0.670542
SL004511	Protein	BPI	10.2138	10.2758	10.2807	0.53	(0.47 - 0.58)	0.0620021	0.431085	0.662906	0.53	(0.46 - 0.6)	0.0668929	0.491959	0.676441
SL007003	Protein	DHH	9.5873	9.63925	9.65404	0.53	(0.47 - 0.58)	0.0519457	0.287255	0.537015	0.53	(0.46 - 0.6)	0.0667399	0.294533	0.501022
SL004334	Protein	FGF16	11.2428	11.2997	11.3123	0.53	(0.47 - 0.58)	0.0569715	0.343991	0.578453	0.53	(0.47 - 0.6)	0.0694908	0.348476	0.554542
SL003674	Protein	BCL2L1	10.4888	10.5673	10.5525	0.53	(0.48 - 0.59)	0.0785358	0.104723	0.313632	0.53	(0.47 - 0.6)	0.0637493	0.278914	0.486444
SL001753	Protein	SIGLEC1	7.00178	6.90014	6.89614	0.53	(0.48 - 0.59)	-0.101645	0.0342301	0.157198	0.53	(0.46 - 0.59)	-0.105646	0.0356836	0.127226
SL005187	Protein	IL3RA	10.2858	10.3456	10.3432	0.53	(0.48 - 0.59)	0.0597989	0.252281	0.500416	0.53	(0.47 - 0.6)	0.0574052	0.362373	0.565476
SL004080	Protein	BMPR1A	9.46785	9.45795	9.45614	0.53	(0.48 - 0.59)	-0.00989974	0.798496	0.903982	0.53	(0.46 - 0.6)	-0.0117106	0.814905	0.904809
SL011708	Protein	ARPP19	11.4932	11.5808	11.5731	0.53	(0.48 - 0.58)	0.0876571	0.234073	0.482366	0.53	(0.46 - 0.6)	0.0799028	0.387001	0.589749
SL003440	Protein	PLA2G7	9.63356	9.59888	9.59462	0.53	(0.48 - 0.58)	-0.0346746	0.338001	0.575277	0.53	(0.46 - 0.6)	-0.0389368	0.343086	0.548548
SL009202	Protein	AMICA1	8.90819	8.89603	8.87879	0.53	(0.48 - 0.58)	-0.0121566	0.800111	0.903982	0.53	(0.46 - 0.6)	-0.0293973	0.596546	0.756029
SL016550	Protein	CSNK2A1 CSNK2B	13.1223	13.1896	13.21	0.53	(0.47 - 0.58)	0.0672861	0.293309	0.543601	0.53	(0.47 - 0.6)	0.0876617	0.266202	0.476065
SL007145	Protein	NR1D1	9.07814	9.06934	9.0502	0.53	(0.47 - 0.58)	-0.0088042	0.852186	0.928988	0.53	(0.46 - 0.6)	-0.0279387	0.593824	0.753426
SL016567	Protein	MAP3K7 TAB1	10.2762	10.2167	10.1938	0.53	(0.47 - 0.58)	-0.0595284	0.188116	0.434905	0.53	(0.46 - 0.6)	-0.0824028	0.116398	0.273973
SL016130	Protein	BRF1	11.0042	10.9068	10.8839	0.53	(0.48 - 0.59)	-0.0973919	0.0390093	0.169801	0.53	(0.47 - 0.6)	-0.120291	0.0134109	0.0614179
SL007471	Protein	COLEC12	11.2835	11.2558	11.2281	0.53	(0.47 - 0.58)	-0.0276692	0.538598	0.743046	0.53	(0.47 - 0.6)	-0.0553233	0.308906	0.516883
PWT	Echo Imaging	PWT	11.0393	11.37	11.3138	0.52	(0.47 - 0.57)	0.330739	0.140489	0.368656	0.53	(0.46 - 0.6)	0.274463	0.294994	0.501022
LPC 17:0	Lipid	LPC 17:0	-3.85483	-3.90769	-3.94651	0.52	(0.47 - 0.58)	-0.0528587	0.257304	0.505384	0.53	(0.46 - 0.6)	-0.0916732	0.143957	0.315139
LPC(O-22:0)	Lipid	LPC(O-22:0)	-8.76747	-8.7403	-8.73477	0.52	(0.47 - 0.57)	0.0271733	0.451966	0.678953	0.53	(0.46 - 0.6)	0.0327002	0.503406	0.685361
PC 34:1	Lipid	PC 34:1	0.490408	0.500919	0.501973	0.52	(0.46 - 0.57)	0.0105103	0.390321	0.62407	0.53	(0.46 - 0.59)	0.011565	0.444425	0.639216
PC 36:4	Lipid	PC 36:4	0.446247	0.439402	0.433439	0.52	(0.47 - 0.58)	-0.00684501	0.474851	0.694435	0.53	(0.47 - 0.6)	-0.0128078	0.292799	0.499786
TG 48:1	Lipid	TG 48:1	-1.17572	-1.08559	-0.988687	0.52	(0.46 - 0.57)	0.0901282	0.453571	0.680156	0.53	(0.47 - 0.6)	0.187029	0.220542	0.42227
SL008402	Protein	LYPD3	9.95367	9.91168	9.90992	0.52	(0.47 - 0.58)	-0.0419865	0.258626	0.505384	0.53	(0.46 - 0.59)	-0.0437445	0.311963	0.517896
SL000009	Protein	ERBB2	8.86057	8.82592	8.8245	0.52	(0.47 - 0.57)	-0.0346453	0.555643	0.757197	0.53	(0.46 - 0.6)	-0.0360649	0.600385	0.757494
SL000581	Protein	SOD1	10.3067	10.3202	10.3428	0.52	(0.46 - 0.57)	0.0134749	0.715785	0.858535	0.53	(0.46 - 0.6)	0.0361145	0.459569	0.651023
SL000409	Protein	MAPK3	14.581	14.6387	14.6449	0.52	(0.47 - 0.58)	0.057688	0.373125	0.609214	0.53	(0.46 - 0.59)	0.0639134	0.424081	0.625685
SL004872	Protein	EDAR	9.87691	9.93416	9.927	0.52	(0.47 - 0.58)	0.0572489	0.428422	0.660748	0.53	(0.46 - 0.59)	0.0500939	0.561852	0.730408
SL004850	Protein	IL17RA	9.49813	9.46094	9.44224	0.52	(0.47 - 0.58)	-0.0371897	0.443936	0.672268	0.53	(0.46 - 0.6)	-0.0558898	0.375099	0.579449
SL004862	Protein	PDCD1LG2	11.7515	11.7671	11.7689	0.52	(0.47 - 0.58)	0.0155594	0.602266	0.791476	0.53	(0.46 - 0.59)	0.0173848	0.627019	0.773476
SL000004	Protein	FGF2	11.368	11.4231	11.4861	0.52	(0.47 - 0.58)	0.0551532	0.647997	0.82346	0.53	(0.47 - 0.6)	0.11816	0.433659	0.630708
SL003305	Protein	IL2RA	10.0616	10.067	10.068	0.52	(0.47 - 0.57)	0.00541247	0.936263	0.974958	0.53	(0.46 - 0.59)	0.00642587	0.939926	0.975722
SL010393	Protein	KREMEN2	11.6494	11.665	11.6868	0.52	(0.46 - 0.57)	0.0156198	0.727566	0.864688	0.53	(0.46 - 0.6)	0.0374372	0.497747	0.680466
SL004610	Protein	LRP8	10.8422	10.843	10.843	0.52	(0.47 - 0.58)	0.000809209	0.982301	0.993609	0.53	(0.47 - 0.6)	0.000755273	0.985432	0.993289
SL004654	Protein	GZMH	7.90056	7.94796	7.93074	0.52	(0.47 - 0.58)	0.0473979	0.181684	0.429239	0.53	(0.47 - 0.6)	0.0301784	0.572895	0.737929
SL003862	Protein	CD40LG	8.62161	8.6528	8.64312	0.52	(0.47 - 0.58)	0.0311875	0.563817	0.765342	0.53	(0.46 - 0.59)	0.0215079	0.752195	0.870692
SL009629	Protein	MBD4	9.06046	9.03638	9.03818	0.52	(0.47 - 0.58)	-0.0240765	0.529827	0.733189	0.53	(0.46 - 0.59)	-0.0222743	0.68556	0.818796
SL003680	Protein	AGER	9.18016	9.14513	9.27152	0.52	(0.46 - 0.57)	-0.0350221	0.650835	0.825759	0.53	(0.47 - 0.6)	0.0913646	0.334227	0.538973				*
SL002922	Protein	ICAM1	12.0651	12.0217	12.0206	0.52	(0.47 - 0.58)	-0.043479	0.470661	0.692061	0.53	(0.46 - 0.6)	-0.0444988	0.544387	0.715203
SL008945	Protein	TGM3	9.06337	9.18107	9.25478	0.52	(0.47 - 0.58)	0.117706	0.436973	0.667105	0.53	(0.47 - 0.6)	0.191409	0.327086	0.533393
SL001726	Protein	CSF2	8.09911	7.99284	7.99226	0.52	(0.46 - 0.57)	-0.106268	0.0730019	0.262496	0.53	(0.47 - 0.6)	-0.106845	0.088032	0.229944
SL003657	Protein	PPP3CA PPP3R1	10.0942	10.0368	10.0283	0.52	(0.47 - 0.58)	-0.0574004	0.377861	0.612258	0.53	(0.46 - 0.6)	-0.0659179	0.423738	0.625685
SL000523	Protein	MMP13	9.32824	9.31153	9.3471	0.52	(0.47 - 0.57)	-0.0167157	0.744312	0.878413	0.53	(0.46 - 0.6)	0.0188547	0.77102	0.878716
SL004737	Protein	TPM1	10.0197	10.0059	10.0338	0.52	(0.47 - 0.58)	-0.0137837	0.746093	0.879287	0.53	(0.47 - 0.6)	0.0141324	0.818109	0.905208
SL003647	Protein	ANXA6	12.7306	12.7828	12.7884	0.52	(0.47 - 0.57)	0.0522811	0.507656	0.716741	0.53	(0.46 - 0.59)	0.0578439	0.561055	0.730319
SL004131	Protein	CD86	9.79243	9.79231	9.80897	0.52	(0.47 - 0.57)	-0.000126093	0.997306	0.998488	0.53	(0.46 - 0.6)	0.0165316	0.764208	0.875889
SL014113	Protein	NLGN4X	9.53894	9.52428	9.63906	0.52	(0.47 - 0.57)	-0.0146613	0.748812	0.880649	0.53	(0.47 - 0.6)	0.100116	0.151308	0.326627
SL004714	Protein	LIFR	12.0755	12.0548	12.0397	0.52	(0.46 - 0.57)	-0.0207001	0.467555	0.689793	0.53	(0.46 - 0.6)	-0.035838	0.292368	0.499597
SL008176	Protein	PSME1	10.8498	10.8693	10.876	0.52	(0.47 - 0.57)	0.019467	0.647761	0.82346	0.53	(0.46 - 0.6)	0.0261772	0.613413	0.764505
SL012774	Protein	CRELD1	11.6414	11.6263	11.6873	0.52	(0.47 - 0.57)	-0.0150899	0.656317	0.826483	0.53	(0.46 - 0.6)	0.0458796	0.312763	0.518715				*
CE 16:1	Lipid	CE 16:1	-3.75766	-3.73207	-3.6577	0.51	(0.45 - 0.56)	0.0255904	0.725362	0.863099	0.53	(0.46 - 0.59)	0.0999652	0.294745	0.501022
CE 17:1	Lipid	CE 17:1	-6.01926	-5.98082	-5.93919	0.51	(0.46 - 0.56)	0.0384355	0.553537	0.755636	0.53	(0.46 - 0.59)	0.0800727	0.334044	0.538973
CE 18:1	Lipid	CE 18:1	0.942859	0.962038	0.978691	0.51	(0.46 - 0.57)	0.0191793	0.656792	0.826483	0.53	(0.46 - 0.6)	0.0358319	0.514825	0.691617
CE 22:4	Lipid	CE 22:4	-6.18145	-6.21597	-6.2549	0.51	(0.46 - 0.57)	-0.0345226	0.61189	0.795457	0.53	(0.47 - 0.6)	-0.0734517	0.398693	0.603215
CE 22:5	Lipid	CE 22:5	-4.37444	-4.39617	-4.44189	0.51	(0.45 - 0.56)	-0.0217292	0.715296	0.858535	0.53	(0.46 - 0.59)	-0.0674534	0.381769	0.583882
Cer(m18:1/24:0)	Lipid	Cer(m18:1/24:0)	-5.97038	-5.91046	-5.84274	0.51	(0.46 - 0.57)	0.0599159	0.442719	0.672002	0.53	(0.46 - 0.6)	0.127641	0.210807	0.41047
LPC 24:0	Lipid	LPC 24:0	-9.62804	-9.64988	-9.69025	0.51	(0.46 - 0.57)	-0.0218374	0.568382	0.768452	0.53	(0.46 - 0.6)	-0.0622132	0.196048	0.386605
LPS 18:2	Lipid	LPS 18:2	-8.09202	-8.07826	-8.17429	0.51	(0.45 - 0.56)	0.0137688	0.831239	0.916757	0.53	(0.46 - 0.6)	-0.0822705	0.309881	0.517049
PE(P-18:1/18:1)	Lipid	PE(P-18:1/18:1)	-4.73459	-4.7228	-4.67643	0.51	(0.46 - 0.57)	0.0117885	0.835285	0.918237	0.53	(0.46 - 0.59)	0.0581628	0.383242	0.585076
PE(P-18:1/20:5)	Lipid	PE(P-18:1/20:5)	-4.47587	-4.50599	-4.55252	0.51	(0.46 - 0.57)	-0.0301145	0.723649	0.862831	0.53	(0.46 - 0.6)	-0.0766521	0.447564	0.64046
SM 32:1	Lipid	SM 32:1	-0.837508	-0.808426	-0.766405	0.51	(0.46 - 0.57)	0.029082	0.515495	0.723577	0.53	(0.47 - 0.6)	0.0711029	0.213347	0.413008
SM 34:1	Lipid	SM 34:1	2.91065	2.91976	2.9256	0.51	(0.46 - 0.56)	0.00911313	0.653909	0.826483	0.53	(0.46 - 0.59)	0.0149567	0.561352	0.730319
TG 52:1	Lipid	TG 52:1	0.55303	0.589362	0.663644	0.51	(0.46 - 0.56)	0.0363324	0.701389	0.852345	0.53	(0.46 - 0.6)	0.110614	0.325977	0.532272
TG(O-50:1)	Lipid	TG(O-50:1)	-4.20403	-4.16084	-4.04519	0.51	(0.45 - 0.56)	0.0431805	0.68327	0.838581	0.53	(0.46 - 0.6)	0.158834	0.221154	0.422316
SL007070	Protein	LDLR	7.51166	7.47359	7.41727	0.51	(0.46 - 0.56)	-0.03807	0.497016	0.708227	0.53	(0.47 - 0.6)	-0.0943972	0.133012	0.299322
SL003193	Protein	CCL21	15.04	14.9938	14.9693	0.51	(0.45 - 0.56)	-0.0462517	0.304366	0.553095	0.53	(0.46 - 0.59)	-0.0707083	0.190077	0.380302
SL005159	Protein	EPOR	8.5126	8.49946	8.48614	0.51	(0.46 - 0.57)	-0.01314	0.602057	0.791476	0.53	(0.47 - 0.6)	-0.0264619	0.418882	0.620603
SL000248	Protein	SERPINA3	18.0651	18.0699	18.0599	0.51	(0.46 - 0.57)	0.00481479	0.789163	0.901139	0.53	(0.46 - 0.59)	-0.00523467	0.813085	0.904809
SL004362	Protein	CLEC11A	10.1053	10.1172	10.1358	0.51	(0.46 - 0.56)	0.0118896	0.737684	0.8712	0.53	(0.46 - 0.59)	0.03053	0.492353	0.676441
SL003173	Protein	CXCL1	12.0148	12.0856	12.1188	0.51	(0.46 - 0.57)	0.0708434	0.259271	0.505384	0.53	(0.46 - 0.6)	0.104031	0.190376	0.380302
SL000428	Protein	CGA FSHB	10.6476	10.6464	10.788	0.51	(0.45 - 0.56)	-0.00124137	0.993319	0.995676	0.53	(0.46 - 0.59)	0.140441	0.440938	0.638137
SL004367	Protein	DKK1	14.5534	14.5424	14.5108	0.51	(0.46 - 0.57)	-0.0110191	0.83405	0.918237	0.53	(0.46 - 0.6)	-0.0426433	0.52768	0.699435
SL010376	Protein	MMEL1	10.1143	10.0946	10.0769	0.51	(0.46 - 0.57)	-0.0196803	0.613831	0.797367	0.53	(0.46 - 0.6)	-0.0374229	0.409849	0.61315
SL000617	Protein	GPT	12.3729	12.3863	12.3406	0.51	(0.45 - 0.56)	0.0134181	0.683084	0.838581	0.53	(0.47 - 0.6)	-0.0323012	0.41175	0.614715
SL011616	Protein	EIF4A3	9.20979	9.26708	9.21211	0.51	(0.46 - 0.57)	0.05729	0.243122	0.492168	0.53	(0.46 - 0.59)	0.002318	0.970658	0.98661
SL010470	Protein	SEMA3E	11.3355	11.3403	11.3622	0.51	(0.45 - 0.56)	0.00478632	0.941767	0.977633	0.53	(0.46 - 0.6)	0.0266574	0.737242	0.86105
SL011510	Protein	SST	10.4586	10.4556	10.4613	0.51	(0.46 - 0.57)	-0.00300048	0.8898	0.950544	0.53	(0.46 - 0.59)	0.00270964	0.924831	0.965882
Cer(d16:1/24:1)	Lipid	Cer(d16:1/24:1)	-6.39104	-6.37325	-6.31581	0.5	(0.45 - 0.56)	0.0177875	0.781623	0.897414	0.53	(0.46 - 0.59)	0.0752245	0.330956	0.537286
LPC 18:1	Lipid	LPC 18:1	0.190141	0.172972	0.127783	0.5	(0.45 - 0.56)	-0.0171691	0.714746	0.858535	0.53	(0.46 - 0.6)	-0.0623584	0.310787	0.517467
PC 36:3	Lipid	PC 36:3	0.421181	0.422054	0.456014	0.5	(0.45 - 0.56)	0.000872847	0.980448	0.993609	0.53	(0.46 - 0.6)	0.0348325	0.432481	0.630623
SL000467	Protein	IGHG1 IGHG2 IGHG3 IGHG4 IGK@ IGL@	17.6269	17.6217	17.5979	0.5	(0.44 - 0.55)	-0.00514328	0.825766	0.915314	0.53	(0.46 - 0.59)	-0.028998	0.329552	0.536037
SL005797	Protein	PIGR	12.0847	12.0726	11.9999	0.5	(0.44 - 0.55)	-0.0121085	0.83565	0.918237	0.53	(0.46 - 0.6)	-0.0848391	0.234869	0.437145
SL007747	Protein	TBK1	8.14994	8.14935	8.10305	0.5	(0.45 - 0.56)	-0.000587897	0.985771	0.995193	0.53	(0.47 - 0.6)	-0.0468946	0.237108	0.439377
SL000674	Protein	FST	9.9055	9.90289	9.93375	0.5	(0.45 - 0.56)	-0.00260571	0.92037	0.966103	0.53	(0.46 - 0.59)	0.0282565	0.400193	0.604307
SL001973	Protein	SCGB2A1	13.2587	13.2586	13.2288	0.5	(0.45 - 0.56)	-0.000139811	0.994863	0.996632	0.53	(0.46 - 0.6)	-0.0299123	0.28893	0.496791
SL004296	Protein	AK1	15.0297	15.011	14.9634	0.5	(0.45 - 0.55)	-0.0187065	0.704033	0.854139	0.53	(0.46 - 0.59)	-0.066376	0.293956	0.500791
SL009792	Protein	ADSL	13.7686	13.7644	13.7149	0.5	(0.45 - 0.56)	-0.00423668	0.943201	0.978521	0.53	(0.47 - 0.6)	-0.0536858	0.509051	0.687966
SL014188	Protein	CD244	7.45793	7.50024	7.44316	0.5	(0.45 - 0.55)	0.0423097	0.293005	0.543601	0.53	(0.46 - 0.6)	-0.0147745	0.768233	0.877832
SL005210	Protein	NRCAM	13.737	13.746	13.7724	0.5	(0.45 - 0.56)	0.00902959	0.82598	0.915314	0.53	(0.46 - 0.59)	0.0354001	0.476667	0.666861
LPC(P-17:0)	Lipid	LPC(P-17:0)	-10.2139	-10.2301	-10.2858	0.49	(0.44 - 0.55)	-0.0162565	0.745007	0.87862	0.53	(0.46 - 0.6)	-0.0719592	0.267142	0.477242
PE(P-18:0/20:4)	Lipid	PE(P-18:0/20:4)	-0.583526	-0.630807	-0.667112	0.49	(0.44 - 0.55)	-0.0472814	0.439025	0.668426	0.53	(0.47 - 0.6)	-0.0835867	0.262385	0.469736
TG 48:2	Lipid	TG 48:2	-0.578181	-0.508743	-0.431611	0.49	(0.43 - 0.54)	0.0694376	0.565221	0.765403	0.53	(0.46 - 0.6)	0.14657	0.330916	0.537286
Ubiquinone	Lipid	Ubiquinone	-6.39473	-6.44538	-6.51252	0.49	(0.43 - 0.54)	-0.0506511	0.509919	0.718735	0.53	(0.46 - 0.6)	-0.117792	0.223869	0.424622
SL000137	Protein	BTC	9.20488	9.17995	9.17089	0.49	(0.44 - 0.55)	-0.0249365	0.530586	0.733189	0.53	(0.47 - 0.6)	-0.0339932	0.524293	0.696038
SL003043	Protein	TIMP3	10.5315	10.5635	10.5867	0.49	(0.43 - 0.54)	0.0319302	0.626245	0.806672	0.53	(0.47 - 0.6)	0.0551761	0.479675	0.66996
SL001945	Protein	SELE	14.6942	14.6512	14.6271	0.49	(0.43 - 0.54)	-0.0430286	0.347757	0.58333	0.53	(0.46 - 0.6)	-0.0671255	0.234189	0.437145
SL000638	Protein	CDH2	10.9134	10.8714	10.9204	0.49	(0.43 - 0.54)	-0.041936	0.366178	0.603078	0.53	(0.46 - 0.6)	0.00706994	0.902071	0.952218
SL004133	Protein	BMPR2	8.97127	8.97345	9.04708	0.49	(0.44 - 0.55)	0.00217923	0.968248	0.989581	0.53	(0.46 - 0.6)	0.0758119	0.287016	0.495504
SL007181	Protein	TYK2	11.7041	11.7092	11.6393	0.49	(0.44 - 0.55)	0.00512799	0.911342	0.96023	0.53	(0.46 - 0.6)	-0.0647741	0.278269	0.485821
PC 34:0	Lipid	PC 34:0	-5.88613	-5.86127	-5.83887	0.48	(0.43 - 0.54)	0.0248582	0.528554	0.733189	0.53	(0.46 - 0.6)	0.0472591	0.342483	0.548548
PC 36:6	Lipid	PC 36:6	-7.42399	-7.49421	-7.53168	0.48	(0.43 - 0.54)	-0.070212	0.314593	0.560503	0.53	(0.46 - 0.6)	-0.107683	0.227691	0.429942
SL010512	Protein	PIK3CA PIK3R1	9.03359	9.04204	9.04162	0.48	(0.43 - 0.53)	0.00844571	0.890482	0.950673	0.53	(0.46 - 0.6)	0.00802712	0.910309	0.957922
SL014111	Protein	KIRREL3	8.18213	8.16615	8.1635	0.48	(0.43 - 0.53)	-0.0159764	0.326939	0.569028	0.53	(0.46 - 0.6)	-0.0186254	0.363534	0.566468
SL010503	Protein	MAPKAPK2	12.3092	12.3932	12.3954	0.47	(0.42 - 0.53)	0.083937	0.272897	0.520043	0.53	(0.47 - 0.6)	0.0861589	0.350839	0.55673
Hex1Cer(d18:2/24:0)	Lipid	Hex1Cer(d18:2/24:0)	-5.98794	-6.07162	-5.99979	0.55	(0.5 - 0.6)	-0.0836836	0.1005	0.308488	0.52	(0.45 - 0.59)	-0.0118476	0.852166	0.926149
SL004869	Protein	CA13	10.751	10.95	10.8486	0.55	(0.5 - 0.61)	0.199005	0.0604046	0.231301	0.52	(0.46 - 0.59)	0.0975787	0.466568	0.65818
SL011406	Protein	PDE7A	8.72545	8.72472	8.77286	0.55	(0.49 - 0.6)	-0.000730179	0.982438	0.993609	0.52	(0.45 - 0.59)	0.0474051	0.439365	0.637012
SL016549	Protein	PRKAA2 PRKAB2 PRKAG1	11.1352	11.2047	11.1398	0.55	(0.49 - 0.6)	0.0694565	0.323121	0.56471	0.52	(0.46 - 0.59)	0.00459127	0.956112	0.982236
SL012881	Protein	GPC6	11.2464	11.327	11.2862	0.55	(0.5 - 0.61)	0.0805804	0.0180821	0.104517	0.52	(0.45 - 0.59)	0.0397805	0.311587	0.51778
PE(O-38:4)	Lipid	PE(O-38:4)	-3.88048	-3.96999	-3.94635	0.54	(0.48 - 0.59)	-0.0895094	0.221547	0.468604	0.52	(0.46 - 0.59)	-0.0658714	0.424652	0.625685
SL000318	Protein	C4A C4B	8.79948	8.91948	8.88564	0.54	(0.48 - 0.59)	0.120003	0.11141	0.319664	0.52	(0.45 - 0.59)	0.0861559	0.364137	0.566658
SL002561	Protein	PTHLH	9.73564	9.71673	9.73204	0.54	(0.48 - 0.59)	-0.0189141	0.657763	0.826483	0.52	(0.45 - 0.59)	-0.00360223	0.946966	0.978524
SL007049	Protein	CST7	9.70511	9.752	9.74195	0.54	(0.49 - 0.59)	0.0468882	0.49257	0.705461	0.52	(0.45 - 0.59)	0.0368363	0.674431	0.810499
SL003726	Protein	CHEK2	8.14379	8.08535	8.13435	0.54	(0.49 - 0.59)	-0.0584373	0.622271	0.80397	0.52	(0.45 - 0.59)	-0.00943626	0.94778	0.978524
SL010349	Protein	FN1	11.2197	11.3025	11.2755	0.54	(0.49 - 0.6)	0.0827876	0.0486516	0.199083	0.52	(0.45 - 0.59)	0.0558558	0.288733	0.496791
SL005392	Protein	ARSA	10.1701	10.1715	10.1306	0.54	(0.48 - 0.59)	0.00141645	0.978183	0.993609	0.52	(0.45 - 0.59)	-0.0394745	0.45759	0.650034
SL010530	Protein	OCIAD1	9.87369	9.87779	9.84971	0.54	(0.49 - 0.6)	0.00410418	0.888254	0.950335	0.52	(0.45 - 0.59)	-0.0239726	0.433468	0.630708
SL005675	Protein	ATP5B	11.0132	10.9377	10.9756	0.54	(0.48 - 0.59)	-0.0755172	0.109006	0.317198	0.52	(0.45 - 0.59)	-0.0376197	0.505585	0.686296
SL004914	Protein	PPA1	14.6872	14.7733	14.7471	0.54	(0.49 - 0.6)	0.0861131	0.0908931	0.294633	0.52	(0.46 - 0.59)	0.0598783	0.360734	0.565006
SL003739	Protein	TNFRSF6B	9.63176	9.55656	9.59501	0.54	(0.49 - 0.6)	-0.0752011	0.0829709	0.283274	0.52	(0.45 - 0.59)	-0.0367512	0.481282	0.669988
SL011400	Protein	PDE1A	9.76086	9.82577	9.75764	0.54	(0.48 - 0.59)	0.0649115	0.278867	0.524816	0.52	(0.46 - 0.59)	-0.00321358	0.959185	0.983034
SL002086	Protein	FCN3	9.84049	9.68142	9.77728	0.54	(0.49 - 0.6)	-0.159069	0.198388	0.442315	0.52	(0.45 - 0.58)	-0.0632093	0.693439	0.825917
Cer(d18:1/19:0)	Lipid	Cer(d18:1/19:0)	-5.97918	-6.00526	-5.98512	0.53	(0.48 - 0.58)	-0.026087	0.300035	0.548824	0.52	(0.45 - 0.59)	-0.00594595	0.859521	0.92936
Cer(d18:2/24:1)	Lipid	Cer(d18:2/24:1)	-4.89466	-4.94124	-4.91485	0.53	(0.47 - 0.58)	-0.0465773	0.427888	0.660748	0.52	(0.45 - 0.58)	-0.0201864	0.788001	0.892098
Cer(m18:2/24:0)	Lipid	Cer(m18:2/24:0)	-1.53484	-1.59747	-1.55671	0.53	(0.48 - 0.59)	-0.0626257	0.230912	0.478824	0.52	(0.45 - 0.59)	-0.0218656	0.738991	0.862497
PE(O-34:1)	Lipid	PE(O-34:1)	-5.95742	-6.02662	-6.00498	0.53	(0.48 - 0.59)	-0.0692018	0.234614	0.482366	0.52	(0.46 - 0.59)	-0.0475553	0.51021	0.688701
SL000448	Protein	HSPB1	12.8882	12.9984	12.9649	0.53	(0.47 - 0.58)	0.110157	0.183831	0.430296	0.52	(0.45 - 0.59)	0.0766991	0.455154	0.648199
SL004644	Protein	EDA	10.6632	10.6526	10.6909	0.53	(0.48 - 0.59)	-0.0105109	0.785588	0.897664	0.52	(0.46 - 0.59)	0.0277302	0.611174	0.762276
SL000398	Protein	CYP3A4	14.1513	14.2122	14.1855	0.53	(0.48 - 0.59)	0.0609296	0.229948	0.477719	0.52	(0.46 - 0.59)	0.034254	0.58667	0.750354
SL017610	Protein	CXCL3 CXCL2	9.80391	9.88006	9.83449	0.53	(0.48 - 0.59)	0.076153	0.283859	0.532433	0.52	(0.45 - 0.59)	0.0305812	0.72112	0.847629
SL005196	Protein	LSAMP	10.6362	10.6007	10.6133	0.53	(0.48 - 0.58)	-0.0354395	0.170262	0.414091	0.52	(0.45 - 0.59)	-0.0229143	0.485654	0.673278
SL004125	Protein	INSR	13.0136	12.987	13.0032	0.53	(0.47 - 0.58)	-0.0266173	0.507462	0.716741	0.52	(0.45 - 0.59)	-0.0103503	0.82972	0.911721
SL010515	Protein	RPS6KA3	8.84788	8.90399	8.86962	0.53	(0.48 - 0.58)	0.0561116	0.409764	0.641645	0.52	(0.45 - 0.58)	0.0217446	0.795447	0.895937
SL006830	Protein	CFHR5	10.3045	10.276	10.2854	0.53	(0.48 - 0.58)	-0.0284915	0.412077	0.643038	0.52	(0.45 - 0.59)	-0.0190405	0.668907	0.806505
SL000570	Protein	SCT	7.71462	7.71252	7.72399	0.53	(0.48 - 0.58)	-0.00210862	0.957345	0.987028	0.52	(0.45 - 0.58)	0.00936419	0.849536	0.923884
SL008063	Protein	ACP1	11.8672	11.9837	11.9611	0.53	(0.48 - 0.58)	0.116516	0.244568	0.493222	0.52	(0.46 - 0.59)	0.0939255	0.443468	0.63864
SL008143	Protein	UBE2N	12.7658	12.8298	12.8008	0.53	(0.48 - 0.58)	0.0640522	0.327962	0.570223	0.52	(0.45 - 0.58)	0.0349929	0.672893	0.809387
SL011769	Protein	ANP32B	7.67923	7.70023	7.70405	0.53	(0.48 - 0.58)	0.0210002	0.407318	0.639871	0.52	(0.45 - 0.59)	0.0248177	0.498069	0.680466
SL017189	Protein	KNG1	14.6963	14.6788	14.6946	0.53	(0.47 - 0.58)	-0.0175559	0.606929	0.793497	0.52	(0.45 - 0.59)	-0.0017752	0.968082	0.985774
SL000535	Protein	PDGFA	13.5532	13.6373	13.581	0.53	(0.48 - 0.59)	0.0841544	0.256872	0.505384	0.52	(0.46 - 0.59)	0.0278331	0.771979	0.878716
SL013969	Protein	KYNU	9.89335	9.91171	9.88515	0.53	(0.47 - 0.58)	0.0183617	0.678805	0.837358	0.52	(0.45 - 0.59)	-0.00820262	0.884498	0.943472
SL000454	Protein	HSP90AB1	15.5348	15.5762	15.5672	0.53	(0.47 - 0.58)	0.041414	0.351975	0.587785	0.52	(0.46 - 0.59)	0.0324154	0.553282	0.724281
averageE.averageA	Echo Imaging	E'/A'	0.914556	0.909681	0.921756	0.52	(0.47 - 0.58)	-0.00487535	0.888478	0.950335	0.52	(0.45 - 0.59)	0.00719956	0.880095	0.942561
Hex2Cer(d18:1/16:0)	Lipid	Hex2Cer(d18:1/16:0)	-4.12557	-4.14189	-4.16011	0.52	(0.46 - 0.57)	-0.0163185	0.648048	0.82346	0.52	(0.45 - 0.59)	-0.0345428	0.491419	0.676302
LPC 19:1	Lipid	LPC 19:1	-9.01022	-9.03163	-9.04513	0.52	(0.46 - 0.57)	-0.021418	0.609328	0.794726	0.52	(0.45 - 0.59)	-0.0349096	0.521456	0.695
LPC(O-18:1)	Lipid	LPC(O-18:1)	-5.71889	-5.7403	-5.75158	0.52	(0.46 - 0.57)	-0.0214069	0.561456	0.763363	0.52	(0.45 - 0.59)	-0.0326837	0.519537	0.694634
LPE 16:0	Lipid	LPE 16:0	-2.22461	-2.20084	-2.19629	0.52	(0.46 - 0.57)	0.0237711	0.623223	0.80397	0.52	(0.45 - 0.59)	0.0283156	0.656724	0.797889
PC 34:4	Lipid	PC 34:4	-6.6401	-6.70885	-6.71883	0.52	(0.47 - 0.57)	-0.0687469	0.322174	0.56415	0.52	(0.45 - 0.59)	-0.0787265	0.394675	0.598074
TG 50:4	Lipid	TG 50:4	-1.49656	-1.57551	-1.57292	0.52	(0.46 - 0.57)	-0.0789443	0.529417	0.733189	0.52	(0.45 - 0.58)	-0.0763532	0.626288	0.773476
SL004097	Protein	SMAD3	13.48	13.5209	13.5179	0.52	(0.47 - 0.57)	0.0409467	0.434042	0.665033	0.52	(0.45 - 0.59)	0.0378693	0.564305	0.731174
SL001716	Protein	IL12A IL12B	8.29575	8.29213	8.26698	0.52	(0.47 - 0.58)	-0.00362654	0.945224	0.978817	0.52	(0.45 - 0.59)	-0.0287748	0.65453	0.796369
SL019978	Protein	IFNA7	8.27121	8.22551	8.24583	0.52	(0.47 - 0.57)	-0.0456991	0.472963	0.693572	0.52	(0.46 - 0.59)	-0.0253785	0.747554	0.868293
SL000527	Protein	MMP9	14.3729	14.4093	14.4119	0.52	(0.47 - 0.58)	0.0364218	0.52136	0.728543	0.52	(0.46 - 0.59)	0.039025	0.592613	0.752815
SL003738	Protein	CD80	9.68791	9.77661	9.75877	0.52	(0.47 - 0.58)	0.0887009	0.162562	0.406603	0.52	(0.45 - 0.59)	0.0708621	0.365592	0.567878
SL003872	Protein	IL6ST	12.8076	12.788	12.7875	0.52	(0.47 - 0.58)	-0.0196236	0.401326	0.635058	0.52	(0.46 - 0.59)	-0.0201101	0.468015	0.658573
SL000474	Protein	IL16	8.38931	8.36466	8.36639	0.52	(0.47 - 0.58)	-0.0246485	0.336754	0.575132	0.52	(0.45 - 0.59)	-0.0229184	0.473943	0.665468
SL000006	Protein	SERPINE1	10.154	10.1654	10.1683	0.52	(0.46 - 0.57)	0.01138	0.877525	0.946405	0.52	(0.45 - 0.59)	0.0142428	0.875446	0.938772
SL004855	Protein	CNTN1	8.14027	8.16856	8.18929	0.52	(0.47 - 0.57)	0.0282863	0.417721	0.648804	0.52	(0.45 - 0.59)	0.0490178	0.320724	0.52726
SL000164	Protein	MB	10.5467	10.5615	10.5807	0.52	(0.47 - 0.57)	0.0147594	0.764918	0.889072	0.52	(0.46 - 0.59)	0.0340217	0.607517	0.761792
SL000603	Protein	PRSS1	13.1502	13.1888	13.1739	0.52	(0.47 - 0.57)	0.0385219	0.454728	0.680682	0.52	(0.45 - 0.59)	0.0236524	0.749551	0.869417
SL007385	Protein	IL24	7.70156	7.63387	7.62835	0.52	(0.47 - 0.58)	-0.067693	0.144018	0.373683	0.52	(0.45 - 0.58)	-0.0732114	0.160021	0.338044
SL007228	Protein	PRKCI	11.0794	11.1003	11.128	0.52	(0.46 - 0.57)	0.0208307	0.686003	0.840633	0.52	(0.45 - 0.59)	0.0485933	0.48127	0.669988
SL005250	Protein	CMA1	9.05774	9.04626	9.04716	0.52	(0.46 - 0.57)	-0.0114815	0.725161	0.863099	0.52	(0.45 - 0.59)	-0.0105799	0.798878	0.89633
SL011529	Protein	SBDS	13.5781	13.6418	13.645	0.52	(0.47 - 0.57)	0.0637293	0.454658	0.680682	0.52	(0.45 - 0.58)	0.0669111	0.520764	0.694733
SL000537	Protein	PDGFB	14.2274	14.3121	14.2936	0.52	(0.47 - 0.58)	0.0847412	0.316203	0.561657	0.52	(0.45 - 0.59)	0.0662404	0.529431	0.701206
SL017611	Protein	YWHAB,YWHAE,YWHAG,YWHAH,YWHAQ,YWHAZ,SFN	12.2402	12.3006	12.3057	0.52	(0.46 - 0.57)	0.0603588	0.46216	0.685733	0.52	(0.46 - 0.59)	0.0654437	0.502782	0.685244
SL004757	Protein	VTA1	14.6919	14.7633	14.7579	0.52	(0.47 - 0.58)	0.0713895	0.330565	0.571679	0.52	(0.46 - 0.59)	0.0659871	0.466266	0.65818
SL004812	Protein	TPI1	13.3392	13.3881	13.3655	0.52	(0.47 - 0.58)	0.0488317	0.448837	0.676055	0.52	(0.45 - 0.58)	0.0262998	0.742799	0.863957
SL005188	Protein	IL5RA	10.7637	10.8125	10.8126	0.52	(0.47 - 0.57)	0.0488914	0.432522	0.664511	0.52	(0.45 - 0.59)	0.0488998	0.513047	0.690066
SL007729	Protein	ERAP1	15.9444	15.9962	15.94	0.52	(0.46 - 0.57)	0.0518243	0.319759	0.563012	0.52	(0.45 - 0.58)	-0.00439849	0.944379	0.977343
SL006920	Protein	MAPK14	11.0331	11.0696	11.0561	0.52	(0.47 - 0.58)	0.0364686	0.551454	0.753401	0.52	(0.45 - 0.58)	0.0229442	0.759198	0.873997
SL005846	Protein	MSN	9.55805	9.58379	9.60894	0.52	(0.47 - 0.58)	0.02574	0.677698	0.837215	0.52	(0.45 - 0.58)	0.0508854	0.589682	0.752001
SL016551	Protein	CSNK2A2 CSNK2B	9.00045	9.05072	9.05288	0.52	(0.47 - 0.57)	0.0502732	0.446811	0.674771	0.52	(0.46 - 0.59)	0.0524302	0.520844	0.694733
SL011808	Protein	CPNE1	11.6166	11.6873	11.6953	0.52	(0.47 - 0.58)	0.0707176	0.429025	0.660758	0.52	(0.45 - 0.58)	0.0786623	0.444869	0.639233
SL000553	Protein	PRKCB	12.3379	12.4143	12.3934	0.52	(0.47 - 0.57)	0.0764265	0.435086	0.665532	0.52	(0.45 - 0.58)	0.0554487	0.642128	0.786456
SL010467	Protein	RGMA	14.12	14.1415	14.1169	0.52	(0.47 - 0.57)	0.0215286	0.352606	0.588257	0.52	(0.45 - 0.59)	-0.00307032	0.916463	0.961054
SL005155	Protein	TDGF1	9.86215	9.94993	9.87197	0.52	(0.47 - 0.58)	0.0877749	0.486933	0.703466	0.52	(0.45 - 0.58)	0.00982206	0.950661	0.979702			*	*
SL003170	Protein	CCL26	10.2077	10.182	10.1992	0.52	(0.46 - 0.57)	-0.0256615	0.579418	0.777773	0.52	(0.45 - 0.58)	-0.00851335	0.867247	0.933998
SL008591	Protein	TFF1	12.0674	12.1216	12.1133	0.52	(0.46 - 0.57)	0.0542592	0.410045	0.641645	0.52	(0.45 - 0.59)	0.0459572	0.559093	0.729065
PeakAR	Echo Imaging	Peak AR	28.2301	27.7106	27.6983	0.51	(0.46 - 0.56)	-0.519463	0.484248	0.701267	0.52	(0.45 - 0.59)	-0.531818	0.57049	0.735975
Hex1Cer(d18:1/20:0)	Lipid	Hex1Cer(d18:1/20:0)	-8.18381	-8.16271	-8.14107	0.51	(0.46 - 0.56)	0.021101	0.669277	0.832652	0.52	(0.46 - 0.59)	0.042737	0.475584	0.666448
Hex1Cer(d18:1/24:0)	Lipid	Hex1Cer(d18:1/24:0)	-3.11888	-3.13866	-3.10989	0.51	(0.45 - 0.56)	-0.0197826	0.681627	0.837887	0.52	(0.45 - 0.59)	0.00898161	0.892575	0.945737
LPE 18:0	Lipid	LPE 18:0	-1.50463	-1.48062	-1.46452	0.51	(0.46 - 0.56)	0.0240132	0.610457	0.794817	0.52	(0.46 - 0.59)	0.0401105	0.508529	0.687966
PC(O-34:4)	Lipid	PC(O-34:4)	-6.45191	-6.45489	-6.45654	0.51	(0.46 - 0.56)	-0.00298492	0.856031	0.930457	0.52	(0.45 - 0.58)	-0.00463056	0.820763	0.905675
PC(O-40:6)	Lipid	PC(O-40:6)	-8.05874	-8.03879	-8.06837	0.51	(0.45 - 0.56)	0.0199498	0.667008	0.8313	0.52	(0.45 - 0.58)	-0.00962314	0.867822	0.933998
PC(P-36:5)	Lipid	PC(P-36:5)	-7.0861	-7.10331	-7.13939	0.51	(0.45 - 0.56)	-0.0172119	0.830449	0.916694	0.52	(0.46 - 0.59)	-0.0532932	0.568646	0.734157
PC(P-38:5)	Lipid	PC(P-38:5)	-5.87013	-5.903	-5.90719	0.51	(0.46 - 0.57)	-0.0328701	0.443664	0.672268	0.52	(0.45 - 0.59)	-0.0370576	0.497597	0.680466
PE 40:7	Lipid	PE 40:7	-2.62389	-2.63814	-2.58245	0.51	(0.46 - 0.56)	-0.0142482	0.834972	0.918237	0.52	(0.45 - 0.58)	0.0414471	0.63474	0.781289
PE(O-40:5)	Lipid	PE(O-40:5)	-5.22678	-5.23	-5.17877	0.51	(0.45 - 0.56)	-0.00322373	0.965726	0.989581	0.52	(0.46 - 0.59)	0.0480081	0.636638	0.783056
PE(P-16:0/20:3)	Lipid	PE(P-16:0/20:3)	-5.34755	-5.33764	-5.31635	0.51	(0.46 - 0.57)	0.00990761	0.881759	0.947118	0.52	(0.45 - 0.58)	0.0312001	0.6986	0.830605
PI 36:4	Lipid	PI 36:4	-1.10445	-1.08276	-1.05905	0.51	(0.45 - 0.56)	0.0216891	0.717189	0.858965	0.52	(0.45 - 0.58)	0.0454083	0.548517	0.719716
SM 33:1	Lipid	SM 33:1	-1.64658	-1.63717	-1.61918	0.51	(0.45 - 0.56)	0.0094101	0.81936	0.914261	0.52	(0.45 - 0.59)	0.027397	0.61582	0.766373
TG 50:2	Lipid	TG 50:2	0.707933	0.733628	0.776657	0.51	(0.45 - 0.56)	0.0256954	0.771417	0.892941	0.52	(0.46 - 0.59)	0.0687239	0.524005	0.696038
SL007229	Protein	STAT6	8.84666	8.79305	8.8038	0.51	(0.46 - 0.57)	-0.053613	0.358988	0.594793	0.52	(0.45 - 0.58)	-0.0428608	0.506893	0.686968
SL004081	Protein	DCN	11.5994	11.6121	11.6251	0.51	(0.46 - 0.57)	0.0127209	0.616076	0.798442	0.52	(0.45 - 0.59)	0.0256636	0.481003	0.669988
SL003197	Protein	CCL25	10.1427	10.161	10.184	0.51	(0.46 - 0.56)	0.0183253	0.782255	0.897414	0.52	(0.46 - 0.59)	0.0412683	0.608615	0.761792
SL004723	Protein	HDAC8	10.9362	10.9309	10.9463	0.51	(0.45 - 0.56)	-0.00533045	0.809883	0.910042	0.52	(0.46 - 0.59)	0.01016	0.711816	0.840649
SL000131	Protein	PCNA	7.56552	7.58573	7.60328	0.51	(0.46 - 0.56)	0.0202096	0.637115	0.816319	0.52	(0.45 - 0.59)	0.0377564	0.587277	0.750354
SL000047	Protein	IGF1	9.90912	9.89111	9.9183	0.51	(0.46 - 0.57)	-0.0180035	0.528655	0.733189	0.52	(0.45 - 0.58)	0.00918688	0.790553	0.893071
SL000437	Protein	HP	14.7763	14.748	14.696	0.51	(0.45 - 0.56)	-0.0283009	0.756468	0.884599	0.52	(0.45 - 0.59)	-0.0803409	0.461739	0.65355
SL005204	Protein	KLRK1	9.30201	9.32049	9.31596	0.51	(0.46 - 0.57)	0.018477	0.784747	0.897414	0.52	(0.46 - 0.59)	0.0139516	0.865585	0.933802
SL008956	Protein	ARSB	10.0001	9.9752	9.96393	0.51	(0.45 - 0.56)	-0.0249484	0.652506	0.826483	0.52	(0.45 - 0.59)	-0.0362147	0.587407	0.750354
SL000678	Protein	GNLY	11.0975	11.096	11.1263	0.51	(0.45 - 0.56)	-0.00150829	0.977995	0.993609	0.52	(0.45 - 0.58)	0.0287961	0.654158	0.796369
SL010461	Protein	FCGR1A	8.36045	8.36529	8.36937	0.51	(0.46 - 0.57)	0.00483809	0.922455	0.96649	0.52	(0.46 - 0.59)	0.0089176	0.877106	0.939956
SL010522	Protein	CDK8 CCNC	10.3103	10.2954	10.2795	0.51	(0.46 - 0.57)	-0.0148774	0.622378	0.80397	0.52	(0.46 - 0.59)	-0.030797	0.370607	0.574611
SL006550	Protein	ECM1	14.0847	14.0998	14.0715	0.51	(0.46 - 0.56)	0.0150904	0.527607	0.733189	0.52	(0.45 - 0.59)	-0.0132002	0.669159	0.806505
SL010613	Protein	IL17RD	8.98826	8.97597	8.95347	0.51	(0.45 - 0.56)	-0.0122895	0.677493	0.837215	0.52	(0.45 - 0.59)	-0.0347965	0.279554	0.486556
SL004712	Protein	CXCL12	12.3544	12.3573	12.3485	0.51	(0.46 - 0.56)	0.00294406	0.901073	0.955341	0.52	(0.45 - 0.59)	-0.00589357	0.847286	0.922624
SL011530	Protein	DYNLRB1	10.1918	10.1805	10.1511	0.51	(0.45 - 0.56)	-0.0113364	0.882109	0.947118	0.52	(0.45 - 0.59)	-0.0406535	0.671613	0.808423
SL003186	Protein	XCL1	8.70036	8.72318	8.69274	0.51	(0.45 - 0.56)	0.0228151	0.521385	0.728543	0.52	(0.45 - 0.59)	-0.00761944	0.861171	0.930517
SL000124	Protein	MMP2	12.8028	12.8049	12.8241	0.51	(0.46 - 0.56)	0.00203572	0.938933	0.97589	0.52	(0.46 - 0.59)	0.021242	0.50898	0.687966
SL004795	Protein	HSD17B10	9.83024	9.7952	9.77861	0.51	(0.46 - 0.57)	-0.0350464	0.584632	0.781668	0.52	(0.45 - 0.59)	-0.0516317	0.511914	0.690066
SL006713	Protein	COLEC11	13.5431	13.5625	13.5728	0.51	(0.45 - 0.56)	0.0193671	0.716996	0.858965	0.52	(0.45 - 0.58)	0.029678	0.650588	0.794431
SL006460	Protein	GP1BA	10.4203	10.4062	10.4184	0.51	(0.46 - 0.57)	-0.0140983	0.664378	0.830473	0.52	(0.45 - 0.59)	-0.00185987	0.968112	0.985774
SL009868	Protein	SSRP1	9.03551	9.07886	9.03203	0.51	(0.46 - 0.56)	0.0433489	0.402227	0.635293	0.52	(0.45 - 0.59)	-0.00348057	0.952733	0.980584
SL004849	Protein	IL1RAPL2	10.0143	10.0065	9.99261	0.51	(0.46 - 0.56)	-0.00782563	0.903795	0.956427	0.52	(0.45 - 0.59)	-0.0216762	0.785852	0.891336
SL005174	Protein	IL17RB	10.3581	10.3291	10.3863	0.51	(0.45 - 0.56)	-0.0289388	0.586871	0.783422	0.52	(0.45 - 0.59)	0.0282712	0.681696	0.816489
SL005195	Protein	LAG3	12.7505	12.7322	12.7229	0.51	(0.46 - 0.56)	-0.0182517	0.681439	0.837887	0.52	(0.45 - 0.58)	-0.0276089	0.642195	0.786456
SL005222	Protein	SCARF2	8.31296	8.31394	8.25277	0.51	(0.46 - 0.57)	0.0009858	0.986808	0.995493	0.52	(0.45 - 0.59)	-0.0601833	0.342956	0.548548
SL016548	Protein	PRKAA1 PRKAB1 PRKAG1	8.70427	8.68387	8.63739	0.51	(0.46 - 0.57)	-0.0204005	0.720661	0.860719	0.52	(0.45 - 0.59)	-0.0668795	0.279368	0.486556
SL006189	Protein	KIF23	10.2396	10.2269	10.241	0.51	(0.46 - 0.57)	-0.0127249	0.827056	0.915341	0.52	(0.45 - 0.58)	0.00141169	0.98384	0.993264
SL003722	Protein	AKT2	13.3743	13.3911	13.3165	0.51	(0.45 - 0.56)	0.0168766	0.813023	0.912963	0.52	(0.45 - 0.58)	-0.0578144	0.519147	0.694634
SL011498	Protein	ADCYAP1	8.05388	7.99441	8.00441	0.51	(0.46 - 0.56)	-0.059474	0.304099	0.553095	0.52	(0.45 - 0.58)	-0.049467	0.432459	0.630623
SL000062	Protein	KLK3	10.7333	10.8033	10.8552	0.51	(0.46 - 0.57)	0.06998	0.679591	0.837628	0.52	(0.45 - 0.59)	0.121893	0.578632	0.744207
SL018891	Protein	DSCAM	10.2417	10.1948	10.1836	0.51	(0.46 - 0.57)	-0.0469279	0.350389	0.586295	0.52	(0.46 - 0.59)	-0.0580818	0.291296	0.499214
Cer(d18:1/18:0)	Lipid	Cer(d18:1/18:0)	-7.11565	-7.10704	-7.05343	0.5	(0.45 - 0.56)	0.00860854	0.86805	0.940991	0.52	(0.46 - 0.59)	0.0622129	0.31633	0.521214
Cer(d18:1/23:0)	Lipid	Cer(d18:1/23:0)	-3.21254	-3.22406	-3.18557	0.5	(0.44 - 0.55)	-0.0115267	0.801582	0.904298	0.52	(0.45 - 0.58)	0.0269656	0.63407	0.781034
Cer(m18:2/22:0)	Lipid	Cer(m18:2/22:0)	-2.8409	-2.82767	-2.78205	0.5	(0.44 - 0.55)	0.0132274	0.802362	0.904298	0.52	(0.46 - 0.59)	0.0588505	0.362204	0.565476
LPC 20:2	Lipid	LPC 20:2	-7.02924	-7.03909	-7.07368	0.5	(0.44 - 0.55)	-0.00984318	0.817703	0.914261	0.52	(0.45 - 0.58)	-0.0444405	0.409976	0.61315
LPC 26:0	Lipid	LPC 26:0	-7.88907	-7.88763	-7.87159	0.5	(0.45 - 0.55)	0.00144156	0.938735	0.97589	0.52	(0.45 - 0.59)	0.0174777	0.474097	0.665468
PC(P-36:4)	Lipid	PC(P-36:4)	-4.06593	-4.07681	-4.10355	0.5	(0.44 - 0.55)	-0.0108745	0.798182	0.903982	0.52	(0.45 - 0.59)	-0.0376155	0.490202	0.675177
PC(P-38:4)	Lipid	PC(P-38:4)	-6.50032	-6.49952	-6.51225	0.5	(0.45 - 0.56)	0.000804581	0.987247	0.995493	0.52	(0.45 - 0.58)	-0.0119274	0.849198	0.923884
PE 39:6	Lipid	PE 39:6	-4.9638	-4.96737	-4.91864	0.5	(0.45 - 0.55)	-0.00357344	0.957272	0.987028	0.52	(0.46 - 0.59)	0.0451629	0.567258	0.733485
PE(P-20:1/22:6)	Lipid	PE(P-20:1/22:6)	-6.55976	-6.58181	-6.62868	0.5	(0.45 - 0.55)	-0.0220561	0.731425	0.868009	0.52	(0.45 - 0.58)	-0.068924	0.36219	0.565476
SM 32:0	Lipid	SM 32:0	-6.2228	-6.22482	-6.18371	0.5	(0.44 - 0.55)	-0.00202039	0.96858	0.989581	0.52	(0.45 - 0.59)	0.0390882	0.544654	0.715203
SM 33:2	Lipid	SM 33:2	-7.2223	-7.24461	-7.21846	0.5	(0.44 - 0.55)	-0.0223146	0.636969	0.816319	0.52	(0.45 - 0.58)	0.00384055	0.948319	0.978524
TG 51:1	Lipid	TG 51:1	-2.01159	-2.00071	-1.91923	0.5	(0.44 - 0.55)	0.0108761	0.923256	0.96673	0.52	(0.45 - 0.58)	0.0923615	0.486035	0.673278
SL008931	Protein	CD177	9.36907	9.33321	9.4885	0.5	(0.44 - 0.55)	-0.0358652	0.733508	0.868108	0.52	(0.46 - 0.59)	0.119432	0.377504	0.58055
SL017106	Protein	IFNA10	8.51981	8.56199	8.57592	0.5	(0.45 - 0.55)	0.042184	0.498636	0.70916	0.52	(0.45 - 0.59)	0.0561109	0.512343	0.690066
SL004337	Protein	FGF19	13.3683	13.4019	13.4737	0.5	(0.45 - 0.55)	0.0335941	0.71188	0.857639	0.52	(0.46 - 0.59)	0.105458	0.341652	0.548331
SL001717	Protein	IL10	7.77949	7.76142	7.79096	0.5	(0.44 - 0.55)	-0.0180677	0.758916	0.885752	0.52	(0.45 - 0.58)	0.0114654	0.887813	0.943472
SL000506	Protein	CGA LHB	10.431	10.4116	10.4361	0.5	(0.45 - 0.55)	-0.0194652	0.820102	0.914261	0.52	(0.45 - 0.58)	0.00509395	0.961192	0.984494
SL004856	Protein	DSG1	11.1296	11.1302	11.1366	0.5	(0.45 - 0.56)	0.000568739	0.979307	0.993609	0.52	(0.46 - 0.59)	0.00690873	0.797331	0.895937
SL004516	Protein	MBL2	13.6381	13.6242	13.5693	0.5	(0.45 - 0.55)	-0.0139672	0.848926	0.928121	0.52	(0.45 - 0.58)	-0.0688162	0.489577	0.674905
SL010458	Protein	ESM1	10.2277	10.2354	10.2841	0.5	(0.44 - 0.55)	0.00772488	0.85368	0.928988	0.52	(0.46 - 0.59)	0.0564077	0.327611	0.533393
SL008102	Protein	MDH1	14.7919	14.7849	14.7395	0.5	(0.45 - 0.55)	-0.00708669	0.865602	0.938939	0.52	(0.46 - 0.59)	-0.0524064	0.316226	0.521214
SL003658	Protein	AKR7A2	11.6072	11.6308	11.5514	0.5	(0.44 - 0.55)	0.0236542	0.784732	0.897414	0.52	(0.46 - 0.59)	-0.055807	0.605552	0.761174
SL007022	Protein	SYNCRIP	11.1906	11.1963	11.2087	0.5	(0.44 - 0.55)	0.00567698	0.830111	0.916694	0.52	(0.45 - 0.58)	0.0180323	0.557435	0.727464
SL012740	Protein	ADAMTS15	8.70416	8.74538	8.74142	0.5	(0.45 - 0.56)	0.0412187	0.166509	0.410803	0.52	(0.45 - 0.59)	0.0372538	0.391973	0.596251
SL008644	Protein	BST1	12.808	12.7581	12.6923	0.5	(0.45 - 0.55)	-0.0499264	0.503985	0.713944	0.52	(0.45 - 0.59)	-0.115689	0.275964	0.484608
SL012457	Protein	NXPH1	12.8609	12.8596	12.841	0.5	(0.44 - 0.55)	-0.00128821	0.969672	0.989581	0.52	(0.46 - 0.59)	-0.0198765	0.639465	0.784819
SL011100	Protein	CD226	9.69165	9.7037	9.67845	0.5	(0.45 - 0.56)	0.0120489	0.756205	0.884599	0.52	(0.45 - 0.58)	-0.0132033	0.774368	0.880674
SL010488	Protein	ABL2	10.8339	10.8081	10.7946	0.5	(0.45 - 0.55)	-0.0257921	0.404196	0.637213	0.52	(0.45 - 0.59)	-0.03937	0.276141	0.484608
SL014488	Protein	VAV1	12.0985	12.1208	12.0272	0.5	(0.45 - 0.56)	0.0222655	0.796802	0.903982	0.52	(0.46 - 0.59)	-0.0712937	0.504614	0.685529
SL000655	Protein	KRT18	10.0637	10.025	10.056	0.5	(0.45 - 0.56)	-0.0387292	0.393532	0.627423	0.52	(0.45 - 0.58)	-0.00775388	0.894222	0.946442
Hex2Cer(d18:2/16:0)	Lipid	Hex2Cer(d18:2/16:0)	-7.49153	-7.52697	-7.46037	0.49	(0.43 - 0.54)	-0.0354339	0.435155	0.665532	0.52	(0.45 - 0.59)	0.0311636	0.610876	0.762276
LPE(P-20:0)	Lipid	LPE(P-20:0)	-9.00113	-8.96567	-8.92712	0.49	(0.44 - 0.54)	0.0354652	0.44461	0.672686	0.52	(0.45 - 0.59)	0.074015	0.189711	0.380302
PC(O-40:7)	Lipid	PC(O-40:7)	-6.61619	-6.62033	-6.65408	0.49	(0.44 - 0.55)	-0.00414006	0.925557	0.968442	0.52	(0.45 - 0.59)	-0.0378931	0.509258	0.687966
SM 34:3	Lipid	SM 34:3	-8.54924	-8.56008	-8.53993	0.49	(0.44 - 0.55)	-0.0108323	0.791642	0.901903	0.52	(0.45 - 0.59)	0.00930987	0.856869	0.928381
TG 51:2	Lipid	TG 51:2	-0.906215	-0.920086	-0.823228	0.49	(0.43 - 0.54)	-0.0138713	0.878873	0.94647	0.52	(0.45 - 0.59)	0.0829873	0.443647	0.63864
SL000546	Protein	PRL	10.7261	10.672	10.6432	0.49	(0.44 - 0.55)	-0.054123	0.336656	0.575132	0.52	(0.46 - 0.59)	-0.082941	0.22088	0.42227
SL004136	Protein	TYRO3	8.91757	8.94513	8.91738	0.49	(0.44 - 0.55)	0.0275617	0.373407	0.609214	0.52	(0.45 - 0.59)	-0.000187505	0.996493	0.997649
SL001720	Protein	VCAM1	13.788	13.778	13.8082	0.49	(0.44 - 0.54)	-0.00996513	0.757036	0.884599	0.52	(0.45 - 0.59)	0.0202251	0.624681	0.772848
SL004823	Protein	PPIA	17.0725	17.0866	17.0482	0.49	(0.44 - 0.55)	0.0141037	0.717668	0.858965	0.52	(0.46 - 0.59)	-0.0243476	0.599917	0.757494
SL015728	Protein	GCKR	9.1529	9.16117	9.23176	0.49	(0.43 - 0.54)	0.00826659	0.840841	0.923341	0.52	(0.45 - 0.58)	0.078855	0.256045	0.463294
PC 36:5	Lipid	PC 36:5	-1.5678	-1.66008	-1.65218	0.48	(0.42 - 0.53)	-0.092276	0.259215	0.505384	0.52	(0.45 - 0.59)	-0.0843785	0.394753	0.598074
SL001797	Protein	KLK6	11.1335	11.0981	11.1413	0.56	(0.5 - 0.61)	-0.0353539	0.207646	0.456725	0.51	(0.44 - 0.57)	0.00781754	0.830781	0.912294
SL000497	Protein	LAMA1 LAMB1 LAMC1	11.1877	11.1381	11.2001	0.55	(0.5 - 0.6)	-0.049594	0.0777509	0.271221	0.51	(0.44 - 0.57)	0.0124577	0.727798	0.852968
SL005217	Protein	SIGLEC6	7.83476	7.77151	7.81737	0.55	(0.49 - 0.6)	-0.063253	0.115969	0.325705	0.51	(0.44 - 0.57)	-0.0173889	0.713707	0.841706
SL008639	Protein	IDS	11.3774	11.4264	11.3626	0.55	(0.5 - 0.6)	0.0490455	0.305378	0.554338	0.51	(0.45 - 0.58)	-0.0147172	0.793641	0.894962
Hex1Cer(d16:1/22:0)	Lipid	Hex1Cer(d16:1/22:0)	-8.40236	-8.48007	-8.42155	0.54	(0.48 - 0.59)	-0.0777004	0.177714	0.423024	0.51	(0.44 - 0.57)	-0.0191842	0.799193	0.89633
SL000515	Protein	CCL8	7.80879	7.80711	7.84437	0.54	(0.49 - 0.59)	-0.00167587	0.956404	0.987028	0.51	(0.44 - 0.58)	0.035581	0.53519	0.706314
SL005227	Protein	ULBP1	8.85333	8.77433	8.83468	0.54	(0.49 - 0.6)	-0.0789949	0.257304	0.505384	0.51	(0.44 - 0.58)	-0.0186481	0.835005	0.915148
SL007888	Protein	CST4	7.4908	7.40429	7.50508	0.54	(0.49 - 0.6)	-0.0865049	0.175692	0.421163	0.51	(0.44 - 0.57)	0.01429	0.887972	0.943472
SL003304	Protein	IGF1R	12.75	12.7196	12.7505	0.54	(0.48 - 0.59)	-0.0303606	0.29664	0.546103	0.51	(0.45 - 0.58)	0.000552987	0.987052	0.994111
SL007680	Protein	ROBO2	11.7135	11.6779	11.6999	0.54	(0.48 - 0.59)	-0.0355787	0.150145	0.385261	0.51	(0.44 - 0.58)	-0.0135577	0.652438	0.795099
SL012707	Protein	PCSK9	9.51235	9.47063	9.50908	0.54	(0.49 - 0.59)	-0.0417162	0.232706	0.480773	0.51	(0.44 - 0.58)	-0.00326666	0.944052	0.977343
SL008574	Protein	OMD	12.6412	12.5813	12.6219	0.54	(0.48 - 0.59)	-0.0598887	0.194298	0.44014	0.51	(0.44 - 0.57)	-0.0192227	0.751209	0.870146
Cer(d19:1/24:1)	Lipid	Cer(d19:1/24:1)	-5.17125	-5.23847	-5.18752	0.53	(0.48 - 0.58)	-0.0672262	0.319817	0.563012	0.51	(0.45 - 0.58)	-0.0162706	0.836583	0.915988
SL003848	Protein	ANXA5	9.72705	9.73331	9.70677	0.53	(0.48 - 0.58)	0.00626555	0.913591	0.961974	0.51	(0.45 - 0.58)	-0.0202785	0.712893	0.841333
SL003168	Protein	CCL27	10.1882	10.2003	10.1686	0.53	(0.47 - 0.58)	0.0120814	0.642245	0.821024	0.51	(0.45 - 0.58)	-0.0196716	0.551013	0.722429
SL003332	Protein	MMP17	9.80898	9.77375	9.82613	0.53	(0.48 - 0.59)	-0.0352304	0.287969	0.537754	0.51	(0.44 - 0.58)	0.0171496	0.70069	0.831578
SL002525	Protein	C2	11.5141	11.4998	11.4975	0.53	(0.47 - 0.58)	-0.0143622	0.457726	0.682735	0.51	(0.44 - 0.58)	-0.0166179	0.516756	0.69256
SL004920	Protein	CFL1	12.8015	12.8515	12.8127	0.53	(0.48 - 0.58)	0.0499756	0.196035	0.440886	0.51	(0.44 - 0.57)	0.0112124	0.813301	0.904809
SL005208	Protein	RTN4R	10.7707	10.7981	10.7699	0.53	(0.48 - 0.59)	0.0273313	0.433028	0.664684	0.51	(0.44 - 0.58)	-0.000873151	0.984603	0.993289
SL004366	Protein	TNFRSF12A	7.23977	7.31941	7.26414	0.53	(0.48 - 0.58)	0.0796359	0.236311	0.48312	0.51	(0.44 - 0.57)	0.0243708	0.760979	0.873997
SL004400	Protein	F9	12.989	12.9597	12.935	0.53	(0.47 - 0.58)	-0.0292459	0.422913	0.655709	0.51	(0.44 - 0.58)	-0.0539114	0.156758	0.333316
SL000401	Protein	ELANE	8.88586	8.86749	8.95494	0.53	(0.47 - 0.58)	-0.0183685	0.722183	0.861927	0.51	(0.44 - 0.57)	0.0690858	0.381456	0.583882
SL003717	Protein	CASP10	11.9809	11.9951	11.9707	0.53	(0.48 - 0.59)	0.0142652	0.503696	0.713944	0.51	(0.44 - 0.57)	-0.0101795	0.662678	0.802583
Cer(d18:0/23:0)	Lipid	Cer(d18:0/23:0)	-5.06386	-5.0881	-5.05205	0.52	(0.47 - 0.58)	-0.0242352	0.623671	0.80397	0.51	(0.44 - 0.58)	0.0118143	0.853346	0.926835
Cer(d18:0/24:1)	Lipid	Cer(d18:0/24:1)	-0.258795	-0.289858	-0.26732	0.52	(0.46 - 0.57)	-0.0310632	0.508327	0.717089	0.51	(0.44 - 0.58)	-0.00852426	0.881074	0.943012
Cer(d18:1/22:0)	Lipid	Cer(d18:1/22:0)	-3.2512	-3.27506	-3.20045	0.52	(0.47 - 0.57)	-0.0238519	0.644429	0.822571	0.51	(0.45 - 0.58)	0.0507522	0.4056	0.609844
Cer(d18:2/23:0)	Lipid	Cer(d18:2/23:0)	-5.80931	-5.85468	-5.81661	0.52	(0.47 - 0.57)	-0.0453718	0.490176	0.704419	0.51	(0.44 - 0.57)	-0.00730234	0.929228	0.96938
LPC(O-20:0)	Lipid	LPC(O-20:0)	-8.82619	-8.79572	-8.81193	0.52	(0.47 - 0.57)	0.0304749	0.49893	0.70916	0.51	(0.44 - 0.58)	0.0142642	0.822074	0.905675
PC 40:4	Lipid	PC 40:4	-6.83077	-6.86188	-6.85562	0.52	(0.47 - 0.58)	-0.0311075	0.595943	0.787635	0.51	(0.45 - 0.58)	-0.0248563	0.718612	0.845721
PC(P-34:2)	Lipid	PC(P-34:2)	-4.42121	-4.39182	-4.39323	0.52	(0.47 - 0.58)	0.0293874	0.576099	0.775782	0.51	(0.44 - 0.58)	0.0279765	0.668246	0.806505
PE(P-16:0/20:5)	Lipid	PE(P-16:0/20:5)	-4.02281	-3.97505	-3.99173	0.52	(0.46 - 0.57)	0.0477623	0.596596	0.787635	0.51	(0.44 - 0.58)	0.0310775	0.772126	0.878716
SM 37:2	Lipid	SM 37:2	-3.17528	-3.16402	-3.16843	0.52	(0.47 - 0.57)	0.0112566	0.823366	0.91459	0.51	(0.44 - 0.58)	0.00684321	0.917266	0.961054
TG(O-54:4)	Lipid	TG(O-54:4)	-2.94724	-3.00097	-2.98893	0.52	(0.47 - 0.58)	-0.0537386	0.480599	0.697187	0.51	(0.44 - 0.58)	-0.0416932	0.656492	0.797889
SL007136	Protein	CEBPB	10.0176	10.0131	10.0491	0.52	(0.47 - 0.57)	-0.00455385	0.911367	0.96023	0.51	(0.44 - 0.57)	0.0314326	0.590685	0.752266
SL004101	Protein	SMAD2	12.8683	12.9222	12.908	0.52	(0.46 - 0.57)	0.0538613	0.487015	0.703466	0.51	(0.45 - 0.58)	0.0397203	0.67776	0.812927
SL005179	Protein	IL36B	9.09514	9.09592	9.09287	0.52	(0.47 - 0.58)	0.000780596	0.985405	0.995193	0.51	(0.44 - 0.58)	-0.00226985	0.963036	0.985324
SL003280	Protein	HMGB1	12.4417	12.4436	12.4782	0.52	(0.47 - 0.57)	0.00182591	0.966863	0.989581	0.51	(0.44 - 0.58)	0.0364819	0.56232	0.730454
SL004009	Protein	RAC1	14.9515	14.9968	14.9578	0.52	(0.46 - 0.57)	0.045334	0.478593	0.69606	0.51	(0.44 - 0.57)	0.00628279	0.936687	0.97301
SL003302	Protein	CCL23	11.8705	11.8645	11.9053	0.52	(0.46 - 0.57)	-0.00605508	0.875636	0.946375	0.51	(0.44 - 0.58)	0.0348236	0.522604	0.695
SL000468	Protein	IGHM IGJ IGK@ IGL@	11.5389	11.4749	11.5148	0.52	(0.47 - 0.58)	-0.0640126	0.389592	0.623495	0.51	(0.44 - 0.57)	-0.0240887	0.796358	0.895937
SL005228	Protein	ULBP2	8.4991	8.45339	8.53205	0.52	(0.47 - 0.57)	-0.0457064	0.439803	0.669007	0.51	(0.44 - 0.57)	0.0329504	0.693582	0.825917
SL005087	Protein	IGFBP7	15.7166	15.7066	15.7226	0.52	(0.47 - 0.57)	-0.00994079	0.700172	0.852345	0.51	(0.45 - 0.58)	0.00601222	0.859283	0.92936
SL010521	Protein	BTK	13.2174	13.3052	13.2522	0.52	(0.46 - 0.57)	0.0877587	0.356844	0.592986	0.51	(0.44 - 0.57)	0.0347706	0.767332	0.877396
SL004155	Protein	PDGFRB	12.0206	12.0574	12.0435	0.52	(0.46 - 0.57)	0.03684	0.596795	0.787635	0.51	(0.45 - 0.58)	0.022975	0.793815	0.894962
SL000342	Protein	CAT	14.2422	14.24	14.2403	0.52	(0.46 - 0.57)	-0.00214724	0.962622	0.989416	0.51	(0.44 - 0.57)	-0.00185925	0.973894	0.987052
SL010518	Protein	TEC	10.9954	11.0063	10.9232	0.52	(0.47 - 0.58)	0.0108678	0.895974	0.954064	0.51	(0.44 - 0.57)	-0.072274	0.459176	0.651012
SL011549	Protein	ARID3A	9.25776	9.28918	9.26242	0.52	(0.47 - 0.58)	0.0314214	0.477582	0.695919	0.51	(0.44 - 0.58)	0.00466736	0.930121	0.969712
SL004938	Protein	CAMKK1	8.68729	8.70495	8.6809	0.52	(0.47 - 0.57)	0.0176555	0.706123	0.854834	0.51	(0.45 - 0.58)	-0.00638797	0.90796	0.956045
SL013570	Protein	DYRK3	11.178	11.1556	11.2036	0.52	(0.47 - 0.58)	-0.0223198	0.369969	0.606447	0.51	(0.44 - 0.58)	0.0256833	0.515772	0.691789
SL014088	Protein	FCRL3	8.59954	8.68968	8.63419	0.52	(0.47 - 0.57)	0.0901342	0.0250311	0.129335	0.51	(0.44 - 0.58)	0.0346424	0.454181	0.648199
SL005214	Protein	SEMA6A	13.2172	13.2659	13.2423	0.52	(0.47 - 0.58)	0.0486776	0.217485	0.463763	0.51	(0.45 - 0.58)	0.0250273	0.623047	0.771391
SL003080	Protein	MIF	10.7161	10.7325	10.7093	0.52	(0.46 - 0.57)	0.0164185	0.681713	0.837887	0.51	(0.44 - 0.57)	-0.00682663	0.887382	0.943472
SL009790	Protein	SNRPF	11.3426	11.3367	11.3221	0.52	(0.47 - 0.57)	-0.00590961	0.857231	0.930457	0.51	(0.44 - 0.58)	-0.020456	0.583675	0.748983
SL005685	Protein	EEF1B2	9.66015	9.60314	9.6513	0.52	(0.47 - 0.58)	-0.0570074	0.35863	0.594793	0.51	(0.44 - 0.58)	-0.00884978	0.916806	0.961054
SL007242	Protein	MAP2K3	11.2448	11.2558	11.2483	0.52	(0.47 - 0.57)	0.0110258	0.820153	0.914261	0.51	(0.44 - 0.58)	0.00346255	0.95521	0.981937
SL003646	Protein	TPM4	16.2265	16.3012	16.2592	0.52	(0.47 - 0.58)	0.0747167	0.302454	0.551994	0.51	(0.44 - 0.58)	0.0327566	0.710704	0.839923
AcylCarnitine 18:2	Lipid	AcylCarnitine 18:2	-6.21683	-6.22563	-6.19465	0.51	(0.45 - 0.56)	-0.00880838	0.86976	0.94224	0.51	(0.44 - 0.58)	0.022176	0.761161	0.873997
LPC 16:1	Lipid	LPC 16:1	-3.20219	-3.23957	-3.24361	0.51	(0.46 - 0.57)	-0.0373758	0.514223	0.723577	0.51	(0.44 - 0.58)	-0.0414204	0.581748	0.747078
LPC(O-18:0)	Lipid	LPC(O-18:0)	-6.5983	-6.58785	-6.59468	0.51	(0.46 - 0.56)	0.010453	0.819514	0.914261	0.51	(0.44 - 0.57)	0.00362017	0.951374	0.979782
PC 38:2	Lipid	PC 38:2	-6.22336	-6.20574	-6.19622	0.51	(0.46 - 0.56)	0.0176217	0.653578	0.826483	0.51	(0.45 - 0.58)	0.0271433	0.586998	0.750354
PC(O-40:5)	Lipid	PC(O-40:5)	-7.57485	-7.56894	-7.56316	0.51	(0.45 - 0.56)	0.00590869	0.879265	0.94647	0.51	(0.44 - 0.58)	0.0116937	0.818436	0.905208
PC(P-37:4)	Lipid	PC(P-37:4)	-7.49639	-7.47254	-7.47822	0.51	(0.46 - 0.57)	0.0238529	0.64	0.819184	0.51	(0.44 - 0.57)	0.0181691	0.765236	0.876185
PC(P-40:4)	Lipid	PC(P-40:4)	-7.57485	-7.56894	-7.56316	0.51	(0.45 - 0.56)	0.00590869	0.879265	0.94647	0.51	(0.44 - 0.58)	0.0116937	0.818436	0.905208
PC(P-40:7)	Lipid	PC(P-40:7)	-8.98966	-9.00605	-9.01986	0.51	(0.45 - 0.56)	-0.0163811	0.768956	0.891313	0.51	(0.45 - 0.58)	-0.030199	0.660651	0.802084
PE(P-16:0/22:4)	Lipid	PE(P-16:0/22:4)	-5.21629	-5.21232	-5.22604	0.51	(0.45 - 0.56)	0.00397145	0.93381	0.97416	0.51	(0.45 - 0.58)	-0.00975005	0.86779	0.933998
PE(P-18:0/20:5)	Lipid	PE(P-18:0/20:5)	-3.41639	-3.3726	-3.36672	0.51	(0.46 - 0.57)	0.0437958	0.628866	0.808816	0.51	(0.45 - 0.58)	0.0496741	0.6467	0.790255
PE(P-18:0/22:4)	Lipid	PE(P-18:0/22:4)	-6.13293	-6.13525	-6.14045	0.51	(0.46 - 0.57)	-0.0023153	0.967995	0.989581	0.51	(0.44 - 0.57)	-0.00751487	0.916487	0.961054
PE(P-20:0/22:6)	Lipid	PE(P-20:0/22:6)	-5.81348	-5.79077	-5.79827	0.51	(0.46 - 0.56)	0.0227116	0.660784	0.829063	0.51	(0.45 - 0.58)	0.0152092	0.812144	0.904809
SM 35:1	Lipid	SM 35:1	-2.72465	-2.73587	-2.7334	0.51	(0.45 - 0.56)	-0.0112167	0.769534	0.891372	0.51	(0.45 - 0.58)	-0.00874889	0.856706	0.928381
TG 52:2	Lipid	TG 52:2	1.82196	1.8076	1.81894	0.51	(0.45 - 0.56)	-0.0143535	0.802631	0.904298	0.51	(0.44 - 0.57)	-0.00301333	0.965665	0.985774
TG(O-52:2)	Lipid	TG(O-52:2)	-2.20378	-2.20107	-2.13356	0.51	(0.45 - 0.56)	0.00270599	0.975447	0.993609	0.51	(0.45 - 0.58)	0.0702154	0.492817	0.676441
SL018921	Protein	N6AMT1	11.6802	11.6951	11.6772	0.51	(0.46 - 0.57)	0.0148978	0.799474	0.903982	0.51	(0.44 - 0.58)	-0.00304087	0.966055	0.985774
SL007223	Protein	BCL6	10.7784	10.7698	10.7601	0.51	(0.46 - 0.56)	-0.00867969	0.876266	0.946375	0.51	(0.45 - 0.58)	-0.0183772	0.797201	0.895937
SL007828	Protein	NRG4	9.74034	9.70856	9.72797	0.51	(0.46 - 0.57)	-0.0317796	0.460638	0.684677	0.51	(0.44 - 0.58)	-0.0123753	0.814102	0.904809
SL000557	Protein	PRKCZ	9.64661	9.65788	9.64867	0.51	(0.46 - 0.56)	0.0112691	0.748585	0.880649	0.51	(0.45 - 0.58)	0.00205708	0.963169	0.985324
SL005218	Protein	SIGLEC7	10.4939	10.4912	10.4979	0.51	(0.46 - 0.56)	-0.00268763	0.932016	0.972889	0.51	(0.45 - 0.58)	0.00404161	0.935325	0.972738
SL005226	Protein	CRLF2	10.4676	10.4564	10.4554	0.51	(0.45 - 0.56)	-0.0112357	0.719812	0.860719	0.51	(0.44 - 0.57)	-0.0122506	0.745644	0.86667
SL000309	Protein	C1QA C1QB C1QC	15.3054	15.3324	15.316	0.51	(0.45 - 0.56)	0.0269711	0.48936	0.704419	0.51	(0.44 - 0.58)	0.0105973	0.841855	0.918147
SL000440	Protein	HPX	10.1368	10.1463	10.1243	0.51	(0.45 - 0.56)	0.00950621	0.910213	0.960212	0.51	(0.44 - 0.58)	-0.0125111	0.906197	0.954784
SL003301	Protein	CCL23	16.1586	16.1567	16.1906	0.51	(0.46 - 0.56)	-0.00187215	0.96165	0.989159	0.51	(0.44 - 0.57)	0.032062	0.531558	0.703471
SL009213	Protein	CTSA	12.8249	12.835	12.8105	0.51	(0.46 - 0.57)	0.0100946	0.828105	0.915902	0.51	(0.45 - 0.58)	-0.0143625	0.800062	0.896621
SL004673	Protein	CTSS	9.91242	9.91716	9.93705	0.51	(0.46 - 0.56)	0.00474037	0.857038	0.930457	0.51	(0.45 - 0.58)	0.0246278	0.494462	0.67773
SL006108	Protein	CD5L	11.2265	11.2272	11.2832	0.51	(0.46 - 0.56)	0.000666177	0.991961	0.995676	0.51	(0.45 - 0.58)	0.0566933	0.480301	0.669988
SL010463	Protein	GPC2	7.45544	7.4489	7.44786	0.51	(0.46 - 0.57)	-0.00654049	0.888022	0.950335	0.51	(0.45 - 0.58)	-0.00757695	0.888275	0.943472
SL004805	Protein	CADM1	10.8725	10.8905	10.8959	0.51	(0.46 - 0.56)	0.0179966	0.599979	0.790307	0.51	(0.44 - 0.58)	0.0233624	0.598334	0.756875
SL017614	Protein	AKT1 AKT2 AKT3	12.1298	12.1536	12.0878	0.51	(0.46 - 0.57)	0.0238212	0.715234	0.858535	0.51	(0.44 - 0.57)	-0.0420231	0.606237	0.761174
SL004152	Protein	IL18R1	13.4364	13.433	13.4408	0.51	(0.46 - 0.57)	-0.00342204	0.92169	0.96649	0.51	(0.44 - 0.57)	0.00431796	0.919022	0.962297
SL010466	Protein	MFRP	11.0975	11.1093	11.116	0.51	(0.46 - 0.56)	0.0118481	0.778405	0.897414	0.51	(0.44 - 0.58)	0.0185554	0.718277	0.845721
SL007358	Protein	PRKCQ	10.8524	10.8277	10.8349	0.51	(0.45 - 0.56)	-0.024707	0.705887	0.854834	0.51	(0.44 - 0.57)	-0.0174487	0.836856	0.915988
SL010504	Protein	MAPKAPK5	9.35838	9.35953	9.37409	0.51	(0.45 - 0.56)	0.00115617	0.983388	0.993975	0.51	(0.44 - 0.58)	0.0157102	0.817502	0.905208
SL001905	Protein	MSLN	8.71553	8.675	8.64444	0.51	(0.45 - 0.56)	-0.0405268	0.481638	0.698086	0.51	(0.45 - 0.58)	-0.0710933	0.268801	0.478769
SL004353	Protein	IL17D	7.96101	7.9732	7.92565	0.51	(0.46 - 0.56)	0.0121962	0.78481	0.897414	0.51	(0.45 - 0.58)	-0.0353518	0.427703	0.628914
SL006088	Protein	SPHK1	12.6023	12.6524	12.6108	0.51	(0.45 - 0.56)	0.0501123	0.570102	0.770161	0.51	(0.44 - 0.57)	0.00844741	0.936738	0.97301
SL004940	Protein	PTPN6	13.7285	13.7704	13.7712	0.51	(0.46 - 0.57)	0.0418684	0.655835	0.826483	0.51	(0.45 - 0.58)	0.0427129	0.705335	0.83533
SL013989	Protein	RSPO2	8.81288	8.79632	8.80192	0.51	(0.46 - 0.56)	-0.0165593	0.71231	0.857639	0.51	(0.44 - 0.58)	-0.0109595	0.832578	0.913674
SL003310	Protein	VEGFA	9.45237	9.44863	9.43998	0.51	(0.46 - 0.57)	-0.00373227	0.953088	0.985149	0.51	(0.44 - 0.57)	-0.0123899	0.872815	0.936737
SL000313	Protein	C3	10.1241	10.122	10.1148	0.51	(0.45 - 0.56)	-0.00211781	0.979762	0.993609	0.51	(0.44 - 0.58)	-0.00923808	0.932602	0.970503
SL003189	Protein	CCL19	9.23885	9.20248	9.24731	0.51	(0.45 - 0.56)	-0.0363644	0.711307	0.857639	0.51	(0.44 - 0.58)	0.00846428	0.946871	0.978524
SL004915	Protein	CLIC1	12.8133	12.8417	12.8098	0.51	(0.46 - 0.57)	0.0283388	0.747123	0.879887	0.51	(0.44 - 0.57)	-0.00350106	0.974183	0.987052
SL010928	Protein	IMPDH2	11.5309	11.546	11.5529	0.51	(0.46 - 0.57)	0.0150977	0.647793	0.82346	0.51	(0.45 - 0.58)	0.0220607	0.610407	0.762276
SL004910	Protein	ALDOA	16.3816	16.3839	16.3591	0.51	(0.45 - 0.56)	0.00223135	0.950517	0.983093	0.51	(0.45 - 0.58)	-0.0225281	0.609433	0.761792
SL000074	Protein	TP53	10.1043	10.0733	10.0595	0.51	(0.46 - 0.56)	-0.0309909	0.384804	0.619942	0.51	(0.45 - 0.58)	-0.0448124	0.24363	0.447722
SL000498	Protein	LEP	12.6543	12.5916	12.6614	0.51	(0.46 - 0.57)	-0.0627682	0.545503	0.747746	0.51	(0.44 - 0.57)	0.00708571	0.957031	0.982236
CE 20:1	Lipid	CE 20:1	-7.62621	-7.62687	-7.59353	0.5	(0.45 - 0.56)	-0.000660669	0.991322	0.995676	0.51	(0.45 - 0.58)	0.03268	0.669008	0.806505
LPC 17:1	Lipid	LPC 17:1	-6.32749	-6.33368	-6.32995	0.5	(0.45 - 0.56)	-0.00618796	0.905784	0.956726	0.51	(0.44 - 0.57)	-0.00246269	0.971854	0.987039
LPE 20:4	Lipid	LPE 20:4	-2.10776	-2.11656	-2.12609	0.5	(0.45 - 0.56)	-0.00880808	0.849039	0.928121	0.51	(0.44 - 0.57)	-0.0183338	0.764459	0.875889
PC 36:2	Lipid	PC 36:2	0.397843	0.399807	0.394938	0.5	(0.45 - 0.56)	0.00196395	0.900533	0.955341	0.51	(0.44 - 0.57)	-0.00290455	0.888995	0.943472
PI 38:3	Lipid	PI 38:3	-0.811417	-0.824384	-0.83304	0.5	(0.45 - 0.56)	-0.0129672	0.783199	0.897414	0.51	(0.44 - 0.58)	-0.0216227	0.706931	0.836049
SM 31:1	Lipid	SM 31:1	-6.08529	-6.09602	-6.05859	0.5	(0.44 - 0.55)	-0.010733	0.850741	0.92878	0.51	(0.44 - 0.58)	0.0266987	0.721364	0.847629
SL008810	Protein	NEGR1	12.0594	12.0596	12.0665	0.5	(0.45 - 0.55)	0.000255783	0.992451	0.995676	0.51	(0.44 - 0.58)	0.00708312	0.838727	0.917443
SL001796	Protein	MPO	14.2244	14.2415	14.2529	0.5	(0.45 - 0.55)	0.0171553	0.70588	0.854834	0.51	(0.44 - 0.57)	0.0284931	0.619747	0.768859
SL001890	Protein	TACSTD2	8.88492	8.89405	8.89357	0.5	(0.45 - 0.56)	0.00912684	0.845277	0.926497	0.51	(0.44 - 0.57)	0.00865041	0.88932	0.943472
SL003172	Protein	CXCL6	10.7125	10.728	10.6831	0.5	(0.45 - 0.55)	0.0155174	0.826491	0.915314	0.51	(0.44 - 0.58)	-0.029383	0.721739	0.847629
SL004340	Protein	FGF6	8.69892	8.73119	8.69833	0.5	(0.44 - 0.55)	0.0322731	0.513828	0.723577	0.51	(0.44 - 0.57)	-0.00058957	0.992071	0.994768
SL011772	Protein	PES1	7.98996	7.99576	7.97506	0.5	(0.45 - 0.55)	0.00579494	0.905636	0.956726	0.51	(0.44 - 0.57)	-0.0148989	0.80476	0.900692
SL014308	Protein	FGF8	8.82984	8.80765	8.79697	0.5	(0.45 - 0.56)	-0.0221872	0.671188	0.832825	0.51	(0.44 - 0.58)	-0.0328662	0.606009	0.761174
SL007502	Protein	CHST15	12.4537	12.4528	12.4793	0.5	(0.44 - 0.55)	-0.000874555	0.971182	0.990523	0.51	(0.44 - 0.58)	0.0255974	0.422675	0.625499
SL007373	Protein	PPID	13.2818	13.2779	13.253	0.5	(0.45 - 0.55)	-0.00383481	0.969429	0.989581	0.51	(0.45 - 0.58)	-0.0287529	0.814371	0.904809
SL016553	Protein	PDE3A	9.74954	9.7439	9.71777	0.5	(0.45 - 0.56)	-0.00564696	0.870365	0.942292	0.51	(0.45 - 0.58)	-0.0317731	0.431061	0.630623
SL012148	Protein	PEX5	8.08424	8.10755	8.08294	0.5	(0.45 - 0.56)	0.0233129	0.648559	0.82349	0.51	(0.44 - 0.57)	-0.00130295	0.98386	0.993264
SL017328	Protein	MYBPC1	11.149	11.1324	11.1814	0.5	(0.45 - 0.56)	-0.0166566	0.853597	0.928988	0.51	(0.45 - 0.58)	0.0323776	0.771877	0.878716
SL000001	Protein	MUC1	10.352	10.3248	10.2888	0.5	(0.45 - 0.56)	-0.0271856	0.647043	0.82346	0.51	(0.45 - 0.58)	-0.0632281	0.295277	0.501022
AcylCarnitine 18:1	Lipid	AcylCarnitine 18:1	-4.69611	-4.6542	-4.63208	0.49	(0.44 - 0.54)	0.041908	0.413577	0.644474	0.51	(0.44 - 0.58)	0.0640308	0.382317	0.584191
SL004821	Protein	S100A4	10.8589	10.8466	10.8649	0.49	(0.44 - 0.55)	-0.0123656	0.708598	0.856603	0.51	(0.44 - 0.58)	0.00601177	0.883014	0.943472
SL010501	Protein	MAP2K2	10.8705	10.9011	10.902	0.49	(0.44 - 0.54)	0.0306897	0.466053	0.689089	0.51	(0.44 - 0.58)	0.0315156	0.590031	0.752001
SL007217	Protein	IFNGR2	8.81082	8.81122	8.85232	0.49	(0.44 - 0.55)	0.000406922	0.992936	0.995676	0.51	(0.44 - 0.58)	0.0415033	0.555956	0.727218
SL000566	Protein	RBP4	7.97639	7.96436	7.98459	0.48	(0.43 - 0.54)	-0.0120291	0.657057	0.826483	0.51	(0.44 - 0.58)	0.00820013	0.815013	0.904809
SL003744	Protein	LGALS3	14.5109	14.4658	14.5105	0.55	(0.5 - 0.61)	-0.0450988	0.0625531	0.235409	0.5	(0.43 - 0.57)	-0.000404453	0.988695	0.994145
SL000449	Protein	DNAJB1	8.75798	8.84298	8.76538	0.54	(0.49 - 0.59)	0.0850064	0.15219	0.38735	0.5	(0.43 - 0.57)	0.00740011	0.920603	0.963355
SL014091	Protein	SORCS2	9.86703	10.0397	9.9577	0.54	(0.48 - 0.59)	0.172618	0.109708	0.31742	0.5	(0.43 - 0.57)	0.0906703	0.533648	0.705685
SL000021	Protein	INS	7.26141	7.3938	7.30183	0.54	(0.49 - 0.6)	0.132396	0.0389798	0.169801	0.5	(0.43 - 0.57)	0.0404255	0.60856	0.761792
Cer(d19:1/23:0)	Lipid	Cer(d19:1/23:0)	-6.46191	-6.54009	-6.47146	0.53	(0.47 - 0.58)	-0.0781772	0.238068	0.485911	0.5	(0.43 - 0.56)	-0.0095499	0.904541	0.953634
PS 36:1	Lipid	PS 36:1	-4.55353	-4.48427	-4.56051	0.53	(0.47 - 0.58)	0.0692602	0.373618	0.609214	0.5	(0.43 - 0.57)	-0.00698389	0.941779	0.977003
S1P (d18:2)	Lipid	S1P (d18:2)	-6.76709	-6.802	-6.77714	0.53	(0.47 - 0.58)	-0.0349135	0.305842	0.554585	0.5	(0.43 - 0.57)	-0.0100538	0.82008	0.905675
SL004751	Protein	HMOX2	8.68296	8.74068	8.67059	0.53	(0.48 - 0.58)	0.0577211	0.195612	0.44078	0.5	(0.44 - 0.57)	-0.0123632	0.799272	0.89633
SL003800	Protein	KLK4	8.27859	8.28202	8.28201	0.53	(0.48 - 0.58)	0.00343529	0.901992	0.955423	0.5	(0.43 - 0.56)	0.00342269	0.916879	0.961054
SL007531	Protein	BMPER	8.97225	8.94642	8.96564	0.53	(0.48 - 0.58)	-0.025835	0.514984	0.723577	0.5	(0.44 - 0.57)	-0.00661782	0.888592	0.943472
SL006913	Protein	FYN	10.6877	10.7186	10.6605	0.53	(0.47 - 0.58)	0.0308784	0.732131	0.868009	0.5	(0.43 - 0.57)	-0.0271837	0.808851	0.903475
SL016554	Protein	PDE9A	9.19687	9.18355	9.20103	0.53	(0.47 - 0.58)	-0.0133171	0.816647	0.914261	0.5	(0.43 - 0.56)	0.0041568	0.950717	0.979702
SL011404	Protein	PDE4D	10.7986	10.8271	10.7686	0.53	(0.48 - 0.58)	0.0284584	0.515146	0.723577	0.5	(0.43 - 0.57)	-0.0300476	0.52269	0.695
SL010384	Protein	SPOCK1	11.5727	11.6082	11.5806	0.53	(0.48 - 0.58)	0.0354675	0.25736	0.505384	0.5	(0.43 - 0.57)	0.00787916	0.839897	0.917887
SL018947	Protein	USP25	10.0019	9.99251	10.0636	0.53	(0.48 - 0.58)	-0.0094098	0.848618	0.928121	0.5	(0.43 - 0.57)	0.0616523	0.355916	0.559012
PeakE.A	Echo Imaging	Peak E/A	1.10889	1.0814	1.15221	0.52	(0.47 - 0.57)	-0.0274818	0.603721	0.792149	0.5	(0.43 - 0.57)	0.0433217	0.542615	0.713634
Cer(d16:1/23:0)	Lipid	Cer(d16:1/23:0)	-6.96108	-7.04976	-7.0154	0.52	(0.47 - 0.58)	-0.0886807	0.239528	0.487998	0.5	(0.43 - 0.57)	-0.054318	0.586247	0.750354
PE(P-17:0/22:6)	Lipid	PE(P-17:0/22:6)	-4.98081	-4.95648	-4.99149	0.52	(0.46 - 0.57)	0.0243253	0.65638	0.826483	0.5	(0.43 - 0.57)	-0.0106773	0.871878	0.936728
TG 52:4	Lipid	TG 52:4	1.32317	1.28561	1.28355	0.52	(0.46 - 0.57)	-0.0375637	0.554507	0.756349	0.5	(0.43 - 0.56)	-0.0396218	0.621559	0.770113
SL003951	Protein	BDNF	9.87574	9.9054	9.87247	0.52	(0.47 - 0.57)	0.0296672	0.480605	0.697187	0.5	(0.44 - 0.57)	-0.00326712	0.948416	0.978524
SL003648	Protein	GDI2	14.5213	14.5463	14.5125	0.52	(0.46 - 0.57)	0.0250107	0.594243	0.787393	0.5	(0.44 - 0.57)	-0.00880228	0.882325	0.943472
SL000337	Protein	CAPN1 CAPNS1	15.6385	15.6696	15.6209	0.52	(0.47 - 0.57)	0.0311484	0.529957	0.733189	0.5	(0.44 - 0.57)	-0.0175784	0.766119	0.876602
SL005165	Protein	LGALS4	9.37511	9.35442	9.36677	0.52	(0.47 - 0.57)	-0.0206855	0.450252	0.676981	0.5	(0.43 - 0.56)	-0.00833533	0.802032	0.898234
SL001795	Protein	IL1B	11.2935	11.2078	11.2097	0.52	(0.46 - 0.57)	-0.0857057	0.0984693	0.30611	0.5	(0.43 - 0.56)	-0.0837766	0.148904	0.323454
SL010374	Protein	METAP1	9.66448	9.70546	9.66339	0.52	(0.46 - 0.57)	0.0409846	0.594505	0.787393	0.5	(0.43 - 0.57)	-0.00108522	0.990897	0.994428
SL007121	Protein	CTSE	8.85898	8.94521	8.94459	0.52	(0.47 - 0.57)	0.0862321	0.225339	0.473071	0.5	(0.43 - 0.57)	0.0856079	0.424413	0.625685
SL000461	Protein	IGHE IGK@ IGL@	11.3799	11.1585	11.3433	0.52	(0.47 - 0.58)	-0.22142	0.307173	0.555806	0.5	(0.43 - 0.57)	-0.0366212	0.894359	0.946442
SL003655	Protein	TKT	15.6517	15.6736	15.6379	0.52	(0.46 - 0.57)	0.021977	0.657429	0.826483	0.5	(0.44 - 0.57)	-0.0137203	0.822012	0.905675
SL009045	Protein	ENPP7	12.6755	12.7095	12.6625	0.52	(0.46 - 0.57)	0.0339172	0.685254	0.840406	0.5	(0.43 - 0.57)	-0.0130489	0.903664	0.953304
SL010830	Protein	EPB41	12.9611	13.0005	12.9582	0.52	(0.47 - 0.58)	0.0394415	0.495392	0.706508	0.5	(0.44 - 0.57)	-0.00287265	0.968273	0.985774
SL000022	Protein	FGA FGB FGG	13.7943	13.7775	13.8016	0.52	(0.47 - 0.58)	-0.0168218	0.387468	0.622067	0.5	(0.44 - 0.57)	0.00728326	0.788108	0.892098
SL004690	Protein	WISP3	10.9565	10.9976	10.9647	0.52	(0.47 - 0.57)	0.0411141	0.32147	0.56415	0.5	(0.43 - 0.57)	0.00821314	0.845897	0.921706
SL009948	Protein	PLXNB2	12.2123	12.2024	12.222	0.52	(0.47 - 0.57)	-0.00987655	0.701291	0.852345	0.5	(0.43 - 0.56)	0.00978091	0.759851	0.873997
PC(O-35:4)	Lipid	PC(O-35:4)	-1.28481	-1.29	-1.28449	0.51	(0.46 - 0.57)	-0.00519296	0.794562	0.903114	0.5	(0.43 - 0.57)	0.000318835	0.990027	0.994145
SM 32:2	Lipid	SM 32:2	-4.59252	-4.62726	-4.59716	0.51	(0.46 - 0.57)	-0.0347392	0.492246	0.705461	0.5	(0.44 - 0.57)	-0.00464257	0.942532	0.977003
SM 33:0	Lipid	SM 33:0	-8.16874	-8.18265	-8.15991	0.51	(0.46 - 0.57)	-0.0139059	0.784753	0.897414	0.5	(0.43 - 0.57)	0.00882843	0.892197	0.945737
TG 50:3	Lipid	TG 50:3	0.530429	0.513108	0.523261	0.51	(0.46 - 0.56)	-0.0173209	0.830247	0.916694	0.5	(0.43 - 0.57)	-0.00716734	0.942894	0.977003
TG 52:3	Lipid	TG 52:3	1.73467	1.71878	1.72797	0.51	(0.46 - 0.56)	-0.0158948	0.784554	0.897414	0.5	(0.44 - 0.57)	-0.00669689	0.924686	0.965882
SL004144	Protein	GFRA3	9.7932	9.76696	9.77741	0.51	(0.46 - 0.57)	-0.0262364	0.470929	0.692061	0.5	(0.43 - 0.57)	-0.0157839	0.732514	0.85612
SL000551	Protein	PRKCA	14.6617	14.7401	14.6947	0.51	(0.46 - 0.56)	0.0783946	0.358963	0.594793	0.5	(0.43 - 0.56)	0.0330797	0.751201	0.870146
SL005234	Protein	GDF9	8.9126	8.88957	8.8977	0.51	(0.46 - 0.56)	-0.0230285	0.663507	0.830473	0.5	(0.44 - 0.57)	-0.0148976	0.824121	0.906358
SL017188	Protein	GSK3A GSK3B	13.6259	13.667	13.6464	0.51	(0.45 - 0.56)	0.0410615	0.572455	0.772106	0.5	(0.43 - 0.56)	0.0204422	0.817201	0.905208
SL000271	Protein	AGT	12.2241	12.2104	12.2144	0.51	(0.45 - 0.56)	-0.0137426	0.602271	0.791476	0.5	(0.44 - 0.57)	-0.00973292	0.781932	0.887485
SL004864	Protein	CDH12	9.72666	9.71927	9.73859	0.51	(0.45 - 0.56)	-0.00739511	0.85311	0.928988	0.5	(0.43 - 0.56)	0.0119318	0.821542	0.905675
SL004580	Protein	MSR1	9.84343	9.8573	9.87765	0.51	(0.45 - 0.56)	0.0138715	0.589804	0.784564	0.5	(0.43 - 0.57)	0.0342175	0.407562	0.611161
SL011630	Protein	SEZ6L2	10.6731	10.7232	10.6996	0.51	(0.46 - 0.57)	0.0500987	0.396471	0.630919	0.5	(0.43 - 0.57)	0.0264608	0.722717	0.84764
SL004359	Protein	NTF3	7.81092	7.79845	7.80392	0.51	(0.45 - 0.56)	-0.0124625	0.749704	0.881005	0.5	(0.43 - 0.57)	-0.00699507	0.886489	0.943472
SL003524	Protein	PDIA3	11.6007	11.6074	11.6016	0.51	(0.45 - 0.56)	0.00669997	0.856636	0.930457	0.5	(0.44 - 0.57)	0.000846591	0.985648	0.993289
SL003461	Protein	POMC	8.78514	8.79462	8.83226	0.51	(0.46 - 0.57)	0.00948145	0.8058	0.906659	0.5	(0.44 - 0.57)	0.0471292	0.434278	0.631066
SL014229	Protein	CD83	8.29944	8.31262	8.28133	0.51	(0.46 - 0.56)	0.0131809	0.795552	0.90355	0.5	(0.43 - 0.57)	-0.0181123	0.761256	0.873997
SL005191	Protein	LILRB2	13.3684	13.3731	13.3876	0.51	(0.45 - 0.56)	0.00475883	0.899696	0.95508	0.5	(0.44 - 0.57)	0.019242	0.679537	0.814481
SL004648	Protein	TNFSF14	9.36885	9.32303	9.31726	0.51	(0.46 - 0.57)	-0.0458176	0.407274	0.639871	0.5	(0.44 - 0.57)	-0.0515886	0.427959	0.628914
SL010250	Protein	STIP1	13.2822	13.2976	13.2813	0.51	(0.46 - 0.57)	0.0153683	0.791967	0.901903	0.5	(0.44 - 0.57)	-0.000909166	0.989962	0.994145
SL010524	Protein	WNK3	9.8176	9.8248	9.8182	0.51	(0.46 - 0.57)	0.0071985	0.88137	0.947118	0.5	(0.44 - 0.57)	0.000599521	0.992414	0.994768
SL004837	Protein	INHBA INHBB	9.58528	9.59447	9.58836	0.51	(0.46 - 0.56)	0.00918989	0.849779	0.92833	0.5	(0.43 - 0.57)	0.00307217	0.957244	0.982236
GM1(d18:1/16:0)	Lipid	GM1(d18:1/16:0)	-8.54406	-8.52616	-8.49731	0.5	(0.45 - 0.55)	0.0178974	0.686434	0.840633	0.5	(0.43 - 0.57)	0.0467512	0.416948	0.620284
LPI 20:4	Lipid	LPI 20:4	-7.68368	-7.69419	-7.6909	0.5	(0.44 - 0.55)	-0.0105116	0.791246	0.901903	0.5	(0.43 - 0.57)	-0.00722031	0.888167	0.943472
PC(P-40:5)	Lipid	PC(P-40:5)	-8.04827	-8.02728	-8.02693	0.5	(0.45 - 0.55)	0.0209979	0.662976	0.830473	0.5	(0.44 - 0.57)	0.0213409	0.722751	0.84764
PE 40:6	Lipid	PE 40:6	-0.333602	-0.329815	-0.310026	0.5	(0.45 - 0.56)	0.00378714	0.957826	0.987028	0.5	(0.43 - 0.56)	0.0235761	0.790261	0.893071
PI 37:4	Lipid	PI 37:4	-4.37647	-4.39271	-4.39857	0.5	(0.45 - 0.56)	-0.0162355	0.764459	0.889072	0.5	(0.43 - 0.56)	-0.0220933	0.741371	0.863481
SL007631	Protein	SOST	15.0783	15.0414	15.0434	0.5	(0.45 - 0.56)	-0.0368217	0.526959	0.732971	0.5	(0.43 - 0.57)	-0.034868	0.625678	0.773476
SL001947	Protein	MIA	11.7347	11.7356	11.7332	0.5	(0.44 - 0.55)	0.00091211	0.977477	0.993609	0.5	(0.43 - 0.56)	-0.00152186	0.970848	0.98661
SL004718	Protein	KPNA2	7.9721	7.9629	7.94915	0.5	(0.45 - 0.56)	-0.00920547	0.81783	0.914261	0.5	(0.44 - 0.57)	-0.0229504	0.61739	0.767198
SL006918	Protein	MAPK1	13.1216	13.1206	13.1219	0.5	(0.44 - 0.55)	-0.000937552	0.990323	0.995676	0.5	(0.43 - 0.57)	0.000357181	0.997059	0.997649
SL008623	Protein	CNTN2	9.7231	9.73006	9.72626	0.5	(0.44 - 0.55)	0.00696012	0.881311	0.947118	0.5	(0.43 - 0.57)	0.00316178	0.954973	0.981937
SL010509	Protein	PAK6	13.689	13.6889	13.6986	0.5	(0.45 - 0.56)	-0.000109002	0.999035	0.999623	0.5	(0.43 - 0.56)	0.00958571	0.931425	0.970474
SL006919	Protein	RPS6KA5	7.9218	7.91129	7.91449	0.5	(0.45 - 0.55)	-0.0105143	0.820443	0.914261	0.5	(0.43 - 0.56)	-0.00731156	0.896888	0.948524
SL004901	Protein	P4HB	7.78998	7.78875	7.79954	0.5	(0.44 - 0.55)	-0.00123704	0.965397	0.989581	0.5	(0.43 - 0.57)	0.00955864	0.797211	0.895937
SL000510	Protein	LYZ	16.7277	16.7336	16.729	0.5	(0.45 - 0.55)	0.0058559	0.800211	0.903982	0.5	(0.43 - 0.57)	0.00127463	0.965461	0.985774
SL002036	Protein	FGFR4	10.3914	10.3947	10.3068	0.5	(0.45 - 0.56)	0.00328343	0.966351	0.989581	0.5	(0.44 - 0.57)	-0.0846688	0.307074	0.515347
SL008967	Protein	SIRPA	12.2716	12.1301	12.0513	0.5	(0.45 - 0.56)	-0.141431	0.273547	0.520043	0.5	(0.43 - 0.57)	-0.220274	0.216034	0.417127
SL018946	Protein	UBE2G2	12.7761	12.7977	12.8034	0.5	(0.45 - 0.56)	0.0216147	0.499665	0.709609	0.5	(0.43 - 0.58)	0.0272642	0.566222	0.732707
CE 18:0	Lipid	CE 18:0	-3.71458	-3.69629	-3.70036	0.49	(0.44 - 0.54)	0.0182929	0.732354	0.868009	0.5	(0.44 - 0.57)	0.0142218	0.840763	0.917887
PC(O-38:4)	Lipid	PC(O-38:4)	-5.20267	-5.20622	-5.18845	0.49	(0.44 - 0.55)	-0.00354391	0.936871	0.974958	0.5	(0.44 - 0.57)	0.01422	0.805385	0.900795
SM 41:3	Lipid	SM 41:3	-3.4486	-3.45407	-3.44982	0.49	(0.44 - 0.55)	-0.00546879	0.896515	0.954064	0.5	(0.43 - 0.56)	-0.00121987	0.98226	0.993264
SL004725	Protein	HAT1	8.46637	8.4785	8.50951	0.49	(0.44 - 0.55)	0.012139	0.801039	0.904298	0.5	(0.44 - 0.57)	0.0431443	0.522084	0.695
SL004119	Protein	DDR1	8.44575	8.45178	8.42718	0.49	(0.44 - 0.55)	0.00602856	0.914821	0.96207	0.5	(0.43 - 0.57)	-0.0185735	0.741878	0.863481
SL006091	Protein	NCK1	10.1641	10.149	10.1459	0.49	(0.43 - 0.55)	-0.0150704	0.766686	0.889903	0.5	(0.44 - 0.57)	-0.0181793	0.777686	0.883853
SL000556	Protein	PRKCG	9.22889	9.25893	9.26447	0.49	(0.44 - 0.54)	0.0300453	0.521075	0.728543	0.5	(0.43 - 0.57)	0.0355866	0.559692	0.729282
SL004838	Protein	CD47	9.74513	9.7648	9.72646	0.49	(0.44 - 0.55)	0.019675	0.720565	0.860719	0.5	(0.43 - 0.57)	-0.0186723	0.75546	0.872082
SL008071	Protein	YWHAQ	10.2891	10.2735	10.2572	0.49	(0.44 - 0.55)	-0.0155144	0.622889	0.80397	0.5	(0.43 - 0.56)	-0.0318139	0.35545	0.559012
PC(O-34:2)	Lipid	PC(O-34:2)	-5.18384	-5.24794	-5.2136	0.48	(0.43 - 0.54)	-0.0641014	0.273561	0.520043	0.5	(0.44 - 0.57)	-0.0297574	0.684369	0.817952
PC(O-36:3)	Lipid	PC(O-36:3)	-5.7757	-5.81535	-5.79287	0.48	(0.43 - 0.54)	-0.0396476	0.372416	0.609214	0.5	(0.43 - 0.56)	-0.0171725	0.757631	0.873849
TG 54:5	Lipid	TG 54:5	0.277309	0.186468	0.193197	0.53	(0.48 - 0.58)	-0.0908413	0.247099	0.495371	0.49	(0.42 - 0.55)	-0.0841116	0.406446	0.610573
TG(O-54:3)	Lipid	TG(O-54:3)	-2.66236	-2.74906	-2.71492	0.53	(0.48 - 0.58)	-0.0867009	0.311468	0.558197	0.49	(0.42 - 0.55)	-0.052561	0.607975	0.761792
SL000532	Protein	SPARC	14.1715	14.2557	14.1833	0.53	(0.48 - 0.59)	0.0841982	0.202548	0.448632	0.49	(0.42 - 0.56)	0.0117792	0.884521	0.943472
SL000027	Protein	PTGS2	9.2056	9.18401	9.19052	0.53	(0.48 - 0.58)	-0.0215963	0.690261	0.842876	0.49	(0.42 - 0.55)	-0.0150826	0.815399	0.904809
SL008378	Protein	EIF4EBP2	8.04663	8.07654	8.0562	0.53	(0.47 - 0.58)	0.0299139	0.487818	0.704024	0.49	(0.43 - 0.56)	0.00957081	0.861691	0.930517
SL008331	Protein	PA2G4	11.1783	11.2442	11.1952	0.53	(0.48 - 0.59)	0.0659183	0.318446	0.563012	0.49	(0.42 - 0.55)	0.0168833	0.840318	0.917887
SL014130	Protein	CHST6	8.36387	8.3401	8.35015	0.53	(0.47 - 0.58)	-0.0237717	0.397621	0.630967	0.49	(0.42 - 0.56)	-0.0137235	0.689232	0.82202
SL000563	Protein	CCL5	15.5099	15.5883	15.5136	0.53	(0.47 - 0.58)	0.078383	0.267476	0.515433	0.49	(0.43 - 0.56)	0.00364783	0.968859	0.985774
Cer(m18:2/23:0)	Lipid	Cer(m18:2/23:0)	-2.97349	-2.99452	-2.9326	0.52	(0.46 - 0.57)	-0.0210361	0.669968	0.832652	0.49	(0.42 - 0.55)	0.040883	0.517844	0.693467
PE(P-16:0/22:5)	Lipid	PE(P-16:0/22:5)	-3.24	-3.2745	-3.20413	0.52	(0.46 - 0.57)	-0.0345063	0.545545	0.747746	0.49	(0.42 - 0.56)	0.0358661	0.615507	0.766373
SM 34:2	Lipid	SM 34:2	-0.246217	-0.269581	-0.226713	0.52	(0.47 - 0.57)	-0.0233645	0.556024	0.757197	0.49	(0.42 - 0.56)	0.0195034	0.706112	0.835665
SL002783	Protein	CTF1	9.44975	9.46008	9.45334	0.52	(0.46 - 0.57)	0.0103248	0.609855	0.794726	0.49	(0.42 - 0.56)	0.00359041	0.887804	0.943472
SL004687	Protein	TSLP	8.65314	8.66361	8.65335	0.52	(0.47 - 0.57)	0.0104723	0.764363	0.889072	0.49	(0.42 - 0.55)	0.00020792	0.995955	0.997649
SL000615	Protein	VIP	8.58707	8.59604	8.5788	0.52	(0.46 - 0.57)	0.00896677	0.833257	0.917995	0.49	(0.42 - 0.56)	-0.0082716	0.868784	0.933998
SL004351	Protein	IL25	8.28634	8.26158	8.22103	0.52	(0.47 - 0.57)	-0.0247661	0.590132	0.784564	0.49	(0.42 - 0.56)	-0.0653168	0.194481	0.384473
SL007869	Protein	PPIB	11.7398	11.6808	11.6818	0.52	(0.47 - 0.57)	-0.0590429	0.136785	0.362329	0.49	(0.42 - 0.56)	-0.0580123	0.191623	0.38118
SL000357	Protein	F9	13.4851	13.4796	13.4224	0.52	(0.47 - 0.57)	-0.00542213	0.819128	0.914261	0.49	(0.42 - 0.56)	-0.0626764	0.0837868	0.222291
SL006522	Protein	LGALS3BP	10.0397	10.0881	10.03	0.52	(0.47 - 0.58)	0.0484583	0.275317	0.522475	0.49	(0.43 - 0.56)	-0.00972647	0.856279	0.928381
SL002646	Protein	MMP14	9.96914	9.96758	9.9417	0.52	(0.47 - 0.57)	-0.00156761	0.981829	0.993609	0.49	(0.42 - 0.55)	-0.0274397	0.731749	0.85612
Hex2Cer(d16:1/16:0)	Lipid	Hex2Cer(d16:1/16:0)	-7.24537	-7.25072	-7.21802	0.51	(0.45 - 0.56)	-0.00534633	0.914765	0.96207	0.49	(0.42 - 0.56)	0.0273562	0.675034	0.810499
LPC 14:0	Lipid	LPC 14:0	-3.73643	-3.72276	-3.71886	0.51	(0.46 - 0.56)	0.0136676	0.806936	0.907334	0.49	(0.42 - 0.56)	0.017571	0.815064	0.904809
PC 40:10	Lipid	PC 40:10	-13.6009	-13.4469	-13.4069	0.51	(0.45 - 0.56)	0.15404	0.301735	0.551278	0.49	(0.42 - 0.56)	0.193975	0.332446	0.538671
SL004139	Protein	EFNA3	10.9651	10.9724	10.9935	0.51	(0.46 - 0.57)	0.00730308	0.825649	0.915314	0.49	(0.43 - 0.56)	0.02843	0.500933	0.683826
SL000584	Protein	TGFB1	10.5123	10.5281	10.5379	0.51	(0.46 - 0.56)	0.015824	0.69395	0.84628	0.49	(0.43 - 0.56)	0.0256036	0.662263	0.802583
SL004326	Protein	TNFSF18	9.25653	9.25898	9.24873	0.51	(0.45 - 0.56)	0.00244606	0.918653	0.9649	0.49	(0.42 - 0.56)	-0.00780151	0.792207	0.894342
SL008023	Protein	HAPLN1	10.1667	10.2228	10.2232	0.51	(0.46 - 0.57)	0.0560962	0.181981	0.429239	0.49	(0.42 - 0.56)	0.0565566	0.376403	0.58055
SL006917	Protein	LYN	11.8201	11.8739	11.8183	0.51	(0.46 - 0.57)	0.0538047	0.597018	0.787635	0.49	(0.43 - 0.56)	-0.00174922	0.988284	0.994145
SL004845	Protein	EPHB4	11.7892	11.794	11.7885	0.51	(0.46 - 0.56)	0.00480123	0.81679	0.914261	0.49	(0.43 - 0.56)	-0.000701359	0.979696	0.991429
SL005630	Protein	PSMA6	9.82301	9.84168	9.82969	0.51	(0.46 - 0.57)	0.0186741	0.706977	0.855255	0.49	(0.43 - 0.56)	0.00667912	0.912317	0.959437
SL000560	Protein	SELP	14.243	14.2531	14.2545	0.51	(0.46 - 0.56)	0.0100583	0.77369	0.894166	0.49	(0.42 - 0.56)	0.0115269	0.790358	0.893071
SL000139	Protein	EREG	9.79621	9.81282	9.75305	0.51	(0.45 - 0.56)	0.0166015	0.790103	0.901603	0.49	(0.43 - 0.56)	-0.0431677	0.479517	0.66996
Cer(m18:2/20:0)	Lipid	Cer(m18:2/20:0)	-5.62808	-5.60918	-5.59777	0.5	(0.44 - 0.55)	0.0188998	0.709946	0.857619	0.49	(0.42 - 0.56)	0.0303095	0.616652	0.766845
PC 34:2	Lipid	PC 34:2	0.623225	0.629459	0.627528	0.5	(0.44 - 0.55)	0.00623402	0.494041	0.70637	0.49	(0.42 - 0.56)	0.00430285	0.698887	0.830605
PE(P-18:1/22:5)	Lipid	PE(P-18:1/22:5)	-5.23192	-5.23614	-5.20855	0.5	(0.44 - 0.55)	-0.00422429	0.926609	0.968442	0.49	(0.42 - 0.56)	0.0233674	0.687955	0.821077
PE(P-20:0/20:4)	Lipid	PE(P-20:0/20:4)	-4.20684	-4.22146	-4.23825	0.5	(0.44 - 0.55)	-0.0146183	0.793275	0.902784	0.49	(0.43 - 0.56)	-0.0314098	0.637659	0.78374
SL004364	Protein	TNFRSF13B	10.1491	10.1733	10.1595	0.5	(0.45 - 0.56)	0.0242723	0.44845	0.676055	0.49	(0.42 - 0.56)	0.0104505	0.824303	0.906358
SL000343	Protein	CTSB	10.8946	10.8931	10.8791	0.5	(0.45 - 0.56)	-0.00154364	0.964853	0.989581	0.49	(0.42 - 0.56)	-0.0155115	0.71552	0.843256
SL000104	Protein	BCL2	10.471	10.4597	10.471	0.5	(0.45 - 0.56)	-0.0113094	0.756351	0.884599	0.49	(0.43 - 0.56)	5.41368e-05	0.999047	0.999047
SL004919	Protein	PRDX1	11.5278	11.516	11.4925	0.5	(0.45 - 0.55)	-0.0117999	0.82081	0.914261	0.49	(0.42 - 0.55)	-0.0352906	0.586676	0.750354
SL000138	Protein	HBEGF	8.47976	8.42701	8.41685	0.5	(0.45 - 0.56)	-0.0527536	0.21765	0.463763	0.49	(0.43 - 0.56)	-0.0629079	0.180245	0.367872
SL003687	Protein	NME1	9.34185	9.30191	9.29084	0.5	(0.44 - 0.55)	-0.0399461	0.329689	0.571527	0.49	(0.43 - 0.56)	-0.0510113	0.2553	0.463162
LPC 22:4	Lipid	LPC 22:4	-7.93845	-7.94583	-7.95814	0.49	(0.44 - 0.55)	-0.00738589	0.886187	0.950289	0.49	(0.43 - 0.56)	-0.0196966	0.758563	0.873872
PC 34:5	Lipid	PC 34:5	-9.59554	-9.68437	-9.69174	0.49	(0.43 - 0.54)	-0.0888291	0.375047	0.610573	0.49	(0.42 - 0.56)	-0.0962005	0.459013	0.651012
SM 36:3	Lipid	SM 36:3	-6.00305	-5.99971	-5.99649	0.49	(0.44 - 0.55)	0.00333633	0.944143	0.978711	0.49	(0.42 - 0.56)	0.00656202	0.914891	0.961054
SL004589	Protein	AZU1	8.13219	8.16482	8.19798	0.49	(0.44 - 0.55)	0.0326289	0.484682	0.701295	0.49	(0.42 - 0.56)	0.0657859	0.353162	0.558921
SL008421	Protein	ADAMTS1	8.7311	8.69974	8.70115	0.49	(0.44 - 0.54)	-0.0313549	0.43793	0.66736	0.49	(0.43 - 0.56)	-0.0299496	0.52529	0.696813
SL000358	Protein	F7	9.10838	9.10183	9.09314	0.49	(0.43 - 0.54)	-0.00654533	0.85316	0.928988	0.49	(0.42 - 0.56)	-0.0152361	0.740633	0.863481
SL004765	Protein	MAPKAPK3	10.1699	10.1393	10.1097	0.49	(0.44 - 0.55)	-0.0305667	0.6458	0.82346	0.49	(0.42 - 0.55)	-0.060195	0.46286	0.654589
SL014071	Protein	FLRT1	9.9141	9.91847	9.91858	0.49	(0.44 - 0.55)	0.00436639	0.906343	0.956726	0.49	(0.43 - 0.56)	0.00447544	0.921912	0.964129
SL000597	Protein	LTA	8.8916	8.87559	8.87573	0.49	(0.43 - 0.54)	-0.0160182	0.609917	0.794726	0.49	(0.43 - 0.56)	-0.0158738	0.669542	0.806505
SL005177	Protein	IL36A	11.8787	11.953	11.9381	0.48	(0.42 - 0.53)	0.0742387	0.230097	0.477719	0.49	(0.42 - 0.55)	0.0593266	0.473338	0.665468
Hex1Cer(d18:2/22:0)	Lipid	Hex1Cer(d18:2/22:0)	-7.9227	-8.01025	-7.97392	0.54	(0.49 - 0.6)	-0.0875488	0.0854455	0.287738	0.48	(0.41 - 0.54)	-0.0512268	0.418999	0.620603
SL005170	Protein	ICOS	9.57395	9.55584	9.56606	0.54	(0.48 - 0.59)	-0.0181074	0.559853	0.761797	0.48	(0.41 - 0.55)	-0.00789314	0.842088	0.918147
SL004339	Protein	FGF5	9.23604	9.18358	9.21117	0.54	(0.49 - 0.6)	-0.0524588	0.386333	0.621221	0.48	(0.41 - 0.55)	-0.0248726	0.752766	0.870756
SL005225	Protein	NTRK1	11.8312	11.7515	11.7608	0.54	(0.48 - 0.59)	-0.079689	0.105921	0.314047	0.48	(0.41 - 0.54)	-0.0704139	0.222501	0.422976
SL007620	Protein	IL12RB2	10.0517	9.96719	9.97833	0.54	(0.49 - 0.6)	-0.0844832	0.215253	0.462234	0.48	(0.41 - 0.54)	-0.0733486	0.400184	0.604307
SL003930	Protein	HPGD	10.6048	10.6657	10.6342	0.54	(0.48 - 0.59)	0.0608834	0.0381489	0.169217	0.48	(0.41 - 0.55)	0.0293478	0.373498	0.578033
LPC(O-24:1)	Lipid	LPC(O-24:1)	-7.97933	-8.03778	-8.02362	0.53	(0.48 - 0.59)	-0.0584523	0.163304	0.406726	0.48	(0.42 - 0.55)	-0.0442903	0.437069	0.634576
SL000384	Protein	CTLA4	6.84157	6.77538	6.8385	0.53	(0.47 - 0.58)	-0.0661936	0.373819	0.609214	0.48	(0.42 - 0.55)	-0.00307351	0.975956	0.988236
SL011202	Protein	NAPA	13.0727	13.1297	13.1081	0.53	(0.47 - 0.58)	0.0570897	0.359537	0.595121	0.48	(0.42 - 0.55)	0.0354265	0.642879	0.786723
SL005575	Protein	FUT3	8.67253	8.77607	8.77934	0.53	(0.47 - 0.58)	0.103539	0.0757477	0.267484	0.48	(0.42 - 0.55)	0.106817	0.211847	0.411518
SL007310	Protein	RAC3	12.7476	12.8151	12.7828	0.53	(0.48 - 0.59)	0.0675496	0.209208	0.456797	0.48	(0.41 - 0.55)	0.0352259	0.604537	0.76099
TG(O-54:2)	Lipid	TG(O-54:2)	-2.14881	-2.1821	-2.18055	0.52	(0.46 - 0.57)	-0.0332915	0.713089	0.857737	0.48	(0.42 - 0.55)	-0.0317446	0.764388	0.875889
SL000481	Protein	IL5	8.1422	8.10961	8.08359	0.52	(0.46 - 0.57)	-0.0325916	0.473599	0.693572	0.48	(0.41 - 0.54)	-0.058612	0.251961	0.458852
SL000345	Protein	CTSG	9.87676	9.87152	9.87469	0.52	(0.47 - 0.58)	-0.00523705	0.897046	0.954064	0.48	(0.42 - 0.55)	-0.00207105	0.968565	0.985774
SL002640	Protein	PGF	8.48381	8.4326	8.42317	0.52	(0.47 - 0.57)	-0.051207	0.306768	0.555668	0.48	(0.41 - 0.55)	-0.0606369	0.296942	0.502334
LPE 17:0	Lipid	LPE 17:0	-6.71514	-6.70702	-6.69406	0.51	(0.45 - 0.56)	0.0081152	0.877264	0.946405	0.48	(0.41 - 0.55)	0.0210757	0.770511	0.878716
TG 54:6	Lipid	TG 54:6	-0.776134	-0.838045	-0.901926	0.51	(0.46 - 0.57)	-0.0619103	0.56829	0.768452	0.48	(0.41 - 0.55)	-0.125792	0.355568	0.559012
SL010348	Protein	FN1	16.0092	16.0148	15.985	0.51	(0.46 - 0.56)	0.00564974	0.821212	0.914261	0.48	(0.41 - 0.55)	-0.0241279	0.445194	0.639233
SL009988	Protein	ADAM12	8.88454	8.9371	8.87733	0.51	(0.46 - 0.57)	0.0525624	0.122077	0.336557	0.48	(0.41 - 0.55)	-0.00720657	0.819081	0.905328
SL005488	Protein	SPARCL1	13.5956	13.5933	13.6292	0.51	(0.45 - 0.56)	-0.00226279	0.936521	0.974958	0.48	(0.42 - 0.55)	0.0336212	0.356596	0.559561
GM3(d18:1/18:0)	Lipid	GM3(d18:1/18:0)	-7.66683	-7.68702	-7.71844	0.5	(0.44 - 0.55)	-0.0201907	0.660797	0.829063	0.48	(0.41 - 0.55)	-0.0516181	0.388424	0.591385
SM 37:0	Lipid	SM 37:0	-3.98291	-3.97458	-3.95105	0.5	(0.44 - 0.55)	0.00832302	0.821861	0.914381	0.48	(0.42 - 0.55)	0.0318578	0.513262	0.690066
SL010500	Protein	LYN	14.1007	14.1601	14.0914	0.5	(0.45 - 0.56)	0.059384	0.52466	0.732184	0.48	(0.42 - 0.55)	-0.00934821	0.932093	0.970503
SL008072	Protein	COL8A1	9.8833	9.83712	9.90523	0.5	(0.45 - 0.56)	-0.0461781	0.666451	0.8313	0.48	(0.41 - 0.55)	0.0219321	0.868668	0.933998
LPC 18:3	Lipid	LPC 18:3	-6.02503	-5.9813	-5.95022	0.49	(0.44 - 0.54)	0.0437351	0.521619	0.728543	0.48	(0.41 - 0.55)	0.0748111	0.413234	0.615842
PC(P-34:3)	Lipid	PC(P-34:3)	-6.468	-6.45619	-6.44438	0.49	(0.43 - 0.54)	0.0118139	0.477005	0.695919	0.48	(0.41 - 0.54)	0.0236235	0.26767	0.477679
SL004672	Protein	TNFRSF17	13.1098	13.1319	13.149	0.49	(0.43 - 0.54)	0.0221228	0.549648	0.752067	0.48	(0.41 - 0.55)	0.0392342	0.39405	0.598074
SL004348	Protein	IFNL1	8.51801	8.52694	8.5637	0.49	(0.44 - 0.54)	0.00892295	0.803325	0.904476	0.48	(0.41 - 0.55)	0.0456853	0.370244	0.574575
SL000125	Protein	IL1A	9.36477	9.38578	9.41004	0.49	(0.44 - 0.55)	0.0210078	0.678757	0.837358	0.48	(0.42 - 0.55)	0.0452693	0.48696	0.674007
SL014268	Protein	CD200	11.1541	11.1776	11.1791	0.49	(0.44 - 0.54)	0.0235559	0.369371	0.606221	0.48	(0.42 - 0.55)	0.025086	0.433103	0.630708
SL011508	Protein	ADCYAP1	8.69058	8.77375	8.81102	0.49	(0.44 - 0.55)	0.0831707	0.320666	0.563919	0.48	(0.41 - 0.55)	0.120444	0.281032	0.488625
SL000020	Protein	APOB	13.7718	13.8741	13.8822	0.48	(0.43 - 0.53)	0.102278	0.141232	0.369456	0.48	(0.42 - 0.55)	0.110441	0.244076	0.447722
SL007024	Protein	GREM1	8.75606	8.74945	8.74899	0.48	(0.42 - 0.53)	-0.00660487	0.876377	0.946375	0.48	(0.41 - 0.54)	-0.0070736	0.901513	0.952218
SL003916	Protein	KLK12	12.3358	12.2871	12.3035	0.54	(0.48 - 0.59)	-0.0487137	0.229799	0.477719	0.47	(0.41 - 0.54)	-0.0323177	0.520452	0.694733
SL011405	Protein	PDE5A	12.7365	12.8833	12.8444	0.54	(0.49 - 0.59)	0.146762	0.0945376	0.30076	0.47	(0.4 - 0.54)	0.107878	0.321914	0.528189
TG 54:2	Lipid	TG 54:2	0.473905	0.413427	0.391277	0.53	(0.47 - 0.58)	-0.0604774	0.384511	0.619942	0.47	(0.4 - 0.54)	-0.0826278	0.333529	0.538973
SL008157	Protein	UBE2L3	10.724	10.7773	10.7817	0.53	(0.47 - 0.58)	0.0533276	0.341058	0.575813	0.47	(0.4 - 0.54)	0.0577002	0.407476	0.611161
SL011709	Protein	PDXP	11.7532	11.8145	11.8217	0.53	(0.48 - 0.58)	0.0613121	0.30928	0.557187	0.47	(0.4 - 0.54)	0.0684982	0.361311	0.565385
SL006675	Protein	CKAP2	14.0002	14.0469	14.0372	0.53	(0.48 - 0.58)	0.0466332	0.106718	0.315303	0.47	(0.4 - 0.54)	0.0370062	0.285618	0.494058
SM 38:3	Lipid	SM 38:3	-0.555639	-0.538238	-0.588796	0.52	(0.47 - 0.58)	0.0174003	0.459845	0.684677	0.47	(0.41 - 0.54)	-0.0331571	0.25662	0.463757
SL005166	Protein	LGALS7	9.47958	9.51046	9.5183	0.52	(0.47 - 0.58)	0.0308872	0.296279	0.546103	0.47	(0.41 - 0.54)	0.0387183	0.336395	0.541952
SL004180	Protein	TNFRSF8	10.0197	10.0442	10.0743	0.5	(0.45 - 0.56)	0.024449	0.497602	0.708464	0.47	(0.41 - 0.54)	0.0545781	0.255594	0.463162
SL008728	Protein	NRXN3	9.83553	9.83556	9.87482	0.5	(0.45 - 0.56)	2.1356e-05	0.999623	0.999623	0.47	(0.4 - 0.53)	0.0392855	0.443068	0.63864				*
CE 18:3	Lipid	CE 18:3	-1.00446	-0.978596	-0.920673	0.49	(0.44 - 0.54)	0.025863	0.677532	0.837215	0.47	(0.4 - 0.54)	0.0837863	0.288962	0.496791
Hex1Cer(d18:1/22:0)	Lipid	Hex1Cer(d18:1/22:0)	-3.57885	-3.56247	-3.5263	0.49	(0.43 - 0.54)	0.0163842	0.732415	0.868009	0.47	(0.4 - 0.54)	0.0525583	0.400899	0.604347
PC(P-38:6)	Lipid	PC(P-38:6)	-6.51637	-6.53509	-6.56165	0.49	(0.44 - 0.55)	-0.0187197	0.712097	0.857639	0.47	(0.41 - 0.54)	-0.045282	0.481754	0.670094
PE(P-16:0/22:6)	Lipid	PE(P-16:0/22:6)	-1.76309	-1.7996	-1.82837	0.49	(0.44 - 0.54)	-0.0365043	0.477973	0.695919	0.47	(0.41 - 0.54)	-0.0652809	0.304301	0.51171
SL010375	Protein	ASAH2	11.7034	11.6624	11.6181	0.49	(0.44 - 0.55)	-0.040931	0.467753	0.689793	0.47	(0.4 - 0.53)	-0.0853053	0.211284	0.410897
SL007756	Protein	GDF2	11.1073	11.1501	11.1746	0.49	(0.44 - 0.54)	0.0427433	0.246005	0.494227	0.47	(0.4 - 0.54)	0.067294	0.179167	0.367021
SL004415	Protein	ACE2	9.20446	9.16094	9.16197	0.48	(0.43 - 0.54)	-0.0435241	0.208355	0.456725	0.47	(0.4 - 0.54)	-0.0424888	0.316032	0.521214
SL000470	Protein	IL11	8.33712	8.28186	8.22641	0.49	(0.43 - 0.54)	-0.0552595	0.212876	0.458294	0.46	(0.39 - 0.52)	-0.110705	0.00976037	0.048694		*
SL004670	Protein	ARTN	8.96746	9.00787	8.98531	0.48	(0.43 - 0.54)	0.0404087	0.369472	0.606221	0.46	(0.4 - 0.53)	0.0178561	0.753749	0.871297
SL010502	Protein	MAPK8	10.305	10.3549	10.4025	0.48	(0.42 - 0.53)	0.0499399	0.516149	0.723894	0.46	(0.39 - 0.52)	0.0975257	0.292163	0.499597
Hex1Cer(d18:1/16:1)	Lipid	Hex1Cer(d18:1/16:1)	-7.81868	-7.71632	-7.68445	0.47	(0.41 - 0.52)	0.102365	0.102971	0.312425	0.46	(0.39 - 0.52)	0.134235	0.0817199	0.218711
SL008611	Protein	NAAA	12.5924	12.4967	12.5014	0.55	(0.5 - 0.6)	-0.0956169	0.161503	0.405558	0.45	(0.39 - 0.52)	-0.0909889	0.285508	0.494058

## Sheet: SuppTable3
Data feature A	Data feature B	Data type A	Data type B	Interaction Type	direction	Regularized Partial Correlation
LVESVi	LVEDVi	Echo Imaging	Echo Imaging	Within	1	0.475028
LVIDSi	LVIDDi	Echo Imaging	Echo Imaging	Within	1	0.459345
NT-proBNP	BNP	Clinical Biomarker	Clinical Biomarker	Within	1	0.386585
LVESVi	LVEF	Echo Imaging	Echo Imaging	Within	-1	-0.374747
LVMi	PWT	Echo Imaging	Echo Imaging	Within	1	0.353708
e'/a'	e'	Echo Imaging	Echo Imaging	Within	1	0.34217
e'/a'	a'	Echo Imaging	Echo Imaging	Within	-1	-0.331722
E/e'	e'	Echo Imaging	Echo Imaging	Within	-1	-0.304256
PWT	IVS	Echo Imaging	Echo Imaging	Within	1	0.266368
LVMi	IVS	Echo Imaging	Echo Imaging	Within	1	0.262172
s'	a'	Echo Imaging	Echo Imaging	Within	1	0.25615
LA area	LA width	Echo Imaging	Echo Imaging	Within	1	0.242805
NT-proANP	ANP	Clinical Biomarker	Clinical Biomarker	Within	1	0.208941
TNNT2	TNI	Protein	Clinical Biomarker	Between	1	0.206118
BNP	ANP	Clinical Biomarker	Clinical Biomarker	Within	1	0.205242
e'/a'	Peak E/A	Echo Imaging	Echo Imaging	Within	1	0.200349
s'	e'	Echo Imaging	Echo Imaging	Within	1	0.180502
NT-proBNP	NT-proANP	Clinical Biomarker	Clinical Biomarker	Within	1	0.180317
LVIDDi	LVMi	Echo Imaging	Echo Imaging	Within	1	0.17475
LVIDSi	LVEF	Echo Imaging	Echo Imaging	Within	-1	-0.157244
IGFBP6	Creatinine	Protein	Clinical Biomarker	Between	1	0.141619
LVIDDi	IVS	Echo Imaging	Echo Imaging	Within	-1	-0.137651
NT-proBNP	ANP	Clinical Biomarker	Clinical Biomarker	Within	1	0.136736
LVESVi	LVIDSi	Echo Imaging	Echo Imaging	Within	1	0.134958
Peak S/D	DT	Echo Imaging	Echo Imaging	Within	1	0.132729
Peak E/A	Peak S/D	Echo Imaging	Echo Imaging	Within	-1	-0.132704
CD59	Creatinine	Protein	Clinical Biomarker	Between	1	0.118415
CST6	Creatinine	Protein	Clinical Biomarker	Between	1	0.115028
BNP	NT-proANP	Clinical Biomarker	Clinical Biomarker	Within	1	0.113327
BNP	TNI	Clinical Biomarker	Clinical Biomarker	Within	1	0.102334
Peak E/A	DT	Echo Imaging	Echo Imaging	Within	-1	-0.0925046
LVEDVi	LVIDSi	Echo Imaging	Echo Imaging	Within	1	0.0861715
E/e'	a'	Echo Imaging	Echo Imaging	Within	-1	-0.0856395
LVMi	LA area	Echo Imaging	Echo Imaging	Within	1	0.0816034
LVEDVi	LVMi	Echo Imaging	Echo Imaging	Within	1	0.0686418
CDNF	Creatinine	Protein	Clinical Biomarker	Between	1	0.0671971
POSTN	ANP	Protein	Clinical Biomarker	Between	1	0.0667657
Peak S/D	a'	Echo Imaging	Echo Imaging	Within	1	0.0657352
DSC2	Creatinine	Protein	Clinical Biomarker	Between	1	0.0624287
NT-proBNP	TNI	Clinical Biomarker	Clinical Biomarker	Within	1	0.0615491
EFEMP1	NT-proANP	Protein	Clinical Biomarker	Between	1	0.0615221
e'/a'	Peak S/D	Echo Imaging	Echo Imaging	Within	-1	-0.0607238
CST3	Creatinine	Protein	Clinical Biomarker	Between	1	0.058872
ADAMTS13	NT-proANP	Protein	Clinical Biomarker	Between	-1	-0.0584368
NT-proBNP	E/e'	Clinical Biomarker	Echo Imaging	Within	1	0.0575285
EFNB1	Creatinine	Protein	Clinical Biomarker	Between	1	0.0573654
NT-proBNP	s'	Clinical Biomarker	Echo Imaging	Within	-1	-0.0565785
s'	LVEF	Echo Imaging	Echo Imaging	Within	1	0.0557061
E/e'	s'	Echo Imaging	Echo Imaging	Within	-1	-0.0535069
ESAM	Creatinine	Protein	Clinical Biomarker	Between	1	0.0533746
BNP	LVEF	Clinical Biomarker	Echo Imaging	Within	-1	-0.052682
ROBO2	Peak E/A	Protein	Echo Imaging	Between	1	0.0510333
BNP	a'	Clinical Biomarker	Echo Imaging	Within	-1	-0.0495588
NT-proBNP	LVEF	Clinical Biomarker	Echo Imaging	Within	-1	-0.0492705
RELT	Creatinine	Protein	Clinical Biomarker	Between	1	0.0491591
LVEDVi	LVIDDi	Echo Imaging	Echo Imaging	Within	1	0.0482343
GPC3	Creatinine	Protein	Clinical Biomarker	Between	-1	-0.047954
SHBG	Creatinine	Protein	Clinical Biomarker	Between	-1	-0.0472689
IDS	Creatinine	Protein	Clinical Biomarker	Between	-1	-0.0472613
HDGFRP2	LA area	Protein	Echo Imaging	Between	1	0.0472597
AMH	Creatinine	Protein	Clinical Biomarker	Between	-1	-0.0468247
ROBO2	a'	Protein	Echo Imaging	Between	-1	-0.0459042
CST3	NT-proANP	Protein	Clinical Biomarker	Between	1	0.0443682
AcylCarnitine 13:0	Creatinine	Lipid	Clinical Biomarker	Between	1	0.0443361
e'/a'	DT	Echo Imaging	Echo Imaging	Within	-1	-0.0443267
s'	LVIDSi	Echo Imaging	Echo Imaging	Within	-1	-0.0437001
KLK3	LVEDVi	Protein	Echo Imaging	Between	1	0.0428255
Peak S/D	LA area	Echo Imaging	Echo Imaging	Within	-1	-0.0426966
LVIDDi	PWT	Echo Imaging	Echo Imaging	Within	-1	-0.0421216
CFD	Creatinine	Protein	Clinical Biomarker	Between	1	0.0416729
KDR	NT-proANP	Protein	Clinical Biomarker	Between	-1	-0.0410137
BNP	LVIDSi	Clinical Biomarker	Echo Imaging	Within	1	0.0407183
s'	LVIDDi	Echo Imaging	Echo Imaging	Within	-1	-0.0405747
PSMA2	IVS	Protein	Echo Imaging	Between	1	0.0403266
NT-proBNP	LVIDSi	Clinical Biomarker	Echo Imaging	Within	1	0.0401957
Peak E/A	a'	Echo Imaging	Echo Imaging	Within	-1	-0.0395093
ADIPOQ	NT-proANP	Protein	Clinical Biomarker	Between	1	0.0393432
ANGPT2	NT-proBNP	Protein	Clinical Biomarker	Between	1	0.0384052
ANP	LVIDSi	Clinical Biomarker	Echo Imaging	Within	1	0.0382721
ANGPT2	Peak S/D	Protein	Echo Imaging	Between	-1	-0.0380586
FIGF	NT-proANP	Protein	Clinical Biomarker	Between	1	0.0371459
B2M	Creatinine	Protein	Clinical Biomarker	Between	1	0.0362369
CDH6	NT-proANP	Protein	Clinical Biomarker	Between	-1	-0.0362121
NT-proBNP	LA area	Clinical Biomarker	Echo Imaging	Within	1	0.035273
JAM3	Creatinine	Protein	Clinical Biomarker	Between	1	0.0352581
LVMi	LA width	Echo Imaging	Echo Imaging	Within	1	0.0351779
CKB CKM	NT-proBNP	Protein	Clinical Biomarker	Between	-1	-0.0347594
RET	NT-proANP	Protein	Clinical Biomarker	Between	-1	-0.0346309
KDR	e'	Protein	Echo Imaging	Between	1	0.0342624
BNP	Peak S/D	Clinical Biomarker	Echo Imaging	Within	-1	-0.0341984
ALCAM	Creatinine	Protein	Clinical Biomarker	Between	-1	-0.0339641
AGER	a'	Protein	Echo Imaging	Between	-1	-0.0338081
POSTN	BNP	Protein	Clinical Biomarker	Between	1	0.0337987
ANGPT2	BNP	Protein	Clinical Biomarker	Between	1	0.0336353
CSF2	Peak AR	Protein	Echo Imaging	Between	-1	-0.0334311
IGFBP2	NT-proANP	Protein	Clinical Biomarker	Between	1	0.0329517
e'	DT	Echo Imaging	Echo Imaging	Within	-1	-0.0326758
BNP	E/e'	Clinical Biomarker	Echo Imaging	Within	1	0.0320668
THBS2	E/e'	Protein	Echo Imaging	Between	1	0.0320353
NBL1	Creatinine	Protein	Clinical Biomarker	Between	1	0.0317226
BMP1	NT-proANP	Protein	Clinical Biomarker	Between	-1	-0.0316886
RSPO4	ANP	Protein	Clinical Biomarker	Between	1	0.0315674
PRSS2	Creatinine	Protein	Clinical Biomarker	Between	1	0.0314948
RSPO4	NT-proBNP	Protein	Clinical Biomarker	Between	1	0.0312094
ANG	Creatinine	Protein	Clinical Biomarker	Between	1	0.0311734
AGT	LVESVi	Protein	Echo Imaging	Between	-1	-0.0311444
IGFBP1	LVIDDi	Protein	Echo Imaging	Between	1	0.0310013
RSPO4	BNP	Protein	Clinical Biomarker	Between	1	0.0309716
EGFR	NT-proBNP	Protein	Clinical Biomarker	Between	-1	-0.0308564
ANP	LA area	Clinical Biomarker	Echo Imaging	Within	1	0.0304971
AFP	Creatinine	Protein	Clinical Biomarker	Between	1	0.0299759
LVIDSi	LVMi	Echo Imaging	Echo Imaging	Within	1	0.0297018
GDF15	NT-proANP	Protein	Clinical Biomarker	Between	1	0.0295071
NT-proANP	LA area	Clinical Biomarker	Echo Imaging	Within	1	0.0293244
ANGPT2	LA area	Protein	Echo Imaging	Between	1	0.0292945
REN	LVESVi	Protein	Echo Imaging	Between	1	0.0284734
THBS2	LA area	Protein	Echo Imaging	Between	1	0.0284088
HIST1H3A	LA width	Protein	Echo Imaging	Between	1	0.0281438
EIF5	TNI	Protein	Clinical Biomarker	Between	1	0.0277352
F10	LA area	Protein	Echo Imaging	Between	-1	-0.0270503
PC(P-36:2)	NT-proBNP	Lipid	Clinical Biomarker	Between	1	0.0269267
IGFBP2	NT-proBNP	Protein	Clinical Biomarker	Between	1	0.0265907
RSPO3	NT-proANP	Protein	Clinical Biomarker	Between	1	0.0262631
ROBO2	s'	Protein	Echo Imaging	Between	-1	-0.026229
STC1	LVEF	Protein	Echo Imaging	Between	-1	-0.0258931
CD93	Peak E/A	Protein	Echo Imaging	Between	1	0.0257
F10	LA area	Protein	Echo Imaging	Between	-1	-0.0254411
MAP2K2	Creatinine	Protein	Clinical Biomarker	Between	1	0.0253365
TIE1	NT-proANP	Protein	Clinical Biomarker	Between	-1	-0.0246855
NT-proANP	E/e'	Clinical Biomarker	Echo Imaging	Within	1	0.0244801
FAP	NT-proBNP	Protein	Clinical Biomarker	Between	-1	-0.0241458
SERPINF2	e'	Protein	Echo Imaging	Between	1	0.0240586
GHR	NT-proANP	Protein	Clinical Biomarker	Between	-1	-0.0239719
REG1A	Creatinine	Protein	Clinical Biomarker	Between	1	0.0238936
PGD	TNI	Protein	Clinical Biomarker	Between	-1	-0.0238632
FSTL1	ANP	Protein	Clinical Biomarker	Between	1	0.0237808
PGD	LVMi	Protein	Echo Imaging	Between	-1	-0.0236202
RPS27A	Creatinine	Protein	Clinical Biomarker	Between	1	0.0234336
S100A6	PWT	Protein	Echo Imaging	Between	-1	-0.0232201
MMP2	Creatinine	Protein	Clinical Biomarker	Between	-1	-0.022836
BMP1	BNP	Protein	Clinical Biomarker	Between	-1	-0.022805
LSAMP	LA area	Protein	Echo Imaging	Between	-1	-0.022741
TNI	LVEF	Clinical Biomarker	Echo Imaging	Within	-1	-0.022691
SECTM1	Creatinine	Protein	Clinical Biomarker	Between	1	0.022681
CAPG	e'	Protein	Echo Imaging	Between	-1	-0.0226594
JAM2	Creatinine	Protein	Clinical Biomarker	Between	1	0.022558
s'	LVESVi	Echo Imaging	Echo Imaging	Within	-1	-0.0222377
ERP29	Creatinine	Protein	Clinical Biomarker	Between	1	0.0222161
RBP4	Creatinine	Protein	Clinical Biomarker	Between	1	0.0221222
TNFRSF19	Creatinine	Protein	Clinical Biomarker	Between	1	0.0219476
CHRDL1	NT-proANP	Protein	Clinical Biomarker	Between	1	0.0218712
LVESVi	LA area	Echo Imaging	Echo Imaging	Within	1	0.0218036
CGA CGB	E/e'	Protein	Echo Imaging	Between	1	0.0217575
CKB CKM	NT-proANP	Protein	Clinical Biomarker	Between	-1	-0.02153
PIANP	NT-proANP	Protein	Clinical Biomarker	Between	1	0.0212771
CCL14	NT-proANP	Protein	Clinical Biomarker	Between	1	0.0211225
GDF15	LVESVi	Protein	Echo Imaging	Between	1	0.0211096
GHR	NT-proBNP	Protein	Clinical Biomarker	Between	-1	-0.0210351
ROBO2	Peak S/D	Protein	Echo Imaging	Between	-1	-0.0209881
FSTL3	NT-proANP	Protein	Clinical Biomarker	Between	1	0.0208366
SFN	Creatinine	Protein	Clinical Biomarker	Between	1	0.0207279
TNI	LVMi	Clinical Biomarker	Echo Imaging	Within	1	0.0201957
SPON1	ANP	Protein	Clinical Biomarker	Between	1	0.0201763
F10	NT-proBNP	Protein	Clinical Biomarker	Between	-1	-0.0198247
NT-proBNP	a'	Clinical Biomarker	Echo Imaging	Within	-1	-0.0196429
BMP10	NT-proANP	Protein	Clinical Biomarker	Between	1	0.0191933
NT-proANP	LVMi	Clinical Biomarker	Echo Imaging	Within	1	0.019148
AcylCarnitine 18:2	LA area	Lipid	Echo Imaging	Between	1	0.019025
SERPINF1	Creatinine	Protein	Clinical Biomarker	Between	1	0.0189338
IGFBP1	NT-proANP	Protein	Clinical Biomarker	Between	1	0.0185838
PGD	IVS	Protein	Echo Imaging	Between	-1	-0.0184434
CFD	NT-proANP	Protein	Clinical Biomarker	Between	1	0.0181609
PC 32:0	s'	Lipid	Echo Imaging	Between	-1	-0.0180962
IL1R2	NT-proANP	Protein	Clinical Biomarker	Between	-1	-0.0180549
LVEDVi	LA area	Echo Imaging	Echo Imaging	Within	1	0.0180281
APOM	LA width	Protein	Echo Imaging	Between	-1	-0.0178978
NT-proANP	LA width	Clinical Biomarker	Echo Imaging	Within	1	0.0178882
HIST2H2BE	IVS	Protein	Echo Imaging	Between	1	0.0177314
BMP1	NT-proBNP	Protein	Clinical Biomarker	Between	-1	-0.0175589
SPON1	NT-proBNP	Protein	Clinical Biomarker	Between	1	0.0174888
RARRES2	Creatinine	Protein	Clinical Biomarker	Between	1	0.0174552
FCN3	NT-proBNP	Protein	Clinical Biomarker	Between	-1	-0.0173109
PTH	NT-proBNP	Protein	Clinical Biomarker	Between	1	0.0171141
ANP	LVMi	Clinical Biomarker	Echo Imaging	Within	1	0.017034
FSTL3	E/e'	Protein	Echo Imaging	Between	1	0.0168286
EFNA4	Creatinine	Protein	Clinical Biomarker	Between	1	0.0168182
LVMi	LVEF	Echo Imaging	Echo Imaging	Within	-1	-0.0167027
FIGF	BNP	Protein	Clinical Biomarker	Between	1	0.0164319
CHRDL1	e'	Protein	Echo Imaging	Between	-1	-0.0162575
CNTN5	Creatinine	Protein	Clinical Biomarker	Between	-1	-0.0160004
CNTN4	Creatinine	Protein	Clinical Biomarker	Between	-1	-0.0158167
PTN	NT-proANP	Protein	Clinical Biomarker	Between	1	0.0158078
CTSV	NT-proANP	Protein	Clinical Biomarker	Between	-1	-0.0154634
MMP2	ANP	Protein	Clinical Biomarker	Between	1	0.0154432
SM 40:0	NT-proBNP	Lipid	Clinical Biomarker	Between	-1	-0.0152242
F10	NT-proANP	Protein	Clinical Biomarker	Between	-1	-0.0152108
CA13	LVMi	Protein	Echo Imaging	Between	-1	-0.0149835
CRP	TNI	Protein	Clinical Biomarker	Between	1	0.01495
BNP	LA area	Clinical Biomarker	Echo Imaging	Within	1	0.0148708
CHRDL1	LVIDDi	Protein	Echo Imaging	Between	1	0.0145265
TIMP1	LA width	Protein	Echo Imaging	Between	1	0.0144576
IL1R2	NT-proBNP	Protein	Clinical Biomarker	Between	-1	-0.0143304
LVIDSi	PWT	Echo Imaging	Echo Imaging	Within	-1	-0.0140153
REN	LVEF	Protein	Echo Imaging	Between	-1	-0.0140115
PTH	E/e'	Protein	Echo Imaging	Between	1	0.0137351
a'	LVIDDi	Echo Imaging	Echo Imaging	Within	-1	-0.0136274
LCN2	Creatinine	Protein	Clinical Biomarker	Between	1	0.0134651
FETUB	NT-proANP	Protein	Clinical Biomarker	Between	-1	-0.0131421
FIGF	NT-proBNP	Protein	Clinical Biomarker	Between	1	0.0129568
TNNT2	LVEF	Protein	Echo Imaging	Between	-1	-0.0129369
FST	Creatinine	Protein	Clinical Biomarker	Between	1	0.0129336
TFF3	NT-proANP	Protein	Clinical Biomarker	Between	1	0.0126992
SM 37:0	LVIDDi	Lipid	Echo Imaging	Between	1	0.0126367
NT-proBNP	LVIDDi	Clinical Biomarker	Echo Imaging	Within	1	0.0124755
RET	LVIDDi	Protein	Echo Imaging	Between	-1	-0.0123528
ANGPT2	ANP	Protein	Clinical Biomarker	Between	1	0.0121473
THBS2	NT-proBNP	Protein	Clinical Biomarker	Between	1	0.0119687
LA width	IVS	Echo Imaging	Echo Imaging	Within	1	0.0119367
CST1	Creatinine	Protein	Clinical Biomarker	Between	1	0.0119082
FSTL3	LVMi	Protein	Echo Imaging	Between	1	0.0118583
ASAH2	NT-proBNP	Protein	Clinical Biomarker	Between	-1	-0.0117826
IGFBP4	Creatinine	Protein	Clinical Biomarker	Between	1	0.0117541
UNC5D	Peak S/D	Protein	Echo Imaging	Between	1	0.0116388
CD4	Creatinine	Protein	Clinical Biomarker	Between	1	0.0116343
CA13	LVESVi	Protein	Echo Imaging	Between	-1	-0.0115611
RELT	LVMi	Protein	Echo Imaging	Between	1	0.0113929
LTA LTB	Creatinine	Protein	Clinical Biomarker	Between	-1	-0.0110947
FIGF	ANP	Protein	Clinical Biomarker	Between	1	0.011085
GDF15	LA area	Protein	Echo Imaging	Between	1	0.0109972
BMP10	NT-proBNP	Protein	Clinical Biomarker	Between	1	0.0109857
IL1RL1	LA area	Protein	Echo Imaging	Between	1	0.0109728
Hex3Cer(d18:1/24:1) [SL]	LVIDDi	Lipid	Echo Imaging	Between	1	0.0108778
CAPG	NT-proANP	Protein	Clinical Biomarker	Between	1	0.0107658
Peak S/D	LVESVi	Echo Imaging	Echo Imaging	Within	-1	-0.0105237
PI3	Creatinine	Protein	Clinical Biomarker	Between	1	0.0104353
BGN	Creatinine	Protein	Clinical Biomarker	Between	-1	-0.0104311
ADAMTS13	NT-proBNP	Protein	Clinical Biomarker	Between	-1	-0.0103773
EDA2R	Creatinine	Protein	Clinical Biomarker	Between	1	0.0102559
NT-proANP	LVIDSi	Clinical Biomarker	Echo Imaging	Within	1	0.0100961
CLEC7A	Creatinine	Protein	Clinical Biomarker	Between	1	0.0100049
CDH3	NT-proBNP	Protein	Clinical Biomarker	Between	-1	-0.00984132
HIST1H3A	NT-proANP	Protein	Clinical Biomarker	Between	1	0.00982561
MMP7	e'	Protein	Echo Imaging	Between	-1	-0.00975276
ACP5	LA area	Protein	Echo Imaging	Between	-1	-0.00968977
PTN	e'	Protein	Echo Imaging	Between	-1	-0.00967244
CCL18	LA width	Protein	Echo Imaging	Between	1	0.00926424
THBS2	BNP	Protein	Clinical Biomarker	Between	1	0.00925575
SELL	TNI	Protein	Clinical Biomarker	Between	-1	-0.00922618
HIST2H2BE	LVMi	Protein	Echo Imaging	Between	1	0.00909796
CKB CKM	E/e'	Protein	Echo Imaging	Between	-1	-0.00897227
MED1	BNP	Protein	Clinical Biomarker	Between	-1	-0.00887625
SM 37:0	LVIDSi	Lipid	Echo Imaging	Between	1	0.00881767
STC1	LVESVi	Protein	Echo Imaging	Between	1	0.00881548
MB	Creatinine	Protein	Clinical Biomarker	Between	1	0.00840159
AGER	NT-proANP	Protein	Clinical Biomarker	Between	1	0.00834085
NT-proBNP	LA width	Clinical Biomarker	Echo Imaging	Within	1	0.00832428
IGFBP2	BNP	Protein	Clinical Biomarker	Between	1	0.00818217
SPON1	E/e'	Protein	Echo Imaging	Between	1	0.0080528
CTSV	NT-proBNP	Protein	Clinical Biomarker	Between	-1	-0.00799764
CGA FSHB	Creatinine	Protein	Clinical Biomarker	Between	-1	-0.00796692
ANP	E/e'	Clinical Biomarker	Echo Imaging	Within	1	0.00787251
FCN3	NT-proANP	Protein	Clinical Biomarker	Between	-1	-0.00784256
NT-proANP	s'	Clinical Biomarker	Echo Imaging	Within	-1	-0.00778017
IBSP	NT-proBNP	Protein	Clinical Biomarker	Between	1	0.00757385
ADIPOQ	LVIDDi	Protein	Echo Imaging	Between	1	0.00755761
MBL2	PWT	Protein	Echo Imaging	Between	1	0.00735756
THBS2	LA width	Protein	Echo Imaging	Between	1	0.00714751
CCL18	LVIDSi	Protein	Echo Imaging	Between	1	0.00697199
KRAS	Creatinine	Protein	Clinical Biomarker	Between	-1	-0.00693004
CHST15	ANP	Protein	Clinical Biomarker	Between	1	0.00689959
SLPI	LVMi	Protein	Echo Imaging	Between	1	0.00687921
SHBG	LVIDDi	Protein	Echo Imaging	Between	1	0.00685762
S1P (d18:1)	PWT	Lipid	Echo Imaging	Between	-1	-0.00681541
COLEC12	Creatinine	Protein	Clinical Biomarker	Between	-1	-0.00679003
SM 40:2	LA width	Lipid	Echo Imaging	Between	-1	-0.00675616
Peak E/A	LA area	Echo Imaging	Echo Imaging	Within	1	0.006618
PIANP	e'	Protein	Echo Imaging	Between	-1	-0.00644208
C9	BNP	Protein	Clinical Biomarker	Between	1	0.0063147
PKM2	IVS	Protein	Echo Imaging	Between	-1	-0.00624422
BMP10	ANP	Protein	Clinical Biomarker	Between	1	0.00618147
TIMP2	BNP	Protein	Clinical Biomarker	Between	1	0.0061352
POSTN	IVS	Protein	Echo Imaging	Between	1	0.0060565
WIF1	ANP	Protein	Clinical Biomarker	Between	1	0.0057659
TIMP2	ANP	Protein	Clinical Biomarker	Between	1	0.0057085
IGFBP2	ANP	Protein	Clinical Biomarker	Between	1	0.0056082
SERPINA1	BNP	Protein	Clinical Biomarker	Between	1	0.00552064
CCL3L1	LVIDSi	Protein	Echo Imaging	Between	1	0.0054771
METAP2	IVS	Protein	Echo Imaging	Between	-1	-0.00529179
BNP	LVMi	Clinical Biomarker	Echo Imaging	Within	1	0.00524324
RSPO4	E/e'	Protein	Echo Imaging	Between	1	0.00505604
PROS1	LA area	Protein	Echo Imaging	Between	-1	-0.00505442
BMP10	LA area	Protein	Echo Imaging	Between	1	0.00495818
GDF15	NT-proBNP	Protein	Clinical Biomarker	Between	1	0.00495526
EFEMP1	NT-proBNP	Protein	Clinical Biomarker	Between	1	0.00495438
BNP	s'	Clinical Biomarker	Echo Imaging	Within	-1	-0.00478053
PSPN	LA width	Protein	Echo Imaging	Between	1	0.00475772
AHSG	TNI	Protein	Clinical Biomarker	Between	-1	-0.00474073
EFEMP1	E/e'	Protein	Echo Imaging	Between	1	0.00472885
F10	LA width	Protein	Echo Imaging	Between	-1	-0.00467533
FABP3	LA width	Protein	Echo Imaging	Between	1	0.00466966
NT-proANP	LVIDDi	Clinical Biomarker	Echo Imaging	Within	1	0.00459327
WFIKKN1	NT-proBNP	Protein	Clinical Biomarker	Between	-1	-0.00455221
NT-proBNP	LVMi	Clinical Biomarker	Echo Imaging	Within	1	0.00442435
PC(P-36:2)	ANP	Lipid	Clinical Biomarker	Between	1	0.00432862
PLA2G2A	ANP	Protein	Clinical Biomarker	Between	1	0.00430398
NT-proBNP	Peak S/D	Clinical Biomarker	Echo Imaging	Within	-1	-0.00426119
HIST1H3A	LVEF	Protein	Echo Imaging	Between	-1	-0.00415282
BNP	LVIDDi	Clinical Biomarker	Echo Imaging	Within	1	0.00413007
DT	PWT	Echo Imaging	Echo Imaging	Within	1	0.00411841
LVESVi	LVMi	Echo Imaging	Echo Imaging	Within	1	0.00410434
HFE2	Creatinine	Protein	Clinical Biomarker	Between	1	0.00400672
PCSK9	Creatinine	Protein	Clinical Biomarker	Between	-1	-0.00398198
LVESVi	LVIDDi	Echo Imaging	Echo Imaging	Within	1	0.00395698
ADAMTS13	TNI	Protein	Clinical Biomarker	Between	-1	-0.00380621
PC(P-36:2)	NT-proANP	Lipid	Clinical Biomarker	Between	1	0.00376724
CAPG	IVS	Protein	Echo Imaging	Between	1	0.00376681
F3	Creatinine	Protein	Clinical Biomarker	Between	1	0.00373092
TNC	a'	Protein	Echo Imaging	Between	-1	-0.00372921
POSTN	NT-proBNP	Protein	Clinical Biomarker	Between	1	0.00329675
INS	s'	Protein	Echo Imaging	Between	1	0.00324252
GM3(d18:1/16:0)	NT-proBNP	Lipid	Clinical Biomarker	Between	1	0.00306426
PGD	E/e'	Protein	Echo Imaging	Between	-1	-0.00263796
VEGFA	NT-proANP	Protein	Clinical Biomarker	Between	1	0.00261923
PGD	e'	Protein	Echo Imaging	Between	1	0.00258717
HDGFRP2	TNI	Protein	Clinical Biomarker	Between	1	0.0025787
GHR	LVIDSi	Protein	Echo Imaging	Between	-1	-0.00253528
PROC	ANP	Protein	Clinical Biomarker	Between	-1	-0.00252551
SPOCK2	Creatinine	Protein	Clinical Biomarker	Between	-1	-0.00243453
F10	NT-proBNP	Protein	Clinical Biomarker	Between	-1	-0.00238575
SNCA	ANP	Protein	Clinical Biomarker	Between	-1	-0.00233624
CDH3	BNP	Protein	Clinical Biomarker	Between	-1	-0.00212994
FGF23	Creatinine	Protein	Clinical Biomarker	Between	1	0.0020692
PLG	NT-proANP	Protein	Clinical Biomarker	Between	-1	-0.00202801
SM 32:0	Creatinine	Lipid	Clinical Biomarker	Between	-1	-0.00197079
CA6	E/e'	Protein	Echo Imaging	Between	-1	-0.00195347
RAC3	IVS	Protein	Echo Imaging	Between	-1	-0.0019463
HSP90AB1	Peak AR	Protein	Echo Imaging	Between	1	0.00194288
SEMA5A	Creatinine	Protein	Clinical Biomarker	Between	-1	-0.00192669
IL22RA2	TNI	Protein	Clinical Biomarker	Between	-1	-0.0019144
PRSS1	Creatinine	Protein	Clinical Biomarker	Between	1	0.0018345
AFM	LVIDSi	Protein	Echo Imaging	Between	-1	-0.00177689
PDE11A	e'	Protein	Echo Imaging	Between	1	0.0016813
AIP	IVS	Protein	Echo Imaging	Between	-1	-0.00162814
TIMP1	LA area	Protein	Echo Imaging	Between	1	0.00155199
F10	BNP	Protein	Clinical Biomarker	Between	-1	-0.00153894
CE 16:1	Creatinine	Lipid	Clinical Biomarker	Between	-1	-0.00144599
LTBP4	LVMi	Protein	Echo Imaging	Between	1	0.00130109
HSPA1A	IVS	Protein	Echo Imaging	Between	1	0.00118986
PROC	LA width	Protein	Echo Imaging	Between	-1	-0.00118463
TNFRSF13C	ANP	Protein	Clinical Biomarker	Between	-1	-0.00117968
AcylCarnitine 18:2	LVESVi	Lipid	Echo Imaging	Between	1	0.00115839
PTH	NT-proANP	Protein	Clinical Biomarker	Between	1	0.00115721
s'	LA width	Echo Imaging	Echo Imaging	Within	-1	-0.00106739
F10	BNP	Protein	Clinical Biomarker	Between	-1	-0.000977429
PC(P-36:2)	BNP	Lipid	Clinical Biomarker	Between	1	0.000782322
PROS1	LA width	Protein	Echo Imaging	Between	-1	-0.000745339
SPON1	BNP	Protein	Clinical Biomarker	Between	1	0.000662181
GM3(d18:1/16:0)	LVIDDi	Lipid	Echo Imaging	Between	1	0.000654852
SM 39:1	LA width	Lipid	Echo Imaging	Between	-1	-0.000641723
DT	IVS	Echo Imaging	Echo Imaging	Within	1	0.000626916
APCS	LVIDDi	Protein	Echo Imaging	Between	-1	-0.000594507
AcylCarnitine 18:2	NT-proBNP	Lipid	Clinical Biomarker	Between	1	0.000489043
ROBO2	Peak AR	Protein	Echo Imaging	Between	-1	-0.000486455
CA13	LVEF	Protein	Echo Imaging	Between	1	0.000459635
e'	a'	Echo Imaging	Echo Imaging	Within	1	0.000443851
SHBG	PWT	Protein	Echo Imaging	Between	-1	-0.000413115
CFH	LVIDDi	Protein	Echo Imaging	Between	-1	-0.000268914
Peak S/D	s'	Echo Imaging	Echo Imaging	Within	1	0.000247596
TNNT2	LVIDSi	Protein	Echo Imaging	Between	1	0.000231841
B2M	NT-proANP	Protein	Clinical Biomarker	Between	1	0.000229784
AcylCarnitine 14:2	NT-proBNP	Lipid	Clinical Biomarker	Between	1	0.000135858
MAPK11	Creatinine	Protein	Clinical Biomarker	Between	1	7.2832e-05
PTN	LVIDDi	Protein	Echo Imaging	Between	1	4.79266e-05

## Sheet: SuppTable4
Data feature A	Data feature B	Data Type A	Data Type B	Interaction Type	Regularized Partial Correlation	d-score (Event-free)	Direction (Event-free)	absolute d-score (Event-free)	d-score (5 point MACE)	Direction (5 point MACE)	absolute d-score (5 point MACE)
CAPG	TFF3	Protein	Protein	Within	0.018463	-1.44343	down	1.44343	1.65668	up	1.65668
CAPG	FSTL3	Protein	Protein	Within	0.0269305	-1.41621	down	1.41621	1.62545	up	1.62545
CAPG	EPHA2	Protein	Protein	Within	0.0168918	-1.38416	down	1.38416	1.58866	up	1.58866
RELT	CAPG	Protein	Protein	Within	0.0256254	-1.27945	down	1.27945	1.46848	up	1.46848
CAPG	B2M	Protein	Protein	Within	0.0280399	-1.27073	down	1.27073	1.45847	up	1.45847
EFEMP1	BMP10	Protein	Protein	Within	0.00686316	-1.1347	down	1.1347	1.30235	up	1.30235
EFEMP1	FSTL3	Protein	Protein	Within	0.0745069	-1.10532	down	1.10532	1.26862	up	1.26862
PTH	CAPG	Protein	Protein	Within	0.0162075	-1.09673	down	1.09673	1.25877	up	1.25877
PI3	CAPG	Protein	Protein	Within	0.0214714	-1.07719	down	1.07719	1.23634	up	1.23634
CAPG	IL15RA	Protein	Protein	Within	0.00200713	-1.06996	down	1.06996	1.22804	up	1.22804
CAPG	FIGF	Protein	Protein	Within	0.00403698	-1.05443	down	1.05443	1.21021	up	1.21021
CAPG	CST3	Protein	Protein	Within	0.0427872	-1.04683	down	1.04683	1.20149	up	1.20149
BMP10	FSTL3	Protein	Protein	Within	0.0287511	-1.03674	down	1.03674	1.18991	up	1.18991
TFF3	FSTL3	Protein	Protein	Within	0.0279907	-1.02416	down	1.02416	1.17548	up	1.17548
CAPG	TNFRSF4	Protein	Protein	Within	0.0119863	-1.02228	down	1.02228	1.17332	up	1.17332
CAPG	NBL1	Protein	Protein	Within	0.00575046	-1.00707	down	1.00707	1.15585	up	1.15585
EPHA2	TFF3	Protein	Protein	Within	0.0131781	-1.00155	down	1.00155	1.14952	up	1.14952
CAPG	F3	Protein	Protein	Within	0.0341624	-0.99794	down	0.99794	1.14538	up	1.14538
CAPG	ANXA1	Protein	Protein	Within	0.0994383	-0.989997	down	0.989997	1.13626	up	1.13626
EFEMP1	RSPO4	Protein	Protein	Within	0.0331863	-0.982141	down	0.982141	1.12724	up	1.12724
EPHA2	FSTL3	Protein	Protein	Within	0.0540315	-0.982097	down	0.982097	1.12719	up	1.12719
LGALS9	CAPG	Protein	Protein	Within	0.0182926	-0.975705	down	0.975705	1.11986	up	1.11986
EFEMP1	B2M	Protein	Protein	Within	0.036838	-0.97153	down	0.97153	1.11507	up	1.11507
CAPG	TNFRSF1A	Protein	Protein	Within	0.0122336	-0.930172	down	0.930172	1.0676	up	1.0676
EFEMP1	E/e'	Protein	Echo Imaging	Between	0.00472885	-0.9273	down	0.9273	1.0643	up	1.0643
CAPG	IL18RAP	Protein	Protein	Within	-0.00631437	-0.925266	down	0.925266	1.06197	up	1.06197
RELT	TFF3	Protein	Protein	Within	0.00107974	-0.899095	down	0.899095	1.03193	up	1.03193
CAPG	PE 35:2	Protein	Lipid	Between	0.00450296	-0.898809	down	0.898809	1.0316	up	1.0316
IL17RC	CAPG	Protein	Protein	Within	0.0139003	-0.897735	down	0.897735	1.03037	up	1.03037
RELT	FSTL3	Protein	Protein	Within	0.0546241	-0.887314	down	0.887314	1.01841	up	1.01841
B2M	FSTL3	Protein	Protein	Within	0.016391	-0.887235	down	0.887235	1.01832	up	1.01832
TFF3	B2M	Protein	Protein	Within	0.0822032	-0.880164	down	0.880164	1.0102	up	1.0102
FSTL3	LVMi	Protein	Echo Imaging	Between	0.0118583	-0.876528	down	0.876528	1.00603	up	1.00603
EFEMP1	GDF15	Protein	Protein	Within	0.0121898	-0.865328	down	0.865328	0.993173	up	0.993173
RELT	EPHA2	Protein	Protein	Within	0.0505014	-0.848175	down	0.848175	0.973486	up	0.973486
CAPG	MMP12	Protein	Protein	Within	0.0670478	-0.844903	down	0.844903	0.96973	up	0.96973
HAVCR2	CAPG	Protein	Protein	Within	0.0614587	-0.836361	down	0.836361	0.959926	up	0.959926
PARK7	CAPG	Protein	Protein	Within	0.00364257	-0.812645	down	0.812645	0.932707	up	0.932707
CAPG	CHIT1	Protein	Protein	Within	0.0634242	-0.809276	down	0.809276	0.92884	up	0.92884
EFEMP1	NRP1	Protein	Protein	Within	0.00171829	-0.788339	down	0.788339	0.90481	up	0.90481
FSTL3	E/e'	Protein	Echo Imaging	Between	0.0168286	-0.786941	down	0.786941	0.903205	up	0.903205
FABP3	CAPG	Protein	Protein	Within	0.0204788	-0.784035	down	0.784035	0.89987	up	0.89987
GDF15	FSTL3	Protein	Protein	Within	0.0413988	-0.782909	down	0.782909	0.898577	up	0.898577
TFF3	GDF15	Protein	Protein	Within	0.108892	-0.778596	down	0.778596	0.893627	up	0.893627
RELT	LVMi	Protein	Echo Imaging	Between	0.0113929	-0.764176	down	0.764176	0.877077	up	0.877077
CAPG	NT-proANP	Protein	Clinical Biomarker	Between	0.0107658	-0.763393	down	0.763393	0.876178	up	0.876178
RELT	B2M	Protein	Protein	Within	0.0455367	-0.757204	down	0.757204	0.869074	up	0.869074
EFEMP1	IGFBP2	Protein	Protein	Within	0.0236194	-0.754528	down	0.754528	0.866004	up	0.866004
CAPG	MCL1	Protein	Protein	Within	0.0433305	-0.745564	down	0.745564	0.855715	up	0.855715
EFEMP1	CST3	Protein	Protein	Within	0.0150038	-0.744211	down	0.744211	0.854163	up	0.854163
EFEMP1	FIGF	Protein	Protein	Within	0.0270831	-0.73981	down	0.73981	0.849111	up	0.849111
CAPG	IVS	Protein	Echo Imaging	Between	0.00376681	-0.734506	down	0.734506	0.843023	up	0.843023
CAPG	EFNA5	Protein	Protein	Within	0.0117076	-0.724355	down	0.724355	0.831373	up	0.831373
CAPG	ISG15	Protein	Protein	Within	0.00700714	-0.719094	down	0.719094	0.825334	up	0.825334
CAPG	TNFRSF1B	Protein	Protein	Within	0.0219025	-0.715318	down	0.715318	0.821001	up	0.821001
EFEMP1	RSPO3	Protein	Protein	Within	0.0407426	-0.71363	down	0.71363	0.819063	up	0.819063
CAPG	EIF5	Protein	Protein	Within	0.0366262	-0.71226	down	0.71226	0.81749	up	0.81749
IGFBP2	TFF3	Protein	Protein	Within	0.0123051	-0.704945	down	0.704945	0.809095	up	0.809095
IL1RN	CAPG	Protein	Protein	Within	0.00267709	-0.699773	down	0.699773	0.803158	up	0.803158
EFEMP1	TNFRSF4	Protein	Protein	Within	0.047063	-0.698912	down	0.698912	0.80217	up	0.80217
RSPO4	BNP	Protein	Clinical Biomarker	Between	0.0309716	-0.698024	down	0.698024	0.801151	up	0.801151
PTH	TFF3	Protein	Protein	Within	0.0170808	-0.689286	down	0.689286	0.791122	up	0.791122
IGFBP2	EPHA2	Protein	Protein	Within	0.0257961	-0.683008	down	0.683008	0.783917	up	0.783917
PI3	TFF3	Protein	Protein	Within	0.0176039	-0.669659	down	0.669659	0.768595	up	0.768595
NRP1	BMP10	Protein	Protein	Within	0.00579467	-0.669149	down	0.669149	0.76801	up	0.76801
TFF3	PYY	Protein	Protein	Within	0.0549628	-0.66794	down	0.66794	0.766622	up	0.766622
DCTN2	FSTL3	Protein	Protein	Within	0.0426428	-0.663296	down	0.663296	0.761293	up	0.761293
CAPG	e'	Protein	Echo Imaging	Between	-0.0226594	-0.661097	down	0.661097	0.758768	up	0.758768
BMP10	IL15RA	Protein	Protein	Within	0.00331053	-0.658168	down	0.658168	0.755407	up	0.755407
GDF15	B2M	Protein	Protein	Within	0.0175557	-0.656393	down	0.656393	0.75337	up	0.75337
IL15RA	FSTL3	Protein	Protein	Within	0.0198828	-0.65371	down	0.65371	0.75029	up	0.75029
PI3	FSTL3	Protein	Protein	Within	0.00463045	-0.653406	down	0.653406	0.749941	up	0.749941
DCTN2	EPHA2	Protein	Protein	Within	0.0311493	-0.649848	down	0.649848	0.745858	up	0.745858
EFEMP1	SPON1	Protein	Protein	Within	0.0828298	-0.645649	down	0.645649	0.741038	up	0.741038
FSTL3	CST3	Protein	Protein	Within	0.0346385	-0.644792	down	0.644792	0.740055	up	0.740055
FSTL3	FIGF	Protein	Protein	Within	0.0381847	-0.637154	down	0.637154	0.731288	up	0.731288
TFF3	FIGF	Protein	Protein	Within	0.00393121	-0.627519	down	0.627519	0.720229	up	0.720229
FSTL3	EFNA4	Protein	Protein	Within	0.0243877	-0.626321	down	0.626321	0.718855	up	0.718855
FSTL3	NBL1	Protein	Protein	Within	0.0098015	-0.622093	down	0.622093	0.714002	up	0.714002
EPHA2	IL15RA	Protein	Protein	Within	0.0179922	-0.622077	down	0.622077	0.713983	up	0.713983
TFF3	CST3	Protein	Protein	Within	0.0464195	-0.619121	down	0.619121	0.710591	up	0.710591
BMP10	NBL1	Protein	Protein	Within	0.00699882	-0.61508	down	0.61508	0.705953	up	0.705953
TFF3	EFNA4	Protein	Protein	Within	0.0712873	-0.61185	down	0.61185	0.702246	up	0.702246
FSTL3	PE 34:2	Protein	Lipid	Between	0.0130317	-0.609693	down	0.609693	0.69977	up	0.69977
MAP2K4	HRG	Protein	Protein	Within	0.219003	0.604644	up	0.604644	-0.693975	down	0.693975
FSTL3	DSC2	Protein	Protein	Within	0.0138516	-0.604464	down	0.604464	0.693769	up	0.693769
CAPG	GSTP1	Protein	Protein	Within	0.0208551	-0.603064	down	0.603064	0.692162	up	0.692162
EPHA2	EFNA4	Protein	Protein	Within	0.037801	-0.598956	down	0.598956	0.687447	up	0.687447
CAPG	CCL7	Protein	Protein	Within	0.0161128	-0.595978	down	0.595978	0.684029	up	0.684029
FSTL3	THBS2	Protein	Protein	Within	0.046291	-0.595017	down	0.595017	0.682926	up	0.682926
TFF3	DSC2	Protein	Protein	Within	0.0526186	-0.5944	down	0.5944	0.682218	up	0.682218
EPHA2	RSPO3	Protein	Protein	Within	0.0202428	-0.591354	down	0.591354	0.678722	up	0.678722
TFF3	NBL1	Protein	Protein	Within	0.0334704	-0.588536	down	0.588536	0.675488	up	0.675488
TFF3	REG4	Protein	Protein	Within	0.109878	-0.58834	down	0.58834	0.675263	up	0.675263
BNP	LVMi	Clinical Biomarker	Echo Imaging	Between	0.00524324	-0.585124	down	0.585124	0.671572	up	0.671572
TFF3	REG1A	Protein	Protein	Within	0.0451864	-0.58483	down	0.58483	0.671234	up	0.671234
PLG	KDR	Protein	Protein	Within	0.0163267	0.582959	up	0.582959	-0.669086	down	0.669086
DCTN2	ASGR1	Protein	Protein	Within	0.00571459	-0.579299	down	0.579299	0.664885	up	0.664885
EPHA2	NBL1	Protein	Protein	Within	0.103397	-0.578992	down	0.578992	0.664533	up	0.664533
BMP10	FIGF	Protein	Protein	Within	0.0554272	-0.578245	down	0.578245	0.663676	up	0.663676
EPHA2	DSC2	Protein	Protein	Within	0.00517377	-0.57545	down	0.57545	0.660468	up	0.660468
IGFBP2	BNP	Protein	Clinical Biomarker	Between	0.00818217	-0.571909	down	0.571909	0.656404	up	0.656404
BMP10	RSPO3	Protein	Protein	Within	0.0126657	-0.567209	down	0.567209	0.65101	up	0.65101
F3	EPHA2	Protein	Protein	Within	0.0486263	-0.554907	down	0.554907	0.63689	up	0.63689
BMP10	THBS2	Protein	Protein	Within	0.0567909	-0.548263	down	0.548263	0.629264	up	0.629264
CXCL10	BMP10	Protein	Protein	Within	0.0112684	-0.543085	down	0.543085	0.623321	up	0.623321
TFF3	SECTM1	Protein	Protein	Within	0.0488385	-0.540744	down	0.540744	0.620635	up	0.620635
BMP10	LA area	Protein	Echo Imaging	Between	0.00495818	-0.537121	down	0.537121	0.616476	up	0.616476
ASGR1	NBL1	Protein	Protein	Within	0.0507898	-0.535777	down	0.535777	0.614933	up	0.614933
TFF3	SMOC1	Protein	Protein	Within	0.0118014	-0.534536	down	0.534536	0.61351	up	0.61351
RELT	CST3	Protein	Protein	Within	0.104074	-0.530553	down	0.530553	0.608938	up	0.608938
FSTL3	TNFRSF1A	Protein	Protein	Within	0.0686739	-0.528003	down	0.528003	0.606011	up	0.606011
RELT	IL15RA	Protein	Protein	Within	0.0144521	-0.526747	down	0.526747	0.604569	up	0.604569
DCTN2	B2M	Protein	Protein	Within	0.00224957	-0.524656	down	0.524656	0.602169	up	0.602169
FSTL3	SMOC1	Protein	Protein	Within	0.0271786	-0.523546	down	0.523546	0.600896	up	0.600896
PTH	RELT	Protein	Protein	Within	0.00777066	-0.522425	down	0.522425	0.599609	up	0.599609
CSF3	TFF3	Protein	Protein	Within	0.00518104	-0.518716	down	0.518716	0.595352	up	0.595352
EPHA2	FCGR2B	Protein	Protein	Within	0.00736529	-0.517905	down	0.517905	0.594421	up	0.594421
EPHA2	TNFRSF1A	Protein	Protein	Within	0.0321935	-0.517464	down	0.517464	0.593915	up	0.593915
EFEMP1	NT-proBNP	Protein	Clinical Biomarker	Between	0.00495438	-0.517123	down	0.517123	0.593523	up	0.593523
RELT	PI3	Protein	Protein	Within	0.0475712	-0.515585	down	0.515585	0.591759	up	0.591759
EPHA2	SMOC1	Protein	Protein	Within	0.023524	-0.515178	down	0.515178	0.591292	up	0.591292
PI3	B2M	Protein	Protein	Within	0.00299256	-0.513808	down	0.513808	0.589719	up	0.589719
B2M	IL15RA	Protein	Protein	Within	0.0512112	-0.512995	down	0.512995	0.588786	up	0.588786
CAPG	RBM39	Protein	Protein	Within	0.0515202	-0.510912	down	0.510912	0.586395	up	0.586395
BMP10	ANP	Protein	Clinical Biomarker	Between	0.00618147	-0.509527	down	0.509527	0.584805	up	0.584805
TFF3	TNFRSF1A	Protein	Protein	Within	0.0368228	-0.506955	down	0.506955	0.581853	up	0.581853
RSPO4	E/e'	Protein	Echo Imaging	Between	0.00505604	-0.506895	down	0.506895	0.581785	up	0.581785
FSTL3	CD4	Protein	Protein	Within	0.00253179	-0.505614	down	0.505614	0.580314	up	0.580314
RELT	NBL1	Protein	Protein	Within	0.00645784	-0.504881	down	0.504881	0.579473	up	0.579473
B2M	EFNA4	Protein	Protein	Within	0.0485209	-0.50048	down	0.50048	0.574422	up	0.574422
RELT	EFNA4	Protein	Protein	Within	0.0848374	-0.498835	down	0.498835	0.572534	up	0.572534
PTH	B2M	Protein	Protein	Within	0.0116447	-0.498192	down	0.498192	0.571796	up	0.571796
B2M	NBL1	Protein	Protein	Within	0.00392523	-0.495948	down	0.495948	0.569221	up	0.569221
MAP2K4	FAP	Protein	Protein	Within	0.0231035	0.490325	up	0.490325	-0.562767	down	0.562767
B2M	CST3	Protein	Protein	Within	0.167322	-0.487845	down	0.487845	0.55992	up	0.55992
EPHA2	IL18RAP	Protein	Protein	Within	-0.0133667	-0.484921	down	0.484921	0.556565	up	0.556565
CAPG	HDGFRP2	Protein	Protein	Within	0.049984	-0.4849	down	0.4849	0.55654	up	0.55654
ASGR1	NSFL1C	Protein	Protein	Within	0.0074086	-0.482768	down	0.482768	0.554094	up	0.554094
RELT	TNFRSF4	Protein	Protein	Within	0.0129819	-0.481902	down	0.481902	0.553098	up	0.553098
CSRP3	EFEMP1	Protein	Protein	Within	0.0177383	-0.478941	down	0.478941	0.549701	up	0.549701
TFF3	CD59	Protein	Protein	Within	0.0122428	-0.477023	down	0.477023	0.547499	up	0.547499
RELT	DSC2	Protein	Protein	Within	0.00950702	-0.476397	down	0.476397	0.546781	up	0.546781
IGFBP2	RSPO4	Protein	Protein	Within	0.0780844	-0.476107	down	0.476107	0.546448	up	0.546448
CAPG	SPP1	Protein	Protein	Within	0.00429525	-0.476062	down	0.476062	0.546396	up	0.546396
B2M	DSC2	Protein	Protein	Within	0.011536	-0.473512	down	0.473512	0.543469	up	0.543469
SCARF1	B2M	Protein	Protein	Within	0.074819	-0.47261	down	0.47261	0.542434	up	0.542434
RELT	F3	Protein	Protein	Within	0.0306509	-0.469799	down	0.469799	0.539208	up	0.539208
B2M	REG1A	Protein	Protein	Within	0.00132367	-0.469696	down	0.469696	0.539089	up	0.539089
LGALS9	ASGR1	Protein	Protein	Within	0.0264296	-0.469434	down	0.469434	0.538788	up	0.538788
PRSS2	TFF3	Protein	Protein	Within	0.0217264	-0.469404	down	0.469404	0.538754	up	0.538754
EFEMP1	TIMP1	Protein	Protein	Within	0.0648265	-0.464738	down	0.464738	0.533399	up	0.533399
CSF3	EPHA2	Protein	Protein	Within	0.0306714	-0.464163	down	0.464163	0.532739	up	0.532739
TFF2	TFF3	Protein	Protein	Within	0.0424224	-0.463658	down	0.463658	0.53216	up	0.53216
FGF23	BMP10	Protein	Protein	Within	0.0167632	-0.463335	down	0.463335	0.531789	up	0.531789
PRSS2	FSTL3	Protein	Protein	Within	0.0108824	-0.460541	down	0.460541	0.528582	up	0.528582
TNFRSF4	B2M	Protein	Protein	Within	0.0329202	-0.458428	down	0.458428	0.526157	up	0.526157
TFF2	BMP10	Protein	Protein	Within	0.00796626	-0.447764	down	0.447764	0.513918	up	0.513918
LGALS9	RELT	Protein	Protein	Within	0.00568459	-0.447371	down	0.447371	0.513467	up	0.513467
LGALS9	B2M	Protein	Protein	Within	0.0026442	-0.443361	down	0.443361	0.508864	up	0.508864
BMP10	ANGPT2	Protein	Protein	Within	0.0771623	-0.443105	down	0.443105	0.50857	up	0.50857
EFEMP1	UNC5C	Protein	Protein	Within	0.00443969	-0.440508	down	0.440508	0.505589	up	0.505589
TFF2	EPHA2	Protein	Protein	Within	0.0270102	-0.436831	down	0.436831	0.501369	up	0.501369
PLA2G1B	EPHA2	Protein	Protein	Within	0.00754732	-0.436297	down	0.436297	0.500757	up	0.500757
FSTL3	TIMP1	Protein	Protein	Within	0.0165574	-0.435218	down	0.435218	0.499518	up	0.499518
CXCL10	B2M	Protein	Protein	Within	0.00841138	-0.429951	down	0.429951	0.493473	up	0.493473
HAVCR2	FSTL3	Protein	Protein	Within	0.0208106	-0.42814	down	0.42814	0.491394	up	0.491394
TFF3	MMP12	Protein	Protein	Within	0.00671671	-0.427344	down	0.427344	0.490481	up	0.490481
RELT	TNFRSF1A	Protein	Protein	Within	0.0220656	-0.426333	down	0.426333	0.48932	up	0.48932
ASGR1	NUDCD3	Protein	Protein	Within	0.0204109	-0.421099	down	0.421099	0.483313	up	0.483313
GDF15	CST3	Protein	Protein	Within	0.0108094	-0.420925	down	0.420925	0.483113	up	0.483113
EPHA2	KLK11	Protein	Protein	Within	0.00187206	-0.420147	down	0.420147	0.48222	up	0.48222
TNNT2	RELT	Protein	Protein	Within	0.0100327	-0.418975	down	0.418975	0.480875	up	0.480875
GOT1	LCMT1	Protein	Protein	Within	0.120337	-0.418424	down	0.418424	0.480243	up	0.480243
EFEMP1	NT-proANP	Protein	Clinical Biomarker	Between	0.0615221	-0.418172	down	0.418172	0.479953	up	0.479953
EPHA2	PPY	Protein	Protein	Within	0.0186969	-0.41615	down	0.41615	0.477633	up	0.477633
CAPG	C4A C4B	Protein	Protein	Within	-0.00619852	-0.412568	down	0.412568	0.473522	up	0.473522
B2M	SECTM1	Protein	Protein	Within	0.0991182	-0.408395	down	0.408395	0.468732	up	0.468732
B2M	TNFRSF1A	Protein	Protein	Within	0.0487651	-0.40336	down	0.40336	0.462953	up	0.462953
CAPG	DDR2	Protein	Protein	Within	0.0169104	-0.402985	down	0.402985	0.462523	up	0.462523
B2M	SMOC1	Protein	Protein	Within	0.00439502	-0.402498	down	0.402498	0.461963	up	0.461963
HAVCR2	EPHA2	Protein	Protein	Within	0.0631409	-0.401386	down	0.401386	0.460687	up	0.460687
ASGR1	DLL4	Protein	Protein	Within	0.0364513	-0.399004	down	0.399004	0.457954	up	0.457954
FABP3	FSTL3	Protein	Protein	Within	0.0749119	-0.398612	down	0.398612	0.457504	up	0.457504
PI3	GDF15	Protein	Protein	Within	0.0184849	-0.39397	down	0.39397	0.452176	up	0.452176
FIGF	BNP	Protein	Clinical Biomarker	Between	0.0164319	-0.392952	down	0.392952	0.451007	up	0.451007
SERPINF1	FSTL3	Protein	Protein	Within	0.0345392	-0.392937	down	0.392937	0.45099	up	0.45099
CAPG	HIST1H1C	Protein	Protein	Within	0.0493735	-0.391367	down	0.391367	0.449188	up	0.449188
FSTL3	LAYN	Protein	Protein	Within	0.0373928	-0.390762	down	0.390762	0.448494	up	0.448494
FABP3	TFF3	Protein	Protein	Within	0.0113984	-0.389838	down	0.389838	0.447434	up	0.447434
MAP2K4	SOD2	Protein	Protein	Within	0.00096013	0.389429	up	0.389429	-0.446964	down	0.446964
FABP3	BMP10	Protein	Protein	Within	0.0141161	-0.38733	down	0.38733	0.444555	up	0.444555
TFF3	LAYN	Protein	Protein	Within	0.0152915	-0.387312	down	0.387312	0.444534	up	0.444534
CCL15	FSTL3	Protein	Protein	Within	0.0110094	-0.385861	down	0.385861	0.442869	up	0.442869
THBS2	BNP	Protein	Clinical Biomarker	Between	0.00925575	-0.380321	down	0.380321	0.436511	up	0.436511
TFF3	CCL15	Protein	Protein	Within	0.0337297	-0.37918	down	0.37918	0.4352	up	0.4352
RELT	CD4	Protein	Protein	Within	0.00379256	-0.378853	down	0.378853	0.434825	up	0.434825
CSF1	FSTL3	Protein	Protein	Within	0.0155757	-0.378788	down	0.378788	0.434751	up	0.434751
TFF2	ASGR1	Protein	Protein	Within	0.0022385	-0.376778	down	0.376778	0.432444	up	0.432444
BNP	E/e'	Clinical Biomarker	Echo Imaging	Between	0.0320668	-0.375671	down	0.375671	0.431173	up	0.431173
BMP10	LAYN	Protein	Protein	Within	0.02455	-0.371427	down	0.371427	0.426303	up	0.426303
RELT	IL18RAP	Protein	Protein	Within	-0.0372299	-0.369825	down	0.369825	0.424464	up	0.424464
EPHA2	CCL15	Protein	Protein	Within	0.0312922	-0.36458	down	0.36458	0.418444	up	0.418444
ASGR1	CSF3	Protein	Protein	Within	0.00264261	-0.363383	down	0.363383	0.417069	up	0.417069
EPHA2	LAYN	Protein	Protein	Within	0.0484766	-0.362239	down	0.362239	0.415757	up	0.415757
BMP10	IL18RAP	Protein	Protein	Within	-0.0034683	-0.358222	down	0.358222	0.411147	up	0.411147
FSTL3	PE 34:1	Protein	Lipid	Between	0.00329229	-0.356425	down	0.356425	0.409083	up	0.409083
B2M	CD59	Protein	Protein	Within	0.011246	-0.35636	down	0.35636	0.409009	up	0.409009
RELT	CD59	Protein	Protein	Within	0.0385018	-0.355907	down	0.355907	0.408489	up	0.408489
BMP10	NT-proBNP	Protein	Clinical Biomarker	Between	0.0109857	-0.354689	down	0.354689	0.407091	up	0.407091
GDF15	PYY	Protein	Protein	Within	0.0484948	-0.350829	down	0.350829	0.402661	up	0.402661
B2M	CD4	Protein	Protein	Within	0.0090389	-0.350522	down	0.350522	0.402308	up	0.402308
FSTL3	NT-proANP	Protein	Clinical Biomarker	Between	0.0208366	-0.348463	down	0.348463	0.399945	up	0.399945
RSPO4	FIGF	Protein	Protein	Within	0.0878769	-0.346361	down	0.346361	0.397533	up	0.397533
MAP2K4	EGFR	Protein	Protein	Within	0.0807594	0.34574	up	0.34574	-0.39682	down	0.39682
BMP6	GOT1	Protein	Protein	Within	0.0220713	-0.343722	down	0.343722	0.394504	up	0.394504
UNC5C	FSTL3	Protein	Protein	Within	0.0421525	-0.341052	down	0.341052	0.39144	up	0.39144
SOD2	KDR	Protein	Protein	Within	0.0118794	0.340957	up	0.340957	-0.391331	down	0.391331
SPON1	BNP	Protein	Clinical Biomarker	Between	0.000662181	-0.339332	down	0.339332	0.389466	up	0.389466
THPO	ASGR1	Protein	Protein	Within	0.00388141	-0.339108	down	0.339108	0.389209	up	0.389209
GDF15	THBS2	Protein	Protein	Within	0.0593452	-0.336556	down	0.336556	0.386279	up	0.386279
MAP2K4	ADAMTS13	Protein	Protein	Within	0.00966759	0.334766	up	0.334766	-0.384224	down	0.384224
RSPO4	TNFRSF4	Protein	Protein	Within	0.0369871	-0.331919	down	0.331919	0.380957	up	0.380957
EPHA2	TPSB2	Protein	Protein	Within	0.00508834	-0.330734	down	0.330734	0.379598	up	0.379598
KDR	EGFR	Protein	Protein	Within	0.0766168	0.329945	up	0.329945	-0.378692	down	0.378692
ASGR1	PLA2G1B	Protein	Protein	Within	0.0217366	-0.328939	down	0.328939	0.377536	up	0.377536
EFEMP1	CCDC80	Protein	Protein	Within	0.049636	-0.328375	down	0.328375	0.37689	up	0.37689
RELT	CST2	Protein	Protein	Within	0.00728339	-0.327729	down	0.327729	0.376149	up	0.376149
ASGR1	LY9	Protein	Protein	Within	0.0279184	-0.327338	down	0.327338	0.3757	up	0.3757
BMP10	BMP7	Protein	Protein	Within	0.0197264	-0.326155	down	0.326155	0.374341	up	0.374341
ASGR1	KLK11	Protein	Protein	Within	0.0338115	-0.323467	down	0.323467	0.371257	up	0.371257
IGFBP2	FIGF	Protein	Protein	Within	0.0222299	-0.322017	down	0.322017	0.369592	up	0.369592
ASGR1	TNFSF15	Protein	Protein	Within	0.152228	-0.321488	down	0.321488	0.368985	up	0.368985
TFF3	NT-proANP	Protein	Clinical Biomarker	Between	0.0126992	-0.319954	down	0.319954	0.367224	up	0.367224
FSTL3	CHI3L1	Protein	Protein	Within	0.0548981	-0.319903	down	0.319903	0.367166	up	0.367166
FSTL3	TNFRSF1B	Protein	Protein	Within	0.0468681	-0.319844	down	0.319844	0.367098	up	0.367098
UNC5C	TFF3	Protein	Protein	Within	0.043168	-0.318979	down	0.318979	0.366105	up	0.366105
GDF15	LA area	Protein	Echo Imaging	Between	0.0109972	-0.318897	down	0.318897	0.366011	up	0.366011
TFF3	CST5	Protein	Protein	Within	0.0375818	-0.316655	down	0.316655	0.363438	up	0.363438
RSPO4	RSPO3	Protein	Protein	Within	0.0594206	-0.316626	down	0.316626	0.363405	up	0.363405
PRSS2	B2M	Protein	Protein	Within	0.0158297	-0.316317	down	0.316317	0.36305	up	0.36305
CXCL9	B2M	Protein	Protein	Within	0.0614945	-0.316246	down	0.316246	0.362969	up	0.362969
GDF15	TNFRSF1A	Protein	Protein	Within	0.00299857	-0.315582	down	0.315582	0.362207	up	0.362207
ASGR1	INHBA	Protein	Protein	Within	0.0117165	-0.312544	down	0.312544	0.35872	up	0.35872
UNC5C	EPHA2	Protein	Protein	Within	0.0568351	-0.312363	down	0.312363	0.358512	up	0.358512
HAVCR2	RELT	Protein	Protein	Within	0.0247474	-0.312279	down	0.312279	0.358416	up	0.358416
ASGR1	FABP3	Protein	Protein	Within	0.00165265	-0.311919	down	0.311919	0.358002	up	0.358002
NCR1	EPHA2	Protein	Protein	Within	0.0178799	-0.310498	down	0.310498	0.356372	up	0.356372
CSF1	BMP10	Protein	Protein	Within	0.0264317	-0.310114	down	0.310114	0.355931	up	0.355931
MAP2K4	GPC5	Protein	Protein	Within	0.00208128	0.309581	up	0.309581	-0.355319	down	0.355319
CBX5	KDR	Protein	Protein	Within	0.00174666	0.30653	up	0.30653	-0.351817	down	0.351817
RELT	PPY	Protein	Protein	Within	0.0115076	-0.30375	down	0.30375	0.348627	up	0.348627
GDF15	REG4	Protein	Protein	Within	0.0394618	-0.303039	down	0.303039	0.34781	up	0.34781
EPHA2	TNFRSF1B	Protein	Protein	Within	0.0121331	-0.301874	down	0.301874	0.346473	up	0.346473
CAPG	HIST1H3A	Protein	Protein	Within	0.0250218	-0.299633	down	0.299633	0.343901	up	0.343901
B2M	TIMP1	Protein	Protein	Within	0.00416108	-0.292604	down	0.292604	0.335834	up	0.335834
MAP2K4	IL1RAP	Protein	Protein	Within	0.00594914	0.288517	up	0.288517	-0.331143	down	0.331143
MAP2K4	NOTCH1	Protein	Protein	Within	0.0390491	0.28446	up	0.28446	-0.326487	down	0.326487
BMP10	NT-proANP	Protein	Clinical Biomarker	Between	0.0191933	-0.284211	down	0.284211	0.3262	up	0.3262
EPHA2	CST5	Protein	Protein	Within	0.0314235	-0.28418	down	0.28418	0.326165	up	0.326165
IGFBP2	SCARF1	Protein	Protein	Within	0.0014333	-0.283597	down	0.283597	0.325496	up	0.325496
EPHA2	EFNA5	Protein	Protein	Within	0.0627163	-0.283596	down	0.283596	0.325496	up	0.325496
TNNT2	GDF15	Protein	Protein	Within	0.0276126	-0.282893	down	0.282893	0.324688	up	0.324688
RSPO4	SPON1	Protein	Protein	Within	0.0374715	-0.282485	down	0.282485	0.32422	up	0.32422
B2M	EFNB1	Protein	Protein	Within	0.0365488	-0.279847	down	0.279847	0.321193	up	0.321193
EFEMP1	LYVE1	Protein	Protein	Within	0.0294593	-0.277373	down	0.277373	0.318353	up	0.318353
FABP3	B2M	Protein	Protein	Within	0.00815471	-0.276803	down	0.276803	0.317699	up	0.317699
CADM3	BMP10	Protein	Protein	Within	0.0911557	-0.276611	down	0.276611	0.317478	up	0.317478
EPHB6	FSTL3	Protein	Protein	Within	0.0239685	-0.273467	down	0.273467	0.313869	up	0.313869
SERPINF1	RELT	Protein	Protein	Within	0.0295057	-0.272914	down	0.272914	0.313234	up	0.313234
KDR	ADAMTS13	Protein	Protein	Within	0.0537225	0.270773	up	0.270773	-0.310777	down	0.310777
NBL1	CST3	Protein	Protein	Within	0.0330078	-0.270325	down	0.270325	0.310264	up	0.310264
RSPO4	ANP	Protein	Clinical Biomarker	Between	0.0315674	-0.268843	down	0.268843	0.308562	up	0.308562
RELT	LAYN	Protein	Protein	Within	0.00902334	-0.268222	down	0.268222	0.307849	up	0.307849
EPHA2	IL27 EBI3	Protein	Protein	Within	0.00108647	-0.265923	down	0.265923	0.305211	up	0.305211
CAPG	ENO1	Protein	Protein	Within	-0.0195453	-0.265918	down	0.265918	0.305205	up	0.305205
RELT	CCL15	Protein	Protein	Within	0.0227971	-0.265879	down	0.265879	0.30516	up	0.30516
IGFBP2	REG1A	Protein	Protein	Within	0.0503634	-0.264717	down	0.264717	0.303827	up	0.303827
EPHB6	EPHA2	Protein	Protein	Within	0.00853088	-0.254763	down	0.254763	0.292402	up	0.292402
EPHA2	FAM3D	Protein	Protein	Within	0.00147556	-0.254651	down	0.254651	0.292273	up	0.292273
EFNA4	CST3	Protein	Protein	Within	0.0194649	-0.251695	down	0.251695	0.288881	up	0.288881
IGFBP2	RSPO3	Protein	Protein	Within	0.00276556	-0.250981	down	0.250981	0.288061	up	0.288061
MED1	MAP2K4	Protein	Protein	Within	0.0592771	0.250582	up	0.250582	-0.287604	down	0.287604
EFEMP1	IGHA1 IGHA2	Protein	Protein	Within	0.125329	-0.239251	down	0.239251	0.274598	up	0.274598
ASGR1	COTL1	Protein	Protein	Within	0.0114912	-0.237756	down	0.237756	0.272883	up	0.272883
IL15RA	CST3	Protein	Protein	Within	0.00366613	-0.236159	down	0.236159	0.27105	up	0.27105
ASGR1	GPD1	Protein	Protein	Within	0.0181641	-0.234019	down	0.234019	0.268594	up	0.268594
ASGR1	BGN	Protein	Protein	Within	0.0605547	-0.233884	down	0.233884	0.268439	up	0.268439
TFF3	IL17F	Protein	Protein	Within	0.00837366	-0.230798	down	0.230798	0.264897	up	0.264897
IL15RA	EFNA4	Protein	Protein	Within	0.0322544	-0.229983	down	0.229983	0.263961	up	0.263961
MAP2K4	ECE1	Protein	Protein	Within	0.0191443	0.228319	up	0.228319	-0.262051	down	0.262051
SOD2	PLG	Protein	Protein	Within	0.0157935	0.223798	up	0.223798	-0.256862	down	0.256862
B2M	NT-proANP	Protein	Clinical Biomarker	Between	0.000229784	-0.222334	down	0.222334	0.255182	up	0.255182
EPHA2	IL17F	Protein	Protein	Within	0.0260043	-0.217883	down	0.217883	0.250074	up	0.250074
DCTN2	IL15RA	Protein	Protein	Within	0.0288191	-0.215971	down	0.215971	0.247879	up	0.247879
RELT	TNFRSF1B	Protein	Protein	Within	0.0120452	-0.215729	down	0.215729	0.247601	up	0.247601
IL15RA	NBL1	Protein	Protein	Within	0.0490369	-0.214794	down	0.214794	0.246528	up	0.246528
CST3	DSC2	Protein	Protein	Within	0.048946	-0.21276	down	0.21276	0.244194	up	0.244194
RELT	EFNA5	Protein	Protein	Within	0.0332342	-0.211564	down	0.211564	0.242821	up	0.242821
PI3	EFNA4	Protein	Protein	Within	0.0152362	-0.208453	down	0.208453	0.23925	up	0.23925
SCARF1	IL15RA	Protein	Protein	Within	0.0148928	-0.20758	down	0.20758	0.238249	up	0.238249
AMH	KDR	Protein	Protein	Within	0.011445	0.207141	up	0.207141	-0.237745	down	0.237745
DLL1	FSTL3	Protein	Protein	Within	0.0144834	-0.207127	down	0.207127	0.237728	up	0.237728
IL15RA	DSC2	Protein	Protein	Within	0.00296458	-0.207031	down	0.207031	0.237618	up	0.237618
GOT1	COTL1	Protein	Protein	Within	0.0395227	-0.206956	down	0.206956	0.237532	up	0.237532
RELT	MCL1	Protein	Protein	Within	0.0180064	-0.206844	down	0.206844	0.237403	up	0.237403
TXNDC12	PLG	Protein	Protein	Within	0.0504223	0.205703	up	0.205703	-0.236093	down	0.236093
RSPO4	ANGPT2	Protein	Protein	Within	0.0278058	-0.205678	down	0.205678	0.236065	up	0.236065
ASGR1	CADM3	Protein	Protein	Within	0.059981	-0.205608	down	0.205608	0.235985	up	0.235985
EPHA2	JAM2	Protein	Protein	Within	0.0148907	-0.204922	down	0.204922	0.235197	up	0.235197
SCARF1	NBL1	Protein	Protein	Within	0.00171356	-0.204125	down	0.204125	0.234283	up	0.234283
NBL1	DSC2	Protein	Protein	Within	0.0318156	-0.201355	down	0.201355	0.231103	up	0.231103
IGFBP2	SMOC1	Protein	Protein	Within	0.00219014	-0.199324	down	0.199324	0.228772	up	0.228772
SCARF1	CST3	Protein	Protein	Within	0.0233504	-0.198296	down	0.198296	0.227592	up	0.227592
RELT	NCR1	Protein	Protein	Within	0.0136626	-0.198085	down	0.198085	0.22735	up	0.22735
CXCL9	RSPO4	Protein	Protein	Within	0.0335035	-0.195699	down	0.195699	0.224612	up	0.224612
B2M	TNFRSF1B	Protein	Protein	Within	0.0850237	-0.195247	down	0.195247	0.224094	up	0.224094
ASGR1	PRKACA	Protein	Protein	Within	0.00801064	-0.195209	down	0.195209	0.224049	up	0.224049
ANGPT2	BNP	Protein	Clinical Biomarker	Between	0.0336353	-0.194049	down	0.194049	0.222719	up	0.222719
PI3	CST3	Protein	Protein	Within	0.0305636	-0.193874	down	0.193874	0.222517	up	0.222517
GDF15	NT-proBNP	Protein	Clinical Biomarker	Between	0.00495526	-0.193871	down	0.193871	0.222513	up	0.222513
EFNA4	DSC2	Protein	Protein	Within	0.0627002	-0.192252	down	0.192252	0.220655	up	0.220655
DLL1	EPHA2	Protein	Protein	Within	0.0138117	-0.190716	down	0.190716	0.218893	up	0.218893
DSC2	FIGF	Protein	Protein	Within	0.0166886	-0.190138	down	0.190138	0.21823	up	0.21823
FAP	CKB CKM	Protein	Protein	Within	0.0749271	0.189921	up	0.189921	-0.21798	down	0.21798
NBL1	REG1A	Protein	Protein	Within	0.00925609	-0.187691	down	0.187691	0.215421	up	0.215421
STC1	FSTL3	Protein	Protein	Within	0.0194032	-0.184634	down	0.184634	0.211912	up	0.211912
SCARF1	PI3	Protein	Protein	Within	0.0126762	-0.182715	down	0.182715	0.20971	up	0.20971
PI3	DSC2	Protein	Protein	Within	0.0447668	-0.182448	down	0.182448	0.209404	up	0.209404
SHC1	REG1A	Protein	Protein	Within	0.0244781	-0.182309	down	0.182309	0.209243	up	0.209243
EFEMP1	ADAMTS5	Protein	Protein	Within	0.00373122	-0.181978	down	0.181978	0.208864	up	0.208864
CAPG	CCL18	Protein	Protein	Within	0.00297624	-0.18005	down	0.18005	0.206651	up	0.206651
B2M	MCL1	Protein	Protein	Within	0.0173615	-0.179617	down	0.179617	0.206154	up	0.206154
EFEMP1	CFC1	Protein	Protein	Within	0.0289145	-0.179346	down	0.179346	0.205843	up	0.205843
NBL1	TNFRSF1A	Protein	Protein	Within	0.0493013	-0.179191	down	0.179191	0.205665	up	0.205665
GOT1	BMP7	Protein	Protein	Within	0.0180452	-0.178159	down	0.178159	0.20448	up	0.20448
F3	EFNA4	Protein	Protein	Within	0.0153176	-0.177941	down	0.177941	0.20423	up	0.20423
TDGF1	RELT	Protein	Protein	Within	0.00519329	-0.17648	down	0.17648	0.202553	up	0.202553
FSTL3	MMP7	Protein	Protein	Within	0.0313641	-0.176157	down	0.176157	0.202183	up	0.202183
RELT	CST5	Protein	Protein	Within	0.020156	-0.175749	down	0.175749	0.201714	up	0.201714
B2M	CHI3L1	Protein	Protein	Within	0.00510205	-0.175438	down	0.175438	0.201358	up	0.201358
B2M	ISG15	Protein	Protein	Within	0.0197378	-0.174545	down	0.174545	0.200333	up	0.200333
TFF3	MMP7	Protein	Protein	Within	0.00661074	-0.174403	down	0.174403	0.200169	up	0.200169
PTH	EFNA4	Protein	Protein	Within	0.0141742	-0.172567	down	0.172567	0.198063	up	0.198063
DCTN2	SCARF1	Protein	Protein	Within	0.00723574	-0.172363	down	0.172363	0.197828	up	0.197828
PRSS2	GDF15	Protein	Protein	Within	0.0261324	-0.171934	down	0.171934	0.197336	up	0.197336
CAPG	HSPA1A	Protein	Protein	Within	0.00900211	-0.169598	down	0.169598	0.194655	up	0.194655
EPHA2	MMP7	Protein	Protein	Within	0.0189556	-0.168897	down	0.168897	0.193851	up	0.193851
GDF15	TIMP1	Protein	Protein	Within	0.0254613	-0.168824	down	0.168824	0.193766	up	0.193766
BNP	LA area	Clinical Biomarker	Echo Imaging	Between	0.0148708	-0.167282	down	0.167282	0.191996	up	0.191996
TNFRSF1A	CST3	Protein	Protein	Within	0.0415743	-0.166876	down	0.166876	0.191531	up	0.191531
IGFBP2	ANP	Protein	Clinical Biomarker	Between	0.0056082	-0.166867	down	0.166867	0.19152	up	0.19152
DCTN2	NBL1	Protein	Protein	Within	0.0221067	-0.161627	down	0.161627	0.185506	up	0.185506
F3	IL15RA	Protein	Protein	Within	0.0255932	-0.161322	down	0.161322	0.185156	up	0.185156
PYY	EFNA4	Protein	Protein	Within	0.00983438	-0.158462	down	0.158462	0.181873	up	0.181873
TNFRSF4	IL15RA	Protein	Protein	Within	0.00490304	-0.158307	down	0.158307	0.181695	up	0.181695
CD84	BMP10	Protein	Protein	Within	0.00720185	-0.158284	down	0.158284	0.181669	up	0.181669
TFF3	PIANP	Protein	Protein	Within	0.0470053	-0.156403	down	0.156403	0.17951	up	0.17951
TNFRSF1A	EFNA4	Protein	Protein	Within	0.0388142	-0.155361	down	0.155361	0.178315	up	0.178315
B2M	IL12B IL23A	Protein	Protein	Within	0.0136098	-0.153583	down	0.153583	0.176273	up	0.176273
PTH	E/e'	Protein	Echo Imaging	Between	0.0137351	-0.153561	down	0.153561	0.176248	up	0.176248
MMP12	GDF15	Protein	Protein	Within	0.00893166	-0.153431	down	0.153431	0.176099	up	0.176099
BNP	ANP	Clinical Biomarker	Clinical Biomarker	Within	0.205242	-0.152223	down	0.152223	0.174713	up	0.174713
RSPO4	MMP12	Protein	Protein	Within	0.0391338	-0.152161	down	0.152161	0.174642	up	0.174642
PTH	DSC2	Protein	Protein	Within	0.0333346	-0.151804	down	0.151804	0.174232	up	0.174232
RELT	IGFBP6	Protein	Protein	Within	0.0246752	-0.151374	down	0.151374	0.173738	up	0.173738
FABP3	GDF15	Protein	Protein	Within	0.0356575	-0.148532	down	0.148532	0.170477	up	0.170477
CAPG	PLAUR	Protein	Protein	Within	0.0148454	-0.148407	down	0.148407	0.170333	up	0.170333
CKB CKM	EGFR	Protein	Protein	Within	0.0319308	0.14815	up	0.14815	-0.170038	down	0.170038
TNFRSF4	CST3	Protein	Protein	Within	0.00945445	-0.147578	down	0.147578	0.169381	up	0.169381
SHC1	SCARF1	Protein	Protein	Within	0.0748088	-0.145514	down	0.145514	0.167013	up	0.167013
PLG	CPB2	Protein	Protein	Within	0.104804	0.144671	up	0.144671	-0.166045	down	0.166045
ASGR1	IL1RN	Protein	Protein	Within	0.0159974	-0.144532	down	0.144532	0.165885	up	0.165885
F3	DSC2	Protein	Protein	Within	0.00869926	-0.143179	down	0.143179	0.164333	up	0.164333
TFF3	EDA2R	Protein	Protein	Within	0.00431115	-0.142907	down	0.142907	0.16402	up	0.16402
ASGR1	SEMA6B	Protein	Protein	Within	0.00227847	-0.142064	down	0.142064	0.163053	up	0.163053
ENTPD5	PLG	Protein	Protein	Within	0.0757508	0.139602	up	0.139602	-0.160227	down	0.160227
EFEMP1	VWF	Protein	Protein	Within	0.00952567	-0.139521	down	0.139521	0.160134	up	0.160134
EPHB2	CAPG	Protein	Protein	Within	0.0235744	-0.13881	down	0.13881	0.159318	up	0.159318
GOT1	GPD1	Protein	Protein	Within	0.0496498	-0.138351	down	0.138351	0.158791	up	0.158791
PYY	DSC2	Protein	Protein	Within	0.0121539	-0.136441	down	0.136441	0.156599	up	0.156599
PLG	GHR	Protein	Protein	Within	0.00527445	0.136118	up	0.136118	-0.156228	down	0.156228
ANP	LVMi	Clinical Biomarker	Echo Imaging	Between	0.017034	-0.134982	down	0.134982	0.154924	up	0.154924
KDR	LTF	Protein	Protein	Within	0.00714024	0.133413	up	0.133413	-0.153124	down	0.153124
PRLR	EPHA2	Protein	Protein	Within	0.0156868	-0.132825	down	0.132825	0.152449	up	0.152449
NBL1	SECTM1	Protein	Protein	Within	0.00474487	-0.131811	down	0.131811	0.151285	up	0.151285
EFNA4	SECTM1	Protein	Protein	Within	0.0181142	-0.131175	down	0.131175	0.150555	up	0.150555
IL15RA	TNFRSF1A	Protein	Protein	Within	0.0332209	-0.130033	down	0.130033	0.149244	up	0.149244
IL15RA	SECTM1	Protein	Protein	Within	0.00439925	-0.127844	down	0.127844	0.146732	up	0.146732
THBS2	E/e'	Protein	Echo Imaging	Between	0.0320353	-0.121378	down	0.121378	0.139311	up	0.139311
PTH	CST3	Protein	Protein	Within	0.0419237	-0.117428	down	0.117428	0.134777	up	0.134777
ASGR1	IGFBP4	Protein	Protein	Within	0.0101332	-0.1172	down	0.1172	0.134516	up	0.134516
EFEMP1	CHRDL1	Protein	Protein	Within	0.0267002	-0.114624	down	0.114624	0.131558	up	0.131558
DCTPP1	BMP10	Protein	Protein	Within	0.00763832	-0.11424	down	0.11424	0.131118	up	0.131118
GDF15	CCL15	Protein	Protein	Within	0.0322097	-0.112728	down	0.112728	0.129383	up	0.129383
CST1	DSC2	Protein	Protein	Within	0.0210023	-0.112285	down	0.112285	0.128874	up	0.128874
IGFBP2	NT-proBNP	Protein	Clinical Biomarker	Between	0.0265907	-0.111088	down	0.111088	0.127501	up	0.127501
HINT1	LCMT1	Protein	Protein	Within	0.0653521	-0.111043	down	0.111043	0.127449	up	0.127449
SCARF1	TNFRSF1A	Protein	Protein	Within	0.0578147	-0.1101	down	0.1101	0.126367	up	0.126367
RELT	JAM2	Protein	Protein	Within	0.0285151	-0.109196	down	0.109196	0.125329	up	0.125329
CD300C	FSTL3	Protein	Protein	Within	0.00654633	-0.106639	down	0.106639	0.122394	up	0.122394
RELT	MICB	Protein	Protein	Within	0.0176888	-0.105492	down	0.105492	0.121078	up	0.121078
PI3	TNFRSF1A	Protein	Protein	Within	0.00150684	-0.103465	down	0.103465	0.118751	up	0.118751
GDF15	NT-proANP	Protein	Clinical Biomarker	Between	0.0295071	-0.101839	down	0.101839	0.116885	up	0.116885
UNC5D	EPHA2	Protein	Protein	Within	0.00343066	-0.100696	down	0.100696	0.115573	up	0.115573
IL15RA	SMOC1	Protein	Protein	Within	0.0131028	-0.0999524	down	0.0999524	0.11472	up	0.11472
CST3	SMOC1	Protein	Protein	Within	0.0371917	-0.0991274	down	0.0991274	0.113773	up	0.113773
CNDP1	EGFR	Protein	Protein	Within	0.00559217	0.0991216	up	0.0991216	-0.113766	down	0.113766
IGFBP2	TIMP1	Protein	Protein	Within	0.0375191	-0.0958659	down	0.0958659	0.110029	up	0.110029
FAP	CDON	Protein	Protein	Within	0.0473565	0.093856	up	0.093856	-0.107722	down	0.107722
TNFRSF4	FIGF	Protein	Protein	Within	0.0207587	-0.0934301	down	0.0934301	0.107234	up	0.107234
PI3	SECTM1	Protein	Protein	Within	0.00530654	-0.0933471	down	0.0933471	0.107138	up	0.107138
CKB CKM	ADAMTS13	Protein	Protein	Within	0.0125529	0.0914998	up	0.0914998	-0.105018	down	0.105018
MAP2K4	NTRK2	Protein	Protein	Within	0.0189263	0.0912664	up	0.0912664	-0.10475	down	0.10475
CST3	CD59	Protein	Protein	Within	0.0164907	-0.0899916	down	0.0899916	0.103287	up	0.103287
TNFRSF19	EPHA2	Protein	Protein	Within	0.0124585	-0.0886037	down	0.0886037	0.101694	up	0.101694
DSC2	SECTM1	Protein	Protein	Within	0.105799	-0.0869214	down	0.0869214	0.0997634	up	0.0997634
NUDCD3	NBL1	Protein	Protein	Within	0.0208818	-0.0835035	down	0.0835035	0.0958405	up	0.0958405
MMP10	ASGR1	Protein	Protein	Within	0.0355764	-0.0827259	down	0.0827259	0.094948	up	0.094948
DSC2	REG4	Protein	Protein	Within	0.0667553	-0.0819088	down	0.0819088	0.0940102	up	0.0940102
FIGF	SECTM1	Protein	Protein	Within	0.00298106	-0.0813979	down	0.0813979	0.0934238	up	0.0934238
TNFRSF19	TFF3	Protein	Protein	Within	0.0042768	-0.0813062	down	0.0813062	0.0933185	up	0.0933185
FIGF	RSPO3	Protein	Protein	Within	0.00769729	-0.0804345	down	0.0804345	0.092318	up	0.092318
IL1RN	GOT1	Protein	Protein	Within	0.000541413	-0.0791649	down	0.0791649	0.0908608	up	0.0908608
AMH	PLG	Protein	Protein	Within	0.0030686	0.0788211	up	0.0788211	-0.0904663	down	0.0904663
PI3	IL22	Protein	Protein	Within	0.0946912	-0.0780122	down	0.0780122	0.0895378	up	0.0895378
IGFBP2	MMP12	Protein	Protein	Within	0.00184092	-0.0777425	down	0.0777425	0.0892283	up	0.0892283
IL15RA	CD59	Protein	Protein	Within	0.006563	-0.075637	down	0.075637	0.0868117	up	0.0868117
TNFSF15	NBL1	Protein	Protein	Within	0.0734679	-0.074839	down	0.074839	0.0858959	up	0.0858959
GDF15	CXCL8	Protein	Protein	Within	0.0174423	-0.0744467	down	0.0744467	0.0854456	up	0.0854456
EFNA4	CD59	Protein	Protein	Within	0.0767816	-0.0735864	down	0.0735864	0.0844582	up	0.0844582
CRK	NBL1	Protein	Protein	Within	0.0109576	-0.0733543	down	0.0733543	0.0841918	up	0.0841918
PLG	PLG	Protein	Protein	Within	0.398639	0.072967	up	0.072967	-0.0837473	down	0.0837473
TNFRSF18	ASGR1	Protein	Protein	Within	0.00359999	-0.072593	down	0.072593	0.083318	up	0.083318
B2M	AcylCarnitine 12:0	Protein	Lipid	Between	0.00204397	-0.0725852	down	0.0725852	0.0833091	up	0.0833091
EFEMP1	TIMP2	Protein	Protein	Within	0.0211638	-0.0700664	down	0.0700664	0.0804181	up	0.0804181
SCARF1	SMOC1	Protein	Protein	Within	0.0185304	-0.0690157	down	0.0690157	0.0792122	up	0.0792122
TFF3	PE 37:4	Protein	Lipid	Between	0.0163697	-0.0678539	down	0.0678539	0.0778788	up	0.0778788
TNFRSF4	TNFRSF1A	Protein	Protein	Within	0.022757	-0.0678527	down	0.0678527	0.0778773	up	0.0778773
SPON1	E/e'	Protein	Echo Imaging	Between	0.0080528	-0.0659831	down	0.0659831	0.0757316	up	0.0757316
GOT1	EIF5	Protein	Protein	Within	0.0785595	-0.0631272	down	0.0631272	0.0724537	up	0.0724537
ASGR1	CD84	Protein	Protein	Within	0.0389054	-0.0624713	down	0.0624713	0.0717009	up	0.0717009
STC1	B2M	Protein	Protein	Within	0.00342386	-0.0624508	down	0.0624508	0.0716773	up	0.0716773
CKB CKM	CA6	Protein	Protein	Within	0.0135304	0.061972	up	0.061972	-0.0711278	down	0.0711278
FIGF	CD59	Protein	Protein	Within	0.00476163	-0.0614247	down	0.0614247	0.0704996	up	0.0704996
RBM39	BMP10	Protein	Protein	Within	0.0342017	-0.0609834	down	0.0609834	0.0699932	up	0.0699932
GDF15	PE 34:1	Protein	Lipid	Between	0.0109448	-0.0607488	down	0.0607488	0.0697239	up	0.0697239
SPON1	FIGF	Protein	Protein	Within	0.0304118	-0.0596482	down	0.0596482	0.0684608	up	0.0684608
F3	SECTM1	Protein	Protein	Within	0.00878607	-0.0592853	down	0.0592853	0.0680443	up	0.0680443
RELT	PIANP	Protein	Protein	Within	0.0311287	-0.0590274	down	0.0590274	0.0677483	up	0.0677483
EFEMP1	CAMK1	Protein	Protein	Within	-0.013941	-0.0588788	down	0.0588788	0.0675776	up	0.0675776
GHR	EGFR	Protein	Protein	Within	0.0115709	0.0588174	up	0.0588174	-0.0675072	down	0.0675072
DCTN2	TNFRSF1A	Protein	Protein	Within	0.062739	-0.0574746	down	0.0574746	0.065966	up	0.065966
CHGA	TFF3	Protein	Protein	Within	0.0191739	-0.0560553	down	0.0560553	0.064337	up	0.064337
IGFBP2	FGFR1	Protein	Protein	Within	0.0701494	-0.0560177	down	0.0560177	0.0642938	up	0.0642938
KDR	FCN2	Protein	Protein	Within	0.153778	0.0552532	up	0.0552532	-0.0634163	down	0.0634163
TFF2	NBL1	Protein	Protein	Within	0.0374544	-0.0546795	down	0.0546795	0.062758	up	0.062758
CDON	EGFR	Protein	Protein	Within	0.0295436	0.0529233	up	0.0529233	-0.0607423	down	0.0607423
LGALS9	TNFRSF4	Protein	Protein	Within	0.0135791	-0.05178	down	0.05178	0.0594301	up	0.0594301
S100A9	GOT1	Protein	Protein	Within	0.0153721	-0.0505654	down	0.0505654	0.0580361	up	0.0580361
MAP2K4	CNTN4	Protein	Protein	Within	0.00357384	0.0504066	up	0.0504066	-0.0578537	down	0.0578537
EPHA2	SPP1	Protein	Protein	Within	0.0556153	-0.0476973	down	0.0476973	0.0547442	up	0.0547442
TNFRSF21	EPHA2	Protein	Protein	Within	0.00873262	-0.0475973	down	0.0475973	0.0546294	up	0.0546294
RSPO4	NT-proBNP	Protein	Clinical Biomarker	Between	0.0312094	-0.047516	down	0.047516	0.0545361	up	0.0545361
EFEMP1	CA3	Protein	Protein	Within	0.024782	-0.0471462	down	0.0471462	0.0541116	up	0.0541116
ASGR1	IL2	Protein	Protein	Within	0.00989426	-0.0471332	down	0.0471332	0.0540967	up	0.0540967
DCTN2	TNNT2	Protein	Protein	Within	0.00331267	-0.044997	down	0.044997	0.0516449	up	0.0516449
PLG	ECE1	Protein	Protein	Within	0.10205	0.0446185	up	0.0446185	-0.0512106	down	0.0512106
EPO	ASGR1	Protein	Protein	Within	0.00169449	-0.0438128	down	0.0438128	0.0502858	up	0.0502858
PI3	CD59	Protein	Protein	Within	0.0241946	-0.0426484	down	0.0426484	0.0489493	up	0.0489493
TNNT2	TNFRSF1A	Protein	Protein	Within	0.0388236	-0.0422355	down	0.0422355	0.0484754	up	0.0484754
FGF23	NBL1	Protein	Protein	Within	0.0136007	-0.0412677	down	0.0412677	0.0473646	up	0.0473646
SCARF1	MMP1	Protein	Protein	Within	0.0528223	-0.0404569	down	0.0404569	0.046434	up	0.046434
DSC2	CD59	Protein	Protein	Within	0.0697155	-0.0389586	down	0.0389586	0.0447144	up	0.0447144
NRXN1	TFF3	Protein	Protein	Within	0.00787221	-0.0370255	down	0.0370255	0.0424957	up	0.0424957
TNFRSF1A	SECTM1	Protein	Protein	Within	0.02677	-0.0352282	down	0.0352282	0.0404329	up	0.0404329
PLG	IL22	Protein	Protein	Within	-0.00489301	0.0351877	up	0.0351877	-0.0403864	down	0.0403864
FABP3	CST3	Protein	Protein	Within	0.0203779	-0.0350918	down	0.0350918	0.0402763	up	0.0402763
IL17RC	EFNA4	Protein	Protein	Within	0.0144468	-0.0329482	down	0.0329482	0.0378161	up	0.0378161
KDR	ACP5	Protein	Protein	Within	0.0210206	0.0318513	up	0.0318513	-0.036557	down	0.036557
IGFBP2	UNC5C	Protein	Protein	Within	0.00562883	-0.0317393	down	0.0317393	0.0364285	up	0.0364285
TFF3	VEGFA	Protein	Protein	Within	0.01251	-0.027456	down	0.027456	0.0315124	up	0.0315124
NOTCH1	EGFR	Protein	Protein	Within	0.103465	0.02686	up	0.02686	-0.0308283	down	0.0308283
CSRP3	NBL1	Protein	Protein	Within	0.0427044	-0.0263773	down	0.0263773	0.0302743	up	0.0302743
NRP1	TIMP1	Protein	Protein	Within	0.0278561	-0.0251491	down	0.0251491	0.0288647	up	0.0288647
MAP2K4	AHSG	Protein	Protein	Within	0.0270817	0.0246629	up	0.0246629	-0.0283067	down	0.0283067
BNP	LVIDSi	Clinical Biomarker	Echo Imaging	Between	0.0407183	-0.0240464	down	0.0240464	0.027599	up	0.027599
BMP10	VEGFA	Protein	Protein	Within	0.0232764	-0.0233043	down	0.0233043	0.0267473	up	0.0267473
DCTN2	CD59	Protein	Protein	Within	0.0534575	-0.0231233	down	0.0231233	0.0265395	up	0.0265395
IL15RA	TNFSF15	Protein	Protein	Within	0.0398144	-0.0227039	down	0.0227039	0.0260582	up	0.0260582
HAVCR2	NBL1	Protein	Protein	Within	0.00720295	-0.0193185	down	0.0193185	0.0221726	up	0.0221726
DCTN2	SMOC1	Protein	Protein	Within	0.0300848	-0.0191428	down	0.0191428	0.021971	up	0.021971
IL17RC	IL15RA	Protein	Protein	Within	0.00134394	-0.0185016	down	0.0185016	0.021235	up	0.021235
IGFBP2	NT-proANP	Protein	Clinical Biomarker	Between	0.0329517	-0.0177042	down	0.0177042	0.0203198	up	0.0203198
NBL1	EFNB1	Protein	Protein	Within	0.0606613	-0.0168067	down	0.0168067	0.0192897	up	0.0192897
ASGR1	RBM39	Protein	Protein	Within	0.00293366	-0.0167527	down	0.0167527	0.0192278	up	0.0192278
KDR	FLT4	Protein	Protein	Within	0.213508	0.0159076	up	0.0159076	-0.0182578	down	0.0182578
HAVCR2	EFNA4	Protein	Protein	Within	0.00484703	-0.0152116	down	0.0152116	0.017459	up	0.017459
TNNT2	RSPO3	Protein	Protein	Within	0.000679077	-0.0150686	down	0.0150686	0.0172948	up	0.0172948
CALR	BMP10	Protein	Protein	Within	0.019635	-0.0148185	down	0.0148185	0.0170079	up	0.0170079
EFEMP1	ROR1	Protein	Protein	Within	0.00316928	-0.0125746	down	0.0125746	0.0144324	up	0.0144324
FABP3	EFNA4	Protein	Protein	Within	0.00528578	-0.0107788	down	0.0107788	0.0123713	up	0.0123713
CD27	MAP2K4	Protein	Protein	Within	0.0710734	0.0107244	up	0.0107244	-0.0123089	down	0.0123089
TNFRSF1A	SMOC1	Protein	Protein	Within	0.0287016	-0.010689	down	0.010689	0.0122682	up	0.0122682
NSFL1C	TNFSF15	Protein	Protein	Within	0.00328058	-0.0105586	down	0.0105586	0.0121185	up	0.0121185
CST3	TIMP1	Protein	Protein	Within	0.0380746	-0.00956293	down	0.00956293	0.0109758	up	0.0109758
IL15RA	CD4	Protein	Protein	Within	0.0311571	-0.00819245	down	0.00819245	0.00940282	up	0.00940282
SPON1	THBS2	Protein	Protein	Within	0.0641107	-0.0079552	down	0.0079552	0.00913052	up	0.00913052
B2M	EDA2R	Protein	Protein	Within	0.046778	-0.00755554	down	0.00755554	0.00867181	up	0.00867181
BMP10	SPP1	Protein	Protein	Within	0.0432643	-0.007492	down	0.007492	0.00859889	up	0.00859889
LVMi	LA area	Echo Imaging	Echo Imaging	Within	0.0816034	-0.00689371	down	0.00689371	0.0079122	up	0.0079122
SOD2	EGFR	Protein	Protein	Within	0.0521932	0.00678367	up	0.00678367	-0.00778591	down	0.00778591
GDF15	LVESVi	Protein	Echo Imaging	Between	0.0211096	-0.00651824	down	0.00651824	0.00748125	up	0.00748125
KDR	BMP1	Protein	Protein	Within	0.0111194	0.00543655	up	0.00543655	-0.00623976	down	0.00623976
FSTL3	LCN2	Protein	Protein	Within	0.0185459	-0.00458919	down	0.00458919	0.0052672	up	0.0052672
HAVCR2	IL15RA	Protein	Protein	Within	0.0245316	-0.00433781	down	0.00433781	0.00497868	up	0.00497868
BNP	LVEF	Clinical Biomarker	Echo Imaging	Between	-0.052682	-0.00359918	down	0.00359918	0.00413093	up	0.00413093
FSTL3	FABP1	Protein	Protein	Within	0.00174742	-0.00289734	down	0.00289734	0.00332539	up	0.00332539
ASGR1	FCN1	Protein	Protein	Within	0.116674	-0.00289126	down	0.00289126	0.00331841	up	0.00331841
GDF15	CHI3L1	Protein	Protein	Within	0.0192636	-0.00227906	down	0.00227906	0.00261577	up	0.00261577
NRP1	FGFR1	Protein	Protein	Within	0.0443366	-0.001403	down	0.001403	0.00161028	up	0.00161028
MAP2K4	JAK2	Protein	Protein	Within	0.0288821	0.0010008	up	0.0010008	-0.00114866	down	0.00114866
TNFRSF1A	CD59	Protein	Protein	Within	0.0345488	-0.000534794	down	0.000534794	0.000613805	up	0.000613805
DLL4	NBL1	Protein	Protein	Within	0.0392463	-0.000184066	down	0.000184066	0.00021126	up	0.00021126

## Sheet: SuppTable5
type	ID	Description	GeneRatio	BgRatio	DEperc	Coverage	EnrichmentRatio	pvalue	geneID
Artery - Aorta	GO:0045664	regulation of neuron differentiation	10/103	20/675	0.0970874	0.0296296	3.2767	0.000221034	CNTN4/CALR/DLL1/B2M/TIMP2/FGFR1/BMP6/NBL1/NOTCH1/MED1
Artery - Aorta	GO:0071383	cellular response to steroid hormone stimulus	9/103	18/675	0.0873786	0.0266667	3.2767	0.000473412	JAK2/CALR/ANXA1/STC1/EGFR/SERPINF1/GSTP1/PARK7/MED1
Artery - Aorta	GO:0051241	negative regulation of multicellular organismal process	33/103	134/675	0.320388	0.198519	1.6139	0.000970684	EFEMP1/THBS2/INHBA/TIMP1/SPP1/GDF15/ANGPT2/JAK2/TNFRSF21/CALR/NRP1/FAP/ISG15/LGALS9/FCGR2B/EPHA2/ANXA1/DLL1/STC1/TNFRSF1B/PLAUR/B2M/CST3/TNFRSF1A/EGFR/SERPINF1/GSTP1/JAM2/NOTCH1/HAVCR2/FSTL3/DLL4/SEMA6B
Artery - Aorta	GO:0001654	eye development	12/103	32/675	0.116505	0.0474074	2.45752	0.00134324	EFEMP1/INHBA/NRP1/EPHA2/DLL1/SMOC1/VEGFA/SERPINF1/BMP6/CHRDL1/MED1/DLL4
Artery - Aorta	GO:0007423	sensory organ development	16/103	50/675	0.15534	0.0740741	2.09709	0.00153259	EFEMP1/INHBA/ROR1/NRP1/EPHA2/DLL1/SMOC1/VEGFA/EGFR/SERPINF1/BMP6/ECE1/NOTCH1/CHRDL1/MED1/DLL4
Artery - Aorta	GO:0030182	neuron differentiation	32/103	134/675	0.31068	0.198519	1.56499	0.00216942	CNTN4/INHBA/SPP1/ROR1/JAK2/TNFRSF21/CALR/NRP1/EPHA2/EPHB6/DLL1/VEGFA/S100A9/B2M/TIMP2/EGFR/FGFR1/SERPINF1/BMP6/EFNA4/EFNA5/NBL1/SCARF1/UNC5C/NOTCH1/EFNB1/MED1/DLL4/CAMK1/CRK/SEMA6B/SHC1
Artery - Aorta	GO:0048880	sensory system development	12/103	34/675	0.116505	0.0503704	2.31296	0.00248351	EFEMP1/INHBA/NRP1/EPHA2/DLL1/SMOC1/VEGFA/SERPINF1/BMP6/CHRDL1/MED1/DLL4
Artery - Aorta	GO:0150063	visual system development	12/103	34/675	0.116505	0.0503704	2.31296	0.00248351	EFEMP1/INHBA/NRP1/EPHA2/DLL1/SMOC1/VEGFA/SERPINF1/BMP6/CHRDL1/MED1/DLL4
Artery - Aorta	GO:0048545	response to steroid hormone	14/103	44/675	0.135922	0.0651852	2.08517	0.00331555	IGFBP2/SPP1/JAK2/CALR/ANXA1/STC1/GOT1/EGFR/SERPINF1/GSTP1/BMP6/NOTCH1/PARK7/MED1
Artery - Aorta	GO:0051048	negative regulation of secretion	7/103	15/675	0.0679612	0.0222222	3.05825	0.00355977	INHBA/LGALS9/FCGR2B/ANXA1/TNFRSF1B/TNFRSF1A/NOTCH1
Artery - Aorta	GO:1903531	negative regulation of secretion by cell	7/103	15/675	0.0679612	0.0222222	3.05825	0.00355977	INHBA/LGALS9/FCGR2B/ANXA1/TNFRSF1B/TNFRSF1A/NOTCH1
Artery - Aorta	GO:0022008	neurogenesis	36/103	161/675	0.349515	0.238519	1.46536	0.00382878	CNTN4/INHBA/SPP1/ROR1/JAK2/TNFRSF21/CALR/NRP1/EPHA2/ANXA1/EPHB6/DLL1/VEGFA/TNFRSF1B/S100A9/B2M/TIMP2/EGFR/CSF1/FGFR1/SERPINF1/GSTP1/BMP6/EFNA4/EFNA5/NBL1/SCARF1/UNC5C/NOTCH1/EFNB1/MED1/DLL4/CAMK1/CRK/SEMA6B/SHC1
Artery - Aorta	GO:0007399	nervous system development	42/103	197/675	0.407767	0.291852	1.39717	0.00417995	CNTN4/INHBA/SPP1/ROR1/JAK2/TNFRSF21/CALR/NRP1/FCGR2B/EPHA2/ANXA1/EPHB6/DLL1/VEGFA/TNFRSF1B/S100A9/B2M/CKB/TIMP2/EGFR/CSF1/FGFR1/SERPINF1/GSTP1/BMP6/EFNA4/EFNA5/NBL1/JAM2/SCARF1/UNC5C/NOTCH1/CAPG/EFNB1/CHRDL1/MED1/DLL4/CAMK1/PRKACA/CRK/SEMA6B/SHC1
Artery - Aorta	GO:0032870	cellular response to hormone stimulus	18/103	65/675	0.174757	0.0962963	1.81479	0.00482978	IGFBP2/INHBA/GDF15/GHR/JAK2/CALR/ANXA1/STC1/GOT1/EGFR/SERPINF1/GSTP1/NOTCH1/PARK7/MED1/PRKACA/CRK/SHC1
Artery - Aorta	GO:0045595	regulation of cell differentiation	39/103	181/675	0.378641	0.268148	1.41206	0.00511894	EFEMP1/CNTN4/INHBA/SPP1/CD4/SOD2/JAK2/TNFRSF21/CALR/NRP1/ISG15/LGALS9/FCGR2B/ANXA1/DLL1/SMOC1/VEGFA/TNFRSF1B/B2M/HSPA1A/TIMP2/TNFRSF1A/EGFR/CSF1/FGFR1/SERPINF1/KDR/BMP6/DDR2/EFNA5/NBL1/NOTCH1/FSTL3/MED1/DLL4/CAMK1/PRKACA/CRK/SEMA6B
Artery - Aorta	GO:0033273	response to vitamin	7/103	16/675	0.0679612	0.0237037	2.86711	0.00554054	SPP1/CD4/SOD2/STC1/EGFR/GSTP1/MED1
Artery - Aorta	GO:0048699	generation of neurons	33/103	147/675	0.320388	0.217778	1.47117	0.00566469	CNTN4/INHBA/SPP1/ROR1/JAK2/TNFRSF21/CALR/NRP1/EPHA2/EPHB6/DLL1/VEGFA/TNFRSF1B/S100A9/B2M/TIMP2/EGFR/FGFR1/SERPINF1/BMP6/EFNA4/EFNA5/NBL1/SCARF1/UNC5C/NOTCH1/EFNB1/MED1/DLL4/CAMK1/CRK/SEMA6B/SHC1
Artery - Aorta	GO:0032502	developmental process	74/103	409/675	0.718447	0.605926	1.1857	0.00685674	FABP3/IGFBP2/EFEMP1/BGN/CNTN4/THBS2/INHBA/TIMP1/SPP1/GDF15/CD4/SOD2/GHR/LYVE1/ANGPT2/ROR1/JAK2/TNFRSF21/CALR/EDA2R/NRP1/FAP/ISG15/LGALS9/FCGR2B/EPHA2/ANXA1/EPHB6/DLL1/SMOC1/VEGFA/STC1/TNFRSF1B/SECTM1/S100A9/F3/GOT1/B2M/CKB/HSPA1A/TIMP2/CST3/TNFRSF1A/EGFR/CSF1/FGFR1/SERPINF1/KDR/GSTP1/MCL1/BMP6/BMP1/ECE1/DDR2/EFNA4/EFNA5/NBL1/JAM2/SCARF1/UNC5C/NOTCH1/MAP2K4/HAVCR2/CAPG/EFNB1/FSTL3/CHRDL1/MED1/DLL4…
Artery - Aorta	GO:0060135	maternal process involved in female pregnancy	6/103	13/675	0.0582524	0.0192593	3.02465	0.00758457	SPP1/ANGPT2/LGALS9/STC1/HAVCR2/MED1
Artery - Aorta	GO:0007498	mesoderm development	6/103	13/675	0.0582524	0.0192593	3.02465	0.00758457	INHBA/JAK2/EPHA2/VEGFA/SECTM1/PRKACA
Artery - Aorta	GO:2000241	regulation of reproductive process	6/103	13/675	0.0582524	0.0192593	3.02465	0.00758457	INHBA/TIMP1/CALR/VEGFA/SERPINF1/NOTCH1
Artery - Aorta	GO:0002042	cell migration involved in sprouting angiogenesis	6/103	13/675	0.0582524	0.0192593	3.02465	0.00758457	NRP1/ANXA1/VEGFA/KDR/NOTCH1/DLL4
Artery - Aorta	GO:0043010	camera-type eye development	9/103	25/675	0.0873786	0.037037	2.35922	0.0077213	EFEMP1/INHBA/NRP1/EPHA2/DLL1/VEGFA/SERPINF1/MED1/DLL4
Artery - Aorta	GO:0003158	endothelium development	9/103	25/675	0.0873786	0.037037	2.35922	0.0077213	NRP1/DLL1/VEGFA/STC1/TNFRSF1A/KDR/BMP6/NOTCH1/DLL4
Artery - Aorta	GO:0030154	cell differentiation	60/103	316/675	0.582524	0.468148	1.24432	0.00778129	FABP3/EFEMP1/CNTN4/INHBA/SPP1/GDF15/CD4/SOD2/ANGPT2/ROR1/JAK2/TNFRSF21/CALR/EDA2R/NRP1/ISG15/LGALS9/FCGR2B/EPHA2/ANXA1/EPHB6/DLL1/SMOC1/VEGFA/STC1/TNFRSF1B/S100A9/GOT1/B2M/HSPA1A/TIMP2/TNFRSF1A/EGFR/CSF1/FGFR1/SERPINF1/KDR/GSTP1/MCL1/BMP6/BMP1/DDR2/EFNA4/EFNA5/NBL1/JAM2/SCARF1/UNC5C/NOTCH1/MAP2K4/EFNB1/FSTL3/CHRDL1/MED1/DLL4/CAMK1/PRKACA/CRK/SEMA6B/SHC1
Artery - Aorta	GO:0048856	anatomical structure development	70/103	384/675	0.679612	0.568889	1.19463	0.00866018	EFEMP1/BGN/CNTN4/THBS2/INHBA/TIMP1/SPP1/GDF15/CD4/SOD2/LYVE1/ANGPT2/ROR1/JAK2/TNFRSF21/CALR/EDA2R/NRP1/FAP/ISG15/LGALS9/FCGR2B/EPHA2/ANXA1/EPHB6/DLL1/SMOC1/VEGFA/STC1/TNFRSF1B/SECTM1/S100A9/F3/B2M/CKB/HSPA1A/TIMP2/CST3/TNFRSF1A/EGFR/CSF1/FGFR1/SERPINF1/KDR/GSTP1/MCL1/BMP6/BMP1/ECE1/DDR2/EFNA4/EFNA5/NBL1/JAM2/SCARF1/UNC5C/NOTCH1/MAP2K4/HAVCR2/CAPG/EFNB1/FSTL3/CHRDL1/MED1/DLL4/CAMK1/PRKACA/CRK/SEMA…
Artery - Aorta	GO:0007565	female pregnancy	10/103	30/675	0.0970874	0.0444444	2.18447	0.00924785	IGFBP2/TIMP1/SPP1/ANGPT2/CALR/LGALS9/VEGFA/STC1/HAVCR2/MED1
Artery - Aorta	GO:0048869	cellular developmental process	60/103	318/675	0.582524	0.471111	1.23649	0.00930515	FABP3/EFEMP1/CNTN4/INHBA/SPP1/GDF15/CD4/SOD2/ANGPT2/ROR1/JAK2/TNFRSF21/CALR/EDA2R/NRP1/ISG15/LGALS9/FCGR2B/EPHA2/ANXA1/EPHB6/DLL1/SMOC1/VEGFA/STC1/TNFRSF1B/S100A9/GOT1/B2M/HSPA1A/TIMP2/TNFRSF1A/EGFR/CSF1/FGFR1/SERPINF1/KDR/GSTP1/MCL1/BMP6/BMP1/DDR2/EFNA4/EFNA5/NBL1/JAM2/SCARF1/UNC5C/NOTCH1/MAP2K4/EFNB1/FSTL3/CHRDL1/MED1/DLL4/CAMK1/PRKACA/CRK/SEMA6B/SHC1
Artery - Aorta	GO:0051093	negative regulation of developmental process	23/103	96/675	0.223301	0.142222	1.57008	0.0104306	EFEMP1/CNTN4/THBS2/INHBA/SPP1/GDF15/ANGPT2/CALR/NRP1/FCGR2B/EPHA2/ANXA1/DLL1/VEGFA/B2M/CST3/EGFR/SERPINF1/EFNA5/NOTCH1/FSTL3/MED1/SEMA6B
Artery - Aorta	GO:0050793	regulation of developmental process	50/103	256/675	0.485437	0.379259	1.27996	0.0112359	EFEMP1/CNTN4/THBS2/INHBA/SPP1/GDF15/CD4/SOD2/GHR/ANGPT2/ROR1/JAK2/TNFRSF21/CALR/NRP1/ISG15/LGALS9/FCGR2B/EPHA2/ANXA1/DLL1/SMOC1/VEGFA/TNFRSF1B/F3/B2M/HSPA1A/TIMP2/CST3/TNFRSF1A/EGFR/CSF1/FGFR1/SERPINF1/KDR/BMP6/BMP1/DDR2/EFNA5/NBL1/JAM2/SCARF1/NOTCH1/FSTL3/MED1/DLL4/CAMK1/PRKACA/CRK/SEMA6B
Artery - Aorta	GO:0032501	multicellular organismal process	79/103	450/675	0.76699	0.666667	1.15049	0.0114035	IGFBP2/EFEMP1/BGN/CNTN4/THBS2/INHBA/TIMP1/SPP1/GDF15/CD4/SOD2/GHR/ANGPT2/ROR1/JAK2/TNFRSF21/CALR/EDA2R/NRP1/FAP/ENO1/ISG15/LGALS9/FCGR2B/EPHA2/ANXA1/PRSS2/EPHB6/DLL1/IGHA1/SMOC1/VEGFA/STC1/TNFRSF1B/PLAUR/S100A9/VWF/F3/B2M/CKB/HSPA1A/TIMP2/CST3/TNFRSF1A/EGFR/CSF1/FGFR1/SERPINF1/KDR/GSTP1/MCL1/BMP6/BMP1/ECE1/DDR2/EFNA4/EFNA5/CD59/NBL1/JAM2/SCARF1/UNC5C/NOTCH1/MAP2K4/HAVCR2/CAPG/EFNB1/PARK7/FSTL3/CH…
Artery - Aorta	GO:0050922	negative regulation of chemotaxis	6/103	14/675	0.0582524	0.0207407	2.8086	0.0116462	ANGPT2/NRP1/GSTP1/NBL1/NOTCH1/SEMA6B
Artery - Aorta	GO:0022617	extracellular matrix disassembly	7/103	18/675	0.0679612	0.0266667	2.54854	0.011822	TIMP1/FAP/PRSS2/TIMP2/CST3/BMP1/DDR2
Artery - Aorta	GO:0097193	intrinsic apoptotic signaling pathway	14/103	50/675	0.135922	0.0740741	1.83495	0.0119157	SOD2/JAK2/EDA2R/ENO1/EPHA2/TNFRSF1B/PLAUR/S100A9/HSPA1A/TNFRSF1A/MCL1/PARK7/HINT1/TXNDC12
Artery - Aorta	GO:0044706	multi-multicellular organism process	10/103	31/675	0.0970874	0.0459259	2.114	0.0119232	IGFBP2/TIMP1/SPP1/ANGPT2/CALR/LGALS9/VEGFA/STC1/HAVCR2/MED1
Artery - Aorta	GO:0032102	negative regulation of response to external stimulus	16/103	61/675	0.15534	0.0903704	1.71892	0.0140472	SPP1/ANGPT2/NRP1/FAP/LGALS9/FCGR2B/TNFRSF1B/PLAUR/TNFRSF1A/SERPINF1/GSTP1/NBL1/NOTCH1/HAVCR2/CRK/SEMA6B
Artery - Aorta	GO:0007275	multicellular organism development	66/103	363/675	0.640777	0.537778	1.19153	0.0145454	EFEMP1/BGN/CNTN4/THBS2/INHBA/TIMP1/SPP1/CD4/SOD2/ANGPT2/ROR1/JAK2/TNFRSF21/CALR/EDA2R/NRP1/FAP/ISG15/LGALS9/FCGR2B/EPHA2/ANXA1/EPHB6/DLL1/SMOC1/VEGFA/STC1/TNFRSF1B/S100A9/F3/B2M/CKB/HSPA1A/TIMP2/TNFRSF1A/EGFR/CSF1/FGFR1/SERPINF1/KDR/GSTP1/MCL1/BMP6/BMP1/ECE1/DDR2/EFNA4/EFNA5/NBL1/JAM2/SCARF1/UNC5C/NOTCH1/MAP2K4/HAVCR2/CAPG/EFNB1/FSTL3/CHRDL1/MED1/DLL4/CAMK1/PRKACA/CRK/SEMA6B/SHC1
Artery - Aorta	GO:0045446	endothelial cell differentiation	8/103	23/675	0.0776699	0.0340741	2.27944	0.015094	NRP1/DLL1/VEGFA/STC1/TNFRSF1A/KDR/BMP6/NOTCH1
Artery - Aorta	GO:0030030	cell projection organization	29/103	133/675	0.281553	0.197037	1.42894	0.0158481	CNTN4/SPP1/ROR1/JAK2/TNFRSF21/NRP1/FCGR2B/EPHA2/EPHB6/VEGFA/S100A9/B2M/EGFR/SERPINF1/EFNA4/EFNA5/NBL1/SCARF1/UNC5C/NOTCH1/CAPG/EFNB1/DCTN2/CAMK1/PRKACA/NUDCD3/CRK/SEMA6B/SHC1
Artery - Aorta	GO:0001909	leukocyte mediated cytotoxicity	5/103	11/675	0.0485437	0.0162963	2.97882	0.0162135	LGALS9/FCGR2B/B2M/HAVCR2/CRK
Artery - Aorta	GO:0045646	regulation of erythrocyte differentiation	5/103	11/675	0.0485437	0.0162963	2.97882	0.0162135	INHBA/ISG15/B2M/HSPA1A/MED1
Artery - Aorta	GO:0048872	homeostasis of number of cells	11/103	37/675	0.106796	0.0548148	1.94831	0.0162136	INHBA/JAK2/ISG15/LGALS9/ANXA1/VEGFA/B2M/HSPA1A/CSF1/NOTCH1/MED1
Artery - Aorta	GO:0048731	system development	64/103	351/675	0.621359	0.52	1.19492	0.0162721	EFEMP1/BGN/CNTN4/THBS2/INHBA/TIMP1/SPP1/CD4/SOD2/ANGPT2/ROR1/JAK2/TNFRSF21/CALR/NRP1/FAP/ISG15/LGALS9/FCGR2B/EPHA2/ANXA1/EPHB6/DLL1/SMOC1/VEGFA/STC1/TNFRSF1B/S100A9/F3/B2M/CKB/HSPA1A/TIMP2/TNFRSF1A/EGFR/CSF1/FGFR1/SERPINF1/KDR/GSTP1/BMP6/BMP1/ECE1/DDR2/EFNA4/EFNA5/NBL1/JAM2/SCARF1/UNC5C/NOTCH1/MAP2K4/HAVCR2/CAPG/EFNB1/FSTL3/CHRDL1/MED1/DLL4/CAMK1/PRKACA/CRK/SEMA6B/SHC1
Artery - Aorta	GO:0030218	erythrocyte differentiation	7/103	19/675	0.0679612	0.0281481	2.41441	0.0163996	INHBA/JAK2/ISG15/VEGFA/B2M/HSPA1A/MED1
Artery - Aorta	GO:0034101	erythrocyte homeostasis	7/103	19/675	0.0679612	0.0281481	2.41441	0.0163996	INHBA/JAK2/ISG15/VEGFA/B2M/HSPA1A/MED1
Artery - Aorta	GO:0031341	regulation of cell killing	6/103	15/675	0.0582524	0.0222222	2.62136	0.0170372	LGALS9/FCGR2B/B2M/CD59/HAVCR2/CRK
Artery - Aorta	GO:1903053	regulation of extracellular matrix organization	6/103	15/675	0.0582524	0.0222222	2.62136	0.0170372	FAP/TNFRSF1B/CST3/TNFRSF1A/DDR2/NOTCH1
Artery - Aorta	GO:0031960	response to corticosteroid	9/103	28/675	0.0873786	0.0414815	2.10645	0.0174309	IGFBP2/ANXA1/STC1/GOT1/EGFR/SERPINF1/GSTP1/BMP6/NOTCH1
Artery - Aorta	GO:0045596	negative regulation of cell differentiation	17/103	68/675	0.165049	0.100741	1.63835	0.0186222	EFEMP1/CNTN4/INHBA/SPP1/CALR/NRP1/FCGR2B/ANXA1/DLL1/VEGFA/B2M/EGFR/EFNA5/NOTCH1/FSTL3/MED1/SEMA6B
Artery - Aorta	GO:0002262	myeloid cell homeostasis	8/103	24/675	0.0776699	0.0355556	2.18447	0.0198133	INHBA/JAK2/ISG15/ANXA1/VEGFA/B2M/HSPA1A/MED1
Artery - Aorta	GO:0010811	positive regulation of cell-substrate adhesion	8/103	24/675	0.0776699	0.0355556	2.18447	0.0198133	JAK2/CALR/NRP1/CCDC80/VEGFA/CSF1/KDR/CRK
Artery - Aorta	GO:0051384	response to glucocorticoid	8/103	24/675	0.0776699	0.0355556	2.18447	0.0198133	IGFBP2/ANXA1/STC1/GOT1/EGFR/SERPINF1/GSTP1/BMP6
Artery - Aorta	GO:0007167	enzyme linked receptor protein signaling pathway	34/103	166/675	0.330097	0.245926	1.34226	0.0231574	IGFBP2/EFEMP1/INHBA/GDF15/CD4/GHR/ANGPT2/JAK2/NRP1/EPHA2/IGFBP6/EPHB6/DLL1/VEGFA/PLAUR/F3/GOT1/HSPA1A/EGFR/CSF1/FGFR1/KDR/BMP6/DDR2/EFNA4/EFNA5/NBL1/IGFBP4/NOTCH1/EFNB1/FSTL3/CHRDL1/CRK/SHC1
Artery - Aorta	GO:0120036	plasma membrane bounded cell projection organization	28/103	131/675	0.271845	0.194074	1.40073	0.0236788	CNTN4/SPP1/ROR1/JAK2/TNFRSF21/NRP1/FCGR2B/EPHA2/EPHB6/VEGFA/S100A9/B2M/EGFR/SERPINF1/EFNA4/EFNA5/NBL1/SCARF1/UNC5C/NOTCH1/EFNB1/DCTN2/CAMK1/PRKACA/NUDCD3/CRK/SEMA6B/SHC1
Artery - Aorta	GO:0007411	axon guidance	12/103	44/675	0.116505	0.0651852	1.78729	0.024456	CNTN4/NRP1/EPHA2/EPHB6/VEGFA/EFNA4/EFNA5/UNC5C/NOTCH1/EFNB1/SEMA6B/SHC1
Artery - Aorta	GO:0097485	neuron projection guidance	12/103	44/675	0.116505	0.0651852	1.78729	0.024456	CNTN4/NRP1/EPHA2/EPHB6/VEGFA/EFNA4/EFNA5/UNC5C/NOTCH1/EFNB1/SEMA6B/SHC1
Artery - Aorta	GO:0010594	regulation of endothelial cell migration	12/103	44/675	0.116505	0.0651852	1.78729	0.024456	ANGPT2/CALR/NRP1/EPHA2/ANXA1/VEGFA/STC1/FGFR1/SERPINF1/KDR/NOTCH1/DLL4
Artery - Aorta	GO:0010596	negative regulation of endothelial cell migration	5/103	12/675	0.0485437	0.0177778	2.73058	0.0244689	ANGPT2/STC1/SERPINF1/NOTCH1/DLL4
Artery - Aorta	GO:0045229	external encapsulating structure organization	17/103	70/675	0.165049	0.103704	1.59154	0.0248143	BGN/TIMP1/SPP1/CCDC80/FAP/PRSS2/SMOC1/TNFRSF1B/VWF/TIMP2/CST3/TNFRSF1A/KDR/BMP1/DDR2/JAM2/NOTCH1
Artery - Aorta	GO:0030198	extracellular matrix organization	17/103	70/675	0.165049	0.103704	1.59154	0.0248143	BGN/TIMP1/SPP1/CCDC80/FAP/PRSS2/SMOC1/TNFRSF1B/VWF/TIMP2/CST3/TNFRSF1A/KDR/BMP1/DDR2/JAM2/NOTCH1
Artery - Aorta	GO:0043062	extracellular structure organization	17/103	70/675	0.165049	0.103704	1.59154	0.0248143	BGN/TIMP1/SPP1/CCDC80/FAP/PRSS2/SMOC1/TNFRSF1B/VWF/TIMP2/CST3/TNFRSF1A/KDR/BMP1/DDR2/JAM2/NOTCH1
Artery - Aorta	GO:0007584	response to nutrient	8/103	25/675	0.0776699	0.037037	2.09709	0.0255037	IGFBP2/SPP1/CD4/SOD2/STC1/EGFR/GSTP1/MED1
Artery - Aorta	GO:0002040	sprouting angiogenesis	8/103	25/675	0.0776699	0.037037	2.09709	0.0255037	NRP1/EPHA2/ANXA1/DLL1/VEGFA/KDR/NOTCH1/DLL4
Artery - Aorta	GO:0043534	blood vessel endothelial cell migration	9/103	30/675	0.0873786	0.0444444	1.96602	0.0276051	ANGPT2/NRP1/EPHA2/ANXA1/VEGFA/FGFR1/KDR/NOTCH1/DLL4
Artery - Aorta	GO:0007169	transmembrane receptor protein tyrosine kinase signaling pathway	26/103	121/675	0.252427	0.179259	1.40817	0.0277641	IGFBP2/EFEMP1/GDF15/CD4/GHR/ANGPT2/JAK2/NRP1/EPHA2/IGFBP6/EPHB6/DLL1/VEGFA/PLAUR/F3/EGFR/CSF1/FGFR1/KDR/DDR2/EFNA4/EFNA5/IGFBP4/EFNB1/CRK/SHC1
Artery - Aorta	GO:0048609	multicellular organismal reproductive process	14/103	55/675	0.135922	0.0814815	1.66814	0.02793	INHBA/SPP1/ANGPT2/CALR/LGALS9/STC1/EGFR/SERPINF1/JAM2/NOTCH1/HAVCR2/FSTL3/MED1/PRKACA
Artery - Aorta	GO:0031175	neuron projection development	24/103	110/675	0.23301	0.162963	1.42983	0.0290866	CNTN4/SPP1/ROR1/JAK2/TNFRSF21/NRP1/EPHA2/EPHB6/VEGFA/S100A9/B2M/EGFR/SERPINF1/EFNA4/EFNA5/NBL1/SCARF1/UNC5C/NOTCH1/EFNB1/CAMK1/CRK/SEMA6B/SHC1
Artery - Aorta	GO:0044703	multi-organism reproductive process	16/103	66/675	0.15534	0.0977778	1.5887	0.0298781	IGFBP2/INHBA/TIMP1/SPP1/ANGPT2/CALR/LGALS9/VEGFA/STC1/JAM2/NOTCH1/HAVCR2/PARK7/FSTL3/MED1/PRKACA
Artery - Aorta	GO:0042592	homeostatic process	32/103	157/675	0.31068	0.232593	1.33572	0.0303204	FABP3/INHBA/SPP1/CD4/SOD2/JAK2/CALR/ISG15/LGALS9/ANXA1/DLL1/IGHA1/VEGFA/STC1/S100A9/GOT1/B2M/CKB/HSPA1A/EGFR/CSF1/SERPINF1/KDR/GSTP1/MCL1/BMP6/EFNA5/JAM2/NOTCH1/PARK7/MED1/PRKACA
Artery - Aorta	GO:0043535	regulation of blood vessel endothelial cell migration	8/103	26/675	0.0776699	0.0385185	2.01643	0.0322519	ANGPT2/EPHA2/ANXA1/VEGFA/FGFR1/KDR/NOTCH1/DLL4
Artery - Aorta	GO:0032504	multicellular organism reproduction	14/103	56/675	0.135922	0.082963	1.63835	0.0324846	INHBA/SPP1/ANGPT2/CALR/LGALS9/STC1/EGFR/SERPINF1/JAM2/NOTCH1/HAVCR2/FSTL3/MED1/PRKACA
Artery - Aorta	GO:0030856	regulation of epithelial cell differentiation	6/103	17/675	0.0582524	0.0251852	2.31296	0.0324919	DLL1/VEGFA/TNFRSF1A/BMP6/NOTCH1/MED1
Artery - Aorta	GO:0002706	regulation of lymphocyte mediated immunity	6/103	17/675	0.0582524	0.0251852	2.31296	0.0324919	LGALS9/FCGR2B/TNFRSF1B/B2M/HAVCR2/CRK
Artery - Aorta	GO:0001818	negative regulation of cytokine production	10/103	36/675	0.0970874	0.0533333	1.82039	0.0347853	INHBA/TNFRSF21/ISG15/LGALS9/FCGR2B/EPHA2/ANXA1/DLL1/GSTP1/HAVCR2
Artery - Aorta	GO:0010817	regulation of hormone levels	11/103	41/675	0.106796	0.0607407	1.75823	0.0348355	INHBA/SPP1/GHR/JAK2/ANXA1/EGFR/BMP6/ECE1/EFNA5/PARK7/MED1
Artery - Aorta	GO:0021953	central nervous system neuron differentiation	5/103	13/675	0.0485437	0.0192593	2.52054	0.0350216	INHBA/EPHB6/B2M/DLL4/CRK
Artery - Aorta	GO:0007566	embryo implantation	5/103	13/675	0.0485437	0.0192593	2.52054	0.0350216	TIMP1/SPP1/CALR/VEGFA/STC1
Artery - Aorta	GO:0032637	interleukin-8 production	5/103	13/675	0.0485437	0.0192593	2.52054	0.0350216	LGALS9/ANXA1/F3/HSPA1A/PARK7
Artery - Aorta	GO:0032677	regulation of interleukin-8 production	5/103	13/675	0.0485437	0.0192593	2.52054	0.0350216	LGALS9/ANXA1/F3/HSPA1A/PARK7
Artery - Aorta	GO:2000026	regulation of multicellular organismal development	32/103	159/675	0.31068	0.235556	1.31892	0.0363066	EFEMP1/THBS2/INHBA/SPP1/CD4/ANGPT2/TNFRSF21/NRP1/ISG15/LGALS9/FCGR2B/EPHA2/ANXA1/DLL1/VEGFA/TNFRSF1B/F3/B2M/HSPA1A/TNFRSF1A/CSF1/SERPINF1/KDR/BMP6/BMP1/DDR2/JAM2/NOTCH1/FSTL3/MED1/DLL4/SEMA6B
Artery - Aorta	GO:0035924	cellular response to vascular endothelial growth factor stimulus	7/103	22/675	0.0679612	0.0325926	2.08517	0.0373913	NRP1/ANXA1/DLL1/VEGFA/KDR/NOTCH1/DLL4
Artery - Aorta	GO:0006935	chemotaxis	26/103	124/675	0.252427	0.183704	1.3741	0.0375809	CNTN4/ANGPT2/CALR/NRP1/LGALS9/EPHA2/ANXA1/EPHB6/VEGFA/PLAUR/S100A9/F3/CSF1/FGFR1/KDR/GSTP1/EFNA4/EFNA5/NBL1/UNC5C/NOTCH1/EFNB1/IL17RC/CRK/SEMA6B/SHC1
Artery - Aorta	GO:0042330	taxis	26/103	124/675	0.252427	0.183704	1.3741	0.0375809	CNTN4/ANGPT2/CALR/NRP1/LGALS9/EPHA2/ANXA1/EPHB6/VEGFA/PLAUR/S100A9/F3/CSF1/FGFR1/KDR/GSTP1/EFNA4/EFNA5/NBL1/UNC5C/NOTCH1/EFNB1/IL17RC/CRK/SEMA6B/SHC1
Artery - Aorta	GO:0051239	regulation of multicellular organismal process	50/103	271/675	0.485437	0.401481	1.20911	0.0383037	EFEMP1/THBS2/INHBA/TIMP1/SPP1/GDF15/CD4/GHR/ANGPT2/JAK2/TNFRSF21/CALR/NRP1/FAP/ENO1/ISG15/LGALS9/FCGR2B/EPHA2/ANXA1/DLL1/VEGFA/STC1/TNFRSF1B/PLAUR/F3/B2M/HSPA1A/CST3/TNFRSF1A/EGFR/CSF1/FGFR1/SERPINF1/KDR/GSTP1/BMP6/BMP1/ECE1/DDR2/JAM2/NOTCH1/HAVCR2/PARK7/FSTL3/MED1/DLL4/PRKACA/IL17RC/SEMA6B
Artery - Aorta	GO:0061564	axon development	16/103	68/675	0.15534	0.100741	1.54198	0.0390283	CNTN4/SPP1/JAK2/TNFRSF21/NRP1/EPHA2/EPHB6/VEGFA/EFNA4/EFNA5/SCARF1/UNC5C/NOTCH1/EFNB1/SEMA6B/SHC1
Artery - Aorta	GO:0051129	negative regulation of cellular component organization	16/103	68/675	0.15534	0.100741	1.54198	0.0390283	SPP1/NRP1/FAP/VEGFA/TNFRSF1B/B2M/HSPA1A/CST3/TNFRSF1A/BMP6/H1-2/NOTCH1/CAPG/PARK7/LCMT1/SEMA6B
Artery - Aorta	GO:0044057	regulation of system process	13/103	52/675	0.126214	0.077037	1.63835	0.0390429	INHBA/JAK2/TNFRSF21/ENO1/STC1/TNFRSF1B/TNFRSF1A/EGFR/BMP6/ECE1/JAM2/NOTCH1/PRKACA
Artery - Aorta	GO:0051094	positive regulation of developmental process	33/103	166/675	0.320388	0.245926	1.30278	0.0396201	INHBA/GDF15/CD4/SOD2/GHR/ANGPT2/JAK2/CALR/NRP1/ISG15/LGALS9/ANXA1/DLL1/VEGFA/TNFRSF1B/F3/B2M/HSPA1A/TIMP2/TNFRSF1A/CSF1/FGFR1/SERPINF1/KDR/BMP6/BMP1/DDR2/NBL1/SCARF1/NOTCH1/MED1/CAMK1/CRK
Artery - Aorta	GO:0048754	branching morphogenesis of an epithelial tube	8/103	27/675	0.0776699	0.04	1.94175	0.0401345	NRP1/EPHA2/VEGFA/CSF1/KDR/NOTCH1/MED1/DLL4
Artery - Aorta	GO:0048468	cell development	37/103	191/675	0.359223	0.282963	1.26951	0.0420943	CNTN4/SPP1/ANGPT2/ROR1/JAK2/TNFRSF21/CALR/NRP1/EPHA2/EPHB6/DLL1/VEGFA/STC1/TNFRSF1B/S100A9/B2M/TNFRSF1A/EGFR/SERPINF1/GSTP1/BMP6/EFNA4/EFNA5/NBL1/JAM2/SCARF1/UNC5C/NOTCH1/MAP2K4/EFNB1/MED1/DLL4/CAMK1/PRKACA/CRK/SEMA6B/SHC1
Artery - Aorta	GO:0045639	positive regulation of myeloid cell differentiation	6/103	18/675	0.0582524	0.0266667	2.18447	0.0428268	INHBA/CD4/ISG15/HSPA1A/CSF1/MED1
Artery - Aorta	GO:0035051	cardiocyte differentiation	6/103	18/675	0.0582524	0.0266667	2.18447	0.0428268	CALR/DLL1/VEGFA/EGFR/NOTCH1/MAP2K4
Artery - Aorta	GO:0048013	ephrin receptor signaling pathway	6/103	18/675	0.0582524	0.0266667	2.18447	0.0428268	EPHA2/EPHB6/EFNA4/EFNA5/EFNB1/CRK
Artery - Aorta	GO:0009725	response to hormone	23/103	108/675	0.223301	0.16	1.39563	0.0429021	FABP3/IGFBP2/INHBA/TIMP1/SPP1/GDF15/GHR/JAK2/CALR/ANXA1/STC1/GOT1/TIMP2/EGFR/SERPINF1/GSTP1/BMP6/NOTCH1/PARK7/MED1/PRKACA/CRK/SHC1
Artery - Aorta	GO:0043588	skin development	7/103	23/675	0.0679612	0.0340741	1.99451	0.0471463	INHBA/EPHA2/ANXA1/DLL1/EGFR/NOTCH1/MED1
Artery - Aorta	GO:0010633	negative regulation of epithelial cell migration	5/103	14/675	0.0485437	0.0207407	2.3405	0.0480079	ANGPT2/STC1/SERPINF1/NOTCH1/DLL4
Artery - Aorta	GO:0035767	endothelial cell chemotaxis	5/103	14/675	0.0485437	0.0207407	2.3405	0.0480079	NRP1/VEGFA/FGFR1/KDR/NOTCH1
Artery - Aorta	GO:0046887	positive regulation of hormone secretion	5/103	14/675	0.0485437	0.0207407	2.3405	0.0480079	INHBA/SPP1/JAK2/EGFR/BMP6
Artery - Aorta	GO:0060041	retina development in camera-type eye	5/103	14/675	0.0485437	0.0207407	2.3405	0.0480079	NRP1/DLL1/SERPINF1/MED1/DLL4
Artery - Aorta	GO:0051704	multi-organism process	18/103	81/675	0.174757	0.12	1.45631	0.0495326	IGFBP2/INHBA/TIMP1/SPP1/CD4/ANGPT2/CALR/LGALS9/VEGFA/STC1/BMP6/JAM2/NOTCH1/HAVCR2/PARK7/FSTL3/MED1/PRKACA
Artery - Coronary	GO:0045664	regulation of neuron differentiation	10/110	20/694	0.0909091	0.0288184	3.15455	0.000311179	CNTN4/CALR/DLL1/B2M/TIMP2/FGFR1/BMP6/NBL1/NOTCH1/MED1
Artery - Coronary	GO:0007423	sensory organ development	17/110	49/694	0.154545	0.0706052	2.18887	0.000595626	EFEMP1/INHBA/ROR1/NRP1/EPHA2/DLL1/SMOC1/VEGFA/EGFR/SERPINF1/BMP6/ECE1/NTRK2/NOTCH1/CHRDL1/MED1/DLL4
Artery - Coronary	GO:0071383	cellular response to steroid hormone stimulus	9/110	18/694	0.0818182	0.0259366	3.15455	0.000642894	JAK2/CALR/ANXA1/STC1/EGFR/SERPINF1/GSTP1/PARK7/MED1
Artery - Coronary	GO:0001654	eye development	13/110	33/694	0.118182	0.0475504	2.4854	0.000707062	EFEMP1/INHBA/NRP1/EPHA2/DLL1/SMOC1/VEGFA/SERPINF1/BMP6/NTRK2/CHRDL1/MED1/DLL4
Artery - Coronary	GO:0048880	sensory system development	13/110	35/694	0.118182	0.0504323	2.34338	0.0013681	EFEMP1/INHBA/NRP1/EPHA2/DLL1/SMOC1/VEGFA/SERPINF1/BMP6/NTRK2/CHRDL1/MED1/DLL4
Artery - Coronary	GO:0150063	visual system development	13/110	35/694	0.118182	0.0504323	2.34338	0.0013681	EFEMP1/INHBA/NRP1/EPHA2/DLL1/SMOC1/VEGFA/SERPINF1/BMP6/NTRK2/CHRDL1/MED1/DLL4
Artery - Coronary	GO:0030182	neuron differentiation	33/110	133/694	0.3	0.191643	1.56541	0.00187236	CNTN4/INHBA/SPP1/ROR1/JAK2/TNFRSF21/CALR/NRP1/EPHA2/EPHB6/DLL1/VEGFA/S100A9/B2M/TIMP2/EGFR/FGFR1/SERPINF1/BMP6/EFNA4/EFNA5/NTRK2/NBL1/SCARF1/UNC5C/NOTCH1/EFNB1/MED1/DLL4/CAMK1/CRK/SEMA6B/SHC1
Artery - Coronary	GO:0022008	neurogenesis	37/110	159/694	0.336364	0.229107	1.46815	0.00334752	CNTN4/INHBA/SPP1/ROR1/JAK2/TNFRSF21/CALR/NRP1/EPHA2/ANXA1/EPHB6/DLL1/VEGFA/TNFRSF1B/S100A9/B2M/TIMP2/EGFR/CSF1/FGFR1/SERPINF1/GSTP1/BMP6/EFNA4/EFNA5/NTRK2/NBL1/SCARF1/UNC5C/NOTCH1/EFNB1/MED1/DLL4/CAMK1/CRK/SEMA6B/SHC1
Artery - Coronary	GO:0051241	negative regulation of multicellular organismal process	32/110	132/694	0.290909	0.190202	1.52948	0.00346112	EFEMP1/THBS2/INHBA/TIMP1/SPP1/ANGPT2/JAK2/TNFRSF21/CALR/NRP1/FAP/ISG15/LGALS9/FCGR2B/EPHA2/ANXA1/DLL1/STC1/TNFRSF1B/PLAUR/B2M/CST3/TNFRSF1A/EGFR/SERPINF1/GSTP1/JAM2/NOTCH1/HAVCR2/FSTL3/DLL4/SEMA6B
Artery - Coronary	GO:0043010	camera-type eye development	10/110	26/694	0.0909091	0.037464	2.42657	0.00381004	EFEMP1/INHBA/NRP1/EPHA2/DLL1/VEGFA/SERPINF1/NTRK2/MED1/DLL4
Artery - Coronary	GO:0007399	nervous system development	43/110	194/694	0.390909	0.279539	1.39841	0.00388241	CNTN4/INHBA/SPP1/ROR1/JAK2/TNFRSF21/CALR/NRP1/FCGR2B/EPHA2/ANXA1/EPHB6/DLL1/VEGFA/TNFRSF1B/S100A9/B2M/CKB/TIMP2/EGFR/CSF1/FGFR1/SERPINF1/GSTP1/BMP6/EFNA4/EFNA5/NTRK2/NBL1/JAM2/SCARF1/UNC5C/NOTCH1/CAPG/EFNB1/CHRDL1/MED1/DLL4/CAMK1/PRKACA/CRK/SEMA6B/SHC1
Artery - Coronary	GO:0048699	generation of neurons	34/110	145/694	0.309091	0.208934	1.47937	0.00459958	CNTN4/INHBA/SPP1/ROR1/JAK2/TNFRSF21/CALR/NRP1/EPHA2/EPHB6/DLL1/VEGFA/TNFRSF1B/S100A9/B2M/TIMP2/EGFR/FGFR1/SERPINF1/BMP6/EFNA4/EFNA5/NTRK2/NBL1/SCARF1/UNC5C/NOTCH1/EFNB1/MED1/DLL4/CAMK1/CRK/SEMA6B/SHC1
Artery - Coronary	GO:0048545	response to steroid hormone	14/110	45/694	0.127273	0.0648415	1.96283	0.00612164	IGFBP2/SPP1/JAK2/CALR/ANXA1/STC1/GOT1/EGFR/SERPINF1/GSTP1/BMP6/NOTCH1/PARK7/MED1
Artery - Coronary	GO:0051048	negative regulation of secretion	7/110	16/694	0.0636364	0.0230548	2.76023	0.00692926	INHBA/LGALS9/FCGR2B/ANXA1/TNFRSF1B/TNFRSF1A/NOTCH1
Artery - Coronary	GO:1903531	negative regulation of secretion by cell	7/110	16/694	0.0636364	0.0230548	2.76023	0.00692926	INHBA/LGALS9/FCGR2B/ANXA1/TNFRSF1B/TNFRSF1A/NOTCH1
Artery - Coronary	GO:0033273	response to vitamin	7/110	16/694	0.0636364	0.0230548	2.76023	0.00692926	SPP1/CD4/SOD2/STC1/EGFR/GSTP1/MED1
Artery - Coronary	GO:0045595	regulation of cell differentiation	40/110	183/694	0.363636	0.263689	1.37904	0.00770777	EFEMP1/CNTN4/INHBA/SPP1/CD4/SOD2/JAK2/TNFRSF21/CALR/NRP1/ISG15/LGALS9/FCGR2B/ANXA1/DLL1/SMOC1/VEGFA/TNFRSF1B/B2M/HSPA1A/TIMP2/TNFRSF1A/EGFR/CSF1/FGFR1/SERPINF1/KDR/BMP6/DDR2/EFNA5/NTRK2/NBL1/NOTCH1/FSTL3/MED1/DLL4/CAMK1/PRKACA/CRK/SEMA6B
Artery - Coronary	GO:0021953	central nervous system neuron differentiation	6/110	13/694	0.0545455	0.018732	2.91189	0.00922143	INHBA/EPHB6/B2M/NTRK2/DLL4/CRK
Artery - Coronary	GO:0060135	maternal process involved in female pregnancy	6/110	13/694	0.0545455	0.018732	2.91189	0.00922143	SPP1/ANGPT2/LGALS9/STC1/HAVCR2/MED1
Artery - Coronary	GO:0007498	mesoderm development	6/110	13/694	0.0545455	0.018732	2.91189	0.00922143	INHBA/JAK2/EPHA2/VEGFA/SECTM1/PRKACA
Artery - Coronary	GO:2000241	regulation of reproductive process	6/110	13/694	0.0545455	0.018732	2.91189	0.00922143	INHBA/TIMP1/CALR/VEGFA/SERPINF1/NOTCH1
Artery - Coronary	GO:0002042	cell migration involved in sprouting angiogenesis	6/110	13/694	0.0545455	0.018732	2.91189	0.00922143	NRP1/ANXA1/VEGFA/KDR/NOTCH1/DLL4
Artery - Coronary	GO:0007565	female pregnancy	10/110	29/694	0.0909091	0.0417867	2.17555	0.00938646	IGFBP2/TIMP1/SPP1/ANGPT2/CALR/LGALS9/VEGFA/STC1/HAVCR2/MED1
Artery - Coronary	GO:0048731	system development	68/110	355/694	0.618182	0.511527	1.2085	0.00954709	EFEMP1/BGN/CNTN4/THBS2/INHBA/TIMP1/SPP1/CD4/SOD2/ANGPT2/ROR1/JAK2/TNFRSF21/CALR/NRP1/FAP/ISG15/LGALS9/FCGR2B/EPHA2/ANXA1/EPHB6/TNFRSF19/DLL1/SMOC1/VEGFA/FLT4/STC1/TNFRSF1B/S100A9/F3/B2M/CKB/HSPA1A/TIMP2/TNFRSF1A/EGFR/CSF1/FGFR1/SERPINF1/KDR/CHI3L1/GSTP1/BMP6/BMP1/ECE1/DDR2/EFNA4/EFNA5/NTRK2/NBL1/JAM2/SCARF1/UNC5C/NOTCH1/MAP2K4/HAVCR2/CAPG/EFNB1/FSTL3/CHRDL1/MED1/DLL4/CAMK1/PRKACA/CRK/SEMA6B/SHC1
Artery - Coronary	GO:0003158	endothelium development	9/110	25/694	0.0818182	0.0360231	2.27127	0.010038	NRP1/DLL1/VEGFA/STC1/TNFRSF1A/KDR/BMP6/NOTCH1/DLL4
Artery - Coronary	GO:0007275	multicellular organism development	70/110	370/694	0.636364	0.533141	1.19361	0.0115084	EFEMP1/BGN/CNTN4/THBS2/INHBA/TIMP1/SPP1/CD4/SOD2/ANGPT2/ROR1/JAK2/TNFRSF21/CALR/EDA2R/NRP1/FAP/ISG15/LGALS9/FCGR2B/EPHA2/ANXA1/EPHB6/TNFRSF19/DLL1/SMOC1/VEGFA/FLT4/STC1/TNFRSF1B/S100A9/F3/B2M/CKB/HSPA1A/TIMP2/TNFRSF1A/EGFR/CSF1/FGFR1/SERPINF1/KDR/CHI3L1/GSTP1/MCL1/BMP6/BMP1/ECE1/DDR2/EFNA4/EFNA5/NTRK2/NBL1/JAM2/SCARF1/UNC5C/NOTCH1/MAP2K4/HAVCR2/CAPG/EFNB1/FSTL3/CHRDL1/MED1/DLL4/CAMK1/PRKACA/CRK/S…
Artery - Coronary	GO:0030030	cell projection organization	30/110	131/694	0.272727	0.188761	1.44483	0.0121195	CNTN4/SPP1/ROR1/JAK2/TNFRSF21/NRP1/FCGR2B/EPHA2/EPHB6/VEGFA/S100A9/B2M/EGFR/SERPINF1/EFNA4/EFNA5/NTRK2/NBL1/SCARF1/UNC5C/NOTCH1/CAPG/EFNB1/DCTN2/CAMK1/PRKACA/NUDCD3/CRK/SEMA6B/SHC1
Artery - Coronary	GO:0044706	multi-multicellular organism process	10/110	30/694	0.0909091	0.0432277	2.10303	0.0122198	IGFBP2/TIMP1/SPP1/ANGPT2/CALR/LGALS9/VEGFA/STC1/HAVCR2/MED1
Artery - Coronary	GO:0032502	developmental process	77/110	417/694	0.7	0.600865	1.16499	0.0127695	FABP3/IGFBP2/EFEMP1/BGN/CNTN4/THBS2/INHBA/TIMP1/SPP1/CD4/SOD2/GHR/LYVE1/ANGPT2/ROR1/JAK2/TNFRSF21/CALR/EDA2R/NRP1/FAP/ISG15/LGALS9/FCGR2B/EPHA2/ANXA1/EPHB6/TNFRSF19/DLL1/SMOC1/VEGFA/FLT4/STC1/TNFRSF1B/SECTM1/S100A9/F3/GOT1/B2M/CKB/HSPA1A/TIMP2/CST3/TNFRSF1A/EGFR/CSF1/FGFR1/SERPINF1/KDR/CHI3L1/GSTP1/MCL1/BMP6/BMP1/ECE1/DDR2/EFNA4/EFNA5/NTRK2/NBL1/JAM2/SCARF1/UNC5C/NOTCH1/MAP2K4/HAVCR2/CAPG/EFNB1/F…
Artery - Coronary	GO:0002040	sprouting angiogenesis	9/110	26/694	0.0818182	0.037464	2.18392	0.0133351	NRP1/EPHA2/ANXA1/DLL1/VEGFA/FLT4/KDR/NOTCH1/DLL4
Artery - Coronary	GO:0050922	negative regulation of chemotaxis	6/110	14/694	0.0545455	0.0201729	2.7039	0.0140785	ANGPT2/NRP1/GSTP1/NBL1/NOTCH1/SEMA6B
Artery - Coronary	GO:0048856	anatomical structure development	73/110	392/694	0.663636	0.564841	1.17491	0.014262	EFEMP1/BGN/CNTN4/THBS2/INHBA/TIMP1/SPP1/CD4/SOD2/LYVE1/ANGPT2/ROR1/JAK2/TNFRSF21/CALR/EDA2R/NRP1/FAP/ISG15/LGALS9/FCGR2B/EPHA2/ANXA1/EPHB6/TNFRSF19/DLL1/SMOC1/VEGFA/FLT4/STC1/TNFRSF1B/SECTM1/S100A9/F3/B2M/CKB/HSPA1A/TIMP2/CST3/TNFRSF1A/EGFR/CSF1/FGFR1/SERPINF1/KDR/CHI3L1/GSTP1/MCL1/BMP6/BMP1/ECE1/DDR2/EFNA4/EFNA5/NTRK2/NBL1/JAM2/SCARF1/UNC5C/NOTCH1/MAP2K4/HAVCR2/CAPG/EFNB1/FSTL3/CHRDL1/MED1/DLL4/…
Artery - Coronary	GO:0030218	erythrocyte differentiation	7/110	18/694	0.0636364	0.0259366	2.45354	0.0146119	INHBA/JAK2/ISG15/VEGFA/B2M/HSPA1A/MED1
Artery - Coronary	GO:0034101	erythrocyte homeostasis	7/110	18/694	0.0636364	0.0259366	2.45354	0.0146119	INHBA/JAK2/ISG15/VEGFA/B2M/HSPA1A/MED1
Artery - Coronary	GO:0032870	cellular response to hormone stimulus	17/110	64/694	0.154545	0.092219	1.67585	0.0147634	IGFBP2/INHBA/GHR/JAK2/CALR/ANXA1/STC1/GOT1/EGFR/SERPINF1/GSTP1/NOTCH1/PARK7/MED1/PRKACA/CRK/SHC1
Artery - Coronary	GO:0030154	cell differentiation	61/110	316/694	0.554545	0.455331	1.21789	0.0150067	FABP3/EFEMP1/CNTN4/INHBA/SPP1/CD4/SOD2/ANGPT2/ROR1/JAK2/TNFRSF21/CALR/EDA2R/NRP1/ISG15/LGALS9/FCGR2B/EPHA2/ANXA1/EPHB6/DLL1/SMOC1/VEGFA/FLT4/STC1/TNFRSF1B/S100A9/GOT1/B2M/HSPA1A/TIMP2/TNFRSF1A/EGFR/CSF1/FGFR1/SERPINF1/KDR/GSTP1/MCL1/BMP6/BMP1/DDR2/EFNA4/EFNA5/NTRK2/NBL1/JAM2/SCARF1/UNC5C/NOTCH1/MAP2K4/EFNB1/FSTL3/CHRDL1/MED1/DLL4/CAMK1/PRKACA/CRK/SEMA6B/SHC1
Artery - Coronary	GO:0050793	regulation of developmental process	52/110	261/694	0.472727	0.376081	1.25698	0.0155287	EFEMP1/CNTN4/THBS2/INHBA/SPP1/CD4/SOD2/GHR/ANGPT2/ROR1/JAK2/TNFRSF21/CALR/NRP1/ISG15/LGALS9/FCGR2B/EPHA2/ANXA1/DLL1/SMOC1/VEGFA/FLT4/TNFRSF1B/F3/B2M/HSPA1A/TIMP2/CST3/TNFRSF1A/EGFR/CSF1/FGFR1/SERPINF1/KDR/CHI3L1/BMP6/BMP1/DDR2/EFNA5/NTRK2/NBL1/JAM2/SCARF1/NOTCH1/FSTL3/MED1/DLL4/CAMK1/PRKACA/CRK/SEMA6B
Artery - Coronary	GO:0097193	intrinsic apoptotic signaling pathway	14/110	50/694	0.127273	0.0720461	1.76655	0.0168126	SOD2/JAK2/EDA2R/ENO1/EPHA2/TNFRSF1B/PLAUR/S100A9/HSPA1A/TNFRSF1A/MCL1/PARK7/HINT1/TXNDC12
Artery - Coronary	GO:0048869	cellular developmental process	61/110	318/694	0.554545	0.458213	1.21023	0.0177194	FABP3/EFEMP1/CNTN4/INHBA/SPP1/CD4/SOD2/ANGPT2/ROR1/JAK2/TNFRSF21/CALR/EDA2R/NRP1/ISG15/LGALS9/FCGR2B/EPHA2/ANXA1/EPHB6/DLL1/SMOC1/VEGFA/FLT4/STC1/TNFRSF1B/S100A9/GOT1/B2M/HSPA1A/TIMP2/TNFRSF1A/EGFR/CSF1/FGFR1/SERPINF1/KDR/GSTP1/MCL1/BMP6/BMP1/DDR2/EFNA4/EFNA5/NTRK2/NBL1/JAM2/SCARF1/UNC5C/NOTCH1/MAP2K4/EFNB1/FSTL3/CHRDL1/MED1/DLL4/CAMK1/PRKACA/CRK/SEMA6B/SHC1
Artery - Coronary	GO:0120036	plasma membrane bounded cell projection organization	29/110	129/694	0.263636	0.185879	1.41832	0.0180961	CNTN4/SPP1/ROR1/JAK2/TNFRSF21/NRP1/FCGR2B/EPHA2/EPHB6/VEGFA/S100A9/B2M/EGFR/SERPINF1/EFNA4/EFNA5/NTRK2/NBL1/SCARF1/UNC5C/NOTCH1/EFNB1/DCTN2/CAMK1/PRKACA/NUDCD3/CRK/SEMA6B/SHC1
Artery - Coronary	GO:0002262	myeloid cell homeostasis	8/110	23/694	0.0727273	0.0331412	2.19447	0.0189612	INHBA/JAK2/ISG15/ANXA1/VEGFA/B2M/HSPA1A/MED1
Artery - Coronary	GO:0035924	cellular response to vascular endothelial growth factor stimulus	8/110	23/694	0.0727273	0.0331412	2.19447	0.0189612	NRP1/ANXA1/DLL1/VEGFA/FLT4/KDR/NOTCH1/DLL4
Artery - Coronary	GO:0045446	endothelial cell differentiation	8/110	23/694	0.0727273	0.0331412	2.19447	0.0189612	NRP1/DLL1/VEGFA/STC1/TNFRSF1A/KDR/BMP6/NOTCH1
Artery - Coronary	GO:0045646	regulation of erythrocyte differentiation	5/110	11/694	0.0454545	0.0158501	2.86777	0.0190599	INHBA/ISG15/B2M/HSPA1A/MED1
Artery - Coronary	GO:0001909	leukocyte mediated cytotoxicity	5/110	11/694	0.0454545	0.0158501	2.86777	0.0190599	LGALS9/FCGR2B/B2M/HAVCR2/CRK
Artery - Coronary	GO:0010594	regulation of endothelial cell migration	13/110	46/694	0.118182	0.0662824	1.783	0.0195558	ANGPT2/CALR/NRP1/EPHA2/ANXA1/VEGFA/FLT4/STC1/FGFR1/SERPINF1/KDR/NOTCH1/DLL4
Artery - Coronary	GO:0045596	negative regulation of cell differentiation	17/110	66/694	0.154545	0.0951009	1.62507	0.0202066	EFEMP1/CNTN4/INHBA/SPP1/CALR/NRP1/FCGR2B/ANXA1/DLL1/VEGFA/B2M/EGFR/EFNA5/NOTCH1/FSTL3/MED1/SEMA6B
Artery - Coronary	GO:0032501	multicellular organismal process	82/110	456/694	0.745455	0.657061	1.13453	0.0202269	IGFBP2/EFEMP1/BGN/CNTN4/THBS2/INHBA/TIMP1/SPP1/ACP5/CD4/SOD2/GHR/ANGPT2/ROR1/JAK2/TNFRSF21/CALR/EDA2R/NRP1/FAP/ENO1/ISG15/LGALS9/FCGR2B/EPHA2/ANXA1/EPHB6/TNFRSF19/DLL1/IGHA1/SMOC1/VEGFA/FLT4/STC1/TNFRSF1B/PLAUR/S100A9/VWF/F3/B2M/CKB/HSPA1A/TIMP2/CST3/TNFRSF1A/EGFR/CSF1/FGFR1/SERPINF1/KDR/CHI3L1/GSTP1/MCL1/BMP6/BMP1/ECE1/DDR2/EFNA4/EFNA5/NTRK2/CD59/NBL1/JAM2/SCARF1/UNC5C/NOTCH1/MAP2K4/HAVCR2/CAPG/…
Artery - Coronary	GO:0031341	regulation of cell killing	6/110	15/694	0.0545455	0.0216138	2.52364	0.0204785	LGALS9/FCGR2B/B2M/CD59/HAVCR2/CRK
Artery - Coronary	GO:1903053	regulation of extracellular matrix organization	6/110	15/694	0.0545455	0.0216138	2.52364	0.0204785	FAP/TNFRSF1B/CST3/TNFRSF1A/DDR2/NOTCH1
Artery - Coronary	GO:0060041	retina development in camera-type eye	6/110	15/694	0.0545455	0.0216138	2.52364	0.0204785	NRP1/DLL1/SERPINF1/NTRK2/MED1/DLL4
Artery - Coronary	GO:0032637	interleukin-8 production	6/110	15/694	0.0545455	0.0216138	2.52364	0.0204785	LGALS9/ANXA1/F3/HSPA1A/CHI3L1/PARK7
Artery - Coronary	GO:0048872	homeostasis of number of cells	11/110	37/694	0.1	0.0533141	1.87568	0.021506	INHBA/JAK2/ISG15/LGALS9/ANXA1/VEGFA/B2M/HSPA1A/CSF1/NOTCH1/MED1
Artery - Coronary	GO:2000026	regulation of multicellular organismal development	34/110	160/694	0.309091	0.230548	1.34068	0.0244079	EFEMP1/THBS2/INHBA/SPP1/CD4/ANGPT2/TNFRSF21/NRP1/ISG15/LGALS9/FCGR2B/EPHA2/ANXA1/DLL1/VEGFA/TNFRSF1B/F3/B2M/HSPA1A/TNFRSF1A/CSF1/SERPINF1/KDR/CHI3L1/BMP6/BMP1/DDR2/NTRK2/JAM2/NOTCH1/FSTL3/MED1/DLL4/SEMA6B
Artery - Coronary	GO:0010811	positive regulation of cell-substrate adhesion	8/110	24/694	0.0727273	0.0345821	2.10303	0.0247431	JAK2/CALR/NRP1/CCDC80/VEGFA/CSF1/KDR/CRK
Artery - Coronary	GO:0043588	skin development	8/110	24/694	0.0727273	0.0345821	2.10303	0.0247431	INHBA/EPHA2/ANXA1/TNFRSF19/DLL1/EGFR/NOTCH1/MED1
Artery - Coronary	GO:0031175	neuron projection development	25/110	110/694	0.227273	0.158501	1.43388	0.0252611	CNTN4/SPP1/ROR1/JAK2/TNFRSF21/NRP1/EPHA2/EPHB6/VEGFA/S100A9/B2M/EGFR/SERPINF1/EFNA4/EFNA5/NTRK2/NBL1/SCARF1/UNC5C/NOTCH1/EFNB1/CAMK1/CRK/SEMA6B/SHC1
Artery - Coronary	GO:0051093	negative regulation of developmental process	22/110	94/694	0.2	0.135447	1.4766	0.0259824	EFEMP1/CNTN4/THBS2/INHBA/SPP1/ANGPT2/CALR/NRP1/FCGR2B/EPHA2/ANXA1/DLL1/VEGFA/B2M/CST3/EGFR/SERPINF1/EFNA5/NOTCH1/FSTL3/MED1/SEMA6B
Artery - Coronary	GO:0007167	enzyme linked receptor protein signaling pathway	35/110	167/694	0.318182	0.240634	1.32226	0.0275212	IGFBP2/EFEMP1/INHBA/CD4/GHR/ANGPT2/JAK2/NRP1/EPHA2/IGFBP6/EPHB6/DLL1/VEGFA/FLT4/PLAUR/F3/GOT1/HSPA1A/EGFR/CSF1/FGFR1/KDR/BMP6/DDR2/EFNA4/EFNA5/NTRK2/NBL1/IGFBP4/NOTCH1/EFNB1/FSTL3/CHRDL1/CRK/SHC1
Artery - Coronary	GO:0032102	negative regulation of response to external stimulus	16/110	63/694	0.145455	0.0907781	1.60231	0.0276065	SPP1/ANGPT2/NRP1/FAP/LGALS9/FCGR2B/TNFRSF1B/PLAUR/TNFRSF1A/SERPINF1/GSTP1/NBL1/NOTCH1/HAVCR2/CRK/SEMA6B
Artery - Coronary	GO:0031960	response to corticosteroid	9/110	29/694	0.0818182	0.0417867	1.95799	0.0280417	IGFBP2/ANXA1/STC1/GOT1/EGFR/SERPINF1/GSTP1/BMP6/NOTCH1
Artery - Coronary	GO:0010596	negative regulation of endothelial cell migration	5/110	12/694	0.0454545	0.0172911	2.62879	0.0286072	ANGPT2/STC1/SERPINF1/NOTCH1/DLL4
Artery - Coronary	GO:1901890	positive regulation of cell junction assembly	5/110	12/694	0.0454545	0.0172911	2.62879	0.0286072	NRP1/EPHA2/VEGFA/KDR/NTRK2
Artery - Coronary	GO:0007169	transmembrane receptor protein tyrosine kinase signaling pathway	27/110	123/694	0.245455	0.177233	1.38492	0.0312532	IGFBP2/EFEMP1/CD4/GHR/ANGPT2/JAK2/NRP1/EPHA2/IGFBP6/EPHB6/DLL1/VEGFA/FLT4/PLAUR/F3/EGFR/CSF1/FGFR1/KDR/DDR2/EFNA4/EFNA5/NTRK2/IGFBP4/EFNB1/CRK/SHC1
Artery - Coronary	GO:0051384	response to glucocorticoid	8/110	25/694	0.0727273	0.0360231	2.01891	0.0316632	IGFBP2/ANXA1/STC1/GOT1/EGFR/SERPINF1/GSTP1/BMP6
Artery - Coronary	GO:0008544	epidermis development	9/110	30/694	0.0818182	0.0432277	1.89273	0.0348226	INHBA/EDA2R/EPHA2/ANXA1/TNFRSF19/DLL1/EGFR/NOTCH1/MED1
Artery - Coronary	GO:0044703	multi-organism reproductive process	16/110	65/694	0.145455	0.0936599	1.55301	0.0366447	IGFBP2/INHBA/TIMP1/SPP1/ANGPT2/CALR/LGALS9/VEGFA/STC1/JAM2/NOTCH1/HAVCR2/PARK7/FSTL3/MED1/PRKACA
Artery - Coronary	GO:0048609	multicellular organismal reproductive process	14/110	55/694	0.127273	0.0792507	1.60595	0.0381601	INHBA/SPP1/ANGPT2/CALR/LGALS9/STC1/EGFR/SERPINF1/JAM2/NOTCH1/HAVCR2/FSTL3/MED1/PRKACA
Artery - Coronary	GO:0051960	regulation of nervous system development	13/110	50/694	0.118182	0.0720461	1.64036	0.0385245	SPP1/TNFRSF21/NRP1/DLL1/VEGFA/TNFRSF1B/B2M/SERPINF1/NTRK2/JAM2/NOTCH1/DLL4/SEMA6B
Artery - Coronary	GO:0071407	cellular response to organic cyclic compound	13/110	50/694	0.118182	0.0720461	1.64036	0.0385245	INHBA/SPP1/GPD1/JAK2/CALR/ANXA1/STC1/EGFR/SERPINF1/GSTP1/PARK7/MED1/PRKACA
Artery - Coronary	GO:0030856	regulation of epithelial cell differentiation	6/110	17/694	0.0545455	0.0244957	2.22674	0.038619	DLL1/VEGFA/TNFRSF1A/BMP6/NOTCH1/MED1
Artery - Coronary	GO:0022617	extracellular matrix disassembly	6/110	17/694	0.0545455	0.0244957	2.22674	0.038619	TIMP1/FAP/TIMP2/CST3/BMP1/DDR2
Artery - Coronary	GO:0001667	ameboidal-type cell migration	18/110	76/694	0.163636	0.10951	1.49426	0.0391219	TIMP1/ANGPT2/CALR/NRP1/FAP/EPHA2/ANXA1/VEGFA/FLT4/STC1/FGFR1/SERPINF1/KDR/DDR2/NOTCH1/EFNB1/DLL4/SEMA6B
Artery - Coronary	GO:0048754	branching morphogenesis of an epithelial tube	8/110	26/694	0.0727273	0.037464	1.94126	0.0398091	NRP1/EPHA2/VEGFA/CSF1/KDR/NOTCH1/MED1/DLL4
Artery - Coronary	GO:0007584	response to nutrient	8/110	26/694	0.0727273	0.037464	1.94126	0.0398091	IGFBP2/SPP1/CD4/SOD2/STC1/EGFR/GSTP1/MED1
Artery - Coronary	GO:0061564	axon development	17/110	71/694	0.154545	0.102305	1.51063	0.040564	CNTN4/SPP1/JAK2/TNFRSF21/NRP1/EPHA2/EPHB6/VEGFA/EFNA4/EFNA5/NTRK2/SCARF1/UNC5C/NOTCH1/EFNB1/SEMA6B/SHC1
Artery - Coronary	GO:0048513	animal organ development	52/110	273/694	0.472727	0.393372	1.20173	0.0407143	EFEMP1/BGN/CNTN4/INHBA/TIMP1/SPP1/CD4/ANGPT2/ROR1/JAK2/CALR/NRP1/ISG15/LGALS9/FCGR2B/EPHA2/ANXA1/TNFRSF19/DLL1/SMOC1/VEGFA/FLT4/STC1/TNFRSF1B/B2M/CKB/HSPA1A/TNFRSF1A/EGFR/CSF1/FGFR1/SERPINF1/KDR/CHI3L1/GSTP1/BMP6/BMP1/ECE1/DDR2/NTRK2/NBL1/UNC5C/NOTCH1/MAP2K4/EFNB1/FSTL3/CHRDL1/MED1/DLL4/CRK/SEMA6B/SHC1
Artery - Coronary	GO:0051239	regulation of multicellular organismal process	52/110	273/694	0.472727	0.393372	1.20173	0.0407143	EFEMP1/THBS2/INHBA/TIMP1/SPP1/CD4/GHR/ANGPT2/JAK2/TNFRSF21/CALR/NRP1/FAP/ENO1/ISG15/LGALS9/FCGR2B/EPHA2/ANXA1/DLL1/VEGFA/FLT4/STC1/TNFRSF1B/PLAUR/F3/B2M/HSPA1A/CST3/TNFRSF1A/EGFR/CSF1/FGFR1/SERPINF1/KDR/CHI3L1/GSTP1/BMP6/BMP1/ECE1/DDR2/NTRK2/JAM2/NOTCH1/HAVCR2/PARK7/FSTL3/MED1/DLL4/PRKACA/IL17RC/SEMA6B
Artery - Coronary	GO:0007566	embryo implantation	5/110	13/694	0.0454545	0.018732	2.42657	0.0407233	TIMP1/SPP1/CALR/VEGFA/STC1
Artery - Coronary	GO:0010633	negative regulation of epithelial cell migration	5/110	13/694	0.0454545	0.018732	2.42657	0.0407233	ANGPT2/STC1/SERPINF1/NOTCH1/DLL4
Artery - Coronary	GO:0001764	neuron migration	5/110	13/694	0.0454545	0.018732	2.42657	0.0407233	NRP1/VEGFA/FGFR1/NTRK2/CRK
Artery - Coronary	GO:0098773	skin epidermis development	5/110	13/694	0.0454545	0.018732	2.42657	0.0407233	INHBA/TNFRSF19/DLL1/EGFR/NOTCH1
Artery - Coronary	GO:0038084	vascular endothelial growth factor signaling pathway	5/110	13/694	0.0454545	0.018732	2.42657	0.0407233	NRP1/DLL1/VEGFA/FLT4/KDR
Artery - Coronary	GO:0048468	cell development	38/110	189/694	0.345455	0.272334	1.26849	0.0409703	CNTN4/SPP1/ANGPT2/ROR1/JAK2/TNFRSF21/CALR/NRP1/EPHA2/EPHB6/DLL1/VEGFA/STC1/TNFRSF1B/S100A9/B2M/TNFRSF1A/EGFR/SERPINF1/GSTP1/BMP6/EFNA4/EFNA5/NTRK2/NBL1/JAM2/SCARF1/UNC5C/NOTCH1/MAP2K4/EFNB1/MED1/DLL4/CAMK1/PRKACA/CRK/SEMA6B/SHC1
Artery - Coronary	GO:0043534	blood vessel endothelial cell migration	9/110	31/694	0.0818182	0.0446686	1.83167	0.0426627	ANGPT2/NRP1/EPHA2/ANXA1/VEGFA/FGFR1/KDR/NOTCH1/DLL4
Artery - Coronary	GO:0032504	multicellular organism reproduction	14/110	56/694	0.127273	0.0806916	1.57727	0.0441022	INHBA/SPP1/ANGPT2/CALR/LGALS9/STC1/EGFR/SERPINF1/JAM2/NOTCH1/HAVCR2/FSTL3/MED1/PRKACA
Artery - Coronary	GO:0043542	endothelial cell migration	14/110	56/694	0.127273	0.0806916	1.57727	0.0441022	ANGPT2/CALR/NRP1/FAP/EPHA2/ANXA1/VEGFA/FLT4/STC1/FGFR1/SERPINF1/KDR/NOTCH1/DLL4
Artery - Coronary	GO:0010721	negative regulation of cell development	7/110	22/694	0.0636364	0.0317003	2.00744	0.0451643	SPP1/NRP1/VEGFA/B2M/EFNA5/NOTCH1/SEMA6B
Artery - Coronary	GO:0007411	axon guidance	12/110	46/694	0.109091	0.0662824	1.64585	0.045203	CNTN4/NRP1/EPHA2/EPHB6/VEGFA/EFNA4/EFNA5/UNC5C/NOTCH1/EFNB1/SEMA6B/SHC1
Artery - Coronary	GO:0097485	neuron projection guidance	12/110	46/694	0.109091	0.0662824	1.64585	0.045203	CNTN4/NRP1/EPHA2/EPHB6/VEGFA/EFNA4/EFNA5/UNC5C/NOTCH1/EFNB1/SEMA6B/SHC1
Artery - Coronary	GO:0018212	peptidyl-tyrosine modification	20/110	88/694	0.181818	0.126801	1.43388	0.045438	EFEMP1/CD4/GHR/ROR1/JAK2/NRP1/EPHA2/EPHB6/VEGFA/FLT4/TNFRSF1A/EGFR/FGFR1/KDR/BMP6/DDR2/EFNA5/NTRK2/MAP2K4/SHC1
Artery - Coronary	GO:0018108	peptidyl-tyrosine phosphorylation	20/110	88/694	0.181818	0.126801	1.43388	0.045438	EFEMP1/CD4/GHR/ROR1/JAK2/NRP1/EPHA2/EPHB6/VEGFA/FLT4/TNFRSF1A/EGFR/FGFR1/KDR/BMP6/DDR2/EFNA5/NTRK2/MAP2K4/SHC1
Artery - Coronary	GO:0048666	neuron development	25/110	116/694	0.227273	0.167147	1.35972	0.0474965	CNTN4/SPP1/ROR1/JAK2/TNFRSF21/NRP1/EPHA2/EPHB6/VEGFA/S100A9/B2M/EGFR/SERPINF1/EFNA4/EFNA5/NTRK2/NBL1/SCARF1/UNC5C/NOTCH1/EFNB1/CAMK1/CRK/SEMA6B/SHC1
Artery - Coronary	GO:0051129	negative regulation of cellular component organization	16/110	67/694	0.145455	0.0965418	1.50665	0.0476932	SPP1/NRP1/FAP/VEGFA/TNFRSF1B/B2M/HSPA1A/CST3/TNFRSF1A/BMP6/H1-2/NOTCH1/CAPG/PARK7/LCMT1/SEMA6B
Artery - Coronary	GO:0043535	regulation of blood vessel endothelial cell migration	8/110	27/694	0.0727273	0.0389049	1.86936	0.049254	ANGPT2/EPHA2/ANXA1/VEGFA/FGFR1/KDR/NOTCH1/DLL4
Artery - Coronary	GO:0051094	positive regulation of developmental process	34/110	168/694	0.309091	0.242075	1.27684	0.0499071	INHBA/CD4/SOD2/GHR/ANGPT2/JAK2/CALR/NRP1/ISG15/LGALS9/ANXA1/DLL1/VEGFA/TNFRSF1B/F3/B2M/HSPA1A/TIMP2/TNFRSF1A/CSF1/FGFR1/SERPINF1/KDR/CHI3L1/BMP6/BMP1/DDR2/NTRK2/NBL1/SCARF1/NOTCH1/MED1/CAMK1/CRK
Heart - Atrial Appendage	GO:0045664	regulation of neuron differentiation	8/85	16/579	0.0941176	0.0276339	3.40588	0.000748042	CALR/DLL1/BMP7/B2M/TIMP2/FGFR1/NBL1/NOTCH1
Heart - Atrial Appendage	GO:0051241	negative regulation of multicellular organismal process	27/85	110/579	0.317647	0.189983	1.67198	0.00155027	BMP10/EFEMP1/THBS2/TIMP1/SPP1/TNFRSF21/CALR/NRP1/ISG15/LGALS9/EPHA2/ANXA1/DLL1/BMP7/STC1/TNFRSF1B/PLAUR/B2M/CST3/TNFRSF1A/SERPINF1/GSTP1/JAM2/NOTCH1/FSTL3/DLL4/SEMA6B
Heart - Atrial Appendage	GO:0002042	cell migration involved in sprouting angiogenesis	6/85	11/579	0.0705882	0.0189983	3.71551	0.0021171	NRP1/ANXA1/VEGFA/KDR/NOTCH1/DLL4
Heart - Atrial Appendage	GO:0048738	cardiac muscle tissue development	10/85	27/579	0.117647	0.0466321	2.52288	0.00277776	CSRP3/BMP10/TNNT2/CALR/DLL1/VEGFA/BMP7/NOTCH1/MAP2K4/DLL4
Heart - Atrial Appendage	GO:0035051	cardiocyte differentiation	8/85	19/579	0.0941176	0.0328152	2.86811	0.00299901	CSRP3/BMP10/CALR/DLL1/VEGFA/BMP7/NOTCH1/MAP2K4
Heart - Atrial Appendage	GO:0055007	cardiac muscle cell differentiation	6/85	12/579	0.0705882	0.0207254	3.40588	0.00373751	CSRP3/BMP10/CALR/DLL1/VEGFA/MAP2K4
Heart - Atrial Appendage	GO:2000241	regulation of reproductive process	6/85	12/579	0.0705882	0.0207254	3.40588	0.00373751	TIMP1/CALR/VEGFA/BMP7/SERPINF1/NOTCH1
Heart - Atrial Appendage	GO:0071383	cellular response to steroid hormone stimulus	7/85	16/579	0.0823529	0.0276339	2.98015	0.00432814	CALR/ANXA1/BMP7/STC1/SERPINF1/GSTP1/PARK7
Heart - Atrial Appendage	GO:0001654	eye development	9/85	25/579	0.105882	0.0431779	2.45224	0.0057453	EFEMP1/NRP1/EPHA2/DLL1/VEGFA/BMP7/SERPINF1/CHRDL1/DLL4
Heart - Atrial Appendage	GO:0003300	cardiac muscle hypertrophy	6/85	13/579	0.0705882	0.0224525	3.14389	0.00612832	CSRP3/BMP10/TNFRSF1B/TNFRSF1A/NOTCH1/MAP2K4
Heart - Atrial Appendage	GO:0010594	regulation of endothelial cell migration	12/85	39/579	0.141176	0.0673575	2.09593	0.00619994	BMP10/CALR/NRP1/EPHA2/ANXA1/VEGFA/STC1/FGFR1/SERPINF1/KDR/NOTCH1/DLL4
Heart - Atrial Appendage	GO:0002040	sprouting angiogenesis	8/85	21/579	0.0941176	0.0362694	2.59496	0.00626294	NRP1/EPHA2/ANXA1/DLL1/VEGFA/KDR/NOTCH1/DLL4
Heart - Atrial Appendage	GO:0043010	camera-type eye development	8/85	21/579	0.0941176	0.0362694	2.59496	0.00626294	EFEMP1/NRP1/EPHA2/DLL1/VEGFA/BMP7/SERPINF1/DLL4
Heart - Atrial Appendage	GO:0045595	regulation of cell differentiation	32/85	151/579	0.376471	0.260794	1.44355	0.0074765	BMP10/EFEMP1/SPP1/CD4/SOD2/TNFRSF21/CALR/NRP1/ISG15/LGALS9/ANXA1/DLL1/VEGFA/BMP7/TNFRSF1B/B2M/HSPA1A/TIMP2/TNFRSF1A/CSF1/FGFR1/SERPINF1/KDR/DDR2/NBL1/NOTCH1/FSTL3/DLL4/CAMK1/PRKACA/CRK/SEMA6B
Heart - Atrial Appendage	GO:0040013	negative regulation of locomotion	12/85	40/579	0.141176	0.0690846	2.04353	0.00778909	BMP10/TIMP1/CALR/NRP1/STC1/SERPINF1/GSTP1/NBL1/NOTCH1/DLL4/CRK/SEMA6B
Heart - Atrial Appendage	GO:0051960	regulation of nervous system development	13/85	45/579	0.152941	0.0777202	1.96784	0.00795367	SPP1/TNFRSF21/NRP1/DLL1/VEGFA/BMP7/TNFRSF1B/B2M/SERPINF1/JAM2/NOTCH1/DLL4/SEMA6B
Heart - Atrial Appendage	GO:0032637	interleukin-8 production	5/85	10/579	0.0588235	0.0172712	3.40588	0.00839252	LGALS9/ANXA1/F3/HSPA1A/PARK7
Heart - Atrial Appendage	GO:0050922	negative regulation of chemotaxis	5/85	10/579	0.0588235	0.0172712	3.40588	0.00839252	NRP1/GSTP1/NBL1/NOTCH1/SEMA6B
Heart - Atrial Appendage	GO:0032677	regulation of interleukin-8 production	5/85	10/579	0.0588235	0.0172712	3.40588	0.00839252	LGALS9/ANXA1/F3/HSPA1A/PARK7
Heart - Atrial Appendage	GO:2000026	regulation of multicellular organismal development	29/85	134/579	0.341176	0.231434	1.47419	0.00848173	BMP10/EFEMP1/THBS2/SPP1/CD4/TNFRSF21/NRP1/ISG15/LGALS9/EPHA2/ANXA1/DLL1/VEGFA/BMP7/TNFRSF1B/F3/B2M/HSPA1A/TNFRSF1A/CSF1/SERPINF1/KDR/BMP1/DDR2/JAM2/NOTCH1/FSTL3/DLL4/SEMA6B
Heart - Atrial Appendage	GO:0007389	pattern specification process	8/85	22/579	0.0941176	0.0379965	2.47701	0.00866926	DLL1/BMP7/STC1/NBL1/NOTCH1/EFNB1/DLL4/PRKACA
Heart - Atrial Appendage	GO:0048285	organelle fission	7/85	18/579	0.0823529	0.0310881	2.64902	0.00936038	CALR/BMP7/HSPA1A/KDR/NSFL1C/DCTN2/LCMT1
Heart - Atrial Appendage	GO:0042692	muscle cell differentiation	11/85	36/579	0.129412	0.0621762	2.08137	0.00937413	CSRP3/BMP10/TNNT2/SOD2/CALR/DLL1/VEGFA/JAM2/NOTCH1/MAP2K4/CAMK1
Heart - Atrial Appendage	GO:0014897	striated muscle hypertrophy	6/85	14/579	0.0705882	0.0241796	2.91933	0.00947113	CSRP3/BMP10/TNFRSF1B/TNFRSF1A/NOTCH1/MAP2K4
Heart - Atrial Appendage	GO:0014896	muscle hypertrophy	6/85	14/579	0.0705882	0.0241796	2.91933	0.00947113	CSRP3/BMP10/TNFRSF1B/TNFRSF1A/NOTCH1/MAP2K4
Heart - Atrial Appendage	GO:0001667	ameboidal-type cell migration	17/85	67/579	0.2	0.115717	1.72836	0.0101096	BMP10/TIMP1/CALR/NRP1/EPHA2/ANXA1/VEGFA/BMP7/STC1/FGFR1/SERPINF1/KDR/DDR2/NOTCH1/EFNB1/DLL4/SEMA6B
Heart - Atrial Appendage	GO:0051146	striated muscle cell differentiation	9/85	27/579	0.105882	0.0466321	2.27059	0.0102128	CSRP3/BMP10/TNNT2/CALR/DLL1/VEGFA/JAM2/NOTCH1/MAP2K4
Heart - Atrial Appendage	GO:0048880	sensory system development	9/85	27/579	0.105882	0.0466321	2.27059	0.0102128	EFEMP1/NRP1/EPHA2/DLL1/VEGFA/BMP7/SERPINF1/CHRDL1/DLL4
Heart - Atrial Appendage	GO:0150063	visual system development	9/85	27/579	0.105882	0.0466321	2.27059	0.0102128	EFEMP1/NRP1/EPHA2/DLL1/VEGFA/BMP7/SERPINF1/CHRDL1/DLL4
Heart - Atrial Appendage	GO:0051129	negative regulation of cellular component organization	15/85	57/579	0.176471	0.0984456	1.79257	0.0111791	SPP1/NRP1/VEGFA/BMP7/TNFRSF1B/B2M/HSPA1A/CST3/TNFRSF1A/H1-2/NOTCH1/CAPG/PARK7/LCMT1/SEMA6B
Heart - Atrial Appendage	GO:0048754	branching morphogenesis of an epithelial tube	8/85	23/579	0.0941176	0.0397237	2.36931	0.0117106	NRP1/EPHA2/VEGFA/BMP7/CSF1/KDR/NOTCH1/DLL4
Heart - Atrial Appendage	GO:0003158	endothelium development	8/85	23/579	0.0941176	0.0397237	2.36931	0.0117106	NRP1/DLL1/VEGFA/STC1/TNFRSF1A/KDR/NOTCH1/DLL4
Heart - Atrial Appendage	GO:0055006	cardiac cell development	5/85	11/579	0.0588235	0.0189983	3.09626	0.013622	CSRP3/BMP10/VEGFA/NOTCH1/MAP2K4
Heart - Atrial Appendage	GO:0035767	endothelial cell chemotaxis	5/85	11/579	0.0588235	0.0189983	3.09626	0.013622	NRP1/VEGFA/FGFR1/KDR/NOTCH1
Heart - Atrial Appendage	GO:0010596	negative regulation of endothelial cell migration	5/85	11/579	0.0588235	0.0189983	3.09626	0.013622	BMP10/STC1/SERPINF1/NOTCH1/DLL4
Heart - Atrial Appendage	GO:0055001	muscle cell development	6/85	15/579	0.0705882	0.0259067	2.72471	0.013944	CSRP3/BMP10/TNNT2/VEGFA/NOTCH1/MAP2K4
Heart - Atrial Appendage	GO:0051239	regulation of multicellular organismal process	43/85	229/579	0.505882	0.395509	1.27906	0.0170908	CSRP3/BMP10/TNNT2/EFEMP1/THBS2/TIMP1/SPP1/CD4/TNFRSF21/CALR/NRP1/ENO1/ISG15/LGALS9/EPHA2/ANXA1/DLL1/VEGFA/BMP7/STC1/TNFRSF1B/PLAUR/F3/B2M/HSPA1A/CST3/TNFRSF1A/CSF1/FGFR1/SERPINF1/KDR/GSTP1/BMP1/ECE1/DDR2/JAM2/NOTCH1/PARK7/FSTL3/DLL4/PRKACA/IL17RC/SEMA6B
Heart - Atrial Appendage	GO:0097193	intrinsic apoptotic signaling pathway	12/85	44/579	0.141176	0.0759931	1.85775	0.0175849	SOD2/ENO1/EPHA2/TNFRSF1B/PLAUR/S100A9/HSPA1A/TNFRSF1A/MCL1/PARK7/HINT1/TXNDC12
Heart - Atrial Appendage	GO:0014706	striated muscle tissue development	10/85	34/579	0.117647	0.0587219	2.00346	0.0176231	CSRP3/BMP10/TNNT2/CALR/DLL1/VEGFA/BMP7/NOTCH1/MAP2K4/DLL4
Heart - Atrial Appendage	GO:0048545	response to steroid hormone	11/85	39/579	0.129412	0.0673575	1.92127	0.0177964	IGFBP2/SPP1/CALR/ANXA1/BMP7/STC1/GOT1/SERPINF1/GSTP1/NOTCH1/PARK7
Heart - Atrial Appendage	GO:0007423	sensory organ development	11/85	39/579	0.129412	0.0673575	1.92127	0.0177964	EFEMP1/NRP1/EPHA2/DLL1/VEGFA/BMP7/SERPINF1/ECE1/NOTCH1/CHRDL1/DLL4
Heart - Atrial Appendage	GO:0060326	cell chemotaxis	15/85	60/579	0.176471	0.103627	1.70294	0.0183231	CALR/NRP1/LGALS9/EPHA2/ANXA1/VEGFA/S100A9/CSF1/FGFR1/KDR/GSTP1/NBL1/NOTCH1/IL17RC/CRK
Heart - Atrial Appendage	GO:0048731	system development	53/85	298/579	0.623529	0.51468	1.21149	0.0195148	CSRP3/BMP10/TNNT2/EFEMP1/BGN/THBS2/TIMP1/SPP1/CD4/SOD2/TNFRSF21/CALR/NRP1/ISG15/LGALS9/EPHA2/ANXA1/TNFRSF19/DLL1/VEGFA/BMP7/STC1/TNFRSF1B/S100A9/F3/B2M/CKB/HSPA1A/TIMP2/TNFRSF1A/CSF1/FGFR1/SERPINF1/KDR/GSTP1/BMP1/ECE1/DDR2/NBL1/JAM2/SCARF1/NOTCH1/MAP2K4/CAPG/EFNB1/FSTL3/CHRDL1/DLL4/CAMK1/PRKACA/CRK/SEMA6B/SHC1
Heart - Atrial Appendage	GO:0000280	nuclear division	6/85	16/579	0.0705882	0.0276339	2.55441	0.0197135	CALR/BMP7/HSPA1A/NSFL1C/DCTN2/LCMT1
Heart - Atrial Appendage	GO:0033273	response to vitamin	6/85	16/579	0.0705882	0.0276339	2.55441	0.0197135	SPP1/CD4/SOD2/BMP7/STC1/GSTP1
Heart - Atrial Appendage	GO:0010633	negative regulation of epithelial cell migration	5/85	12/579	0.0588235	0.0207254	2.83824	0.0206824	BMP10/STC1/SERPINF1/NOTCH1/DLL4
Heart - Atrial Appendage	GO:0051048	negative regulation of secretion	5/85	12/579	0.0588235	0.0207254	2.83824	0.0206824	LGALS9/ANXA1/TNFRSF1B/TNFRSF1A/NOTCH1
Heart - Atrial Appendage	GO:1903531	negative regulation of secretion by cell	5/85	12/579	0.0588235	0.0207254	2.83824	0.0206824	LGALS9/ANXA1/TNFRSF1B/TNFRSF1A/NOTCH1
Heart - Atrial Appendage	GO:0070925	organelle assembly	9/85	30/579	0.105882	0.0518135	2.04353	0.0212773	CSRP3/BMP10/TNNT2/HSPA1A/NOTCH1/NSFL1C/DCTN2/PRKACA/NUDCD3
Heart - Atrial Appendage	GO:0060537	muscle tissue development	10/85	35/579	0.117647	0.0604491	1.94622	0.0217118	CSRP3/BMP10/TNNT2/CALR/DLL1/VEGFA/BMP7/NOTCH1/MAP2K4/DLL4
Heart - Atrial Appendage	GO:0032870	cellular response to hormone stimulus	14/85	56/579	0.164706	0.0967185	1.70294	0.0227116	CSRP3/IGFBP2/CALR/ANXA1/BMP7/STC1/GOT1/SERPINF1/GSTP1/NOTCH1/PARK7/PRKACA/CRK/SHC1
Heart - Atrial Appendage	GO:0045446	endothelial cell differentiation	7/85	21/579	0.0823529	0.0362694	2.27059	0.0234774	NRP1/DLL1/VEGFA/STC1/TNFRSF1A/KDR/NOTCH1
Heart - Atrial Appendage	GO:0010721	negative regulation of cell development	7/85	21/579	0.0823529	0.0362694	2.27059	0.0234774	SPP1/NRP1/VEGFA/BMP7/B2M/NOTCH1/SEMA6B
Heart - Atrial Appendage	GO:2001243	negative regulation of intrinsic apoptotic signaling pathway	7/85	21/579	0.0823529	0.0362694	2.27059	0.0234774	SOD2/ENO1/PLAUR/HSPA1A/MCL1/PARK7/TXNDC12
Heart - Atrial Appendage	GO:0010632	regulation of epithelial cell migration	12/85	46/579	0.141176	0.0794473	1.77698	0.0250889	BMP10/CALR/NRP1/EPHA2/ANXA1/VEGFA/STC1/FGFR1/SERPINF1/KDR/NOTCH1/DLL4
Heart - Atrial Appendage	GO:0051094	positive regulation of developmental process	28/85	138/579	0.329412	0.238342	1.3821	0.0253491	BMP10/CD4/SOD2/CALR/NRP1/ISG15/LGALS9/ANXA1/DLL1/VEGFA/BMP7/TNFRSF1B/F3/B2M/HSPA1A/TIMP2/TNFRSF1A/CSF1/FGFR1/SERPINF1/KDR/BMP1/DDR2/NBL1/SCARF1/NOTCH1/CAMK1/CRK
Heart - Atrial Appendage	GO:0045597	positive regulation of cell differentiation	22/85	102/579	0.258824	0.176166	1.4692	0.0253634	BMP10/CD4/SOD2/CALR/NRP1/ISG15/LGALS9/ANXA1/VEGFA/BMP7/TNFRSF1B/HSPA1A/TIMP2/CSF1/FGFR1/SERPINF1/KDR/DDR2/NBL1/NOTCH1/CAMK1/CRK
Heart - Atrial Appendage	GO:0050767	regulation of neurogenesis	11/85	41/579	0.129412	0.0708117	1.82755	0.0259586	SPP1/NRP1/DLL1/VEGFA/BMP7/TNFRSF1B/B2M/SERPINF1/NOTCH1/DLL4/SEMA6B
Heart - Atrial Appendage	GO:0060284	regulation of cell development	14/85	57/579	0.164706	0.0984456	1.67307	0.0264663	SPP1/CALR/NRP1/DLL1/VEGFA/BMP7/TNFRSF1B/B2M/TNFRSF1A/SERPINF1/NOTCH1/DLL4/CRK/SEMA6B
Heart - Atrial Appendage	GO:0050793	regulation of developmental process	39/85	208/579	0.458824	0.35924	1.27721	0.0267162	BMP10/EFEMP1/THBS2/SPP1/CD4/SOD2/TNFRSF21/CALR/NRP1/ISG15/LGALS9/EPHA2/ANXA1/DLL1/VEGFA/BMP7/TNFRSF1B/F3/B2M/HSPA1A/TIMP2/CST3/TNFRSF1A/CSF1/FGFR1/SERPINF1/KDR/BMP1/DDR2/NBL1/JAM2/SCARF1/NOTCH1/FSTL3/DLL4/CAMK1/PRKACA/CRK/SEMA6B
Heart - Atrial Appendage	GO:0051961	negative regulation of nervous system development	6/85	17/579	0.0705882	0.029361	2.40415	0.026928	SPP1/NRP1/BMP7/B2M/NOTCH1/SEMA6B
Heart - Atrial Appendage	GO:0050768	negative regulation of neurogenesis	6/85	17/579	0.0705882	0.029361	2.40415	0.026928	SPP1/NRP1/BMP7/B2M/NOTCH1/SEMA6B
Heart - Atrial Appendage	GO:0030154	cell differentiation	48/85	268/579	0.564706	0.462867	1.22002	0.0274922	CSRP3/FABP3/BMP10/TNNT2/EFEMP1/SPP1/CD4/SOD2/TNFRSF21/CALR/NRP1/ISG15/LGALS9/EPHA2/ANXA1/DLL1/VEGFA/BMP7/STC1/TNFRSF1B/S100A9/GOT1/B2M/HSPA1A/TIMP2/TNFRSF1A/CSF1/FGFR1/SERPINF1/KDR/GSTP1/MCL1/BMP1/DDR2/NBL1/JAM2/SCARF1/NOTCH1/MAP2K4/EFNB1/FSTL3/CHRDL1/DLL4/CAMK1/PRKACA/CRK/SEMA6B/SHC1
Heart - Atrial Appendage	GO:0048869	cellular developmental process	48/85	269/579	0.564706	0.464594	1.21548	0.0297675	CSRP3/FABP3/BMP10/TNNT2/EFEMP1/SPP1/CD4/SOD2/TNFRSF21/CALR/NRP1/ISG15/LGALS9/EPHA2/ANXA1/DLL1/VEGFA/BMP7/STC1/TNFRSF1B/S100A9/GOT1/B2M/HSPA1A/TIMP2/TNFRSF1A/CSF1/FGFR1/SERPINF1/KDR/GSTP1/MCL1/BMP1/DDR2/NBL1/JAM2/SCARF1/NOTCH1/MAP2K4/EFNB1/FSTL3/CHRDL1/DLL4/CAMK1/PRKACA/CRK/SEMA6B/SHC1
Heart - Atrial Appendage	GO:0014031	mesenchymal cell development	5/85	13/579	0.0588235	0.0224525	2.61991	0.0297787	NRP1/BMP7/NOTCH1/EFNB1/SEMA6B
Heart - Atrial Appendage	GO:0140014	mitotic nuclear division	5/85	13/579	0.0588235	0.0224525	2.61991	0.0297787	BMP7/HSPA1A/NSFL1C/DCTN2/LCMT1
Heart - Atrial Appendage	GO:0007566	embryo implantation	5/85	13/579	0.0588235	0.0224525	2.61991	0.0297787	TIMP1/SPP1/CALR/VEGFA/STC1
Heart - Atrial Appendage	GO:0048592	eye morphogenesis	5/85	13/579	0.0588235	0.0224525	2.61991	0.0297787	EFEMP1/EPHA2/DLL1/VEGFA/BMP7
Heart - Atrial Appendage	GO:0035924	cellular response to vascular endothelial growth factor stimulus	7/85	22/579	0.0823529	0.0379965	2.16738	0.0303878	NRP1/ANXA1/DLL1/VEGFA/KDR/NOTCH1/DLL4
Heart - Atrial Appendage	GO:0043535	regulation of blood vessel endothelial cell migration	7/85	22/579	0.0823529	0.0379965	2.16738	0.0303878	EPHA2/ANXA1/VEGFA/FGFR1/KDR/NOTCH1/DLL4
Heart - Atrial Appendage	GO:0032502	developmental process	59/85	346/579	0.694118	0.597582	1.16154	0.0312737	CSRP3/FABP3/BMP10/TNNT2/IGFBP2/EFEMP1/BGN/THBS2/TIMP1/SPP1/CD4/SOD2/LYVE1/TNFRSF21/CALR/NRP1/ISG15/LGALS9/EPHA2/ANXA1/TNFRSF19/DLL1/VEGFA/BMP7/STC1/TNFRSF1B/S100A9/F3/GOT1/B2M/CKB/HSPA1A/TIMP2/CST3/TNFRSF1A/CSF1/FGFR1/SERPINF1/KDR/GSTP1/MCL1/BMP1/ECE1/DDR2/NBL1/JAM2/SCARF1/NOTCH1/MAP2K4/CAPG/EFNB1/FSTL3/CHRDL1/DLL4/CAMK1/PRKACA/CRK/SEMA6B/SHC1
Heart - Atrial Appendage	GO:0048856	anatomical structure development	56/85	325/579	0.658824	0.561313	1.17372	0.0318131	CSRP3/BMP10/TNNT2/EFEMP1/BGN/THBS2/TIMP1/SPP1/CD4/SOD2/LYVE1/TNFRSF21/CALR/NRP1/ISG15/LGALS9/EPHA2/ANXA1/TNFRSF19/DLL1/VEGFA/BMP7/STC1/TNFRSF1B/S100A9/F3/B2M/CKB/HSPA1A/TIMP2/CST3/TNFRSF1A/CSF1/FGFR1/SERPINF1/KDR/GSTP1/MCL1/BMP1/ECE1/DDR2/NBL1/JAM2/SCARF1/NOTCH1/MAP2K4/CAPG/EFNB1/FSTL3/CHRDL1/DLL4/CAMK1/PRKACA/CRK/SEMA6B/SHC1
Heart - Atrial Appendage	GO:0060562	epithelial tube morphogenesis	10/85	37/579	0.117647	0.0639033	1.84102	0.0319102	NRP1/EPHA2/DLL1/VEGFA/BMP7/CSF1/KDR/NOTCH1/DLL4/PRKACA
Heart - Atrial Appendage	GO:0043534	blood vessel endothelial cell migration	8/85	27/579	0.0941176	0.0466321	2.0183	0.0319843	NRP1/EPHA2/ANXA1/VEGFA/FGFR1/KDR/NOTCH1/DLL4
Heart - Atrial Appendage	GO:0061448	connective tissue development	9/85	32/579	0.105882	0.0552677	1.91581	0.0323518	BMP10/EFEMP1/BGN/TIMP1/BMP7/STC1/CSF1/BMP1/NOTCH1
Heart - Atrial Appendage	GO:0007275	multicellular organism development	54/85	312/579	0.635294	0.53886	1.17896	0.0342873	CSRP3/BMP10/TNNT2/EFEMP1/BGN/THBS2/TIMP1/SPP1/CD4/SOD2/TNFRSF21/CALR/NRP1/ISG15/LGALS9/EPHA2/ANXA1/TNFRSF19/DLL1/VEGFA/BMP7/STC1/TNFRSF1B/S100A9/F3/B2M/CKB/HSPA1A/TIMP2/TNFRSF1A/CSF1/FGFR1/SERPINF1/KDR/GSTP1/MCL1/BMP1/ECE1/DDR2/NBL1/JAM2/SCARF1/NOTCH1/MAP2K4/CAPG/EFNB1/FSTL3/CHRDL1/DLL4/CAMK1/PRKACA/CRK/SEMA6B/SHC1
Heart - Atrial Appendage	GO:0050920	regulation of chemotaxis	12/85	48/579	0.141176	0.0829016	1.70294	0.0347407	CALR/NRP1/LGALS9/VEGFA/F3/CSF1/FGFR1/KDR/GSTP1/NBL1/NOTCH1/SEMA6B
Heart - Atrial Appendage	GO:0007399	nervous system development	31/85	160/579	0.364706	0.276339	1.31978	0.0348681	SPP1/TNFRSF21/CALR/NRP1/EPHA2/ANXA1/DLL1/VEGFA/BMP7/TNFRSF1B/S100A9/B2M/CKB/TIMP2/CSF1/FGFR1/SERPINF1/GSTP1/NBL1/JAM2/SCARF1/NOTCH1/CAPG/EFNB1/CHRDL1/DLL4/CAMK1/PRKACA/CRK/SEMA6B/SHC1
Heart - Atrial Appendage	GO:0048513	animal organ development	42/85	231/579	0.494118	0.398964	1.2385	0.0351675	CSRP3/BMP10/TNNT2/EFEMP1/BGN/TIMP1/SPP1/CD4/CALR/NRP1/ISG15/LGALS9/EPHA2/ANXA1/TNFRSF19/DLL1/VEGFA/BMP7/STC1/TNFRSF1B/B2M/CKB/HSPA1A/TNFRSF1A/CSF1/FGFR1/SERPINF1/KDR/GSTP1/BMP1/ECE1/DDR2/NBL1/NOTCH1/MAP2K4/EFNB1/FSTL3/CHRDL1/DLL4/CRK/SEMA6B/SHC1
Heart - Atrial Appendage	GO:0046578	regulation of Ras protein signal transduction	6/85	18/579	0.0705882	0.0310881	2.27059	0.0357117	NRP1/TIMP2/CSF1/NOTCH1/CRK/SHC1
Heart - Atrial Appendage	GO:2000146	negative regulation of cell motility	10/85	38/579	0.117647	0.0656304	1.79257	0.038119	BMP10/TIMP1/CALR/STC1/SERPINF1/GSTP1/NBL1/NOTCH1/DLL4/CRK
Heart - Atrial Appendage	GO:0007584	response to nutrient	7/85	23/579	0.0823529	0.0397237	2.07315	0.0385591	IGFBP2/SPP1/CD4/SOD2/BMP7/STC1/GSTP1
Heart - Atrial Appendage	GO:0010811	positive regulation of cell-substrate adhesion	7/85	23/579	0.0823529	0.0397237	2.07315	0.0385591	CALR/NRP1/CCDC80/VEGFA/CSF1/KDR/CRK
Heart - Atrial Appendage	GO:0070663	regulation of leukocyte proliferation	9/85	33/579	0.105882	0.0569948	1.85775	0.0391824	IGFBP2/CD4/TNFRSF21/LGALS9/ANXA1/TNFRSF1B/CSF1/GSTP1/EFNB1
Heart - Atrial Appendage	GO:0032944	regulation of mononuclear cell proliferation	8/85	28/579	0.0941176	0.0483592	1.94622	0.0394781	IGFBP2/CD4/TNFRSF21/LGALS9/ANXA1/TNFRSF1B/CSF1/EFNB1
Heart - Atrial Appendage	GO:0090257	regulation of muscle system process	8/85	28/579	0.0941176	0.0483592	1.94622	0.0394781	BMP10/TNNT2/ENO1/STC1/TNFRSF1B/TNFRSF1A/NOTCH1/PRKACA
Heart - Atrial Appendage	GO:0043542	endothelial cell migration	12/85	49/579	0.141176	0.0846287	1.66819	0.0404617	BMP10/CALR/NRP1/EPHA2/ANXA1/VEGFA/STC1/FGFR1/SERPINF1/KDR/NOTCH1/DLL4
Heart - Atrial Appendage	GO:1903053	regulation of extracellular matrix organization	5/85	14/579	0.0588235	0.0241796	2.43277	0.0410607	TNFRSF1B/CST3/TNFRSF1A/DDR2/NOTCH1
Heart - Atrial Appendage	GO:0022008	neurogenesis	26/85	131/579	0.305882	0.226252	1.35195	0.0420163	SPP1/TNFRSF21/CALR/NRP1/EPHA2/ANXA1/DLL1/VEGFA/BMP7/TNFRSF1B/S100A9/B2M/TIMP2/CSF1/FGFR1/SERPINF1/GSTP1/NBL1/SCARF1/NOTCH1/EFNB1/DLL4/CAMK1/CRK/SEMA6B/SHC1
Heart - Atrial Appendage	GO:0045785	positive regulation of cell adhesion	15/85	66/579	0.176471	0.11399	1.54813	0.0426439	IGFBP2/CD4/CALR/NRP1/CCDC80/LGALS9/ANXA1/VEGFA/BMP7/PLAUR/CSF1/KDR/EFNB1/FSTL3/CRK
Heart - Atrial Appendage	GO:0006935	chemotaxis	21/85	101/579	0.247059	0.174439	1.41631	0.043177	CALR/NRP1/LGALS9/EPHA2/ANXA1/VEGFA/BMP7/PLAUR/S100A9/F3/CSF1/FGFR1/KDR/GSTP1/NBL1/NOTCH1/EFNB1/IL17RC/CRK/SEMA6B/SHC1
Heart - Atrial Appendage	GO:0042330	taxis	21/85	101/579	0.247059	0.174439	1.41631	0.043177	CALR/NRP1/LGALS9/EPHA2/ANXA1/VEGFA/BMP7/PLAUR/S100A9/F3/CSF1/FGFR1/KDR/GSTP1/NBL1/NOTCH1/EFNB1/IL17RC/CRK/SEMA6B/SHC1
Heart - Atrial Appendage	GO:0003012	muscle system process	10/85	39/579	0.117647	0.0673575	1.74661	0.0451268	CSRP3/BMP10/TNNT2/ENO1/STC1/TNFRSF1B/TNFRSF1A/NOTCH1/MAP2K4/PRKACA
Heart - Atrial Appendage	GO:0051271	negative regulation of cellular component movement	10/85	39/579	0.117647	0.0673575	1.74661	0.0451268	BMP10/TIMP1/CALR/STC1/SERPINF1/GSTP1/NBL1/NOTCH1/DLL4/CRK
Heart - Atrial Appendage	GO:0003176	aortic valve development	4/85	10/579	0.0470588	0.0172712	2.72471	0.0451283	TNFRSF1B/TNFRSF1A/NOTCH1/DLL4
Heart - Atrial Appendage	GO:0055008	cardiac muscle tissue morphogenesis	4/85	10/579	0.0470588	0.0172712	2.72471	0.0451283	BMP10/TNNT2/NOTCH1/DLL4
Heart - Atrial Appendage	GO:0032613	interleukin-10 production	4/85	10/579	0.0470588	0.0172712	2.72471	0.0451283	TNFRSF21/ISG15/LGALS9/DLL1
Heart - Atrial Appendage	GO:0048644	muscle organ morphogenesis	4/85	10/579	0.0470588	0.0172712	2.72471	0.0451283	BMP10/TNNT2/NOTCH1/DLL4
Heart - Atrial Appendage	GO:0060415	muscle tissue morphogenesis	4/85	10/579	0.0470588	0.0172712	2.72471	0.0451283	BMP10/TNNT2/NOTCH1/DLL4
Heart - Atrial Appendage	GO:0003229	ventricular cardiac muscle tissue development	4/85	10/579	0.0470588	0.0172712	2.72471	0.0451283	BMP10/TNNT2/NOTCH1/DLL4
Heart - Atrial Appendage	GO:0055010	ventricular cardiac muscle tissue morphogenesis	4/85	10/579	0.0470588	0.0172712	2.72471	0.0451283	BMP10/TNNT2/NOTCH1/DLL4
Heart - Atrial Appendage	GO:0048593	camera-type eye morphogenesis	4/85	10/579	0.0470588	0.0172712	2.72471	0.0451283	EPHA2/DLL1/VEGFA/BMP7
Heart - Atrial Appendage	GO:0090288	negative regulation of cellular response to growth factor stimulus	4/85	10/579	0.0470588	0.0172712	2.72471	0.0451283	NBL1/NOTCH1/FSTL3/CHRDL1
Heart - Atrial Appendage	GO:0031341	regulation of cell killing	4/85	10/579	0.0470588	0.0172712	2.72471	0.0451283	LGALS9/B2M/CD59/CRK
Heart - Atrial Appendage	GO:0042592	homeostatic process	27/85	138/579	0.317647	0.238342	1.33274	0.0453008	CSRP3/FABP3/SPP1/CD4/SOD2/CALR/ISG15/LGALS9/ANXA1/DLL1/IGHA1/VEGFA/STC1/S100A9/GOT1/B2M/CKB/HSPA1A/CSF1/SERPINF1/KDR/GSTP1/MCL1/JAM2/NOTCH1/PARK7/PRKACA
Heart - Atrial Appendage	GO:0032501	multicellular organismal process	64/85	387/579	0.752941	0.668394	1.12649	0.0456	CSRP3/BMP10/TNNT2/IGFBP2/EFEMP1/BGN/THBS2/TIMP1/SPP1/CD4/SOD2/TNFRSF21/CALR/NRP1/ENO1/ISG15/LGALS9/EPHA2/ANXA1/TNFRSF19/DLL1/IGHA1/VEGFA/BMP7/STC1/TNFRSF1B/PLAUR/S100A9/VWF/F3/B2M/CKB/HSPA1A/TIMP2/CST3/TNFRSF1A/CSF1/FGFR1/SERPINF1/KDR/GSTP1/MCL1/BMP1/ECE1/DDR2/CD59/NBL1/JAM2/SCARF1/NOTCH1/MAP2K4/CAPG/EFNB1/PARK7/FSTL3/CHRDL1/CBX5/DLL4/CAMK1/PRKACA/IL17RC/CRK/SEMA6B/SHC1
Heart - Atrial Appendage	GO:0032946	positive regulation of mononuclear cell proliferation	6/85	19/579	0.0705882	0.0328152	2.15108	0.0461612	IGFBP2/CD4/LGALS9/ANXA1/CSF1/EFNB1
Heart - Atrial Appendage	GO:0045229	external encapsulating structure organization	14/85	61/579	0.164706	0.105354	1.56336	0.0462381	BGN/TIMP1/SPP1/CCDC80/TNFRSF1B/VWF/TIMP2/CST3/TNFRSF1A/KDR/BMP1/DDR2/JAM2/NOTCH1
Heart - Atrial Appendage	GO:0030198	extracellular matrix organization	14/85	61/579	0.164706	0.105354	1.56336	0.0462381	BGN/TIMP1/SPP1/CCDC80/TNFRSF1B/VWF/TIMP2/CST3/TNFRSF1A/KDR/BMP1/DDR2/JAM2/NOTCH1
Heart - Atrial Appendage	GO:0043062	extracellular structure organization	14/85	61/579	0.164706	0.105354	1.56336	0.0462381	BGN/TIMP1/SPP1/CCDC80/TNFRSF1B/VWF/TIMP2/CST3/TNFRSF1A/KDR/BMP1/DDR2/JAM2/NOTCH1
Heart - Atrial Appendage	GO:0061061	muscle structure development	12/85	50/579	0.141176	0.0863558	1.63482	0.0468226	CSRP3/BMP10/TNNT2/SOD2/CALR/DLL1/VEGFA/JAM2/NOTCH1/MAP2K4/DLL4/CAMK1
Heart - Atrial Appendage	GO:0048585	negative regulation of response to stimulus	32/85	170/579	0.376471	0.29361	1.28221	0.0476838	IGFBP2/SPP1/SOD2/CALR/NRP1/ENO1/LGALS9/EPHA2/ANXA1/IGFBP6/DLL1/BMP7/TNFRSF1B/PLAUR/HSPA1A/TIMP2/TNFRSF1A/SERPINF1/GSTP1/MCL1/CD59/NBL1/IGFBP4/NOTCH1/PARK7/FSTL3/CHRDL1/DLL4/PRKACA/CRK/SEMA6B/TXNDC12
Heart - Atrial Appendage	GO:0030031	cell projection assembly	7/85	24/579	0.0823529	0.0414508	1.98676	0.0480635	NRP1/EPHA2/NOTCH1/CAPG/DCTN2/PRKACA/NUDCD3
Heart - Atrial Appendage	GO:0042129	regulation of T cell proliferation	7/85	24/579	0.0823529	0.0414508	1.98676	0.0480635	IGFBP2/CD4/TNFRSF21/LGALS9/ANXA1/TNFRSF1B/EFNB1
Heart - Atrial Appendage	GO:0061138	morphogenesis of a branching epithelium	8/85	29/579	0.0941176	0.0500864	1.87911	0.0480735	NRP1/EPHA2/VEGFA/BMP7/CSF1/KDR/NOTCH1/DLL4
Heart - Atrial Appendage	GO:0001763	morphogenesis of a branching structure	8/85	29/579	0.0941176	0.0500864	1.87911	0.0480735	NRP1/EPHA2/VEGFA/BMP7/CSF1/KDR/NOTCH1/DLL4
Heart - Atrial Appendage	GO:0010975	regulation of neuron projection development	11/85	45/579	0.129412	0.0777202	1.6651	0.0499642	SPP1/NRP1/VEGFA/BMP7/S100A9/B2M/SERPINF1/SCARF1/CAMK1/CRK/SEMA6B
Heart - Left Ventricle	GO:0060326	cell chemotaxis	16/73	50/487	0.219178	0.102669	2.13479	0.00102398	VEGFD/CALR/NRP1/LGALS9/EPHA2/ANXA1/VEGFA/S100A9/CSF1/FGFR1/KDR/GSTP1/NBL1/NOTCH1/IL17RC/CRK
Heart - Left Ventricle	GO:0002040	sprouting angiogenesis	9/73	21/487	0.123288	0.0431211	2.8591	0.00154552	VEGFD/NRP1/EPHA2/ANXA1/DLL1/VEGFA/KDR/NOTCH1/DLL4
Heart - Left Ventricle	GO:0002042	cell migration involved in sprouting angiogenesis	6/73	11/487	0.0821918	0.0225873	3.63885	0.00232189	NRP1/ANXA1/VEGFA/KDR/NOTCH1/DLL4
Heart - Left Ventricle	GO:0045664	regulation of neuron differentiation	7/73	15/487	0.0958904	0.0308008	3.11324	0.00305172	CALR/DLL1/B2M/TIMP2/FGFR1/NBL1/NOTCH1
Heart - Left Ventricle	GO:0035924	cellular response to vascular endothelial growth factor stimulus	8/73	19/487	0.109589	0.0390144	2.80894	0.0033364	VEGFD/NRP1/ANXA1/DLL1/VEGFA/KDR/NOTCH1/DLL4
Heart - Left Ventricle	GO:0048754	branching morphogenesis of an epithelial tube	7/73	16/487	0.0958904	0.0328542	2.91866	0.00477569	NRP1/EPHA2/VEGFA/CSF1/KDR/NOTCH1/DLL4
Heart - Left Ventricle	GO:0043010	camera-type eye development	7/73	16/487	0.0958904	0.0328542	2.91866	0.00477569	EFEMP1/NRP1/EPHA2/DLL1/VEGFA/SERPINF1/DLL4
Heart - Left Ventricle	GO:2000026	regulation of multicellular organismal development	26/73	111/487	0.356164	0.227926	1.56263	0.004795	EFEMP1/THBS2/VEGFD/TNFRSF21/NRP1/ISG15/LGALS9/EPHA2/ANXA1/DLL1/VEGFA/TNFRSF1B/F3/B2M/HSPA1A/TNFRSF1A/CSF1/SERPINF1/KDR/BMP1/DDR2/JAM2/NOTCH1/FSTL3/DLL4/SEMA6B
Heart - Left Ventricle	GO:0051960	regulation of nervous system development	11/73	33/487	0.150685	0.0677618	2.22374	0.00501106	TNFRSF21/NRP1/DLL1/VEGFA/TNFRSF1B/B2M/SERPINF1/JAM2/NOTCH1/DLL4/SEMA6B
Heart - Left Ventricle	GO:0022008	neurogenesis	25/73	106/487	0.342466	0.217659	1.5734	0.00530551	VEGFD/TNFRSF21/CALR/NRP1/EPHA2/ANXA1/DLL1/VEGFA/TNFRSF1B/S100A9/B2M/TIMP2/CSF1/FGFR1/SERPINF1/GSTP1/NBL1/SCARF1/NOTCH1/EFNB1/DLL4/CAMK1/CRK/SEMA6B/SHC1
Heart - Left Ventricle	GO:0048731	system development	47/73	244/487	0.643836	0.501027	1.28503	0.00567722	CSRP3/TNNT2/EFEMP1/BGN/THBS2/TIMP1/VEGFD/SOD2/TNFRSF21/CALR/NRP1/ISG15/LGALS9/EPHA2/ANXA1/TNFRSF19/DLL1/VEGFA/TNFRSF1B/S100A9/F3/B2M/CKB/HSPA1A/TIMP2/TNFRSF1A/CSF1/FGFR1/SERPINF1/KDR/GSTP1/BMP1/ECE1/DDR2/NBL1/JAM2/SCARF1/NOTCH1/MAP2K4/EFNB1/FSTL3/DLL4/CAMK1/PRKACA/CRK/SEMA6B/SHC1
Heart - Left Ventricle	GO:0050920	regulation of chemotaxis	13/73	43/487	0.178082	0.0882957	2.01688	0.00586122	VEGFD/CALR/NRP1/LGALS9/VEGFA/F3/CSF1/FGFR1/KDR/GSTP1/NBL1/NOTCH1/SEMA6B
Heart - Left Ventricle	GO:0045595	regulation of cell differentiation	28/73	125/487	0.383562	0.256674	1.49436	0.00663546	EFEMP1/SOD2/TNFRSF21/CALR/NRP1/ISG15/LGALS9/ANXA1/DLL1/VEGFA/TNFRSF1B/B2M/HSPA1A/TIMP2/TNFRSF1A/CSF1/FGFR1/SERPINF1/KDR/DDR2/NBL1/NOTCH1/FSTL3/DLL4/CAMK1/PRKACA/CRK/SEMA6B
Heart - Left Ventricle	GO:0050793	regulation of developmental process	36/73	174/487	0.493151	0.35729	1.38026	0.00692016	EFEMP1/THBS2/VEGFD/SOD2/TNFRSF21/CALR/NRP1/ISG15/LGALS9/EPHA2/ANXA1/DLL1/VEGFA/TNFRSF1B/F3/B2M/HSPA1A/TIMP2/CST3/TNFRSF1A/CSF1/FGFR1/SERPINF1/KDR/BMP1/DDR2/NBL1/JAM2/SCARF1/NOTCH1/FSTL3/DLL4/CAMK1/PRKACA/CRK/SEMA6B
Heart - Left Ventricle	GO:0051241	negative regulation of multicellular organismal process	22/73	91/487	0.30137	0.186858	1.61283	0.00698045	EFEMP1/THBS2/TIMP1/TNFRSF21/CALR/NRP1/ISG15/LGALS9/EPHA2/ANXA1/DLL1/TNFRSF1B/B2M/CST3/TNFRSF1A/SERPINF1/GSTP1/JAM2/NOTCH1/FSTL3/DLL4/SEMA6B
Heart - Left Ventricle	GO:0042692	muscle cell differentiation	10/73	30/487	0.136986	0.0616016	2.22374	0.00755969	CSRP3/TNNT2/SOD2/CALR/DLL1/VEGFA/JAM2/NOTCH1/MAP2K4/CAMK1
Heart - Left Ventricle	GO:0032502	developmental process	53/73	289/487	0.726027	0.593429	1.22344	0.00797269	CSRP3/FABP3/TNNT2/IGFBP2/EFEMP1/BGN/THBS2/TIMP1/VEGFD/SOD2/LYVE1/TNFRSF21/CALR/NRP1/ISG15/LGALS9/EPHA2/ANXA1/TNFRSF19/DLL1/VEGFA/TNFRSF1B/S100A9/F3/GOT1/B2M/CKB/HSPA1A/TIMP2/CST3/TNFRSF1A/CSF1/FGFR1/SERPINF1/KDR/GSTP1/MCL1/BMP1/ECE1/DDR2/NBL1/JAM2/SCARF1/NOTCH1/MAP2K4/EFNB1/FSTL3/DLL4/CAMK1/PRKACA/CRK/SEMA6B/SHC1
Heart - Left Ventricle	GO:0006935	chemotaxis	20/73	81/487	0.273973	0.166324	1.64722	0.00816476	VEGFD/CALR/NRP1/LGALS9/EPHA2/ANXA1/VEGFA/S100A9/F3/CSF1/FGFR1/KDR/GSTP1/NBL1/NOTCH1/EFNB1/IL17RC/CRK/SEMA6B/SHC1
Heart - Left Ventricle	GO:0042330	taxis	20/73	81/487	0.273973	0.166324	1.64722	0.00816476	VEGFD/CALR/NRP1/LGALS9/EPHA2/ANXA1/VEGFA/S100A9/F3/CSF1/FGFR1/KDR/GSTP1/NBL1/NOTCH1/EFNB1/IL17RC/CRK/SEMA6B/SHC1
Heart - Left Ventricle	GO:0007399	nervous system development	28/73	127/487	0.383562	0.26078	1.47082	0.00856503	VEGFD/TNFRSF21/CALR/NRP1/EPHA2/ANXA1/DLL1/VEGFA/TNFRSF1B/S100A9/B2M/CKB/TIMP2/CSF1/FGFR1/SERPINF1/GSTP1/NBL1/JAM2/SCARF1/NOTCH1/EFNB1/DLL4/CAMK1/PRKACA/CRK/SEMA6B/SHC1
Heart - Left Ventricle	GO:0048856	anatomical structure development	50/73	269/487	0.684932	0.552361	1.24001	0.00897222	CSRP3/TNNT2/EFEMP1/BGN/THBS2/TIMP1/VEGFD/SOD2/LYVE1/TNFRSF21/CALR/NRP1/ISG15/LGALS9/EPHA2/ANXA1/TNFRSF19/DLL1/VEGFA/TNFRSF1B/S100A9/F3/B2M/CKB/HSPA1A/TIMP2/CST3/TNFRSF1A/CSF1/FGFR1/SERPINF1/KDR/GSTP1/MCL1/BMP1/ECE1/DDR2/NBL1/JAM2/SCARF1/NOTCH1/MAP2K4/EFNB1/FSTL3/DLL4/CAMK1/PRKACA/CRK/SEMA6B/SHC1
Heart - Left Ventricle	GO:0055007	cardiac muscle cell differentiation	5/73	10/487	0.0684932	0.0205339	3.33562	0.0090834	CSRP3/CALR/DLL1/VEGFA/MAP2K4
Heart - Left Ventricle	GO:0003300	cardiac muscle hypertrophy	5/73	10/487	0.0684932	0.0205339	3.33562	0.0090834	CSRP3/TNFRSF1B/TNFRSF1A/NOTCH1/MAP2K4
Heart - Left Ventricle	GO:0030154	cell differentiation	43/73	222/487	0.589041	0.455852	1.29218	0.00944676	CSRP3/FABP3/TNNT2/EFEMP1/VEGFD/SOD2/TNFRSF21/CALR/NRP1/ISG15/LGALS9/EPHA2/ANXA1/DLL1/VEGFA/TNFRSF1B/S100A9/GOT1/B2M/HSPA1A/TIMP2/TNFRSF1A/CSF1/FGFR1/SERPINF1/KDR/GSTP1/MCL1/BMP1/DDR2/NBL1/JAM2/SCARF1/NOTCH1/MAP2K4/EFNB1/FSTL3/DLL4/CAMK1/PRKACA/CRK/SEMA6B/SHC1
Heart - Left Ventricle	GO:0051146	striated muscle cell differentiation	8/73	22/487	0.109589	0.0451745	2.4259	0.00960698	CSRP3/TNNT2/CALR/DLL1/VEGFA/JAM2/NOTCH1/MAP2K4
Heart - Left Ventricle	GO:0001654	eye development	7/73	18/487	0.0958904	0.036961	2.59437	0.0102983	EFEMP1/NRP1/EPHA2/DLL1/VEGFA/SERPINF1/DLL4
Heart - Left Ventricle	GO:0048869	cellular developmental process	43/73	223/487	0.589041	0.457906	1.28638	0.0104688	CSRP3/FABP3/TNNT2/EFEMP1/VEGFD/SOD2/TNFRSF21/CALR/NRP1/ISG15/LGALS9/EPHA2/ANXA1/DLL1/VEGFA/TNFRSF1B/S100A9/GOT1/B2M/HSPA1A/TIMP2/TNFRSF1A/CSF1/FGFR1/SERPINF1/KDR/GSTP1/MCL1/BMP1/DDR2/NBL1/JAM2/SCARF1/NOTCH1/MAP2K4/EFNB1/FSTL3/DLL4/CAMK1/PRKACA/CRK/SEMA6B/SHC1
Heart - Left Ventricle	GO:0007275	multicellular organism development	48/73	257/487	0.657534	0.527721	1.24599	0.0107852	CSRP3/TNNT2/EFEMP1/BGN/THBS2/TIMP1/VEGFD/SOD2/TNFRSF21/CALR/NRP1/ISG15/LGALS9/EPHA2/ANXA1/TNFRSF19/DLL1/VEGFA/TNFRSF1B/S100A9/F3/B2M/CKB/HSPA1A/TIMP2/TNFRSF1A/CSF1/FGFR1/SERPINF1/KDR/GSTP1/MCL1/BMP1/ECE1/DDR2/NBL1/JAM2/SCARF1/NOTCH1/MAP2K4/EFNB1/FSTL3/DLL4/CAMK1/PRKACA/CRK/SEMA6B/SHC1
Heart - Left Ventricle	GO:0048738	cardiac muscle tissue development	8/73	23/487	0.109589	0.0472279	2.32043	0.0129596	CSRP3/TNNT2/CALR/DLL1/VEGFA/NOTCH1/MAP2K4/DLL4
Heart - Left Ventricle	GO:0030182	neuron differentiation	21/73	90/487	0.287671	0.184805	1.55662	0.0134693	VEGFD/TNFRSF21/CALR/NRP1/EPHA2/DLL1/VEGFA/S100A9/B2M/TIMP2/FGFR1/SERPINF1/NBL1/SCARF1/NOTCH1/EFNB1/DLL4/CAMK1/CRK/SEMA6B/SHC1
Heart - Left Ventricle	GO:0051094	positive regulation of developmental process	26/73	119/487	0.356164	0.244353	1.45758	0.0136973	VEGFD/SOD2/CALR/NRP1/ISG15/LGALS9/ANXA1/DLL1/VEGFA/TNFRSF1B/F3/B2M/HSPA1A/TIMP2/TNFRSF1A/CSF1/FGFR1/SERPINF1/KDR/BMP1/DDR2/NBL1/SCARF1/NOTCH1/CAMK1/CRK
Heart - Left Ventricle	GO:0048699	generation of neurons	22/73	96/487	0.30137	0.197125	1.52882	0.0140778	VEGFD/TNFRSF21/CALR/NRP1/EPHA2/DLL1/VEGFA/TNFRSF1B/S100A9/B2M/TIMP2/FGFR1/SERPINF1/NBL1/SCARF1/NOTCH1/EFNB1/DLL4/CAMK1/CRK/SEMA6B/SHC1
Heart - Left Ventricle	GO:0045165	cell fate commitment	5/73	11/487	0.0684932	0.0225873	3.03238	0.014718	NRP1/DLL1/MCL1/NOTCH1/DLL4
Heart - Left Ventricle	GO:0035767	endothelial cell chemotaxis	5/73	11/487	0.0684932	0.0225873	3.03238	0.014718	NRP1/VEGFA/FGFR1/KDR/NOTCH1
Heart - Left Ventricle	GO:0014897	striated muscle hypertrophy	5/73	11/487	0.0684932	0.0225873	3.03238	0.014718	CSRP3/TNFRSF1B/TNFRSF1A/NOTCH1/MAP2K4
Heart - Left Ventricle	GO:0038084	vascular endothelial growth factor signaling pathway	5/73	11/487	0.0684932	0.0225873	3.03238	0.014718	VEGFD/NRP1/DLL1/VEGFA/KDR
Heart - Left Ventricle	GO:0014896	muscle hypertrophy	5/73	11/487	0.0684932	0.0225873	3.03238	0.014718	CSRP3/TNFRSF1B/TNFRSF1A/NOTCH1/MAP2K4
Heart - Left Ventricle	GO:0060562	epithelial tube morphogenesis	9/73	28/487	0.123288	0.0574949	2.14432	0.0147432	NRP1/EPHA2/DLL1/VEGFA/CSF1/KDR/NOTCH1/DLL4/PRKACA
Heart - Left Ventricle	GO:0051239	regulation of multicellular organismal process	38/73	194/487	0.520548	0.398357	1.30674	0.0151019	CSRP3/TNNT2/EFEMP1/THBS2/TIMP1/VEGFD/TNFRSF21/CALR/NRP1/ENO1/ISG15/LGALS9/EPHA2/ANXA1/DLL1/VEGFA/TNFRSF1B/F3/B2M/HSPA1A/CST3/TNFRSF1A/CSF1/FGFR1/SERPINF1/KDR/GSTP1/BMP1/ECE1/DDR2/JAM2/NOTCH1/PARK7/FSTL3/DLL4/PRKACA/IL17RC/SEMA6B
Heart - Left Ventricle	GO:0035051	cardiocyte differentiation	6/73	15/487	0.0821918	0.0308008	2.66849	0.0151967	CSRP3/CALR/DLL1/VEGFA/NOTCH1/MAP2K4
[truncated: 401 more rows]

## Sheet: SuppTable6
Data feature A	Data feature B	Data Type A	Data Type B	Interaction Type	Regularized Partial Correlation	d-score (Event-free)	Direction (Event-free)	absolute d-score (Event-free)	d-score (incident HF)	Direction (incident HF)	absolute d-score (incident HF)
[truncated: 566 more rows]

[truncated: 4 more sheets: SuppTable7, SuppTable8, SuppTable9, SuppTable10]
